# Supplementary material for: Chromatin activation as a unifying principle underlying pathogenic mechanisms in multiple myeloma
Source: Genome Res. 2020 Sep;30(9):1217–27. doi: 10.1101/gr.265520.120 (PMC7545147; doi:10.1101/gr.265520.120)
Supplement: Supplemental Material [file supp_gr.265520.120_Supplemental_Table_S1.xlsx]

## Sheet: Hoja1
Supplemental Table S1. Experimental design. MM and normal B cell cases used for the study
sample	source	Selection markers	H3K27ac	H3K4me1	H3K4me3	H3K36me3	H3K9me3	H3K27me3	ATAC	WGBS	RNA-seq	Reference
MM54168	bone marrow	CD138+	Yes	Yes	Yes	Yes	Yes	Yes	Yes
MM54498	bone marrow	CD138+	Yes	Yes	Yes	Yes	Yes	Yes	Yes	Yes	Yes
MM54847	bone marrow	CD138+	Yes	Yes	Yes	Yes	Yes	Yes	Yes	Yes	Yes
MM55358	bone marrow	CD138+	Yes	Yes	Yes	Yes	Yes	Yes	Yes	Yes	Yes
MM26632	bone marrow	CD138+	Yes						Yes
MM26860	bone marrow	CD138+							Yes
MM41737	bone marrow	CD138+	Yes
MM42040	bone marrow	CD138+	Yes	Yes					Yes
MM58166	bone marrow	CD138+	Yes						Yes
MM58232	bone marrow	CD138+	Yes	Yes					Yes
MM58698	bone marrow	CD138+							Yes
MM58873	bone marrow	CD138+	Yes	Yes					Yes
MM58928	bone marrow	CD138+							Yes
MM58977	bone marrow	CD138+	Yes	Yes					Yes
MM59077	bone marrow	CD138+	Yes	Yes					Yes
MM59300	bone marrow	CD138+	Yes	Yes					Yes
MM54647	bone marrow	CD138+	Yes						Yes
MM26302	bone marrow	CD138+							Yes
MM35574	bone marrow	CD138+								Yes		Agirre, 2015
MM35174	bone marrow	CD138+								Yes		Agirre, 2015
pb-NBC1	peripheral blood	CD19+/CD27-/IgD+	Yes	Yes	Yes	Yes	Yes	Yes				Beekman, 2018
pb-NBC2	peripheral blood	CD19+/CD27-/IgD+	Yes	Yes	Yes	Yes	Yes	Yes				Beekman, 2018
pb-NBC3	peripheral blood	CD19+/CD27-/IgD+	Yes	Yes	Yes	Yes	Yes	Yes				Beekman, 2018
pb-NBC4	peripheral blood	CD19+/CD27-/IgD+									Yes	Beekman, 2018
pb-NBC5	peripheral blood	CD19+/CD27-/IgD+									Yes	Beekman, 2018
pb-NBC6	peripheral blood	CD19+/CD27-/IgD+									Yes	Beekman, 2018
pb-NBC7	peripheral blood	CD19+/CD27-/IgD+							Yes	Yes		Beekman, 2018
pb-NBC8	peripheral blood	CD19+/CD27-/IgD+								Yes		Kulis, 2015
pb-NBC9	peripheral blood	CD19+/CD27-/IgD+								Yes		Kulis, 2015
pb-NBC10	peripheral blood	CD19+/CD27-/IgD+							Yes			Beekman, 2018
pb-NBC11	peripheral blood	CD19+/CD27-/IgD+							Yes			Beekman, 2018
t-NBC1	tonsil	CD20+/CD38lo/CD23+	Yes	Yes	Yes	Yes	Yes	Yes				Beekman, 2018
t-NBC2	tonsil	CD20+/CD38lo/CD23+	Yes	Yes	Yes	Yes	Yes	Yes				Beekman, 2018
t-NBC3	tonsil	CD20+/CD38lo/CD23+	Yes	Yes	Yes	Yes	Yes	Yes				Beekman, 2018
t-NBC4	tonsil	CD20+/CD38lo/CD23+									Yes	Beekman, 2018
t-NBC5	tonsil	CD20+/CD38lo/CD23+									Yes	Beekman, 2018
t-NBC6	tonsil	CD20+/CD38lo/CD23+									Yes	Beekman, 2018
t-NBC7	tonsil	CD20+/CD38lo/CD23+							Yes			Beekman, 2018
t-NBC8	tonsil	CD20+/CD38lo/CD23+							Yes			Beekman, 2018
t-NBC9	tonsil	CD20+/CD38lo/CD23+							Yes			Beekman, 2018
GCBC1	tonsil	CD20hi/CD38mid	Yes	Yes	Yes	Yes	Yes	Yes				Beekman, 2018
GCBC2	tonsil	CD20hi/CD38mid	Yes	Yes	Yes	Yes	Yes	Yes		Yes	Yes	Beekman, 2018
GCBC3	tonsil	CD20hi/CD38mid	Yes	Yes	Yes	Yes	Yes	Yes		Yes	Yes	Beekman, 2018
GCBC4	tonsil	CD20hi/CD38mid									Yes	Beekman, 2018
GCBC5	tonsil	CD20hi/CD38mid								Yes		Kulis, 2015
GCBC6	tonsil	CD20hi/CD38mid							Yes			Beekman, 2018
GCBC7	tonsil	CD20hi/CD38mid							Yes			Beekman, 2018
GCBC8	tonsil	CD20hi/CD38mid							Yes			Beekman, 2018
MBC1	peripheral blood	CD19+/CD27+/IgA+ or IgG+	Yes	Yes	Yes	Yes	Yes	Yes				Beekman, 2018
MBC2	peripheral blood	CD19+/CD27+/IgA+ or IgG+									Yes	Beekman, 2018
MBC3	peripheral blood	CD19+/CD27+/IgA+ or IgG+								Yes		Kulis, 2015
MBC4	peripheral blood	CD19+/CD27+/IgA+ or IgG+							Yes			Beekman, 2018
MBC5	peripheral blood	CD19+/CD27+/IgA+ or IgG+							Yes			Beekman, 2018
MBC6	peripheral blood	CD19+/CD27+/IgA+ or IgG+							Yes			Beekman, 2018
MBC7	peripheral blood	CD19+/CD27+/IgA+ or IgG+	Yes	Yes	Yes	Yes	Yes	Yes				Beekman, 2018
MBC8	peripheral blood	CD19+/CD27+/IgA+ or IgG+	Yes	Yes	Yes	Yes	Yes	Yes				Beekman, 2018
MBC9	peripheral blood	CD19+/CD27+/IgA+ or IgG+									Yes	Beekman, 2018
MBC10	peripheral blood	CD19+/CD27+/IgA+ or IgG+									Yes	Beekman, 2018
MBC11	peripheral blood	CD19+/CD27+/IgA+ or IgG+								Yes		Kulis, 2015
MBC12	peripheral blood	CD19+/CD27+/IgA+ or IgG+								Yes		Kulis, 2015
MBC13	peripheral blood	CD19+/CD27+/IgA+ or IgG+							Yes			Beekman, 2018
MBC14	peripheral blood	CD19+/CD27+/IgA+ or IgG+							Yes			Beekman, 2018
MBC15	peripheral blood	CD19+/CD27+/IgA+ or IgG+							Yes			Beekman, 2018
t-PC1	tonsil	CD20lo/CD38hi	Yes	Yes	Yes	Yes	Yes	Yes				Beekman, 2018
t-PC2	tonsil	CD20lo/CD38hi	Yes	Yes	Yes	Yes	Yes	Yes		Yes	Yes	Beekman, 2018
t-PC3	tonsil	CD20lo/CD38hi	Yes	Yes	Yes	Yes	Yes	Yes			Yes	Beekman, 2018
t-PC4	tonsil	CD20lo/CD38hi									Yes	Beekman, 2018
t-PC5	tonsil	CD20lo/CD38hi								Yes		Beekman, 2018
t-PC6	tonsil	CD20lo/CD38hi								Yes		Beekman, 2018
t-PC7	tonsil	CD20lo/CD38hi							Yes			Beekman, 2018
t-PC8	tonsil	CD20lo/CD38hi							Yes			Beekman, 2018
t-PC9	tonsil	CD20lo/CD38hi							Yes			Beekman, 2018
bm-PC	bone marrow	CD3-/CD14-/CD15-/CD45+/CD38+/CD138+	Yes
Additional series of RNA-Seq
sample	source	selection markers	H3K27ac	H3K4me1	H3K4me3	H3K36me3	H3K9me3	H3K27me3	ATAC	WGBS	RNA-seq	Reference
t-NBC_A6.4	tonsil	CD20+/CD44+/CD27-									Yes	Agirre, 2019
t-NBC_A7.4	tonsil	CD20+/CD44+/CD27-									Yes	Agirre, 2019
t-NBC_122311	tonsil	CD20+/CD44+/CD27-									Yes	Agirre, 2019
t-NBC_RH.11.86	tonsil	CD20+/CD44+/CD27-									Yes	Agirre, 2019
t-NBC_RH.11.88	tonsil	CD20+/CD44+/CD27-									Yes	Agirre, 2019
GCBC_121611	tonsil	CD20+/CD10+/CD38med									Yes	Agirre, 2019
GCBC_122311	tonsil	CD20+/CD10+/CD38med									Yes	Agirre, 2019
GCBC_RH.11.86	tonsil	CD20+/CD10+/CD38med									Yes	Agirre, 2019
GCBC_RH.11.88	tonsil	CD20+/CD10+/CD38med									Yes	Agirre, 2019
MBC_A3.4	tonsil	CD20+/CD44+/CD27+/CD38low									Yes	Agirre, 2019
MBC_A4.4	tonsil	CD20+/CD44+/CD27+/CD38low									Yes	Agirre, 2019
MBC_A5.5	tonsil	CD20+/CD44+/CD27+/CD38low									Yes	Agirre, 2019
MBC_A6.5	tonsil	CD20+/CD44+/CD27+/CD38low									Yes	Agirre, 2019
MBC_A7.5	tonsil	CD20+/CD44+/CD27+/CD38low									Yes	Agirre, 2019
t-PC_41	tonsil	CD20+/CD44+/D27+/CD38high									Yes	Agirre, 2019
t-PC_A4.1	tonsil	CD20+/CD44+/D27+/CD38high									Yes	Agirre, 2019
t-PC_A5.1	tonsil	CD20+/CD44+/D27+/CD38high									Yes	Agirre, 2019
t-PC_A6.1	tonsil	CD20+/CD44+/D27+/CD38high									Yes	Agirre, 2019
t-PC_A7.1	tonsil	CD20+/CD44+/D27+/CD38high									Yes	Agirre, 2019
bm-PC_MO101	bone marrow	CD3-/CD14-/CD15-/CD45+/CD38+/CD138+									Yes	Agirre, 2019
bm-PC_MO98	bone marrow	CD3-/CD14-/CD15-/CD45+/CD38+/CD138+									Yes	Agirre, 2019
bm-PC_MO99	bone marrow	CD3-/CD14-/CD15-/CD45+/CD38+/CD138+									Yes	Agirre, 2019
MM48086	bone marrow	CD138+									Yes	in preparation
MM51078	bone marrow	CD138+									Yes	in preparation
MM52305	bone marrow	CD138+									Yes	in preparation
MM53225	bone marrow	CD138+									Yes	in preparation
MM54639	bone marrow	CD138+									Yes	in preparation
MM54647	bone marrow	CD138+									Yes	in preparation
MM54746	bone marrow	CD138+									Yes	in preparation
MM54847	bone marrow	CD138+									Yes	in preparation
MM55051	bone marrow	CD138+									Yes	in preparation
MM55138	bone marrow	CD138+									Yes	in preparation
MM55220	bone marrow	CD138+									Yes	in preparation
MM55282	bone marrow	CD138+									Yes	in preparation
MM55338	bone marrow	CD138+									Yes	in preparation
MM55389	bone marrow	CD138+									Yes	in preparation
MM55576	bone marrow	CD138+									Yes	in preparation
MM55624	bone marrow	CD138+									Yes	in preparation
MM55658	bone marrow	CD138+									Yes	in preparation
MM55706	bone marrow	CD138+									Yes	in preparation
MM56357	bone marrow	CD138+									Yes	in preparation
MM56417	bone marrow	CD138+									Yes	in preparation
MM56525	bone marrow	CD138+									Yes	in preparation
MM56605	bone marrow	CD138+									Yes	in preparation
MM56766	bone marrow	CD138+									Yes	in preparation
MM56878	bone marrow	CD138+									Yes	in preparation
MM56945	bone marrow	CD138+									Yes	in preparation
MM56965	bone marrow	CD138+									Yes	in preparation
MM57075	bone marrow	CD138+									Yes	in preparation
MM57224	bone marrow	CD138+									Yes	in preparation
MM57991	bone marrow	CD138+									Yes	in preparation
MM58089	bone marrow	CD138+									Yes	in preparation
MM58105	bone marrow	CD138+									Yes	in preparation
MM58166	bone marrow	CD138+									Yes	in preparation
MM58177	bone marrow	CD138+									Yes	in preparation
MM58183	bone marrow	CD138+									Yes	in preparation
MM58281	bone marrow	CD138+									Yes	in preparation
MM58410	bone marrow	CD138+									Yes	in preparation
MM58592	bone marrow	CD138+									Yes	in preparation
H929.R1	cell line	-									Yes	in preparation
H929.R2	cell line	-									Yes	in preparation
H929.R3	cell line	-									Yes	in preparation
H929.R4	cell line	-									Yes	in preparation
KMS11.R1	cell line	-									Yes	in preparation
KMS11.R2	cell line	-									Yes	in preparation
KMS11.R3	cell line	-									Yes	in preparation
MM1S.R1	cell line	-									Yes	in preparation
MM1S.R2	cell line	-									Yes	in preparation
MM1S.R3	cell line	-									Yes	in preparation
U266	cell line	-									Yes	in preparation
KMS11_shPRDM5_1i	cell line	-									Yes
KMS11_shPRDM5_1iD	cell line	-									Yes
KMS11_shPRDM5_2i	cell line	-									Yes
KMS11_shPRDM5_2iD	cell line	-									Yes
