# Supplementary material for: Chromatin activation as a unifying principle underlying pathogenic mechanisms in multiple myeloma
Source: Genome Res. 2020 Sep;30(9):1217–27. doi: 10.1101/gr.265520.120 (PMC7545147; doi:10.1101/gr.265520.120)
Supplement: Supplemental Material [file supp_gr.265520.120_Supplemental_Table_S2.xlsx]

## Sheet: Supp table patient data
Supplemental Table S2. Characterization of Multiple Myeloma (MM) patient samples. POS: positive; NEG: negative; NA: Not available.
	Sample	Diagnosis	Sex	Conventional cytogenetic analysis	Del(13q)	Amp(1q)	Del(1p)	TP53 FISH	IGH FISH	t(11;14) FISH	t(4;14) FISH	t(14;16) FISH	Hyperdiploid FISH
Epigenome	MM54168	MM	Female	46, XX [30]	NA	NEG	NEG	NEG	POS	NA	NEG	NEG	NEG
	MM54498	MM	Male	46, XY [30]	NA	NEG	NEG	NEG	NEG	NA	NA	NA	NEG
	MM54847	MM	Female	46, XX [30]	NA	NEG	NEG	NEG	POS	NA	NEG	NEG	NEG
	MM55358	MM	Female	46, XX [30]	NA	POS	NEG	NEG	NEG	NA	NA	NA	NEG
	MM26632	MM	Female	42,XX,der(1q),der(3q)t(3;?)(q?;?),-8,der(9p),-10,-11,-13,add(14)(q32),-15,-15,der(17p),-18,-20,-22,-22,+6mar [21]/46,XX [9]	NEG	NA	NA	NEG	NEG	NA	NA	NA	NEG
	MM26840	MM	Male	46, XY [30]	NA	NA	NA	NA	NA	NA	NA	NA	NA
	MM41737	MM	Male	46, XY [30]	NA	NA	NA	NA	NA	NA	NA	NA	NA
	MM42040	MM	Female	Null	POS	NA	NA	POS	NA	NA	NA	NA	POS
	MM58166	MM	Male	46, XY [30]	NA	NEG	NEG	NEG	NEG	NA	NA	NA	NEG
	MM58232	MM	Male	46, XY [30]	NA	NA	NA	NEG	POS	NA	NEG	NEG	NA
	MM58698	MM	Female	46, XX [30]	NA	NEG	NEG	NEG	NEG	NA	NA	NA	NEG
	MM58873	MM	Female	NA	NA	NEG	NEG	NEG	NEG	NA	NA	NA	NEG
	MM58928	MM	Male	46, XY [30]	NA	NEG	NEG	NEG	NEG	NA	NA	NA	NEG
	MM58977	MM	Male	49, XY, -1, +5, +der(7)t(1;7)(q21;p21), +9, del(13)(q12q?21), +15, der(16)t(1;16)(q31;q13), +19, add(20)(q13)[30]/46,XY[20]	NEG	POS	POS	NEG	NEG	NA	NA	NA	NEG
	MM59077	MM	Female	NA	NA	POS	NEG	NEG	POS	NA	NEG	NEG	NEG
	MM59300	MM	Male	46, XY [30]	NA	NA	NA	NA	NA	NA	NA	NA	NA
	MM54647	MM	Female	46, XX [30]	NA	NEG	NEG	NEG	NEG	NA	NA	NA	POS
	MM26302	MM	Male	46, XY [30]	NA	NA	NA	NA	NA	NA	NA	NA	NA
	MM35574	MM	Female	45, X, -Y [23]/ 46, XY [7]	NEG	NA	NA	NEG	NEG	NA	NA	NA	NEG
	MM35174	MM	Male	46, XY [30]	NEG	NA	NA	NEG	NEG	NA	NA	NA	POS
Additional series	MM48086	MM	Male	46, XY [30]	NA	NA	NA	NEG	POS	NEG	NEG	NA	NA
	MM51078	MM	Male	46, XY [30]	NEG	NEG	NEG	NEG	NEG	NA	NA	NA	NEG
	MM52305	MM	Female	Null	NA	NEG	NEG	NEG	NEG	NA	NA	NA	NA
	MM53225	MM	Male	46, XY [30]	NA	NEG	NEG	NEG	NEG	NA	NA	NA	NA
	MM54639	MM	Female	46, XX, 16qh+ [30]	NA	NEG	NEG	NEG	POS	NA	NEG	NEG	NA
	MM54647	MM	Female	46, XX [30]	NA	NEG	NEG	NEG	NEG	NA	NA	NA	NA
	MM54746	MM	Female	46, XX [30]	NA	NA	NA	NA	NA	NA	NA	NA	NA
	MM54847	MM	Female	46, XX [30]	NA	NEG	NEG	NEG	POS	NA	NEG	NEG	NA
	MM55051	MM	Male	46, XY [30]	NA	POS	NEG	NEG	POS	NA	NEG	NEG	NA
	MM55138	MM	Male	46, XY [30]	NA	NEG	NEG	NA	NA	NA	NA	NA	NA
	MM55220	MM	Male	46, XY [30]	NA	NA	NA	NA	NA	NA	NA	NA	NA
	MM55282	MM	Male	43, X, -Y, del(1)(p?22), -2, del(3)(q26), t(11;14)(q13;q32), -13, -14, +21, -22, +mar[45]/46,XY[5]	NA	POS	POS	NEG	POS	NA	NEG	NEG	NA
	MM55338	MM	Female	46, XX [30]	NA	NEG	NEG	NEG	NEG	NA	NA	NA	NA
	MM55389	MM	Male	46, XY [30]	NA	NEG	NEG	NEG	NEG	NA	NA	NA	NA
	MM55576	MM	Male	46, XY [30]	NA	POS	NEG	NEG	POS	NA	POS	NEG	NA
	MM55624	MM	Female	45, X, -X [9]/46, XX [21]	NA	POS	NEG	NEG	NEG	NA	NA	NA	NA
	MM55658	MM	Female	NA	NA	NEG	NEG	NEG	NA	NA	NEG	NEG	NA
	MM55706	MM	Male	46, XY [30]	NA	NEG	NEG	NEG	NEG	NA	NA	NA	NA
	MM56357	MM	Female	46, XX [30]	NA	NA	NA	NA	NA	NA	NA	NA	NA
	MM56417	MM	Male	46, XY [30]	NA	POS	NEG	NEG	POS	NA	NA	NA	NA
	MM56525	MM	Male	46, XY [30]	NA	NEG	NEG	NEG	NEG	NA	NA	NA	NA
	MM56605	MM	Male	46, XY [30]	NA	POS	NEG	NEG	POS	NA	NEG	NEG	NA
	MM56766	MM	Female	46, XX [30]	NA	NEG	NEG	NEG	NEG	NA	NA	NA	NA
	MM56878	MM	Male	45, X, -Y [24]/46, XY [6]	NA	NEG	NEG	NEG	NEG	NA	NA	NA	NA
	MM56945	MM	Male	45, XY,rob(13;14)(q10;q10)?c[30]	NA	POS	POS	POS	NA	NA	NEG	NEG	NA
	MM56965	MM	Female	46, XX [30]	NA	NEG	NEG	NEG	NEG	NA	NA	NA	NA
	MM57075	MM	Female	46, XX [30]	NA	NEG	NEG	NEG	NEG	NA	NA	NA	NA
	MM57224	MM	Female	46, XX [30]	NA	NEG	NEG	NEG	NEG	NA	NA	NA	NA
	MM57991	MM	Female	46, XX [30]	NA	NEG	NEG	NEG	NEG	NA	NA	NA	NA
	MM58089	MM	Male	NA	NA	NEG	NEG	NEG	NEG	NA	NA	NA	NA
	MM58105	MM	Male	46, XY [30]	NA	NA	NA	NA	NA	NA	NA	NA	NA
	MM58166	MM	Male	46, XY [30]	NA	NEG	NEG	NEG	NEG	NA	NA	NA	NA
	MM58177	MM	Female	46, XX,inv(9)(p12q13)?c[30]	NA	NEG	NEG	NEG	POS	NA	NEG	NEG	NA
	MM58183	MM	Female	46, XX [30]	NA	POS	POS	NEG	POS	NA	NEG	NEG	NA
	MM58281	MM	Female	NA	NA	POS	NEG	NEG	POS	NA	POS	NEG	NA
	MM58410	MM	Female	NA	NA	POS	NEG	NEG	POS	NA	NEG	NEG	NA
	MM58592	MM	Male	NA	NA	NA	NA	NA	NA	NA	NA	NA	NA
