# Supplementary material for: Chromatin activation as a unifying principle underlying pathogenic mechanisms in multiple myeloma
Source: Genome Res. 2020 Sep;30(9):1217–27. doi: 10.1101/gr.265520.120 (PMC7545147; doi:10.1101/gr.265520.120)
Supplement: Supplemental Material [file supp_gr.265520.120_Supplemental_Table_S3.xlsx]

## Sheet: All.de.novo.peaks_with.genes
Supplemental Table S3. List of de novo activated regions in MM with associated target genes.
Peak Mapinfo			PeakID	Target genes
Chr	start	end
chr1	4654149	4657784	chr1. 4654149. 4657784	AJAP1
chr1	6205117	6207249	chr1. 6205117. 6207249	ICMT,KLHL21
chr1	21790986	21792512	chr1. 21790986. 21792512	USP48
chr1	25599821	25601418	chr1. 25599821. 25601418	SEPN1,MAN1C1
chr1	27934710	27935629	chr1. 27934710. 27935629	XKR8,SESN2
chr1	28437526	28438556	chr1. 28437526. 28438556	SESN2
chr1	28598486	28600569	chr1. 28598486. 28600569	SESN2
chr1	28890324	28891594	chr1. 28890324. 28891594	SESN2
chr1	35880476	35882387	chr1. 35880476. 35882387	NCDN,C1orf216
chr1	37751923	37753668	chr1. 37751923. 37753668	GNL2
chr1	37837889	37842436	chr1. 37837889. 37842436	GNL2
chr1	39604937	39607038	chr1. 39604937. 39607038	OXCT2,BMP8A,BMP8B
chr1	39639116	39640334	chr1. 39639116. 39640334	OXCT2,BMP8A,BMP8B
chr1	43645311	43646522	chr1. 43645311. 43646522	SLC6A9,EBNA1BP2
chr1	43814023	43815685	chr1. 43814023. 43815685	SLC6A9,EBNA1BP2
chr1	43838148	43840500	chr1. 43838148. 43840500	SLC6A9,EBNA1BP2
chr1	43933017	43934952	chr1. 43933017. 43934952	SLC6A9,EBNA1BP2
chr1	45320802	45321977	chr1. 45320802. 45321977	MMACHC,PIK3R3,PTCH2
chr1	46659069	46660817	chr1. 46659069. 46660817	NSUN4,MOB3C,FAAH,ATPAF1
chr1	51296643	51297410	chr1. 51296643. 51297410	RNF11,OSBPL9
chr1	51330143	51331111	chr1. 51330143. 51331111	RNF11,OSBPL9
chr1	51887490	51888468	chr1. 51887490. 51888468	RAB3B,GPX7,ZFYVE9,COA7
chr1	51961012	51964896	chr1. 51961012. 51964896	RAB3B,GPX7,ZFYVE9,COA7
chr1	52096036	52096872	chr1. 52096036. 52096872	RAB3B,GPX7,ZFYVE9,COA7
chr1	52368149	52369214	chr1. 52368149. 52369214	RAB3B,GPX7,ZFYVE9,COA7
chr1	53915586	53917011	chr1. 53915586. 53917011	TMEM59
chr1	58873090	58877157	chr1. 58873090. 58877157	HOOK1
chr1	58896100	58897105	chr1. 58896100. 58897105	HOOK1
chr1	59150600	59151595	chr1. 59150600. 59151595	HOOK1
chr1	59327695	59329248	chr1. 59327695. 59329248	HOOK1
chr1	59759236	59759575	chr1. 59759236. 59759575	HOOK1
chr1	64826181	64828636	chr1. 64826181. 64828636	RAVER2
chr1	65703100	65706031	chr1. 65703100. 65706031	LEPR
chr1	65762000	65763194	chr1. 65762000. 65763194	LEPR
chr1	65810808	65814293	chr1. 65810808. 65814293	LEPR
chr1	67652014	67654096	chr1. 67652014. 67654096	GADD45A
chr1	67711349	67714930	chr1. 67711349. 67714930	GADD45A
chr1	67721558	67723078	chr1. 67721558. 67723078	GADD45A
chr1	67747758	67751086	chr1. 67747758. 67751086	GADD45A
chr1	74824555	74825337	chr1. 74824555. 74825337	TYW3,SLC44A5
chr1	81548542	81550079	chr1. 81548542. 81550079	LPHN2,TTLL7
chr1	81679749	81682849	chr1. 81679749. 81682849	LPHN2,TTLL7
chr1	82151648	82154193	chr1. 82151648. 82154193	LPHN2,TTLL7
chr1	82979697	82982218	chr1. 82979697. 82982218	LPHN2,TTLL7
chr1	84362997	84363938	chr1. 84362997. 84363938	TTLL7
chr1	85989954	85992057	chr1. 85989954. 85992057	COL24A1
chr1	85992128	85993677	chr1. 85992128. 85993677	COL24A1
chr1	86501743	86504563	chr1. 86501743. 86504563	SH3GLB1
chr1	87150539	87153010	chr1. 87150539. 87153010	LMO4
chr1	87409504	87413024	chr1. 87409504. 87413024	LMO4
chr1	87462333	87465270	chr1. 87462333. 87465270	LMO4
chr1	87743922	87744994	chr1. 87743922. 87744994	LMO4
chr1	92475389	92477259	chr1. 92475389. 92477259	GFI1
chr1	97137991	97139059	chr1. 97137991. 97139059	DPYD
chr1	97313966	97315832	chr1. 97313966. 97315832	DPYD
chr1	97460483	97464107	chr1. 97460483. 97464107	DPYD
chr1	97863804	97865363	chr1. 97863804. 97865363	DPYD
chr1	99757181	99758773	chr1. 99757181. 99758773	FRRS1
chr1	99992596	99993844	chr1. 99992596. 99993844	FRRS1
chr1	100364380	100365654	chr1.100364380.100365654	FRRS1
chr1	100386656	100389183	chr1.100386656.100389183	FRRS1
chr1	101344636	101345312	chr1.101344636.101345312	EXTL2
chr1	109388933	109395162	chr1.109388933.109395162	GSTM3,SORT1
chr1	109395323	109398827	chr1.109395323.109398827	GSTM3,SORT1
chr1	109667552	109668816	chr1.109667552.109668816	GSTM3,SORT1
chr1	113429554	113430343	chr1.113429554.113430343	MAGI3
chr1	114692779	114698019	chr1.114692779.114698019	DENND2C
chr1	114700899	114704428	chr1.114700899.114704428	DENND2C
chr1	117339438	117340743	chr1.117339438.117340743	GDAP2,MAN1A2
chr1	117570092	117573793	chr1.117570092.117573793	GDAP2,MAN1A2
chr1	117593739	117595213	chr1.117593739.117595213	GDAP2,MAN1A2
chr1	117680708	117685004	chr1.117680708.117685004	GDAP2,MAN1A2
chr1	117752150	117761859	chr1.117752150.117761859	GDAP2,MAN1A2
chr1	119647228	119648889	chr1.119647228.119648889	ZNF697
chr1	119675323	119675756	chr1.119675323.119675756	ZNF697
chr1	147539931	147543625	chr1.147539931.147543625	BCL9,BCL9
chr1	147543808	147546877	chr1.147543808.147546877	BCL9,BCL9
chr1	147640993	147641620	chr1.147640993.147641620	BCL9,BCL9
chr1	149937412	149938751	chr1.149937412.149938751	BOLA1,OTUD7B
chr1	151477734	151479559	chr1.151477734.151479559	TUFT1,THEM4,SNX27
chr1	153531572	153534476	chr1.153531572.153534476	S100A6
chr1	154351660	154354715	chr1.154351660.154354715	SHC1,IL6R,DPM3,KCNN3
chr1	154747523	154748742	chr1.154747523.154748742	SHC1,IL6R,DPM3,KCNN3
chr1	154791245	154793120	chr1.154791245.154793120	SHC1,IL6R,DPM3,KCNN3
chr1	154805932	154808068	chr1.154805932.154808068	SHC1,IL6R,DPM3,KCNN3
chr1	155296813	155298049	chr1.155296813.155298049	THBS3,UBQLN4
chr1	156122006	156124510	chr1.156122006.156124510	THBS3,UBQLN4
chr1	156124515	156125560	chr1.156124515.156125560	THBS3,UBQLN4
chr1	156125704	156127403	chr1.156125704.156127403	THBS3,UBQLN4
chr1	157181170	157182308	chr1.157181170.157182308	PIGM,CD5L
chr1	157363536	157364690	chr1.157363536.157364690	PIGM,CD5L
chr1	157516558	157520175	chr1.157516558.157520175	PIGM,CD5L
chr1	157855040	157857414	chr1.157855040.157857414	PIGM,CD5L
chr1	158997782	158999091	chr1.158997782.158999091	PIGM,CD5L
chr1	160725157	160728884	chr1.160725157.160728884	DCAF8,NCSTN,F11R,TSTD1
chr1	161524810	161525343	chr1.161524810.161525343	FCGR2B,ATF6
chr1	162068945	162071197	chr1.162068945.162071197	UAP1,ATF6,DDR2
chr1	162586572	162589049	chr1.162586572.162589049	UAP1,ATF6,DDR2
chr1	162612333	162614251	chr1.162612333.162614251	UAP1,ATF6,DDR2
chr1	162626083	162627828	chr1.162626083.162627828	UAP1,ATF6,DDR2
chr1	162629006	162636056	chr1.162629006.162636056	UAP1,ATF6,DDR2
chr1	165424117	165424943	chr1.165424117.165424943	MGST3
chr1	165752694	165756446	chr1.165752694.165756446	MGST3,UCK2,TMCO1
chr1	166998693	166999851	chr1.166998693.166999851	CREG1,POGK,POU2F1
chr1	167276652	167277818	chr1.167276652.167277818	CREG1,POGK,POU2F1
chr1	174225034	174227171	chr1.174225034.174227171	SUCO
chr1	178972598	178974320	chr1.178972598.178974320	ABL2
chr1	179206542	179207527	chr1.179206542.179207527	ABL2
chr1	180769962	180771224	chr1.180769962.180771224	XPR1
chr1	180853564	180856256	chr1.180853564.180856256	XPR1
chr1	182962709	182963217	chr1.182962709.182963217	LAMC1
chr1	183122087	183124583	chr1.183122087.183124583	LAMC1
chr1	183956847	183957513	chr1.183956847.183957513	TSEN15,EDEM3,C1orf21
chr1	186456216	186457537	chr1.186456216.186457537	OCLM,PTGS2,C1orf27,PLA2G4A
chr1	186626174	186627541	chr1.186626174.186627541	OCLM,PTGS2,C1orf27,PLA2G4A
chr1	186679677	186681738	chr1.186679677.186681738	OCLM,PTGS2,C1orf27,PLA2G4A
chr1	186767929	186769849	chr1.186767929.186769849	OCLM,PTGS2,C1orf27,PLA2G4A
chr1	186798536	186806368	chr1.186798536.186806368	OCLM,PTGS2,C1orf27,PLA2G4A
chr1	187051835	187052353	chr1.187051835.187052353	UCHL5,GLRX2,CDC73
chr1	187269821	187271272	chr1.187269821.187271272	UCHL5,GLRX2,CDC73
chr1	189149116	189154805	chr1.189149116.189154805	UCHL5,GLRX2,CDC73
chr1	189178973	189180862	chr1.189178973.189180862	UCHL5,GLRX2,CDC73
chr1	192529538	192531174	chr1.192529538.192531174	UCHL5,GLRX2,CDC73
chr1	193110501	193112887	chr1.193110501.193112887	UCHL5,GLRX2,CDC73
chr1	194084170	194085695	chr1.194084170.194085695	UCHL5,GLRX2,CDC73
chr1	194150676	194151729	chr1.194150676.194151729	UCHL5,GLRX2,CDC73
chr1	194467770	194468608	chr1.194467770.194468608	UCHL5,GLRX2,CDC73
chr1	194600236	194601292	chr1.194600236.194601292	UCHL5,GLRX2,CDC73
chr1	194705261	194705890	chr1.194705261.194705890	UCHL5,GLRX2,CDC73
chr1	195070875	195072698	chr1.195070875.195072698	UCHL5,GLRX2,CDC73
chr1	195195047	195196718	chr1.195195047.195196718	UCHL5,GLRX2,CDC73
chr1	195593818	195594806	chr1.195593818.195594806	UCHL5,GLRX2,CDC73
chr1	196216735	196218103	chr1.196216735.196218103	UCHL5,GLRX2,CDC73
chr1	196271118	196272335	chr1.196271118.196272335	UCHL5,GLRX2,CDC73
chr1	197781140	197784514	chr1.197781140.197784514	DENND1B,NEK7
chr1	197806327	197809847	chr1.197806327.197809847	DENND1B,NEK7
chr1	199066969	199068581	chr1.199066969.199068581	DENND1B,NEK7
chr1	199081407	199082518	chr1.199081407.199082518	DENND1B,NEK7
chr1	199173274	199174403	chr1.199173274.199174403	DENND1B,NEK7
chr1	200780286	200781854	chr1.200780286.200781854	TMEM9,CAMSAP2
chr1	200865910	200868107	chr1.200865910.200868107	TMEM9,CAMSAP2
chr1	200890602	200897603	chr1.200890602.200897603	TMEM9,CAMSAP2
chr1	201479881	201481349	chr1.201479881.201481349	CSRP1,ADIPOR1,CYB5R1,LRRN2,NAV1,PPP1R12B
chr1	201481499	201484996	chr1.201481499.201484996	CSRP1,ADIPOR1,CYB5R1,LRRN2,NAV1,PPP1R12B
chr1	201715214	201716506	chr1.201715214.201716506	CSRP1,ADIPOR1,CYB5R1,LRRN2,NAV1,PPP1R12B
chr1	201756055	201759214	chr1.201756055.201759214	CSRP1,ADIPOR1,CYB5R1,LRRN2,NAV1,PPP1R12B
chr1	201763188	201765358	chr1.201763188.201765358	CSRP1,ADIPOR1,CYB5R1,LRRN2,NAV1,PPP1R12B
chr1	204677147	204688201	chr1.204677147.204688201	CSRP1,ADIPOR1,CYB5R1,LRRN2,NAV1,PPP1R12B
chr1	204690646	204693672	chr1.204690646.204693672	CSRP1,ADIPOR1,CYB5R1,LRRN2,NAV1,PPP1R12B
chr1	204702816	204708264	chr1.204702816.204708264	CSRP1,ADIPOR1,CYB5R1,LRRN2,NAV1,PPP1R12B
chr1	206689904	206691442	chr1.206689904.206691442	MAPKAPK2
chr1	206691581	206694293	chr1.206691581.206694293	MAPKAPK2
chr1	207058001	207060591	chr1.207058001.207060591	YOD1
chr1	211391186	211392758	chr1.211391186.211392758	SLC30A1
chr1	212612465	212615488	chr1.212612465.212615488	RPS6KC1
chr1	212665371	212665900	chr1.212665371.212665900	RPS6KC1
chr1	212730395	212732113	chr1.212730395.212732113	RPS6KC1
chr1	213081793	213083978	chr1.213081793.213083978	RPS6KC1
chr1	213244687	213246629	chr1.213244687.213246629	RPS6KC1
chr1	216221293	216221881	chr1.216221293.216221881	GPATCH2,ESRRG
chr1	216527366	216532335	chr1.216527366.216532335	GPATCH2,ESRRG
chr1	216720081	216724323	chr1.216720081.216724323	GPATCH2,ESRRG
chr1	216764504	216767800	chr1.216764504.216767800	GPATCH2,ESRRG
chr1	217025904	217028070	chr1.217025904.217028070	GPATCH2,ESRRG
chr1	217075961	217079113	chr1.217075961.217079113	GPATCH2,ESRRG
chr1	217089212	217090617	chr1.217089212.217090617	GPATCH2,ESRRG
chr1	217368266	217370350	chr1.217368266.217370350	GPATCH2,ESRRG
chr1	217661003	217662169	chr1.217661003.217662169	GPATCH2,ESRRG
chr1	217672723	217675096	chr1.217672723.217675096	GPATCH2,ESRRG
chr1	218459138	218460922	chr1.218459138.218460922	TGFB2
chr1	219122930	219125313	chr1.219122930.219125313	TGFB2
chr1	219158883	219160845	chr1.219158883.219160845	TGFB2
chr1	223142592	223144730	chr1.223142592.223144730	CAPN2
chr1	223732616	223735390	chr1.223732616.223735390	CAPN2
chr1	223849109	223850126	chr1.223849109.223850126	CAPN2
chr1	225539369	225540668	chr1.225539369.225540668	TMEM63A,ENAH,EPHX1
chr1	228111631	228113117	chr1.228111631.228113117	SNAP47,RNF187
chr1	229338045	229338992	chr1.229338045.229338992	CCSAP
chr1	229367825	229369558	chr1.229367825.229369558	CCSAP
chr1	231781203	231782353	chr1.231781203.231782353	DISC1
chr1	244409286	244411086	chr1.244409286.244411086	ADSS
chr1	247215917	247216910	chr1.247215917.247216910	ZNF496
chr2	6943817	6946466	chr2. 6943817. 6946466	RNF144A
chr2	8277597	8279348	chr2. 8277597. 8279348	ID2,RNF144A
chr2	8487515	8489492	chr2. 8487515. 8489492	ID2,RNF144A
chr2	8605794	8607001	chr2. 8605794. 8607001	ID2,RNF144A
chr2	8677932	8679981	chr2. 8677932. 8679981	ID2,RNF144A
chr2	8684479	8685938	chr2. 8684479. 8685938	ID2,RNF144A
chr2	9963938	9968906	chr2. 9963938. 9968906	KLF11,GRHL1
chr2	10432024	10432899	chr2. 10432024. 10432899	KLF11,GRHL1
chr2	11497915	11501545	chr2. 11497915. 11501545	E2F6
chr2	20102769	20106243	chr2. 20102769. 20106243	LAPTM4A
chr2	26411835	26412836	chr2. 26411835. 26412836	SLC35F6,RAB10
chr2	27152210	27155450	chr2. 27152210. 27155450	OST4,CCDC121,SLC35F6,ATRAID,SUPT7L
chr2	27156638	27157725	chr2. 27156638. 27157725	OST4,CCDC121,SLC35F6,ATRAID,SUPT7L
chr2	27161248	27163657	chr2. 27161248. 27163657	OST4,CCDC121,SLC35F6,ATRAID,SUPT7L
chr2	27169808	27171252	chr2. 27169808. 27171252	OST4,CCDC121,SLC35F6,ATRAID,SUPT7L
chr2	32834504	32835684	chr2. 32834504. 32835684	FAM98A,LTBP1
chr2	32903822	32906838	chr2. 32903822. 32906838	FAM98A,LTBP1
chr2	32916136	32916629	chr2. 32916136. 32916629	FAM98A,LTBP1
chr2	32983933	32984869	chr2. 32983933. 32984869	FAM98A,LTBP1
chr2	32985463	32987967	chr2. 32985463. 32987967	FAM98A,LTBP1
chr2	33085647	33087731	chr2. 33085647. 33087731	FAM98A,LTBP1
chr2	33094224	33095473	chr2. 33094224. 33095473	FAM98A,LTBP1
chr2	33320574	33322469	chr2. 33320574. 33322469	FAM98A,LTBP1
chr2	33382704	33385385	chr2. 33382704. 33385385	FAM98A,LTBP1
chr2	33418874	33420663	chr2. 33418874. 33420663	FAM98A,LTBP1
chr2	38651942	38653100	chr2. 38651942. 38653100	HNRNPLL,QPCT
chr2	38681281	38683479	chr2. 38681281. 38683479	HNRNPLL,QPCT
chr2	39407231	39409937	chr2. 39407231. 39409937	MAP4K3
chr2	39919492	39921322	chr2. 39919492. 39921322	SLC8A1
chr2	40027752	40030445	chr2. 40027752. 40030445	SLC8A1
chr2	40100223	40103524	chr2. 40100223. 40103524	SLC8A1
chr2	40119888	40127169	chr2. 40119888. 40127169	SLC8A1
chr2	40130226	40134052	chr2. 40130226. 40134052	SLC8A1
chr2	40158625	40165801	chr2. 40158625. 40165801	SLC8A1
chr2	40177778	40179699	chr2. 40177778. 40179699	SLC8A1
chr2	40289928	40291791	chr2. 40289928. 40291791	SLC8A1
chr2	40404364	40405272	chr2. 40404364. 40405272	SLC8A1
chr2	40449808	40452653	chr2. 40449808. 40452653	SLC8A1
chr2	41714914	41715599	chr2. 41714914. 41715599	SLC8A1
chr2	44615604	44618474	chr2. 44615604. 44618474	PREPL
chr2	45465966	45467539	chr2. 45465966. 45467539	PREPL
chr2	46345900	46348830	chr2. 46345900. 46348830	CRIPT,EPAS1,RHOQ,ATP6V1E2,MCFD2
chr2	47320545	47322792	chr2. 47320545. 47322792	MCFD2
chr2	50143837	50144504	chr2. 50143837. 50144504	GPR75-ASB3,GPR75-ASB3,NRXN1
chr2	50834545	50836054	chr2. 50834545. 50836054	GPR75-ASB3,GPR75-ASB3,NRXN1
chr2	50862563	50866261	chr2. 50862563. 50866261	GPR75-ASB3,GPR75-ASB3,NRXN1
chr2	50874333	50882839	chr2. 50874333. 50882839	GPR75-ASB3,GPR75-ASB3,NRXN1
chr2	51012549	51014496	chr2. 51012549. 51014496	GPR75-ASB3,GPR75-ASB3,NRXN1
chr2	51510366	51512424	chr2. 51510366. 51512424	GPR75-ASB3,GPR75-ASB3,NRXN1
chr2	52717478	52718204	chr2. 52717478. 52718204	GPR75-ASB3,GPR75-ASB3,NRXN1
chr2	52763757	52764846	chr2. 52763757. 52764846	GPR75-ASB3,GPR75-ASB3,NRXN1
chr2	52934141	52935905	chr2. 52934141. 52935905	GPR75-ASB3,GPR75-ASB3,NRXN1
chr2	54766889	54769281	chr2. 54766889. 54769281	CHAC2,CFAP36,PNPT1,GPR75-ASB3,GPR75-ASB3,RTN4
chr2	55053604	55055503	chr2. 55053604. 55055503	CHAC2,CFAP36,PNPT1,GPR75-ASB3,GPR75-ASB3,RTN4
chr2	55063122	55064461	chr2. 55063122. 55064461	CHAC2,CFAP36,PNPT1,GPR75-ASB3,GPR75-ASB3,RTN4
chr2	55118163	55121143	chr2. 55118163. 55121143	CHAC2,CFAP36,PNPT1,GPR75-ASB3,GPR75-ASB3,RTN4
chr2	55158969	55159693	chr2. 55158969. 55159693	CHAC2,CFAP36,PNPT1,GPR75-ASB3,GPR75-ASB3,RTN4
chr2	55291552	55293140	chr2. 55291552. 55293140	CHAC2,CFAP36,PNPT1,GPR75-ASB3,GPR75-ASB3,RTN4
chr2	57754881	57756725	chr2. 57754881. 57756725	VRK2
chr2	57758911	57760661	chr2. 57758911. 57760661	VRK2
chr2	58568570	58570492	chr2. 58568570. 58570492	VRK2
chr2	60676762	60680573	chr2. 60676762. 60680573	FAM161A
chr2	62505457	62506775	chr2. 62505457. 62506775	EHBP1,VPS54
chr2	63627387	63629441	chr2. 63627387. 63629441	EHBP1,VPS54
chr2	64053561	64055357	chr2. 64053561. 64055357	LGALSL,PELI1,VPS54
chr2	64165732	64168629	chr2. 64165732. 64168629	LGALSL,PELI1,VPS54
chr2	64188553	64191255	chr2. 64188553. 64191255	LGALSL,PELI1,VPS54
chr2	64270778	64279002	chr2. 64270778. 64279002	LGALSL,PELI1,VPS54
chr2	64311967	64312999	chr2. 64311967. 64312999	LGALSL,PELI1,VPS54
chr2	64723534	64725019	chr2. 64723534. 64725019	LGALSL,PELI1,VPS54
chr2	70552210	70554799	chr2. 70552210. 70554799	TGFA
chr2	72887005	72888022	chr2. 72887005. 72888022	RAB11FIP5
chr2	80528504	80533623	chr2. 80528504. 80533623	CTNNA2
chr2	80735527	80738518	chr2. 80735527. 80738518	CTNNA2
chr2	80829832	80832320	chr2. 80829832. 80832320	CTNNA2
chr2	81077120	81078610	chr2. 81077120. 81078610	CTNNA2
chr2	81213583	81214345	chr2. 81213583. 81214345	CTNNA2
chr2	84797746	84800872	chr2. 84797746. 84800872	SUCLG1,TRABD2A
chr2	85924364	85925249	chr2. 85924364. 85925249	ST3GAL5
chr2	96231134	96235483	chr2. 96231134. 96235483	TMEM127
chr2	98449355	98453076	chr2. 98449355. 98453076	EIF5B
chr2	98467965	98469528	chr2. 98467965. 98469528	EIF5B
chr2	98513162	98516151	chr2. 98513162. 98516151	EIF5B
chr2	101043512	101044908	chr2.101043512.101044908	RNF149,TBC1D8
chr2	109634788	109639971	chr2.109634788.109639971	SOWAHC,SEPT10
chr2	109642875	109645415	chr2.109642875.109645415	SOWAHC,SEPT10
chr2	110816059	110817784	chr2.110816059.110817784	ACOXL
chr2	110863492	110866777	chr2.110863492.110866777	ACOXL
chr2	110946428	110947887	chr2.110946428.110947887	ACOXL
chr2	111070814	111072293	chr2.111070814.111072293	ACOXL
chr2	111099138	111102528	chr2.111099138.111102528	ACOXL
chr2	111897286	111902089	chr2.111897286.111902089	ZC3H6
chr2	111902181	111911546	chr2.111902181.111911546	ZC3H6
chr2	111929790	111932282	chr2.111929790.111932282	ZC3H6
chr2	111932374	111934475	chr2.111932374.111934475	ZC3H6
chr2	111971111	111974299	chr2.111971111.111974299	ZC3H6
chr2	112993922	112997742	chr2.112993922.112997742	IL36A
chr2	127904878	127905693	chr2.127904878.127905693	SAP130
chr2	134975047	134977339	chr2.134975047.134977339	UBXN4
chr2	135023602	135024786	chr2.135023602.135024786	UBXN4
chr2	135099628	135101046	chr2.135099628.135101046	UBXN4
chr2	147287805	147290107	chr2.147287805.147290107	ACVR2A
chr2	147364241	147365137	chr2.147364241.147365137	ACVR2A
chr2	147887953	147889581	chr2.147887953.147889581	ACVR2A
chr2	149037571	149040423	chr2.149037571.149040423	LYPD6B
chr2	150391290	150392740	chr2.150391290.150392740	RND3
chr2	150402110	150404994	chr2.150402110.150404994	RND3
chr2	156022930	156023748	chr2.156022930.156023748	GPD2
chr2	157788622	157791366	chr2.157788622.157791366	ACVR1C,ACVR1,PKP4
chr2	158967617	158970469	chr2.158967617.158970469	TANC1,CD302,BAZ2B
chr2	159488348	159489975	chr2.159488348.159489975	TANC1,CD302,BAZ2B
chr2	160344233	160346793	chr2.160344233.160346793	RBMS1
chr2	160353297	160356741	chr2.160353297.160356741	RBMS1
chr2	160363158	160371999	chr2.160363158.160371999	RBMS1
chr2	160490440	160494681	chr2.160490440.160494681	RBMS1
chr2	160665725	160668627	chr2.160665725.160668627	RBMS1
chr2	160693549	160696718	chr2.160693549.160696718	RBMS1
chr2	160939582	160942351	chr2.160939582.160942351	RBMS1
chr2	162327285	162329307	chr2.162327285.162329307	PSMD14,IFIH1
chr2	164801449	164802697	chr2.164801449.164802697	GALNT3
chr2	164825550	164827449	chr2.164825550.164827449	GALNT3
chr2	165274205	165276246	chr2.165274205.165276246	GALNT3
chr2	170179003	170181105	chr2.170179003.170181105	METTL5,UBR3
chr2	170201300	170202886	chr2.170201300.170202886	METTL5,UBR3
chr2	170226581	170228355	chr2.170226581.170228355	METTL5,UBR3
chr2	171333476	171335566	chr2.171333476.171335566	CYBRD1,TLK1
chr2	172503341	172505517	chr2.172503341.172505517	RAPGEF4
chr2	172674120	172675850	chr2.172674120.172675850	RAPGEF4
chr2	172735105	172737066	chr2.172735105.172737066	RAPGEF4,RAPGEF4
chr2	172810711	172811997	chr2.172810711.172811997	RAPGEF4
chr2	172984865	172986278	chr2.172984865.172986278	RAPGEF4
chr2	175141734	175143357	chr2.175141734.175143357	KIAA1715,MTX2,NFE2L2,AGPS
chr2	176932064	176933125	chr2.176932064.176933125	KIAA1715,MTX2,NFE2L2,AGPS
chr2	177168741	177171250	chr2.177168741.177171250	KIAA1715,MTX2,NFE2L2,AGPS
chr2	177289367	177291163	chr2.177289367.177291163	KIAA1715,MTX2,NFE2L2,AGPS
chr2	181991134	181992313	chr2.181991134.181992313	SSFA2
chr2	182886314	182889739	chr2.182886314.182889739	FRZB,NCKAP1
chr2	182956251	182959088	chr2.182956251.182959088	FRZB,NCKAP1
chr2	183995714	184002080	chr2.183995714.184002080	ZNF804A
chr2	184443620	184445685	chr2.184443620.184445685	ZNF804A
chr2	184462821	184464123	chr2.184462821.184464123	ZNF804A
chr2	185638162	185639839	chr2.185638162.185639839	FAM171B,ITGAV
chr2	186693613	186694858	chr2.186693613.186694858	FAM171B,ITGAV
chr2	186913031	186914671	chr2.186913031.186914671	CALCRL
chr2	186946546	186948779	chr2.186946546.186948779	CALCRL
chr2	186950357	186952706	chr2.186950357.186952706	CALCRL
chr2	186967058	186969409	chr2.186967058.186969409	CALCRL
chr2	187050401	187053464	chr2.187050401.187053464	CALCRL
chr2	187074693	187076499	chr2.187074693.187076499	CALCRL
chr2	187553179	187555117	chr2.187553179.187555117	WDR75,SLC40A1,GULP1
chr2	189580005	189581797	chr2.189580005.189581797	WDR75,SLC40A1,GULP1
chr2	189790504	189792454	chr2.189790504.189792454	INPP1,C2orf88,MFSD6,STAT1,STAT4,PMS1
chr2	189917178	189917814	chr2.189917178.189917814	INPP1,C2orf88,MFSD6,STAT1,STAT4,PMS1
chr2	190456724	190460950	chr2.190456724.190460950	INPP1,C2orf88,MFSD6,STAT1,STAT4,PMS1
chr2	191204048	191205133	chr2.191204048.191205133	STAT4,MYO1B
chr2	197697516	197698977	chr2.197697516.197698977	MARS2
chr2	197785802	197787002	chr2.197785802.197787002	PLCL1
chr2	197803224	197808004	chr2.197803224.197808004	PLCL1
chr2	197836716	197841011	chr2.197836716.197841011	PLCL1
chr2	198004113	198008971	chr2.198004113.198008971	PLCL1
chr2	198911998	198916006	chr2.198911998.198916006	PLCL1
chr2	198972917	198974937	chr2.198972917.198974937	PLCL1
chr2	199186147	199186894	chr2.199186147.199186894	PLCL1
chr2	200021126	200023102	chr2.200021126.200023102	CLK1,C2orf69,SPATS2L
chr2	200305867	200309184	chr2.200305867.200309184	CLK1,C2orf69,SPATS2L
chr2	200372049	200374714	chr2.200372049.200374714	CLK1,C2orf69,SPATS2L
chr2	200421987	200425855	chr2.200421987.200425855	CLK1,C2orf69,SPATS2L
chr2	200616142	200618190	chr2.200616142.200618190	CLK1,C2orf69,SPATS2L
chr2	201075584	201076526	chr2.201075584.201076526	FAM126B
chr2	201174876	201177006	chr2.201174876.201177006	FAM126B
chr2	201909448	201910523	chr2.201909448.201910523	FZD7,ALS2
chr2	202002468	202004643	chr2.202002468.202004643	FZD7,ALS2
chr2	202005372	202008732	chr2.202005372.202008732	FZD7,ALS2
chr2	202030800	202037849	chr2.202030800.202037849	FZD7,ALS2
chr2	202143481	202145622	chr2.202143481.202145622	FZD7,ALS2
chr2	202259786	202260599	chr2.202259786.202260599	BMPR2
chr2	202385855	202387182	chr2.202385855.202387182	BMPR2
chr2	203673403	203674994	chr2.203673403.203674994	CD28
chr2	203688150	203692170	chr2.203688150.203692170	CD28
chr2	214678777	214680284	chr2.214678777.214680284	FN1
chr2	214682745	214684289	chr2.214682745.214684289	FN1
chr2	215830714	215832136	chr2.215830714.215832136	FN1
chr2	215840321	215841834	chr2.215840321.215841834	FN1
chr2	215900279	215901869	chr2.215900279.215901869	FN1
chr2	215917937	215918803	chr2.215917937.215918803	FN1
chr2	239200789	239202245	chr2.239200789.239202245	MYEOV2
chr2	239285107	239285938	chr2.239285107.239285938	MYEOV2
chr2	241514972	241516412	chr2.241514972.241516412	SEPT2,ING5
chr3	557432	558937	chr3. 557432. 558937	IL5RA,TRNT1
chr3	1528512	1529444	chr3. 1528512. 1529444	IL5RA,TRNT1
chr3	1531900	1534656	chr3. 1531900. 1534656	IL5RA,TRNT1
chr3	1943117	1944079	chr3. 1943117. 1944079	IL5RA,TRNT1
chr3	2978329	2980322	chr3. 2978329. 2980322	IL5RA,TRNT1
chr3	3051951	3055595	chr3. 3051951. 3055595	IL5RA,TRNT1
chr3	3096239	3099717	chr3. 3096239. 3099717	IL5RA,TRNT1
chr3	3100562	3103735	chr3. 3100562. 3103735	IL5RA,TRNT1
chr3	3665271	3667999	chr3. 3665271. 3667999	LRRN1,SUMF1
chr3	13281299	13283725	chr3. 13281299. 13283725	TSEN2,RAF1,CHCHD4,TMEM43,XPC,MKRN2,FBLN2
chr3	15401310	15403277	chr3. 15401310. 15403277	BTD
chr3	31447495	31450446	chr3. 31447495. 31450446	STT3B,GPD1L
chr3	32090970	32092527	chr3. 32090970. 32092527	STT3B,GPD1L
chr3	33745351	33747847	chr3. 33745351. 33747847	CRTAP,GPD1L
chr3	38453085	38456473	chr3. 38453085. 38456473	ACVR2B,GOLGA4
chr3	43279027	43280395	chr3. 43279027. 43280395	ANO10
chr3	44126647	44130932	chr3. 44126647. 44130932	ANO10
chr3	45602104	45602931	chr3. 45602104. 45602931	CCR2,LZTFL1
chr3	45602964	45608732	chr3. 45602964. 45608732	CCR2,LZTFL1
chr3	45617041	45619016	chr3. 45617041. 45619016	CCR2,LZTFL1
chr3	45655078	45658676	chr3. 45655078. 45658676	CCR2,LZTFL1
chr3	45860251	45862500	chr3. 45860251. 45862500	CCR2,LZTFL1
chr3	46026858	46028293	chr3. 46026858. 46028293	CCR2,LZTFL1
chr3	46288356	46290598	chr3. 46288356. 46290598	CCR2,LZTFL1
chr3	46292009	46295440	chr3. 46292009. 46295440	CCR2,LZTFL1
chr3	46296779	46301781	chr3. 46296779. 46301781	CCR2,LZTFL1
chr3	46357945	46362926	chr3. 46357945. 46362926	CCR2,LZTFL1
chr3	46488939	46489940	chr3. 46488939. 46489940	CCR2,LZTFL1
chr3	49214801	49216066	chr3. 49214801. 49216066	ARIH2OS,IFRD2,NAT6,SLC25A20
chr3	49553522	49554926	chr3. 49553522. 49554926	ARIH2OS,IFRD2,NAT6,SLC25A20
chr3	50950003	50951406	chr3. 50950003. 50951406	PARP3,PCBP4,NPRL2,CISH,MAPKAPK3,TEX264,DOCK3
chr3	51024154	51026144	chr3. 51024154. 51026144	PARP3,PCBP4,NPRL2,CISH,MAPKAPK3,TEX264,DOCK3
chr3	52444794	52446331	chr3. 52444794. 52446331	PCBP4,ABHD14A,PHF7
chr3	55480886	55490548	chr3. 55480886. 55490548	WNT5A,ERC2
chr3	56423230	56425533	chr3. 56423230. 56425533	CCDC66,ERC2
chr3	56724645	56726108	chr3. 56724645. 56726108	ARHGEF3,SLMAP
chr3	59387852	59389796	chr3. 59387852. 59389796	PTPRG
chr3	60399534	60404896	chr3. 60399534. 60404896	PTPRG
chr3	61560029	61564689	chr3. 61560029. 61564689	PTPRG
chr3	61635890	61639048	chr3. 61635890. 61639048	PTPRG
chr3	61667511	61671035	chr3. 61667511. 61671035	PTPRG
chr3	61813668	61815688	chr3. 61813668. 61815688	PTPRG
chr3	64194809	64197369	chr3. 64194809. 64197369	PRICKLE2
chr3	67030022	67032542	chr3. 67030022. 67032542	EOGT,SUCLG2
chr3	71710127	71711080	chr3. 71710127. 71711080	RYBP,EIF4E3
chr3	72268434	72271961	chr3. 72268434. 72271961	RYBP,EIF4E3
chr3	81469848	81471460	chr3. 81469848. 81471460	GBE1
chr3	81484769	81486398	chr3. 81484769. 81486398	GBE1
chr3	83229630	83234148	chr3. 83229630. 83234148	GBE1
chr3	95356246	95358942	chr3. 95356246. 95358942	EPHA6
chr3	96717967	96721330	chr3. 96717967. 96721330	EPHA6
chr3	96811659	96817409	chr3. 96811659. 96817409	EPHA6
chr3	97894822	97896367	chr3. 97894822. 97896367	MINA,ARL6,CRYBG3,EPHA6
chr3	98611992	98614065	chr3. 98611992. 98614065	ST3GAL6,CPOX
chr3	98641493	98643945	chr3. 98641493. 98643945	ST3GAL6,CPOX
chr3	98650960	98652709	chr3. 98650960. 98652709	ST3GAL6,CPOX
chr3	98709511	98711365	chr3. 98709511. 98711365	ST3GAL6,CPOX
chr3	98718350	98719841	chr3. 98718350. 98719841	ST3GAL6,CPOX
chr3	98729259	98740903	chr3. 98729259. 98740903	ST3GAL6,CPOX
chr3	98743108	98746721	chr3. 98743108. 98746721	ST3GAL6,CPOX
chr3	98760550	98777761	chr3. 98760550. 98777761	ST3GAL6,CPOX
chr3	100209153	100212113	chr3.100209153.100212113	CMSS1,TBC1D23
chr3	100465462	100466987	chr3.100465462.100466987	NIT2,TFG,TBC1D23,TOMM70A,LNP1,TMEM45A
chr3	100537216	100538738	chr3.100537216.100538738	NIT2,TFG,TBC1D23,TOMM70A,LNP1,TMEM45A
chr3	101099840	101100890	chr3.101099840.101100890	NIT2,TFG,TBC1D23,TOMM70A,LNP1,TMEM45A
chr3	101133534	101135409	chr3.101133534.101135409	NIT2,TFG,TBC1D23,TOMM70A,LNP1,TMEM45A
chr3	101376886	101378509	chr3.101376886.101378509	NIT2,TFG,TBC1D23,TOMM70A,LNP1,TMEM45A
chr3	101807743	101808808	chr3.101807743.101808808	NFKBIZ
chr3	106628447	106631251	chr3.106628447.106631251	ALCAM
chr3	109068687	109073677	chr3.109068687.109073677	TRAT1,MORC1
chr3	110732723	110734101	chr3.110732723.110734101	PVRL3
chr3	112983907	112985155	chr3.112983907.112985155	SLC35A5,CCDC80,GTPBP8,C3orf17
chr3	113051015	113052637	chr3.113051015.113052637	CFAP44
chr3	113150915	113154363	chr3.113150915.113154363	CFAP44
chr3	113210813	113213776	chr3.113210813.113213776	CFAP44
chr3	113545724	113547149	chr3.113545724.113547149	CFAP44,SPICE1,GRAMD1C
chr3	113896565	113899308	chr3.113896565.113899308	CFAP44,SPICE1,GRAMD1C
chr3	114702925	114708387	chr3.114702925.114708387	ZBTB20,LSAMP
chr3	114745904	114747608	chr3.114745904.114747608	ZBTB20,LSAMP
chr3	114809096	114811232	chr3.114809096.114811232	ZBTB20,LSAMP
chr3	115097409	115102006	chr3.115097409.115102006	ZBTB20,LSAMP
chr3	117598996	117602468	chr3.117598996.117602468	IGSF11,LSAMP
chr3	117628237	117631627	chr3.117628237.117631627	IGSF11,LSAMP
chr3	117632110	117634914	chr3.117632110.117634914	IGSF11,LSAMP
chr3	118526511	118529169	chr3.118526511.118529169	IGSF11,LSAMP
chr3	118809544	118811157	chr3.118809544.118811157	IGSF11,LSAMP
chr3	119943737	119944987	chr3.119943737.119944987	NDUFB4,LRRC58,FSTL1
chr3	122029601	122031900	chr3.122029601.122031900	GOLGB1,FAM162A
chr3	122482544	122484336	chr3.122482544.122484336	GOLGB1,FAM162A
chr3	129053494	129054077	chr3.129053494.129054077	CNBP
chr3	129058572	129059729	chr3.129058572.129059729	CNBP
chr3	129323043	129325300	chr3.129323043.129325300	TMCC1
chr3	132444264	132444928	chr3.132444264.132444928	UBA5,NPHP3
chr3	132448095	132449199	chr3.132448095.132449199	UBA5,NPHP3
chr3	133546611	133548748	chr3.133546611.133548748	CDV3
chr3	136817740	136820570	chr3.136817740.136820570	STAG1,SLC35G2
chr3	140753058	140759522	chr3.140753058.140759522	SLC25A36,PXYLP1
chr3	140842334	140847693	chr3.140842334.140847693	SLC25A36,PXYLP1
chr3	141302986	141304669	chr3.141302986.141304669	PXYLP1,ZBTB38,GK5,XRN1
chr3	142944021	142945933	chr3.142944021.142945933	U2SURP
chr3	146159094	146162138	chr3.146159094.146162138	PLOD2
chr3	147945946	147946661	chr3.147945946.147946661	PLOD2
chr3	148839052	148842225	chr3.148839052.148842225	PLOD2
chr3	149247733	149249198	chr3.149247733.149249198	GYG1,HLTF,CP
chr3	150074167	150075259	chr3.150074167.150075259	PFN2
chr3	153399052	153401110	chr3.153399052.153401110	RAP2B
chr3	153576772	153578171	chr3.153576772.153578171	RAP2B
chr3	156605583	156607547	chr3.156605583.156607547	SSR3,TIPARP,CCNL1
chr3	156667638	156669143	chr3.156667638.156669143	SSR3,TIPARP,CCNL1
chr3	158350734	158351767	chr3.158350734.158351767	MLF1,RSRC1
chr3	158355422	158356796	chr3.158355422.158356796	MLF1,RSRC1
chr3	159852365	159854014	chr3.159852365.159854014	IL12A
chr3	170277709	170278887	chr3.170277709.170278887	GPR160,PRKCI
chr3	170300562	170302897	chr3.170300562.170302897	GPR160,PRKCI
chr3	177705806	177707186	chr3.177705806.177707186	KCNMB2
chr3	177741656	177743340	chr3.177741656.177743340	KCNMB2
chr3	177927434	177928975	chr3.177927434.177928975	KCNMB2
chr3	178082353	178087509	chr3.178082353.178087509	KCNMB2
chr3	178289032	178290458	chr3.178289032.178290458	KCNMB2
chr3	178517884	178519916	chr3.178517884.178519916	KCNMB2,KCNMB2
chr3	178714328	178716481	chr3.178714328.178716481	KCNMB2,KCNMB2
chr3	178767398	178769626	chr3.178767398.178769626	KCNMB2,KCNMB2
chr3	178825226	178827532	chr3.178825226.178827532	KCNMB2,KCNMB2
chr3	180571402	180573003	chr3.180571402.180573003	CCDC39
chr3	180677997	180680545	chr3.180677997.180680545	CCDC39
chr3	181838216	181840886	chr3.181838216.181840886	CCDC39
chr3	182391873	182394823	chr3.182391873.182394823	CCDC39
chr3	182712303	182715801	chr3.182712303.182715801	CCDC39
chr3	182715944	182718091	chr3.182715944.182718091	CCDC39
chr3	182729429	182731103	chr3.182729429.182731103	CCDC39
chr3	183116366	183116820	chr3.183116366.183116820	LAMP3,MCCC1
chr3	184319205	184320940	chr3.184319205.184320940	ALG3
chr3	184884426	184885590	chr3.184884426.184885590	TMEM41A,MAP3K13
chr3	185216034	185216977	chr3.185216034.185216977	TMEM41A,MAP3K13
chr3	186066966	186068284	chr3.186066966.186068284	ETV5
chr3	186079695	186081099	chr3.186079695.186081099	ETV5
chr3	190101004	190102037	chr3.190101004.190102037	P3H2
chr3	190168521	190170335	chr3.190168521.190170335	P3H2
chr3	192041667	192043568	chr3.192041667.192043568	MB21D2
chr4	13654197	13654827	chr4. 13654197. 13654827	CPEB2
chr4	13656684	13657614	chr4. 13656684. 13657614	CPEB2
chr4	13920351	13925025	chr4. 13920351. 13925025	CPEB2
chr4	14152516	14158352	chr4. 14152516. 14158352	CPEB2
chr4	17206285	17208733	chr4. 17206285. 17208733	QDPR
chr4	22848333	22853464	chr4. 22848333. 22853464	PPARGC1A
chr4	22854567	22855967	chr4. 22854567. 22855967	PPARGC1A
chr4	22874443	22877472	chr4. 22874443. 22877472	PPARGC1A
chr4	23291260	23292666	chr4. 23291260. 23292666	PPARGC1A
chr4	23333100	23336763	chr4. 23333100. 23336763	PPARGC1A
chr4	23888370	23891661	chr4. 23888370. 23891661	PPARGC1A
chr4	23971532	23973911	chr4. 23971532. 23973911	PPARGC1A
chr4	37682459	37683761	chr4. 37682459. 37683761	RELL1
chr4	38309161	38311447	chr4. 38309161. 38311447	KLF3
chr4	38523626	38524465	chr4. 38523626. 38524465	KLF3
chr4	38914709	38915656	chr4. 38914709. 38915656	WDR19
chr4	39036193	39038724	chr4. 39036193. 39038724	WDR19
chr4	39134067	39135494	chr4. 39134067. 39135494	WDR19
chr4	52700439	52701942	chr4. 52700439. 52701942	USP46,SCFD2
chr4	52747336	52749803	chr4. 52747336. 52749803	USP46,SCFD2
chr4	54439722	54440103	chr4. 54439722. 54440103	KIT
chr4	54656855	54660322	chr4. 54656855. 54660322	KIT
chr4	55552995	55554226	chr4. 55552995. 55554226	SRD5A3,TMEM165,CLOCK
chr4	56544754	56545328	chr4. 56544754. 56545328	PPAT
chr4	68358841	68360339	chr4. 68358841. 68360339	UGT2B17
chr4	68375554	68376958	chr4. 68375554. 68376958	UGT2B17
chr4	68493539	68496056	chr4. 68493539. 68496056	UGT2B17
chr4	68552089	68554636	chr4. 68552089. 68554636	UGT2B17
chr4	68655840	68658262	chr4. 68655840. 68658262	UGT2B17
chr4	74700100	74701104	chr4. 74700100. 74701104	MTHFD2L
chr4	76299848	76303341	chr4. 76299848. 76303341	SCARB2
chr4	76305625	76308038	chr4. 76305625. 76308038	SCARB2
chr4	76896942	76898756	chr4. 76896942. 76898756	SCARB2
chr4	87235674	87236573	chr4. 87235674. 87236573	PKD2
chr4	87677118	87678276	chr4. 87677118. 87678276	PKD2
chr4	88098629	88100372	chr4. 88098629. 88100372	PKD2
chr4	88866064	88869255	chr4. 88866064. 88869255	NAP1L5,TIGD2,FAM13A
chr4	88879987	88881549	chr4. 88879987. 88881549	NAP1L5,TIGD2,FAM13A
chr4	89100613	89102239	chr4. 89100613. 89102239	NAP1L5,TIGD2,FAM13A
chr4	94533438	94535900	chr4. 94533438. 94535900	PDLIM5
chr4	101353916	101357724	chr4.101353916.101357724	SLC39A8
chr4	103158288	103159236	chr4.103158288.103159236	CISD2,SLC39A8
chr4	104327149	104327812	chr4.104327149.104327812	CXXC4,PPA2,ARHGEF38
chr4	104424530	104425420	chr4.104424530.104425420	CXXC4,PPA2,ARHGEF38
chr4	104486332	104496367	chr4.104486332.104496367	CXXC4,PPA2,ARHGEF38
chr4	104519355	104521080	chr4.104519355.104521080	CXXC4,PPA2,ARHGEF38
chr4	104868807	104869582	chr4.104868807.104869582	CXXC4,PPA2,ARHGEF38
chr4	105460913	105462046	chr4.105460913.105462046	CXXC4,PPA2,ARHGEF38
chr4	105551367	105553923	chr4.105551367.105553923	CXXC4,PPA2,ARHGEF38
chr4	105624316	105625902	chr4.105624316.105625902	CXXC4,PPA2,ARHGEF38
chr4	105632541	105635358	chr4.105632541.105635358	CXXC4,PPA2,ARHGEF38
chr4	105636844	105638504	chr4.105636844.105638504	CXXC4,PPA2,ARHGEF38
chr4	119284089	119286075	chr4.119284089.119286075	PDE5A
chr4	119626620	119629600	chr4.119626620.119629600	PDE5A
chr4	119662378	119665058	chr4.119662378.119665058	PDE5A
chr4	120445320	120446849	chr4.120445320.120446849	NDNF,PRDM5
chr4	120517749	120518786	chr4.120517749.120518786	NDNF,PRDM5
chr4	120718731	120721688	chr4.120718731.120721688	NDNF,PRDM5
chr4	120733049	120736297	chr4.120733049.120736297	NDNF,PRDM5
chr4	120765108	120766520	chr4.120765108.120766520	NDNF,PRDM5
chr4	120813435	120817588	chr4.120813435.120817588	NDNF,PRDM5
chr4	120853807	120858059	chr4.120853807.120858059	NDNF,PRDM5
chr4	120874299	120876296	chr4.120874299.120876296	NDNF,PRDM5
chr4	120918636	120925615	chr4.120918636.120925615	NDNF,PRDM5
chr4	121067387	121074963	chr4.121067387.121074963	NDNF,PRDM5
chr4	121181305	121182864	chr4.121181305.121182864	NDNF,PRDM5
chr4	121950403	121952760	chr4.121950403.121952760	FGF2,NUDT6
chr4	121977015	121979837	chr4.121977015.121979837	FGF2,NUDT6
chr4	122826249	122829642	chr4.122826249.122829642	FGF2,NUDT6
chr4	122910947	122912415	chr4.122910947.122912415	FGF2,NUDT6
chr4	124947647	124948357	chr4.124947647.124948357	ANKRD50
chr4	124958176	124959308	chr4.124958176.124959308	ANKRD50
chr4	125313760	125316783	chr4.125313760.125316783	FAT4
chr4	125975636	125976446	chr4.125975636.125976446	FAT4
chr4	125985206	125985954	chr4.125985206.125985954	FAT4
chr4	137530848	137534301	chr4.137530848.137534301	PCDH18,SLC7A11
chr4	140661435	140663097	chr4.140661435.140663097	ELMOD2
chr4	143667623	143670181	chr4.143667623.143670181	SMARCA5
chr4	145481018	145489335	chr4.145481018.145489335	ABCE1,SMAD1
chr4	145520912	145522015	chr4.145520912.145522015	ABCE1,SMAD1
chr4	145523654	145526795	chr4.145523654.145526795	ABCE1,SMAD1
chr4	145550806	145553706	chr4.145550806.145553706	ABCE1,SMAD1
chr4	151911095	151913626	chr4.151911095.151913626	FAM160A1,FBXW7
chr4	152408395	152410501	chr4.152408395.152410501	FAM160A1,FBXW7
chr4	152576842	152579634	chr4.152576842.152579634	FBXW7
chr4	152600493	152601824	chr4.152600493.152601824	FBXW7
chr4	152709828	152710870	chr4.152709828.152710870	FBXW7
chr4	156191897	156194685	chr4.156191897.156194685	CTSO
chr4	156328481	156332805	chr4.156328481.156332805	CTSO
chr4	158808304	158812894	chr4.158808304.158812894	C4orf46,ETFDH,FNIP2,RAPGEF2
chr4	158929596	158930862	chr4.158929596.158930862	C4orf46,ETFDH,FNIP2,RAPGEF2
chr4	159150324	159152442	chr4.159150324.159152442	C4orf46,ETFDH,FNIP2,RAPGEF2
chr4	159177157	159180770	chr4.159177157.159180770	C4orf46,ETFDH,FNIP2,RAPGEF2
chr4	169983972	169992343	chr4.169983972.169992343	MFAP3L
chr4	170006557	170009059	chr4.170006557.170009059	MFAP3L
chr4	176122721	176125432	chr4.176122721.176125432	SPCS3,WDR17
chr4	176133850	176135794	chr4.176133850.176135794	SPCS3,WDR17
chr4	176236804	176238229	chr4.176236804.176238229	SPCS3,WDR17
chr4	176362495	176364885	chr4.176362495.176364885	SPCS3,WDR17
chr4	176375878	176377908	chr4.176375878.176377908	SPCS3,WDR17
chr4	177109763	177110559	chr4.177109763.177110559	VEGFC
chr4	181308518	181309969	chr4.181308518.181309969	DCTD
chr4	182417697	182418987	chr4.182417697.182418987	DCTD
chr4	185257652	185258964	chr4.185257652.185258964	LRP2BP,CFAP97
chr4	185534391	185536584	chr4.185534391.185536584	PDLIM3,CCDC110,FAM149A,SORBS2
chr4	185540272	185542315	chr4.185540272.185542315	PDLIM3,CCDC110,FAM149A,SORBS2
chr4	185591024	185593865	chr4.185591024.185593865	PDLIM3,CCDC110,FAM149A,SORBS2
chr4	186160168	186162776	chr4.186160168.186162776	PDLIM3,CCDC110,FAM149A,SORBS2
chr5	5417823	5420224	chr5. 5417823. 5420224	ICE1
chr5	5611734	5614585	chr5. 5611734. 5614585	ICE1,UBE2QL1
chr5	5657867	5660570	chr5. 5657867. 5660570	ICE1,UBE2QL1
chr5	5783653	5785411	chr5. 5783653. 5785411	ICE1,UBE2QL1
chr5	6448511	6454440	chr5. 6448511. 6454440	ICE1,UBE2QL1
chr5	9545446	9547091	chr5. 9545446. 9547091	FAM173B
chr5	36073212	36078055	chr5. 36073212. 36078055	LMBRD2,NADK2
chr5	36163560	36165334	chr5. 36163560. 36165334	LMBRD2,NADK2
chr5	36301177	36302989	chr5. 36301177. 36302989	LMBRD2,NADK2
chr5	41874133	41875532	chr5. 41874133. 41875532	FBXO4,SEPP1
chr5	42810642	42812655	chr5. 42810642. 42812655	FBXO4,SEPP1
chr5	53244782	53247281	chr5. 53244782. 53247281	NDUFS4
chr5	54468530	54470762	chr5. 54468530. 54470762	NDUFS4
chr5	54540900	54543417	chr5. 54540900. 54543417	SNX18
chr5	54742666	54744933	chr5. 54742666. 54744933	SNX18
chr5	54902522	54904089	chr5. 54902522. 54904089	SNX18
chr5	56010619	56013232	chr5. 56010619. 56013232	IL6ST
chr5	56050094	56051375	chr5. 56050094. 56051375	IL6ST
chr5	56056596	56057160	chr5. 56056596. 56057160	IL6ST
chr5	56070559	56072612	chr5. 56070559. 56072612	IL6ST
chr5	56080334	56081382	chr5. 56080334. 56081382	IL6ST
chr5	56105115	56106378	chr5. 56105115. 56106378	IL6ST
chr5	56127432	56128644	chr5. 56127432. 56128644	IL6ST
chr5	56147334	56149711	chr5. 56147334. 56149711	IL6ST
chr5	56151969	56153523	chr5. 56151969. 56153523	IL6ST
chr5	56174855	56176274	chr5. 56174855. 56176274	IL6ST
chr5	57494372	57496115	chr5. 57494372. 57496115	PLK2
chr5	61306100	61307821	chr5. 61306100. 61307821	ERCC8,NDUFAF2,ZSWIM6,ELOVL7
chr5	62783005	62784351	chr5. 62783005. 62784351	IPO11
chr5	69211237	69213253	chr5. 69211237. 69213253	SLC30A5,MARVELD2,OCLN
chr5	69432036	69433148	chr5. 69432036. 69433148	SLC30A5,MARVELD2,OCLN
chr5	72951337	72952326	chr5. 72951337. 72952326	TMEM171,FCHO2
chr5	76519814	76523040	chr5. 76519814. 76523040	F2R,SV2C,IQGAP2
chr5	76637731	76639315	chr5. 76637731. 76639315	F2R,SV2C,IQGAP2
chr5	79133179	79134349	chr5. 79133179. 79134349	MTX3,JMY,HOMER1
chr5	79415538	79417304	chr5. 79415538. 79417304	MTX3,JMY,HOMER1
chr5	79935071	79936553	chr5. 79935071. 79936553	MTX3,JMY,HOMER1
chr5	80487308	80488861	chr5. 80487308. 80488861	MTX3,JMY,HOMER1
chr5	81787559	81788844	chr5. 81787559. 81788844	ATG10
chr5	82880546	82883740	chr5. 82880546. 82883740	TMEM167A,XRCC4,VCAN
chr5	82984052	82986291	chr5. 82984052. 82986291	TMEM167A,XRCC4,VCAN
chr5	90639900	90642077	chr5. 90639900. 90642077	MBLAC2
chr5	95725902	95729494	chr5. 95725902. 95729494	RHOBTB3,GLRX,CAST
chr5	95858391	95863972	chr5. 95858391. 95863972	RHOBTB3,GLRX,CAST
chr5	95882913	95885756	chr5. 95882913. 95885756	RHOBTB3,GLRX,CAST
chr5	95915495	95919792	chr5. 95915495. 95919792	RHOBTB3,GLRX,CAST
chr5	96627489	96628497	chr5. 96627489. 96628497	RHOBTB3,GLRX,CAST
chr5	100516164	100519151	chr5.100516164.100519151	FAM174A
chr5	100647223	100648376	chr5.100647223.100648376	FAM174A
chr5	100731544	100732273	chr5.100731544.100732273	FAM174A
chr5	100789697	100791248	chr5.100789697.100791248	FAM174A
chr5	100803310	100804395	chr5.100803310.100804395	FAM174A
chr5	100825441	100826771	chr5.100825441.100826771	FAM174A
chr5	102595567	102596828	chr5.102595567.102596828	PPIP5K2,PAM
chr5	103271107	103274118	chr5.103271107.103274118	C5orf30
chr5	103444337	103445025	chr5.103444337.103445025	C5orf30
chr5	104177569	104179267	chr5.104177569.104179267	NUDT12
chr5	104361086	104364763	chr5.104361086.104364763	NUDT12
chr5	104451918	104453773	chr5.104451918.104453773	NUDT12
chr5	106126714	106129161	chr5.106126714.106129161	NUDT12
chr5	106680119	106680901	chr5.106680119.106680901	NUDT12
chr5	108641663	108642522	chr5.108641663.108642522	PJA2,FER
chr5	108681128	108682320	chr5.108681128.108682320	PJA2,FER
chr5	108857733	108859560	chr5.108857733.108859560	PJA2,FER
chr5	108924444	108925742	chr5.108924444.108925742	PJA2,FER
chr5	109247805	109249985	chr5.109247805.109249985	PJA2,FER
chr5	109449576	109451601	chr5.109449576.109451601	PJA2,FER
chr5	109699972	109702319	chr5.109699972.109702319	MAN2A1
chr5	109936004	109937888	chr5.109936004.109937888	MAN2A1
chr5	110107309	110108233	chr5.110107309.110108233	MAN2A1
chr5	112346143	112348550	chr5.112346143.112348550	REEP5,EPB41L4A
chr5	112348583	112349999	chr5.112348583.112349999	REEP5,EPB41L4A
chr5	113250007	113254283	chr5.113250007.113254283	MCC
chr5	113292301	113296103	chr5.113292301.113296103	MCC
chr5	115327859	115330259	chr5.115327859.115330259	CCDC112,FEM1C
chr5	115857763	115858882	chr5.115857763.115858882	CCDC112,FEM1C
chr5	123526929	123528527	chr5.123526929.123528527	SNX24
chr5	129067623	129069890	chr5.129067623.129069890	ISOC1,CHSY3
chr5	129903127	129907150	chr5.129903127.129907150	ISOC1,CHSY3
chr5	130111034	130112970	chr5.130111034.130112970	ISOC1,CHSY3
chr5	132628118	132630184	chr5.132628118.132630184	IRF1,GDF9,KIF3A,SLC22A5,RAD50,SEPT8
chr5	132662925	132664113	chr5.132662925.132664113	IRF1,GDF9,KIF3A,SLC22A5,RAD50,SEPT8
chr5	132746649	132748139	chr5.132746649.132748139	IRF1,GDF9,KIF3A,SLC22A5,RAD50,SEPT8
chr5	139480651	139483337	chr5.139480651.139483337	SPATA24,SLC23A1,TMEM173,MATR3,MATR3
chr5	140036800	140044425	chr5.140036800.140044425	IGIP,NRG2,PURA
chr5	141187127	141187479	chr5.141187127.141187479	PCDHGB2,PCDHGB3,PCDHGA6,PCDHGB6,PCDHGA10,PCDHGB7,PCDHGA11
chr5	142015394	142016643	chr5.142015394.142016643	GNPDA1,NDFIP1
chr5	148851222	148855697	chr5.148851222.148855697	ADRB2
chr5	148926709	148928884	chr5.148926709.148928884	ADRB2
chr5	151686282	151687615	chr5.151686282.151687615	SPARC,ATOX1
chr5	151701852	151704750	chr5.151701852.151704750	SPARC,ATOX1
chr5	160745496	160752146	chr5.160745496.160752146	CCNG1,ATP10B
chr5	173624377	173627581	chr5.173624377.173627581	CPEB4
chr5	173906735	173910683	chr5.173906735.173910683	CPEB4
chr5	173927867	173929897	chr5.173927867.173929897	CPEB4
chr6	251099	254331	chr6. 251099. 254331	DUSP22
chr6	380608	383499	chr6. 380608. 383499	DUSP22
chr6	6930988	6931854	chr6. 6930988. 6931854	SSR1
chr6	7161010	7162193	chr6. 7161010. 7162193	SSR1
chr6	7725565	7731713	chr6. 7725565. 7731713	BMP6
chr6	7973962	7979448	chr6. 7973962. 7979448	BMP6
chr6	7991086	7993137	chr6. 7991086. 7993137	BMP6
chr6	11712692	11715616	chr6. 11712692. 11715616	EDN1
chr6	11769099	11771721	chr6. 11769099. 11771721	EDN1
chr6	11784971	11787246	chr6. 11784971. 11787246	EDN1
chr6	11876303	11878406	chr6. 11876303. 11878406	EDN1
chr6	11899726	11901917	chr6. 11899726. 11901917	EDN1
chr6	12233606	12234199	chr6. 12233606. 12234199	EDN1
chr6	12318564	12321038	chr6. 12318564. 12321038	EDN1
chr6	16517567	16520731	chr6. 16517567. 16520731	GMPR,ATXN1
chr6	16667090	16671363	chr6. 16667090. 16671363	GMPR,ATXN1
chr6	16730645	16732761	chr6. 16730645. 16732761	GMPR,ATXN1
chr6	16736574	16737692	chr6. 16736574. 16737692	GMPR,ATXN1
chr6	16835870	16837166	chr6. 16835870. 16837166	GMPR,ATXN1
chr6	22954060	22956284	chr6. 22954060. 22956284	MBOAT1
chr6	25375986	25380166	chr6. 25375986. 25380166	LRRC16A
chr6	25489142	25490672	chr6. 25489142. 25490672	LRRC16A
chr6	26295377	26296160	chr6. 26295377. 26296160	HIST1H1T
chr6	31189804	31191249	chr6. 31189804. 31191249	PPP1R10
chr6	36616523	36619440	chr6. 36616523. 36619440	CDKN1A,PPIL1,C6orf89
chr6	36626513	36628245	chr6. 36626513. 36628245	CDKN1A,PPIL1,C6orf89
chr6	36650104	36652117	chr6. 36650104. 36652117	CDKN1A,PPIL1,C6orf89
chr6	36661896	36663583	chr6. 36661896. 36663583	CDKN1A,PPIL1,C6orf89
chr6	37060863	37062183	chr6. 37060863. 37062183	CDKN1A,PPIL1,C6orf89
chr6	37136807	37138348	chr6. 37136807. 37138348	CDKN1A,PPIL1,C6orf89
chr6	39430593	39432107	chr6. 39430593. 39432107	MOCS1,DAAM2
chr6	39563571	39566283	chr6. 39563571. 39566283	MOCS1,DAAM2
chr6	39695832	39699762	chr6. 39695832. 39699762	MOCS1,DAAM2
chr6	39933325	39934823	chr6. 39933325. 39934823	MOCS1,DAAM2
chr6	44524513	44526154	chr6. 44524513. 44526154	CLIC5,SUPT3H
chr6	44662091	44663763	chr6. 44662091. 44663763	CLIC5,SUPT3H
chr6	44975747	44978332	chr6. 44975747. 44978332	CLIC5,SUPT3H
chr6	45556173	45557352	chr6. 45556173. 45557352	CLIC5,SUPT3H
chr6	45737135	45738489	chr6. 45737135. 45738489	CLIC5,SUPT3H
chr6	48194640	48195426	chr6. 48194640. 48195426	MUT
chr6	56688143	56690766	chr6. 56688143. 56690766	DST
chr6	56765537	56769211	chr6. 56765537. 56769211	DST
chr6	56807267	56809739	chr6. 56807267. 56809739	DST
chr6	56809799	56812393	chr6. 56809799. 56812393	DST
chr6	56813436	56815997	chr6. 56813436. 56815997	DST
chr6	56838234	56844635	chr6. 56838234. 56844635	DST
chr6	68633484	68642007	chr6. 68633484. 68642007	BAI3
chr6	72182203	72183243	chr6. 72182203. 72183243	RIMS1
chr6	72635024	72637289	chr6. 72635024. 72637289	RIMS1
chr6	72824482	72825839	chr6. 72824482. 72825839	RIMS1
chr6	73389848	73390297	chr6. 73389848. 73390297	RIMS1,SLC17A5,DDX43
chr6	77368601	77369219	chr6. 77368601. 77369219	MYO6
chr6	77466080	77466951	chr6. 77466080. 77466951	MYO6
chr6	77473679	77475090	chr6. 77473679. 77475090	MYO6
chr6	77649730	77651291	chr6. 77649730. 77651291	MYO6
chr6	77819564	77821090	chr6. 77819564. 77821090	MYO6
chr6	79513007	79513797	chr6. 79513007. 79513797	HMGN3,LCA5,SH3BGRL2
chr6	79613469	79615614	chr6. 79613469. 79615614	HMGN3,LCA5,SH3BGRL2
chr6	82066210	82067833	chr6. 82066210. 82067833	BCKDHB
chr6	82142763	82146373	chr6. 82142763. 82146373	BCKDHB
chr6	82566904	82569903	chr6. 82566904. 82569903	TPBG,UBE3D
chr6	83086145	83087895	chr6. 83086145. 83087895	TPBG,UBE3D
chr6	83430138	83431954	chr6. 83430138. 83431954	ME1
chr6	87573063	87573654	chr6. 87573063. 87573654	SLC35A1
chr6	87644918	87645864	chr6. 87644918. 87645864	SLC35A1
chr6	87928976	87930738	chr6. 87928976. 87930738	SLC35A1
chr6	87979360	87980985	chr6. 87979360. 87980985	SLC35A1
chr6	88873871	88875145	chr6. 88873871. 88875145	SLC35A1
chr6	89097528	89099183	chr6. 89097528. 89099183	PM20D2,GABRR2,RRAGD,ANKRD6
chr6	89242023	89245385	chr6. 89242023. 89245385	PM20D2,GABRR2,RRAGD,ANKRD6
chr6	89367833	89370338	chr6. 89367833. 89370338	PM20D2,GABRR2,RRAGD,ANKRD6
chr6	96802611	96803708	chr6. 96802611. 96803708	UFL1,GPR63
chr6	96835461	96838116	chr6. 96835461. 96838116	UFL1,GPR63
chr6	96885336	96885821	chr6. 96885336. 96885821	UFL1,GPR63
chr6	100664484	100665736	chr6.100664484.100665736	ASCC3
chr6	105488527	105490800	chr6.105488527.105490800	PREP
chr6	105598970	105603468	chr6.105598970.105603468	PREP
chr6	106124518	106127312	chr6.106124518.106127312	PREP
chr6	106128798	106130761	chr6.106128798.106130761	PREP
chr6	106271701	106275404	chr6.106271701.106275404	PREP
chr6	108035951	108037393	chr6.108035951.108037393	CEP57L1,SEC63,OSTM1,ARMC2,SESN1
chr6	108541274	108544012	chr6.108541274.108544012	CEP57L1,SEC63,OSTM1,ARMC2,SESN1
chr6	108607596	108610024	chr6.108607596.108610024	CEP57L1,SEC63,OSTM1,ARMC2,SESN1
chr6	108616842	108623839	chr6.108616842.108623839	CEP57L1,SEC63,OSTM1,ARMC2,SESN1
chr6	108626798	108629625	chr6.108626798.108629625	CEP57L1,SEC63,OSTM1,ARMC2,SESN1
chr6	108636252	108640381	chr6.108636252.108640381	CEP57L1,SEC63,OSTM1,ARMC2,SESN1
chr6	108688429	108693124	chr6.108688429.108693124	CEP57L1,SEC63,OSTM1,ARMC2,SESN1
chr6	108738144	108739702	chr6.108738144.108739702	CEP57L1,SEC63,OSTM1,ARMC2,SESN1
chr6	108767496	108770409	chr6.108767496.108770409	CEP57L1,SEC63,OSTM1,ARMC2,SESN1
chr6	108778329	108784783	chr6.108778329.108784783	CEP57L1,SEC63,OSTM1,ARMC2,SESN1
chr6	108797261	108799382	chr6.108797261.108799382	CEP57L1,SEC63,OSTM1,ARMC2,SESN1
chr6	108800488	108802969	chr6.108800488.108802969	CEP57L1,SEC63,OSTM1,ARMC2,SESN1
chr6	108835516	108838845	chr6.108835516.108838845	CEP57L1,SEC63,OSTM1,ARMC2,SESN1
chr6	108865338	108866826	chr6.108865338.108866826	CEP57L1,SEC63,OSTM1,ARMC2,SESN1
chr6	108894941	108901050	chr6.108894941.108901050	CEP57L1,SEC63,OSTM1,ARMC2,SESN1
chr6	108954796	108956731	chr6.108954796.108956731	CEP57L1,SEC63,OSTM1,ARMC2,SESN1
chr6	109120005	109121898	chr6.109120005.109121898	CEP57L1,SEC63,OSTM1,ARMC2,SESN1
chr6	117477317	117479286	chr6.117477317.117479286	DCBLD1
chr6	117546101	117549270	chr6.117546101.117549270	DCBLD1
chr6	117606693	117608562	chr6.117606693.117608562	DCBLD1
chr6	117869768	117871775	chr6.117869768.117871775	DCBLD1
chr6	128070425	128072141	chr6.128070425.128072141	LAMA2
chr6	128094521	128098967	chr6.128094521.128098967	LAMA2
chr6	128112085	128113258	chr6.128112085.128113258	LAMA2
chr6	128477860	128479658	chr6.128477860.128479658	LAMA2
chr6	128518985	128521582	chr6.128518985.128521582	LAMA2
chr6	128754519	128755329	chr6.128754519.128755329	LAMA2
chr6	129200979	129201779	chr6.129200979.129201779	LAMA2
chr6	129448772	129449685	chr6.129448772.129449685	LAMA2
chr6	129659960	129664597	chr6.129659960.129664597	ARHGAP18,LAMA2
chr6	129859087	129862237	chr6.129859087.129862237	ARHGAP18,LAMA2
chr6	132115590	132116716	chr6.132115590.132116716	CTGF,MOXD1
chr6	135029780	135031009	chr6.135029780.135031009	AHI1
chr6	135438603	135442168	chr6.135438603.135442168	AHI1
chr6	138160918	138163024	chr6.138160918.138163024	PERP,KIAA1244
chr6	142720870	142723407	chr6.142720870.142723407	AIG1
chr6	143096084	143099384	chr6.143096084.143099384	AIG1
chr6	143111681	143113333	chr6.143111681.143113333	AIG1
chr6	144264789	144266798	chr6.144264789.144266798	UTRN
chr6	144305421	144306958	chr6.144305421.144306958	UTRN
chr6	144317433	144318957	chr6.144317433.144318957	UTRN
chr6	144582588	144583942	chr6.144582588.144583942	UTRN
chr6	144713978	144720893	chr6.144713978.144720893	UTRN
chr6	151748460	151751857	chr6.151748460.151751857	ESR1
chr6	158257411	158258729	chr6.158257411.158258729	DYNLT1
chr6	158356423	158359432	chr6.158356423.158359432	DYNLT1
chr6	158686079	158687973	chr6.158686079.158687973	DYNLT1
chr6	158706852	158709021	chr6.158706852.158709021	DYNLT1
chr7	7719534	7722108	chr7. 7719534. 7722108	GLCCI1,ICA1
chr7	7750650	7752098	chr7. 7750650. 7752098	GLCCI1,ICA1
chr7	7788440	7790920	chr7. 7788440. 7790920	GLCCI1,ICA1
chr7	7847616	7849125	chr7. 7847616. 7849125	GLCCI1,ICA1
chr7	10662573	10664057	chr7. 10662573. 10664057	ICA1,PHF14
chr7	12496921	12497691	chr7. 12496921. 12497691	TMEM106B,VWDE
chr7	12569574	12571270	chr7. 12569574. 12571270	ETV1
chr7	13987602	13992126	chr7. 13987602. 13992126	ETV1
chr7	14195762	14198232	chr7. 14195762. 14198232	ETV1
chr7	14686465	14689170	chr7. 14686465. 14689170	ETV1
chr7	23684814	23686611	chr7. 23684814. 23686611	FAM221A
chr7	24074108	24075798	chr7. 24074108. 24075798	FAM221A
chr7	24455186	24457657	chr7. 24455186. 24457657	FAM221A
chr7	24595603	24596379	chr7. 24595603. 24596379	FAM221A
chr7	25940027	25942226	chr7. 25940027. 25942226	NFE2L3
chr7	26037982	26039583	chr7. 26037982. 26039583	NFE2L3
chr7	26116572	26117757	chr7. 26116572. 26117757	NFE2L3
chr7	26166182	26168294	chr7. 26166182. 26168294	NFE2L3
chr7	28853302	28854837	chr7. 28853302. 28854837	CREB5
chr7	29562277	29567461	chr7. 29562277. 29567461	PRR15
chr7	29638765	29641525	chr7. 29638765. 29641525	PRR15
chr7	29655243	29659092	chr7. 29655243. 29659092	PRR15
chr7	29662922	29664125	chr7. 29662922. 29664125	PRR15
chr7	29825396	29826655	chr7. 29825396. 29826655	PRR15
chr7	32648357	32649732	chr7. 32648357. 32649732	LSM5,FKBP9
chr7	42945067	42946837	chr7. 42945067. 42946837	MRPL32
chr7	43667705	43669467	chr7. 43667705. 43669467	MRPL32
chr7	43669541	43670714	chr7. 43669541. 43670714	MRPL32
chr7	47452028	47455726	chr7. 47452028. 47455726	TNS3
chr7	47527213	47530561	chr7. 47527213. 47530561	TNS3
chr7	73741742	73744035	chr7. 73741742. 73744035	DNAJC30,TMEM120A
chr7	74642920	74644608	chr7. 74642920. 74644608	DNAJC30,TMEM120A
chr7	81767982	81772589	chr7. 81767982. 81772589	HGF
chr7	81775508	81778548	chr7. 81775508. 81778548	HGF
chr7	81786933	81796268	chr7. 81786933. 81796268	HGF
chr7	81800647	81804858	chr7. 81800647. 81804858	HGF
chr7	81845764	81847075	chr7. 81845764. 81847075	HGF
chr7	81883510	81885753	chr7. 81883510. 81885753	HGF
chr7	81885820	81888535	chr7. 81885820. 81888535	HGF
chr7	85023878	85027584	chr7. 85023878. 85027584	SEMA3A
chr7	85038310	85040763	chr7. 85038310. 85040763	SEMA3A
chr7	86785408	86786786	chr7. 86785408. 86786786	SEMA3A
chr7	87318764	87319853	chr7. 87318764. 87319853	CROT,SRI,ADAM22
chr7	90815977	90816967	chr7. 90815977. 90816967	CDK14
chr7	91262538	91265922	chr7. 91262538. 91265922	FZD1,CDK14
chr7	92424268	92424729	chr7. 92424268. 92424729	KRIT1,PEX1,AKAP9
chr7	93378272	93379648	chr7. 93378272. 93379648	PDK4,BET1,PON2
chr7	93534178	93535937	chr7. 93534178. 93535937	PDK4,BET1,PON2
chr7	95544863	95546005	chr7. 95544863. 95546005	PDK4,BET1,PON2
chr7	103129479	103130738	chr7.103129479.103130738	ARMC10
chr7	105125822	105129657	chr7.105125822.105129657	PUS7
chr7	105820697	105822402	chr7.105820697.105822402	CDHR3
chr7	110830761	110832685	chr7.110830761.110832685	THAP5,TMEM168,ZNF277,IFRD1,DOCK4
chr7	111326535	111330334	chr7.111326535.111330334	THAP5,TMEM168,ZNF277,IFRD1,DOCK4
chr7	111765689	111766752	chr7.111765689.111766752	THAP5,TMEM168,ZNF277,IFRD1,DOCK4
chr7	112079350	112082825	chr7.112079350.112082825	THAP5,TMEM168,ZNF277,IFRD1,DOCK4
chr7	112083508	112086037	chr7.112083508.112086037	THAP5,TMEM168,ZNF277,IFRD1,DOCK4
chr7	112865848	112867534	chr7.112865848.112867534	THAP5,TMEM168,ZNF277,IFRD1,DOCK4
chr7	114082154	114088833	chr7.114082154.114088833	FOXP2
chr7	114151658	114152949	chr7.114151658.114152949	FOXP2
chr7	115747003	115747816	chr7.115747003.115747816	FOXP2
chr7	116027895	116029525	chr7.116027895.116029525	FOXP2
chr7	116229051	116231977	chr7.116229051.116231977	CAV2
chr7	116498978	116500868	chr7.116498978.116500868	CAV2
chr7	116510817	116513286	chr7.116510817.116513286	CAV2
chr7	120987809	120990343	chr7.120987809.120990343	ING3,CPED1
chr7	120990410	120992273	chr7.120990410.120992273	ING3,CPED1
chr7	121186617	121187948	chr7.121186617.121187948	CPED1
chr7	122801636	122803776	chr7.122801636.122803776	RNF148,AASS,RNF133,CADPS2
chr7	123189140	123192430	chr7.123189140.123192430	RNF148,AASS,RNF133,CADPS2
chr7	129238336	129239105	chr7.129238336.129239105	FAM71F2,CALU
chr7	129778697	129781224	chr7.129778697.129781224	FAM71F2,CALU
chr7	134635327	134636447	chr7.134635327.134636447	TMEM140,AGBL3
chr7	137923483	137926062	chr7.137923483.137926062	DGKI,TRIM24
chr7	137942036	137944384	chr7.137942036.137944384	DGKI,TRIM24
chr7	137974035	137976546	chr7.137974035.137976546	DGKI,TRIM24
chr7	138013524	138017253	chr7.138013524.138017253	DGKI,TRIM24
chr7	139841581	139843420	chr7.139841581.139843420	C7orf55-LUC7L2,HIPK2,TBXAS1
chr7	139854934	139856292	chr7.139854934.139856292	C7orf55-LUC7L2,HIPK2,TBXAS1
chr7	139936567	139938277	chr7.139936567.139938277	C7orf55-LUC7L2,HIPK2,TBXAS1
chr7	139988413	139990936	chr7.139988413.139990936	C7orf55-LUC7L2,HIPK2,TBXAS1
chr8	27490653	27492453	chr8. 27490653. 27492453	EPHX2
chr8	28467620	28468909	chr8. 28467620. 28468909	FBXO16
chr8	33594463	33600730	chr8. 33594463. 33600730	DUSP26,FUT10
chr8	39944946	39946921	chr8. 39944946. 39946921	ADAM9
chr8	43020423	43021677	chr8. 43020423. 43021677	RNF170
chr8	51986604	51989583	chr8. 51986604. 51989583	PCMTD1
chr8	52005462	52007055	chr8. 52005462. 52007055	PCMTD1
chr8	60688205	60691745	chr8. 60688205. 60691745	CHD7
chr8	60876555	60877847	chr8. 60876555. 60877847	CHD7
chr8	60957515	60959134	chr8. 60957515. 60959134	CHD7
chr8	61096664	61100402	chr8. 61096664. 61100402	CHD7
chr8	61112833	61114571	chr8. 61112833. 61114571	CHD7
chr8	61689332	61690623	chr8. 61689332. 61690623	GGH
chr8	66262799	66264442	chr8. 66262799. 66264442	RRS1,TRIM55,ADHFE1
chr8	66439168	66439649	chr8. 66439168. 66439649	ADHFE1,SGK3,CSPP1
chr8	69898971	69900317	chr8. 69898971. 69900317	TRAM1,SLCO5A1,XKR9,NCOA2
chr8	70147618	70149793	chr8. 70147618. 70149793	TRAM1,SLCO5A1,XKR9,NCOA2
chr8	70226801	70227392	chr8. 70226801. 70227392	TRAM1,SLCO5A1,XKR9,NCOA2
chr8	71257744	71261109	chr8. 71257744. 71261109	XKR9,EYA1
chr8	71262976	71264765	chr8. 71262976. 71264765	XKR9,EYA1
chr8	71361068	71362909	chr8. 71361068. 71362909	XKR9,EYA1
chr8	78444344	78445357	chr8. 78444344. 78445357	ZC2HC1A
chr8	79721542	79727662	chr8. 79721542. 79727662	HEY1
chr8	79737296	79738633	chr8. 79737296. 79738633	HEY1
chr8	81729972	81733045	chr8. 81729972. 81733045	ZFAND1,CHMP4C
chr8	85254309	85255499	chr8. 85254309. 85255499	C8orf59,LRRCC1
chr8	93152727	93155827	chr8. 93152727. 93155827	TRIQK
chr8	93158135	93160658	chr8. 93158135. 93160658	TRIQK
chr8	97595936	97599732	chr8. 97595936. 97599732	MTDH,LAPTM4B
chr8	101149592	101152475	chr8.101149592.101152475	ZNF706
chr8	106284039	106287361	chr8.106284039.106287361	OXR1
chr8	106447595	106451062	chr8.106447595.106451062	OXR1
chr8	106524047	106526421	chr8.106524047.106526421	OXR1
chr8	106591437	106593569	chr8.106591437.106593569	OXR1
chr8	106593791	106596839	chr8.106593791.106596839	OXR1
chr8	106606392	106609655	chr8.106606392.106609655	OXR1
chr8	106616950	106619019	chr8.106616950.106619019	OXR1
chr8	106857079	106859801	chr8.106857079.106859801	OXR1
chr8	117386034	117387215	chr8.117386034.117387215	EXT1,SAMD12
chr8	118503234	118509934	chr8.118503234.118509934	EXT1,SAMD12
chr8	119903008	119904646	chr8.119903008.119904646	DEPTOR,SNTB1
chr8	119904679	119911994	chr8.119904679.119911994	DEPTOR,SNTB1
chr8	119914602	119925080	chr8.119914602.119925080	DEPTOR,SNTB1
chr8	119930247	119936878	chr8.119930247.119936878	DEPTOR,SNTB1
chr8	119941390	119943875	chr8.119941390.119943875	DEPTOR,SNTB1
chr8	119946355	119948320	chr8.119946355.119948320	DEPTOR,SNTB1
chr8	119950439	119953325	chr8.119950439.119953325	DEPTOR,SNTB1
chr8	123515852	123518492	chr8.123515852.123518492	WDYHV1
chr8	123921663	123923179	chr8.123921663.123923179	TMEM65
chr8	124012875	124014403	chr8.124012875.124014403	TMEM65
chr8	133393018	133394635	chr8.133393018.133394635	NDRG1
chr9	636438	639681	chr9. 636438. 639681	DMRT2,KANK1
chr9	645233	647867	chr9. 645233. 647867	DMRT2,KANK1
chr9	652197	655257	chr9. 652197. 655257	DMRT2,KANK1
chr9	676956	679296	chr9. 676956. 679296	DMRT2,KANK1
chr9	699418	701798	chr9. 699418. 701798	DMRT2,KANK1
chr9	1047235	1048772	chr9. 1047235. 1048772	DMRT2,KANK1
chr9	1100296	1103988	chr9. 1100296. 1103988	DMRT2
chr9	1758472	1760541	chr9. 1758472. 1760541	DMRT2
chr9	1938065	1940239	chr9. 1938065. 1940239	DMRT2
chr9	3758195	3760503	chr9. 3758195. 3760503	GLIS3
chr9	4236986	4238985	chr9. 4236986. 4238985	GLIS3
chr9	4297174	4300050	chr9. 4297174. 4300050	GLIS3
chr9	4754518	4755864	chr9. 4754518. 4755864	CD274,AK3,RCL1,JAK2,RIC1,ERMP1
chr9	5492804	5494679	chr9. 5492804. 5494679	CD274,AK3,RCL1,JAK2,RIC1,ERMP1
chr9	5529307	5533370	chr9. 5529307. 5533370	CD274,AK3,RCL1,JAK2,RIC1,ERMP1
chr9	6106660	6107537	chr9. 6106660. 6107537	ERMP1
chr9	6654597	6655864	chr9. 6654597. 6655864	ERMP1
chr9	12774736	12778387	chr9. 12774736. 12778387	LURAP1L
chr9	20242407	20243405	chr9. 20242407. 20243405	MLLT3,FOCAD
chr9	20350623	20358947	chr9. 20350623. 20358947	MLLT3,FOCAD
chr9	20360190	20363787	chr9. 20360190. 20363787	MLLT3,FOCAD
chr9	20372678	20384233	chr9. 20372678. 20384233	MLLT3,FOCAD
chr9	20424441	20427320	chr9. 20424441. 20427320	MLLT3,FOCAD
chr9	20439875	20444094	chr9. 20439875. 20444094	MLLT3,FOCAD
chr9	20476090	20482371	chr9. 20476090. 20482371	MLLT3,FOCAD
chr9	20552758	20554879	chr9. 20552758. 20554879	MLLT3,FOCAD
chr9	20557420	20558791	chr9. 20557420. 20558791	MLLT3,FOCAD
chr9	20572241	20573685	chr9. 20572241. 20573685	MLLT3,FOCAD
chr9	20640284	20641232	chr9. 20640284. 20641232	MLLT3,FOCAD
chr9	21788425	21789352	chr9. 21788425. 21789352	KLHL9
chr9	21964690	21966552	chr9. 21964690. 21966552	CDKN2A,MTAP
chr9	21986250	21988747	chr9. 21986250. 21988747	CDKN2A,MTAP
chr9	26745839	26747442	chr9. 26745839. 26747442	IFT74
chr9	33452433	33455048	chr9. 33452433. 33455048	NOL6,NFX1,UBAP2,NUDT2
chr9	34051949	34053780	chr9. 34051949. 34053780	NOL6,NFX1,UBAP2,NUDT2
chr9	35160948	35163581	chr9. 35160948. 35163581	UNC13B
chr9	35321178	35322901	chr9. 35321178. 35322901	UNC13B
chr9	68804856	68808158	chr9. 68804856. 68808158	FAM122A,PIP5K1B
chr9	68911765	68914550	chr9. 68911765. 68914550	FAM122A,PIP5K1B
chr9	68914623	68916687	chr9. 68914623. 68916687	FAM122A,PIP5K1B
chr9	68973601	68976663	chr9. 68973601. 68976663	FAM122A,PIP5K1B
chr9	68979271	68982578	chr9. 68979271. 68982578	FAM122A,PIP5K1B
chr9	68982717	68984193	chr9. 68982717. 68984193	FAM122A,PIP5K1B
chr9	68997875	68999972	chr9. 68997875. 68999972	FAM122A,PIP5K1B
chr9	69026416	69029207	chr9. 69026416. 69029207	FAM122A,PIP5K1B
chr9	78195033	78197830	chr9. 78195033. 78197830	PSAT1
chr9	79567125	79569261	chr9. 79567125. 79569261	TLE1
chr9	86062747	86063863	chr9. 86062747. 86063863	NAA35
chr9	90940262	90945416	chr9. 90940262. 90945416	NFIL3,ROR2,AUH
chr9	90957674	90959689	chr9. 90957674. 90959689	NFIL3,ROR2,AUH
chr9	91117285	91119188	chr9. 91117285. 91119188	NFIL3,ROR2,AUH
chr9	91272035	91276332	chr9. 91272035. 91276332	NFIL3,ROR2,AUH
chr9	91798261	91800245	chr9. 91798261. 91800245	SPTLC1,ROR2
chr9	91870645	91875954	chr9. 91870645. 91875954	SPTLC1,ROR2
chr9	92533946	92535375	chr9. 92533946. 92535375	SPTLC1,IARS
chr9	95048291	95049053	chr9. 95048291. 95049053	FANCC
chr9	96149528	96151599	chr9. 96149528. 96151599	PTCH1,FANCC
chr9	96666540	96666955	chr9. 96666540. 96666955	CDC14B,HABP4
chr9	97446727	97448032	chr9. 97446727. 97448032	TSTD2
chr9	97626960	97629394	chr9. 97626960. 97629394	TSTD2
chr9	98807324	98808226	chr9. 98807324. 98808226	ANKS6,GALNT12
chr9	100447440	100452288	chr9.100447440.100452288	MSANTD3,MURC
chr9	100472478	100474439	chr9.100472478.100474439	MSANTD3,MURC
chr9	100498860	100500771	chr9.100498860.100500771	MSANTD3,MURC
chr9	100553926	100557729	chr9.100553926.100557729	MSANTD3,MURC
chr9	100580903	100583081	chr9.100580903.100583081	MSANTD3,MURC
chr9	105263787	105265563	chr9.105263787.105265563	FKTN,SLC44A1,TMEM38B
chr9	110307162	110310535	chr9.110307162.110310535	TXN
chr9	110333808	110335161	chr9.110333808.110335161	TXN
chr9	113529895	113532498	chr9.113529895.113532498	SLC31A2,ALAD,C9orf43
chr9	114497198	114498269	chr9.114497198.114498269	TNC
chr9	114537387	114541123	chr9.114537387.114541123	TNC
chr9	115743449	115744656	chr9.115743449.115744656	TRIM32
chr9	121357987	121361491	chr9.121357987.121361491	STOM
chr9	127067388	127068126	chr9.127067388.127068126	ZNF79
chr9	128361527	128362921	chr9.128361527.128362921	ENDOG,DOLK,SWI5,SLC27A4,LRRC8A,PHYHD1
chr9	128920234	128923095	chr9.128920234.128923095	ENDOG,DOLK,SWI5,SLC27A4,LRRC8A,PHYHD1
chr10	15714158	15721832	chr10. 15714158. 15721832	ITGA8
chr10	15747194	15749491	chr10. 15747194. 15749491	ITGA8
chr10	22132729	22134974	chr10. 22132729. 22134974	COMMD3,BMI1,DNAJC1
chr10	24423734	24425703	chr10. 24423734. 24425703	KIAA1217
chr10	24448048	24452448	chr10. 24448048. 24452448	KIAA1217
chr10	24452778	24461995	chr10. 24452778. 24461995	KIAA1217
chr10	24463278	24468944	chr10. 24463278. 24468944	KIAA1217
chr10	27996993	27999493	chr10. 27996993. 27999493	MKX,ARMC4
chr10	28177615	28179603	chr10. 28177615. 28179603	MKX,ARMC4
chr10	34778886	34783255	chr10. 34778886. 34783255	PARD3
chr10	34808453	34810196	chr10. 34808453. 34810196	PARD3
chr10	34813656	34816264	chr10. 34813656. 34816264	PARD3
chr10	34863560	34865585	chr10. 34863560. 34865585	PARD3
chr10	42690008	42691878	chr10. 42690008. 42691878	ZNF33B
chr10	51238032	51242206	chr10. 51238032. 51242206	DKK1,PRKG1
chr10	51858543	51861523	chr10. 51858543. 51861523	DKK1,PRKG1
chr10	51875610	51877367	chr10. 51875610. 51877367	DKK1,PRKG1
chr10	51878222	51880114	chr10. 51878222. 51880114	DKK1,PRKG1
chr10	52256310	52258029	chr10. 52256310. 52258029	DKK1,PRKG1
chr10	52409524	52415274	chr10. 52409524. 52415274	DKK1,PRKG1
chr10	52435699	52437979	chr10. 52435699. 52437979	DKK1,PRKG1
chr10	52440065	52441574	chr10. 52440065. 52441574	DKK1,PRKG1
chr10	52465448	52467368	chr10. 52465448. 52467368	DKK1,PRKG1
chr10	52476058	52479032	chr10. 52476058. 52479032	DKK1,PRKG1
chr10	52483236	52485021	chr10. 52483236. 52485021	DKK1,PRKG1
chr10	52566460	52567128	chr10. 52566460. 52567128	DKK1,PRKG1
chr10	52570472	52571313	chr10. 52570472. 52571313	DKK1,PRKG1
chr10	59035366	59037796	chr10. 59035366. 59037796	CCDC6,ANK3
chr10	63573161	63573745	chr10. 63573161. 63573745	REEP3
chr10	65886180	65886999	chr10. 65886180. 65886999	CTNNA3
chr10	68559671	68563803	chr10. 68559671. 68563803	SLC25A16,TET1
chr10	68683709	68685410	chr10. 68683709. 68685410	SLC25A16,TET1
chr10	72131731	72134057	chr10. 72131731. 72134057	DDIT4
chr10	74596740	74600544	chr10. 74596740. 74600544	KAT6B
chr10	74750704	74751247	chr10. 74750704. 74751247	KAT6B
chr10	80944597	80946456	chr10. 80944597. 80946456	FAM213A,NRG3
chr10	81135195	81137444	chr10. 81135195. 81137444	FAM213A,NRG3
chr10	81594225	81595833	chr10. 81594225. 81595833	FAM213A,NRG3
chr10	81723738	81725014	chr10. 81723738. 81725014	FAM213A,NRG3
chr10	81865086	81869661	chr10. 81865086. 81869661	FAM213A,NRG3
chr10	81869992	81877524	chr10. 81869992. 81877524	FAM213A,NRG3
chr10	82278243	82279391	chr10. 82278243. 82279391	FAM213A,NRG3
chr10	83989703	83991857	chr10. 83989703. 83991857	FAM213A,NRG3
chr10	87533846	87535752	chr10. 87533846. 87535752	PAPSS2
chr10	92211487	92212201	chr10. 92211487. 92212201	CPEB3
chr10	93031636	93034890	chr10. 93031636. 93034890	MYOF
chr10	93850475	93852784	chr10. 93850475. 93852784	TBC1D12
chr10	97157097	97158509	chr10. 97157097. 97158509	TM9SF3
chr10	97560353	97561689	chr10. 97560353. 97561689	AVPI1
chr10	98410020	98413369	chr10. 98410020. 98413369	LOXL4,PYROXD2
chr10	118987375	118988064	chr10.118987375.118988064	EIF3A
chr10	123522448	123523733	chr10.123522448.123523733	ACADSB
chr11	225049	226743	chr11. 225049. 226743	IFITM1
chr11	628368	629980	chr11. 628368. 629980	IFITM1
chr11	848485	850130	chr11. 848485. 850130	IFITM1,KCNQ1
chr11	2774101	2780933	chr11. 2774101. 2780933	KCNQ1
chr11	5227723	5230709	chr11. 5227723. 5230709	HBD
chr11	5233428	5234745	chr11. 5233428. 5234745	HBD
chr11	6095308	6096558	chr11. 6095308. 6096558	HBD
chr11	7031272	7032254	chr11. 7031272. 7032254	OR2D2,ZNF215,PPFIBP2
chr11	7546381	7550990	chr11. 7546381. 7550990	OR2D2,ZNF215,PPFIBP2
chr11	10314108	10315336	chr11. 10314108. 10315336	SBF2
chr11	13337436	13339085	chr11. 13337436. 13339085	TEAD1
chr11	17013001	17015759	chr11. 17013001. 17015759	PLEKHA7,PIK3C2A
chr11	17385460	17387025	chr11. 17385460. 17387025	PLEKHA7,PIK3C2A
chr11	19449199	19451300	chr11. 19449199. 19451300	NAV2
chr11	19550796	19552656	chr11. 19550796. 19552656	NAV2
chr11	22191476	22194639	chr11. 22191476. 22194639	ANO5
chr11	22580073	22583525	chr11. 22580073. 22583525	SVIP,GAS2
chr11	22663653	22675679	chr11. 22663653. 22675679	SVIP,GAS2
chr11	24899803	24901394	chr11. 24899803. 24901394	SVIP
chr11	26227431	26228691	chr11. 26227431. 26228691	SVIP
chr11	26283900	26285113	chr11. 26283900. 26285113	LIN7C,LGR4
chr11	26761124	26762998	chr11. 26761124. 26762998	LIN7C,LGR4
chr11	31768697	31769351	chr11. 31768697. 31769351	DNAJC24
chr11	45821171	45825214	chr11. 45821171. 45825214	MDK
chr11	46435593	46438724	chr11. 46435593. 46438724	MDK
chr11	59536721	59537989	chr11. 59536721. 59537989	TMX2,OSBP
chr11	61141059	61142706	chr11. 61141059. 61142706	DDB1
chr11	62448919	62450983	chr11. 62448919. 62450983	TMEM179B,GANAB,BSCL2
chr11	62461350	62463792	chr11. 62461350. 62463792	TMEM179B,GANAB,BSCL2
chr11	63916570	63918495	chr11. 63916570. 63918495	RTN3
chr11	64180616	64182431	chr11. 64180616. 64182431	RTN3
chr11	65801587	65804510	chr11. 65801587. 65804510	RELA,CCDC85B,AP5B1,CTSW
chr11	65908690	65910107	chr11. 65908690. 65910107	RELA,CCDC85B,AP5B1,CTSW
chr11	68208517	68210521	chr11. 68208517. 68210521	SUV420H1
chr11	68824808	68826548	chr11. 68824808. 68826548	CCND1,PPFIA1,FAM86C1,CPT1A,MYEOV,DHCR7
chr11	73217628	73218955	chr11. 73217628. 73218955	STARD10
chr11	73306976	73308855	chr11. 73306976. 73308855	STARD10
chr11	76782305	76784248	chr11. 76782305. 76784248	LIPT2,RAB6A,COA4,NEU3,NDUFC2,PPME1,PAK1,AAMDC,ALG8,GAB2
chr11	77440766	77443594	chr11. 77440766. 77443594	LIPT2,RAB6A,COA4,NEU3,NDUFC2,PPME1,PAK1,AAMDC,ALG8,GAB2
chr11	77456157	77458301	chr11. 77456157. 77458301	LIPT2,RAB6A,COA4,NEU3,NDUFC2,PPME1,PAK1,AAMDC,ALG8,GAB2
chr11	77470076	77472147	chr11. 77470076. 77472147	LIPT2,RAB6A,COA4,NEU3,NDUFC2,PPME1,PAK1,AAMDC,ALG8,GAB2
chr11	78039467	78040719	chr11. 78039467. 78040719	LIPT2,RAB6A,COA4,NEU3,NDUFC2,PPME1,PAK1,AAMDC,ALG8,GAB2
chr11	86182784	86184587	chr11. 86182784. 86184587	PICALM
chr11	86954608	86956767	chr11. 86954608. 86956767	TMEM135
chr11	93028555	93029753	chr11. 93028555. 93029753	SLC36A4
chr11	95998881	96002391	chr11. 95998881. 96002391	JRKL
chr11	96027564	96031295	chr11. 96027564. 96031295	JRKL
chr11	99019214	99024346	chr11. 99019214. 99024346	JRKL,CNTN5
chr11	99066092	99072188	chr11. 99066092. 99072188	JRKL,CNTN5
chr11	99096474	99100185	chr11. 99096474. 99100185	JRKL,CNTN5
chr11	99154517	99155694	chr11. 99154517. 99155694	JRKL,CNTN5
chr11	99160159	99163887	chr11. 99160159. 99163887	JRKL,CNTN5
chr11	99430784	99433678	chr11. 99430784. 99433678	JRKL,CNTN5
chr11	99685851	99687620	chr11. 99685851. 99687620	JRKL,CNTN5
chr11	100581147	100581990	chr11.100581147.100581990	ARHGAP42
chr11	100718852	100720981	chr11.100718852.100720981	ARHGAP42
chr11	100734520	100735931	chr11.100734520.100735931	ARHGAP42
chr11	100917308	100920159	chr11.100917308.100920159	ARHGAP42
chr11	106156393	106157420	chr11.106156393.106157420	MSANTD4,KBTBD3
chr11	106157754	106159187	chr11.106157754.106159187	MSANTD4,KBTBD3
chr11	106564528	106565894	chr11.106564528.106565894	MSANTD4,KBTBD3
chr11	108944544	108945991	chr11.108944544.108945991	DDX10
chr11	108958934	108959880	chr11.108958934.108959880	DDX10
chr11	109085528	109086710	chr11.109085528.109086710	DDX10
chr11	109782890	109786410	chr11.109782890.109786410	DDX10
chr11	109945167	109947238	chr11.109945167.109947238	FDX1,RDX
chr11	109984058	109985791	chr11.109984058.109985791	FDX1,RDX
chr11	110092136	110094261	chr11.110092136.110094261	FDX1,RDX
chr11	110327505	110328052	chr11.110327505.110328052	FDX1,RDX
chr11	110478811	110480403	chr11.110478811.110480403	FDX1
chr11	111301707	111303063	chr11.111301707.111303063	COLCA2
chr11	111327015	111328884	chr11.111327015.111328884	COLCA2
chr11	112961043	112963973	chr11.112961043.112963973	TTC12,NCAM1
chr11	113005122	113007920	chr11.113005122.113007920	TTC12,NCAM1
chr11	113777735	113779131	chr11.113777735.113779131	TTC12,NCAM1
chr11	114171772	114173863	chr11.114171772.114173863	NNMT
chr11	114340179	114341722	chr11.114340179.114341722	C11orf71,REXO2,NXPE4,NXPE1,NNMT
chr11	114594389	114596361	chr11.114594389.114596361	C11orf71,REXO2,NXPE4,NXPE1,NNMT
chr11	115500703	115504458	chr11.115500703.115504458	CADM1
chr11	118695269	118697065	chr11.118695269.118697065	CCDC84
chr11	119902112	119903021	chr11.119902112.119903021	OAF
chr11	120343701	120345742	chr11.120343701.120345742	TBCEL,ARHGEF12,TECTA,GRIK4
chr11	120493676	120496187	chr11.120493676.120496187	TBCEL,ARHGEF12,TECTA,GRIK4
chr11	120505797	120507058	chr11.120505797.120507058	TBCEL,ARHGEF12,TECTA,GRIK4
chr11	120510930	120514031	chr11.120510930.120514031	TBCEL,ARHGEF12,TECTA,GRIK4
chr11	120596945	120598523	chr11.120596945.120598523	TBCEL,ARHGEF12,TECTA,GRIK4
chr11	120612099	120614494	chr11.120612099.120614494	TBCEL,ARHGEF12,TECTA,GRIK4
chr11	120698313	120700198	chr11.120698313.120700198	TBCEL,ARHGEF12,TECTA,GRIK4
chr11	120713984	120716220	chr11.120713984.120716220	TBCEL,ARHGEF12,TECTA,GRIK4
chr11	120952492	120952996	chr11.120952492.120952996	TBCEL,ARHGEF12,TECTA,GRIK4
chr11	120985785	120986724	chr11.120985785.120986724	TBCEL,ARHGEF12,TECTA,GRIK4
chr11	121035296	121037975	chr11.121035296.121037975	TBCEL,ARHGEF12,TECTA,GRIK4
chr11	121057878	121059603	chr11.121057878.121059603	TBCEL,ARHGEF12,TECTA,GRIK4
chr11	121059748	121061141	chr11.121059748.121061141	TBCEL,ARHGEF12,TECTA,GRIK4
chr11	121070814	121072361	chr11.121070814.121072361	TBCEL,ARHGEF12,TECTA,GRIK4
chr11	126442372	126444204	chr11.126442372.126444204	TIRAP
chr11	128405088	128407319	chr11.128405088.128407319	FLI1
chr11	128684581	128688030	chr11.128684581.128688030	FLI1
chr11	129434771	129438055	chr11.129434771.129438055	ARHGAP32
chr11	130764292	130767802	chr11.130764292.130767802	SNX19
chr11	130803678	130805739	chr11.130803678.130805739	SNX19
chr11	130845910	130850622	chr11.130845910.130850622	SNX19
chr12	6339577	6342874	chr12. 6339577. 6342874	TNFRSF1A
chr12	10157606	10161701	chr12. 10157606. 10161701	GABARAPL1,TMEM52B
chr12	11829460	11831678	chr12. 11829460. 11831678	MANSC1,ETV6,LRP6
chr12	11890969	11893549	chr12. 11890969. 11893549	MANSC1,ETV6,LRP6
chr12	11893981	11897301	chr12. 11893981. 11897301	MANSC1,ETV6,LRP6
chr12	11901437	11903423	chr12. 11901437. 11903423	MANSC1,ETV6,LRP6
chr12	12032133	12033528	chr12. 12032133. 12033528	MANSC1,ETV6,LRP6
chr12	12070680	12072760	chr12. 12070680. 12072760	MANSC1,ETV6,LRP6
chr12	12949969	12955013	chr12. 12949969. 12955013	GPRC5D,EMP1
chr12	21483120	21484054	chr12. 21483120. 21484054	GOLT1B
chr12	25186573	25187646	chr12. 25186573. 25187646	KRAS
chr12	25282045	25284081	chr12. 25282045. 25284081	KRAS
chr12	25364353	25365850	chr12. 25364353. 25365850	KRAS
chr12	25429513	25430513	chr12. 25429513. 25430513	RASSF8
chr12	25435556	25436570	chr12. 25435556. 25436570	RASSF8
chr12	25712910	25713463	chr12. 25712910. 25713463	RASSF8
chr12	25957804	25960568	chr12. 25957804. 25960568	RASSF8
chr12	25982037	25983291	chr12. 25982037. 25983291	RASSF8
chr12	26035983	26036434	chr12. 26035983. 26036434	RASSF8
chr12	26282146	26284233	chr12. 26282146. 26284233	BHLHE41,RASSF8
chr12	26869719	26871641	chr12. 26869719. 26871641	ASUN
chr12	29154710	29155974	chr12. 29154710. 29155974	FAR2,ERGIC2
chr12	29190772	29192582	chr12. 29190772. 29192582	FAR2,ERGIC2
chr12	32398718	32400513	chr12. 32398718. 32400513	FGD4
chr12	33519865	33521625	chr12. 33519865. 33521625	PKP2
chr12	40168156	40169327	chr12. 40168156. 40169327	SLC2A13
chr12	40760774	40764973	chr12. 40760774. 40764973	PDZRN4,CNTN1
chr12	40768203	40773002	chr12. 40768203. 40773002	PDZRN4,CNTN1
chr12	41286914	41288799	chr12. 41286914. 41288799	PDZRN4,CNTN1
chr12	41435376	41444889	chr12. 41435376. 41444889	PDZRN4,CNTN1
chr12	41475719	41478140	chr12. 41475719. 41478140	PDZRN4,CNTN1
chr12	42545977	42547515	chr12. 42545977. 42547515	PDZRN4,CNTN1
chr12	45223718	45224817	chr12. 45223718. 45224817	ANO6
chr12	47827850	47829948	chr12. 47827850. 47829948	SLC48A1
chr12	48787543	48790365	chr12. 48787543. 48790365	ADCY6,RHEBL1
chr12	56990805	56992279	chr12. 56990805. 56992279	CNPY2,SPRYD4
chr12	58423422	58427241	chr12. 58423422. 58427241	LRIG3
chr12	58918070	58921837	chr12. 58918070. 58921837	LRIG3
chr12	59382559	59383303	chr12. 59382559. 59383303	LRIG3
chr12	60224982	60226802	chr12. 60224982. 60226802	LRIG3
chr12	65917297	65918478	chr12. 65917297. 65918478	TMBIM4,TBC1D30,MSRB3,HELB,GRIP1
chr12	66573023	66574524	chr12. 66573023. 66574524	TMBIM4,TBC1D30,MSRB3,HELB,GRIP1
chr12	68462330	68463283	chr12. 68462330. 68463283	MDM2
chr12	76143124	76145162	chr12. 76143124. 76145162	PHLDA1
chr12	76151960	76152852	chr12. 76151960. 76152852	PHLDA1
chr12	78088415	78089094	chr12. 78088415. 78089094	SYT1
chr12	78357689	78359961	chr12. 78357689. 78359961	SYT1
chr12	78622583	78623639	chr12. 78622583. 78623639	SYT1
chr12	79019453	79020978	chr12. 79019453. 79020978	SYT1
chr12	79067571	79069705	chr12. 79067571. 79069705	SYT1
chr12	79085313	79088165	chr12. 79085313. 79088165	SYT1
chr12	79186651	79187970	chr12. 79186651. 79187970	SYT1
chr12	80216944	80219503	chr12. 80216944. 80219503	SYT1
chr12	82647637	82649263	chr12. 82647637. 82649263	TMTC2
chr12	82869486	82875528	chr12. 82869486. 82875528	TMTC2
chr12	89307147	89308435	chr12. 89307147. 89308435	POC1B
chr12	92768637	92770378	chr12. 92768637. 92770378	NUDT4
chr12	92870980	92871545	chr12. 92870980. 92871545	NUDT4
chr12	93007412	93008306	chr12. 93007412. 93008306	NUDT4
chr12	93569213	93575671	chr12. 93569213. 93575671	SOCS2
chr12	93590815	93592638	chr12. 93590815. 93592638	SOCS2
chr12	93802880	93803929	chr12. 93802880. 93803929	SOCS2
chr12	96403132	96406067	chr12. 96403132. 96406067	CFAP54
chr12	96495008	96496964	chr12. 96495008. 96496964	CFAP54
chr12	102405274	102408504	chr12.102405274.102408504	GNPTAB,IGF1,DRAM1
chr12	102435195	102438012	chr12.102435195.102438012	GNPTAB,IGF1,DRAM1
chr12	102457298	102459226	chr12.102457298.102459226	GNPTAB,IGF1,DRAM1
chr12	106753196	106754799	chr12.106753196.106754799	MTERF2,POLR3B,CRY1
chr12	108782866	108787443	chr12.108782866.108787443	ALKBH2,CORO1C
chr12	109113114	109116964	chr12.109113114.109116964	ACACB
chr12	116048149	116049489	chr12.116048149.116049489	MAP1LC3B2
chr12	116122669	116124539	chr12.116122669.116124539	MAP1LC3B2
chr12	116319501	116320883	chr12.116319501.116320883	MAP1LC3B2
chr12	116599386	116600142	chr12.116599386.116600142	MAP1LC3B2
chr12	120078517	120080891	chr12.120078517.120080891	PXN
chr12	121391556	121392664	chr12.121391556.121392664	MLEC,P2RX7
chr12	122945907	122949278	chr12.122945907.122949278	ZCCHC8,CLIP1
chr13	25901930	25903950	chr13. 25901930. 25903950	SHISA2
chr13	32829090	32830260	chr13. 32829090. 32830260	STARD13
chr13	33187545	33190318	chr13. 33187545. 33190318	STARD13
chr13	34085487	34087151	chr13. 34085487. 34087151	NBEA
chr13	35915252	35919429	chr13. 35915252. 35919429	NBEA
chr13	36190709	36193800	chr13. 36190709. 36193800	SPG20
chr13	38180077	38182264	chr13. 38180077. 38182264	SPG20
chr13	38327066	38329275	chr13. 38327066. 38329275	SPG20
chr13	38414977	38416803	chr13. 38414977. 38416803	SPG20
chr13	41486777	41489251	chr13. 41486777. 41489251	NAA16
chr13	77914370	77920669	chr13. 77914370. 77920669	EDNRB
chr13	77950490	77952074	chr13. 77950490. 77952074	EDNRB
chr13	79081808	79082448	chr13. 79081808. 79082448	EDNRB
chr13	113859586	113865047	chr13.113859586.113865047	GAS6
chr13	114222193	114223297	chr13.114222193.114223297	GAS6
chr14	21504271	21505934	chr14. 21504271. 21505934	RAB2B
chr14	23056302	23057035	chr14. 23056302. 23057035	CIDEB,HOMEZ,THTPA,IRF9
chr14	24332380	24333151	chr14. 24332380. 24333151	CIDEB,HOMEZ,THTPA,IRF9
chr14	32205691	32207247	chr14. 32205691. 32207247	ARHGAP5,DTD2,AKAP6
chr14	32436132	32440140	chr14. 32436132. 32440140	ARHGAP5,DTD2,AKAP6
chr14	32937769	32940658	chr14. 32937769. 32940658	AKAP6
chr14	35414408	35417775	chr14. 35414408. 35417775	CFL2,RALGAPA1
chr14	35939879	35941722	chr14. 35939879. 35941722	BRMS1L,MBIP,RALGAPA1
chr14	51619911	51626328	chr14. 51619911. 51626328	FRMD6,NID2
chr14	51650568	51656211	chr14. 51650568. 51656211	FRMD6,NID2
chr14	54317209	54320067	chr14. 54317209. 54320067	BMP4
chr14	57058141	57060721	chr14. 57058141. 57060721	AP5M1
chr14	60721029	60724901	chr14. 60721029. 60724901	SIX4
chr14	61101624	61103075	chr14. 61101624. 61103075	SIX4
chr14	61119859	61121156	chr14. 61119859. 61121156	SIX4
chr14	67184695	67188214	chr14. 67184695. 67188214	MPP5,EIF2S1,GPHN
chr14	67188484	67190520	chr14. 67188484. 67190520	MPP5,EIF2S1,GPHN
chr14	69878758	69883270	chr14. 69878758. 69883270	SMOC1,SYNJ2BP
chr14	69894336	69896604	chr14. 69894336. 69896604	SMOC1,SYNJ2BP
chr14	69903914	69905060	chr14. 69903914. 69905060	SMOC1,SYNJ2BP
chr14	69906992	69911408	chr14. 69906992. 69911408	SMOC1,SYNJ2BP
chr14	70007992	70009637	chr14. 70007992. 70009637	SMOC1,SYNJ2BP
chr14	70871526	70873064	chr14. 70871526. 70873064	SMOC1,SYNJ2BP
chr14	81000313	81002787	chr14. 81000313. 81002787	TSHR,SEL1L
chr14	83638578	83639805	chr14. 83638578. 83639805	TSHR,SEL1L
chr14	86086728	86088760	chr14. 86086728. 86088760	TSHR,SEL1L
chr14	86333389	86335430	chr14. 86333389. 86335430	TSHR,SEL1L
chr14	86345549	86348566	chr14. 86345549. 86348566	TSHR,SEL1L
chr14	86539062	86542578	chr14. 86539062. 86542578	TSHR,SEL1L
chr14	95253829	95256903	chr14. 95253829. 95256903	CLMN
chr14	99593327	99597149	chr14. 99593327. 99597149	WARS
chr15	27588853	27589907	chr15. 27588853. 27589907	SNURF,SNURF,SNRPN
chr15	27601258	27602196	chr15. 27601258. 27602196	SNURF,SNURF,SNRPN
chr15	27621987	27624794	chr15. 27621987. 27624794	SNURF,SNURF,SNRPN
chr15	31482164	31484317	chr15. 31482164. 31484317	KLF13
chr15	32861106	32863113	chr15. 32861106. 32863113	FMN1
chr15	32923611	32925454	chr15. 32923611. 32925454	FMN1
chr15	33005114	33009528	chr15. 33005114. 33009528	FMN1,FMN1,AVEN
chr15	33894066	33894766	chr15. 33894066. 33894766	FMN1,AVEN
chr15	33914932	33916308	chr15. 33914932. 33916308	FMN1,AVEN
chr15	38423590	38425619	chr15. 38423590. 38425619	FAM98B
chr15	40252379	40253547	chr15. 40252379. 40253547	EIF2AK4
chr15	40408775	40409907	chr15. 40408775. 40409907	EIF2AK4
chr15	40435773	40436964	chr15. 40435773. 40436964	EIF2AK4
chr15	40945760	40947029	chr15. 40945760. 40947029	C15orf57,RMDN3,SPINT1,CHP1
chr15	42595202	42596751	chr15. 42595202. 42596751	HYPK,JMJD7,TMEM87A,STARD9,TTBK2,TMEM62
chr15	44384759	44386005	chr15. 44384759. 44386005	EIF3J,CASC4
chr15	46110956	46112365	chr15. 46110956. 46112365	SQRDL
chr15	46117561	46122593	chr15. 46117561. 46122593	SQRDL
chr15	46148950	46152681	chr15. 46148950. 46152681	SQRDL
chr15	46296634	46300032	chr15. 46296634. 46300032	SQRDL
chr15	46702616	46704918	chr15. 46702616. 46704918	SQRDL
chr15	46946624	46948161	chr15. 46946624. 46948161	SQRDL
chr15	47300289	47302812	chr15. 47300289. 47302812	SQRDL
chr15	47334473	47335916	chr15. 47334473. 47335916	SQRDL
chr15	48493274	48494366	chr15. 48493274. 48494366	EID1,DTWD1,FBN1,SECISBP2L,FAM227B
chr15	49470537	49473617	chr15. 49470537. 49473617	EID1,DTWD1,FBN1,SECISBP2L,FAM227B
chr15	50003900	50004520	chr15. 50003900. 50004520	EID1,DTWD1,FBN1,SECISBP2L,FAM227B
chr15	52288629	52291746	chr15. 52288629. 52291746	MYO5C,FAM214A
chr15	52506337	52507860	chr15. 52506337. 52507860	MYO5C,FAM214A
chr15	58296889	58299772	chr15. 58296889. 58299772	FAM63B,ADAM10
chr15	58776112	58777669	chr15. 58776112. 58777669	FAM63B,ADAM10
chr15	60228414	60229597	chr15. 60228414. 60229597	ICE2,TPM1,RORA
chr15	62554292	62555231	chr15. 62554292. 62555231	ICE2,TPM1,RORA
chr15	63471108	63472044	chr15. 63471108. 63472044	USP3,FAM96A
chr15	63841165	63843125	chr15. 63841165. 63843125	USP3,FAM96A
chr15	64443258	64445036	chr15. 64443258. 64445036	ANKDD1A,ZNF609,MTFMT
chr15	64910811	64913405	chr15. 64910811. 64913405	ANKDD1A,ZNF609,MTFMT
chr15	64925277	64932519	chr15. 64925277. 64932519	ANKDD1A,ZNF609,MTFMT
chr15	72614438	72616569	chr15. 72614438. 72616569	PARP6
chr15	74155850	74160504	chr15. 74155850. 74160504	ISLR
chr15	74167251	74169130	chr15. 74167251. 74169130	ISLR
chr15	74211991	74213202	chr15. 74211991. 74213202	ISLR
chr15	74580019	74582248	chr15. 74580019. 74582248	FAM219B,COX5A,ARID3B,ULK3,SCAMP5
chr15	74954210	74959709	chr15. 74954210. 74959709	SCAMP5,FAM219B,COX5A,ARID3B,ULK3,SCAMP5
chr15	74995487	74998414	chr15. 74995487. 74998414	SCAMP5
chr15	75108067	75111894	chr15. 75108067. 75111894	SCAMP5
chr15	75123858	75126635	chr15. 75123858. 75126635	SCAMP5
chr15	75176478	75181128	chr15. 75176478. 75181128	SCAMP5
chr15	75208513	75211498	chr15. 75208513. 75211498	SCAMP5
chr15	76433710	76435288	chr15. 76433710. 76435288	ISL2,ETFA,SCAPER
chr15	80375260	80378525	chr15. 80375260. 80378525	MESDC2,ARNT2
chr15	95283403	95288222	chr15. 95283403. 95288222	MCTP2
chr15	95619987	95621625	chr15. 95619987. 95621625	MCTP2
chr15	95663509	95665033	chr15. 95663509. 95665033	MCTP2
chr15	95667040	95671228	chr15. 95667040. 95671228	MCTP2
chr15	95690160	95691661	chr15. 95690160. 95691661	MCTP2
chr15	95838866	95840926	chr15. 95838866. 95840926	MCTP2
chr15	96052414	96054856	chr15. 96052414. 96054856	MCTP2
chr15	96057300	96060214	chr15. 96057300. 96060214	MCTP2
chr15	96889789	96890501	chr15. 96889789. 96890501	MCTP2
chr15	98951960	98953298	chr15. 98951960. 98953298	SYNM
chr15	99323482	99325072	chr15. 99323482. 99325072	LYSMD4
chr15	99716580	99718312	chr15. 99716580. 99718312	LYSMD4
chr16	15153954	15154432	chr16. 15153954. 15154432	NOMO1
chr16	22174065	22175742	chr16. 22174065. 22175742	SDR42E2,C16orf52
chr16	22183330	22186162	chr16. 22183330. 22186162	SDR42E2,C16orf52
chr16	66872762	66873863	chr16. 66872762. 66873863	TK2,CKLF,CMTM4,PDP2
chr16	67474792	67475997	chr16. 67474792. 67475997	PLA2G15
chr16	67974329	67977492	chr16. 67974329. 67977492	PLA2G15
chr17	2221594	2224352	chr17. 2221594. 2224352	TSR1
chr17	3906428	3908277	chr17. 3906428. 3908277	P2RX1,CYB5D2,ENO3,DHX33
chr17	7216735	7218670	chr17. 7216735. 7218670	PER1,TMEM107
chr17	16915496	16916935	chr17. 16915496. 16916935	CCDC144A
chr17	16938676	16940988	chr17. 16938676. 16940988	CCDC144A
chr17	19316191	19318284	chr17. 19316191. 19318284	ALDH3A2
chr17	29571826	29574135	chr17. 29571826. 29574135	CPD
chr17	30000222	30001322	chr17. 30000222. 30001322	CPD
chr17	30299854	30301296	chr17. 30299854. 30301296	CPD
chr17	38440060	38444853	chr17. 38440060. 38444853	ARHGAP23,SOCS7
chr17	39737379	39740960	chr17. 39737379. 39740960	GRB7
chr17	40074724	40076183	chr17. 40074724. 40076183	NR1D1,THRA
chr17	44109618	44114882	chr17. 44109618. 44114882	G6PC3
chr17	44169783	44172224	chr17. 44169783. 44172224	G6PC3
chr17	50079258	50082006	chr17. 50079258. 50082006	ITGA3
chr17	64058647	64064901	chr17. 64058647. 64064901	TEX2
chr17	64098183	64103373	chr17. 64098183. 64103373	TEX2
chr17	66327811	66329722	chr17. 66327811. 66329722	PRKCA
chr17	66412030	66416950	chr17. 66412030. 66416950	PRKCA
chr17	66437014	66439288	chr17. 66437014. 66439288	PRKCA
chr17	66439331	66443909	chr17. 66439331. 66443909	PRKCA
chr17	68489680	68492566	chr17. 68489680. 68492566	WIPI1
chr17	74324921	74329070	chr17. 74324921. 74329070	CD300A
chr17	74331684	74337013	chr17. 74331684. 74337013	CD300A
chr17	74453563	74456007	chr17. 74453563. 74456007	CD300A
chr17	74462447	74463898	chr17. 74462447. 74463898	CD300A
chr17	74472730	74475081	chr17. 74472730. 74475081	CD300A
chr17	74766641	74768800	chr17. 74766641. 74768800	CD300A
chr17	74783192	74786735	chr17. 74783192. 74786735	CD300A
chr18	370580	372699	chr18. 370580. 372699	THOC1
chr18	804918	806461	chr18. 804918. 806461	ENOSF1,YES1
chr18	8680731	8681967	chr18. 8680731. 8681967	TWSG1
chr18	24491702	24493240	chr18. 24491702. 24493240	IMPACT,OSBPL1A
chr18	26180949	26182526	chr18. 26180949. 26182526	TAF4B
chr18	26448199	26449722	chr18. 26448199. 26449722	TAF4B
chr18	26453125	26454873	chr18. 26453125. 26454873	TAF4B
chr18	26547901	26550027	chr18. 26547901. 26550027	TAF4B
chr18	32468322	32471944	chr18. 32468322. 32471944	GAREM
chr18	46573863	46575957	chr18. 46573863. 46575957	CTIF
chr18	49531257	49532638	chr18. 49531257. 49532638	MYO5B
chr18	50319995	50321971	chr18. 50319995. 50321971	MYO5B
chr18	51361003	51362097	chr18. 51361003. 51362097	DCC
chr18	51629794	51632370	chr18. 51629794. 51632370	DCC
chr18	51766666	51768246	chr18. 51766666. 51768246	DCC
chr18	52151638	52152980	chr18. 52151638. 52152980	DCC
chr18	52190075	52190997	chr18. 52190075. 52190997	DCC
chr18	52394203	52398853	chr18. 52394203. 52398853	DCC
chr18	57975691	57977055	chr18. 57975691. 57977055	FECH,NARS
chr18	58760668	58761790	chr18. 58760668. 58761790	ZNF532
chr18	59021229	59021997	chr18. 59021229. 59021997	ZNF532
chr18	60145706	60146914	chr18. 60145706. 60146914	MC4R
chr18	60238317	60241089	chr18. 60238317. 60241089	MC4R
chr18	60245940	60249799	chr18. 60245940. 60249799	MC4R
chr18	60327786	60328758	chr18. 60327786. 60328758	MC4R
chr18	60371322	60374239	chr18. 60371322. 60374239	MC4R
chr18	60468021	60470872	chr18. 60468021. 60470872	MC4R
chr18	60555057	60555976	chr18. 60555057. 60555976	MC4R
chr18	63232261	63234001	chr18. 63232261. 63234001	KDSR,BCL2
chr18	63234308	63236648	chr18. 63234308. 63236648	KDSR,BCL2
chr18	74869418	74870776	chr18. 74869418. 74870776	ZADH2
chr19	2542216	2547988	chr19. 2542216. 2547988	ZNF555,IZUMO4
chr19	2644526	2646433	chr19. 2644526. 2646433	ZNF555,IZUMO4
chr19	7185349	7187227	chr19. 7185349. 7187227	ZNF358,INSR
chr19	7191163	7193641	chr19. 7191163. 7193641	ZNF358,INSR
chr19	10461428	10462167	chr19. 10461428. 10462167	EIF3G
chr19	10939006	10940443	chr19. 10939006. 10940443	C19orf52,RAB3D,LPPR2
chr19	11344338	11344919	chr19. 11344338. 11344919	C19orf52,RAB3D,LPPR2
chr19	14111879	14115145	chr19. 14111879. 14115145	CTB-55O6.8,PRKACA
chr19	16350777	16352588	chr19. 16350777. 16352588	NDUFB7
chr19	17382321	17383820	chr19. 17382321. 17383820	BST2,MRPL34,PGPEP1
chr19	18484448	18485804	chr19. 18484448. 18485804	KXD1,HOMER3
chr19	36135945	36137633	chr19. 36135945. 36137633	TMEM147,PSENEN,POLR2I,FXYD5,ZNF565,LSR
chr19	45427750	45428123	chr19. 45427750. 45428123	CD3EAP,C19orf83,OPA3
chr19	48891280	48892536	chr19. 48891280. 48892536	FTL,C19orf73
chr19	49563651	49565963	chr19. 49563651. 49565963	FTL,C19orf73
chr19	53990821	53992847	chr19. 53990821. 53992847	ZNF841,ZNF432,CACNG6
chr19	54161831	54162317	chr19. 54161831. 54162317	NDUFA3,MBOAT7
chr19	55305808	55311047	chr19. 55305808. 55311047	NDUFA3,MBOAT7
chr20	4148319	4150310	chr20. 4148319. 4150310	SMOX
chr20	9411152	9413416	chr20. 9411152. 9413416	LAMP5
chr20	9457223	9458126	chr20. 9457223. 9458126	LAMP5
chr20	9602316	9604643	chr20. 9602316. 9604643	LAMP5
chr20	9615013	9617185	chr20. 9615013. 9617185	LAMP5
chr20	10669731	10675587	chr20. 10669731. 10675587	MKKS,JAG1
chr20	11917258	11921626	chr20. 11917258. 11921626	BTBD3
chr20	11978555	11981113	chr20. 11978555. 11981113	BTBD3
chr20	11993114	11996465	chr20. 11993114. 11996465	BTBD3
chr20	12699325	12701470	chr20. 12699325. 12701470	BTBD3
chr20	17648671	17651317	chr20. 17648671. 17651317	RRBP1
chr20	36091783	36094946	chr20. 36091783. 36094946	EPB41L1
chr20	37412127	37413181	chr20. 37412127. 37413181	SRC
chr20	44670664	44673047	chr20. 44670664. 44673047	FITM2
chr20	46894019	46902491	chr20. 46894019. 46902491	EYA2
chr20	47384229	47384609	chr20. 47384229. 47384609	SULF2,EYA2
chr20	48540619	48545785	chr20. 48540619. 48545785	SULF2
chr20	50504342	50506099	chr20. 50504342. 50506099	SNAI1
chr20	57735229	57739613	chr20. 57735229. 57739613	PMEPA1
chr21	13943036	13944673	chr21. 13943036. 13944673	RBM11
chr21	13947177	13947757	chr21. 13947177. 13947757	RBM11
chr21	13949128	13950857	chr21. 13949128. 13950857	RBM11
chr21	31131313	31133857	chr21. 31131313. 31133857	TIAM1
chr21	31552426	31555767	chr21. 31552426. 31555767	TIAM1
chr21	31570951	31572676	chr21. 31570951. 31572676	TIAM1
chr21	31576503	31577912	chr21. 31576503. 31577912	TIAM1
chr21	33312478	33313964	chr21. 33312478. 33313964	TMEM50B
chr21	33683543	33687343	chr21. 33683543. 33687343	TMEM50B,ITSN1
chr21	33690093	33692518	chr21. 33690093. 33692518	TMEM50B,ITSN1
chr21	33712011	33713307	chr21. 33712011. 33713307	TMEM50B,ITSN1
chr21	33714874	33717091	chr21. 33714874. 33717091	TMEM50B,ITSN1
chr21	33733945	33735993	chr21. 33733945. 33735993	TMEM50B,ITSN1
chr21	34526032	34527743	chr21. 34526032. 34527743	SMIM11,RCAN1
chr21	43317471	43321202	chr21. 43317471. 43321202	NDUFV3,CBS,U2AF1
chr21	43700476	43701682	chr21. 43700476. 43701682	NDUFV3,CBS,U2AF1
chr21	45059857	45061670	chr21. 45059857. 45061670	UBE2G2,COL6A1,PCBP3
chr21	45717760	45720259	chr21. 45717760. 45720259	UBE2G2,COL6A1,PCBP3
chr22	17254549	17255337	chr22. 17254549. 17255337	CECR2
chr22	23236113	23238129	chr22. 23236113. 23238129	CHCHD10
chr22	35342433	35346634	chr22. 35342433. 35346634	RBFOX2,APOL6
chr22	35371185	35372651	chr22. 35371185. 35372651	RBFOX2,APOL6
chr22	35833470	35837478	chr22. 35833470. 35837478	RBFOX2,APOL6
chr22	35838607	35841389	chr22. 35838607. 35841389	RBFOX2,APOL6
chr22	35857435	35863196	chr22. 35857435. 35863196	RBFOX2,APOL6
chr22	35881324	35884080	chr22. 35881324. 35884080	RBFOX2,APOL6
chr22	35902275	35905200	chr22. 35902275. 35905200	RBFOX2,APOL6
chr22	35912151	35916639	chr22. 35912151. 35916639	RBFOX2,APOL6
chr22	36065243	36066736	chr22. 36065243. 36066736	RBFOX2,APOL6
chr22	36249467	36250835	chr22. 36249467. 36250835	APOL2,APOL1
chr22	38992616	38994507	chr22. 38992616. 38994507	MIEF1
chr22	39002400	39003939	chr22. 39002400. 39003939	MIEF1
chr22	41757376	41759157	chr22. 41757376. 41759157	CCDC134
chr22	41761663	41763246	chr22. 41761663. 41763246	CCDC134
chr22	43085691	43087022	chr22. 43085691. 43087022	SCUBE1
chr22	43376772	43379145	chr22. 43376772. 43379145	SCUBE1
chr22	44046753	44049406	chr22. 44046753. 44049406	SCUBE1
chr22	48021441	48022599	chr22. 48021441. 48022599	FAM19A5
chr22	48118310	48119626	chr22. 48118310. 48119626	FAM19A5
chr22	48321832	48322770	chr22. 48321832. 48322770	FAM19A5
chr22	48489444	48492489	chr22. 48489444. 48492489	FAM19A5
chr1	103516385	103518813	chr1.103516385.103518813	AMY2B,RNPC3
chr1	145813151	145814014	chr1.145813151.145814014	GPR89A,RNF115
chr2	192353872	192356392	chr2.192353872.192356392	NABP1,MYO1B
chr2	192480394	192481813	chr2.192480394.192481813	NABP1
chr4	12700612	12702373	chr4. 12700612. 12702373	RAB28
chr4	12723262	12724821	chr4. 12723262. 12724821	RAB28
chr4	22831035	22833211	chr4. 22831035. 22833211	GPR125,PPARGC1A
chr5	99944906	99946342	chr5. 99944906. 99946342	FAM174A
chr6	209151	210358	chr6. 209151. 210358	DUSP22
chr6	139580217	139581704	chr6.139580217.139581704	REPS1
chr6	139881688	139884956	chr6.139881688.139884956	REPS1
chr6	139940223	139941711	chr6.139940223.139941711	REPS1
chr7	120063545	120065561	chr7.120063545.120065561	ING3,CPED1
chr7	120241947	120242672	chr7.120241947.120242672	ING3,CPED1
chr8	63750577	63753121	chr8. 63750577. 63753121	GGH
chr9	22101829	22103873	chr9. 22101829. 22103873	KLHL9,CDKN2A,MTAP
chr12	67067542	67070807	chr12. 67067542. 67070807	TMBIM4,HELB,GRIP1
chr12	67201733	67203263	chr12. 67201733. 67203263	HELB,GRIP1
chr15	23370517	23372908	chr15. 23370517. 23372908	TUBGCP5,GOLGA8S,CYFIP1
chr15	23419839	23423245	chr15. 23419839. 23423245	TUBGCP5,GOLGA8S,CYFIP1
chr15	23435939	23438670	chr15. 23435939. 23438670	TUBGCP5,GOLGA8S,CYFIP1
chr17	64369603	64371724	chr17. 64369603. 64371724	DDX5,TEX2
chr17	64381959	64391589	chr17. 64381959. 64391589	DDX5,TEX2
