# Supplementary material for: Chromatin activation as a unifying principle underlying pathogenic mechanisms in multiple myeloma
Source: Genome Res. 2020 Sep;30(9):1217–27. doi: 10.1101/gr.265520.120 (PMC7545147; doi:10.1101/gr.265520.120)
Supplement: Supplemental Material [file supp_gr.265520.120_Supplemental_Table_S4.xlsx]

## Sheet: consensus_super_enh.filt
Supplemental Table S4. List of super-enhancers detected in the 1,556 de novo active chromatin regions.
SE_ID	chr	start	end	Detected by ROSE	Detected by size
SE.1	chr1	109388934	109398827	Yes
SE.2	chr1	114693258	114704428	Yes
SE.3	chr1	117752151	117761757	Yes
SE.4	chr1	147540221	147546877	Yes
SE.5	chr1	156122007	156127362	Yes
SE.6	chr1	162612366	162636056	Yes
SE.7	chr1	189149131	189154805	Yes
SE.8	chr1	201756056	201765330	Yes
SE.9	chr1	204677147	204688201	Included in SE.10	Yes
SE.10	chr1	204677148	204708264	Yes
SE.11	chr1	216527402	216532279	Yes
SE.12	chr1	217075962	217090617	Yes
SE.13	chr2	8678025	8685938	Yes
SE.14	chr2	9963939	9968906	Yes
SE.15	chr2	27152211	27171252	Yes
SE.16	chr2	40120722	40133941	Yes
SE.17	chr2	40159023	40165204	Yes
SE.18	chr2	50862564	50882839	Yes
SE.19	chr2	64270883	64279002	Yes
SE.20	chr2	80528505	80533623	Yes
SE.21	chr2	109634789	109645415	Yes
SE.22	chr2	111897407	111911546	Yes
SE.23	chr2	160344234	160371999	Yes
SE.24	chr2	160490441	160494627	Yes
SE.25	chr2	160665726	160668627	Yes
SE.26	chr2	186946623	186952706	Yes
SE.27	chr2	198004125	198008971	Yes
SE.28	chr2	202030801	202037849	Yes
SE.29	chr3	3096240	3103735	Yes
SE.30	chr3	38453131	38456473	Yes
SE.31	chr3	45602138	45619016	Yes
SE.32	chr3	46288357	46301759	Yes
SE.33	chr3	55480987	55489245	Yes
SE.34	chr3	96811660	96817409	Yes
SE.35	chr3	98709531	98746721	Yes
SE.36	chr3	98729259	98740903	included in SE.35	Yes
SE.37	chr3	98760551	98777761	Yes	Yes
SE.38	chr3	115097410	115101502	Yes
SE.39	chr3	182712589	182731103	Yes
SE.40	chr4	76299849	76308038	Yes
SE.41	chr4	104486333	104496367	Yes	Yes
SE.42	chr4	120918908	120925599	Yes
SE.43	chr4	122826250	122829642	Yes
SE.44	chr4	145481027	145489335	Yes
SE.45	chr4	169983973	169992343	Yes
SE.46	chr4	176122722	176135794	Yes
SE.47	chr5	6448512	6454440	Yes
SE.48	chr5	95858392	95863972	Yes
SE.49	chr6	7725566	7731713	Yes
SE.50	chr6	56807268	56815852	Yes
SE.51	chr6	56838235	56844635	Yes
SE.52	chr6	68633640	68642007	Yes
SE.53	chr6	106124519	106130726	Yes
SE.54	chr6	108607666	108640381	Yes
SE.55	chr6	108767497	108784783	Yes
SE.56	chr6	108894942	108901050	Yes
SE.57	chr6	128518986	128521556	Yes
SE.58	chr6	144713979	144720893	Yes
SE.59	chr7	81767983	81804858	Yes
SE.60	chr7	85023879	85040763	Yes
SE.61	chr7	111326900	111330073	Yes
SE.62	chr7	114082183	114088833	Yes
SE.63	chr7	116499029	116513237	Yes
SE.64	chr8	33594464	33600614	Yes
SE.65	chr8	71257745	71264765	Yes
SE.66	chr8	79721543	79738324	Yes
SE.67	chr8	93152728	93160381	Yes
SE.68	chr8	97595981	97599315	Yes
SE.69	chr8	106591438	106619019	Yes
SE.70	chr8	119903283	119953325	Yes
SE.71	chr8	119914602	119925080	Included in SE.70	Yes
SE.72	chr9	636683	655257	Yes
SE.73	chr9	12774737	12778387	Yes
SE.74	chr9	20350624	20384233	Yes
SE.75	chr9	20372678	20384233	Included in SE.74	Yes
SE.76	chr9	20439876	20443901	Yes
SE.77	chr10	15714159	15721291	Yes
SE.78	chr10	24448049	24468944	Yes
SE.79	chr10	34808454	34816264	Yes
SE.80	chr10	51875611	51880084	Yes
SE.81	chr10	52465449	52484902	Yes
SE.82	chr10	68559855	68563781	Yes
SE.83	chr10	81865087	81877524	Yes
SE.84	chr11	2774102	2780692	Yes
SE.85	chr11	22663654	22675612	Yes	Yes
SE.86	chr11	77456158	77472147	Yes
SE.87	chr11	95998882	96002391	Yes
SE.88	chr11	99066262	99072188	Yes
SE.89	chr11	120493829	120514031	Yes
SE.90	chr11	121057879	121072361	Yes
SE.91	chr12	11892420	11903367	Yes
SE.92	chr12	40760775	40773002	Yes
SE.93	chr12	41435377	41444889	Yes
SE.94	chr12	58918071	58921837	Yes
SE.95	chr13	113859587	113865047	Yes
SE.96	chr14	32937865	32940658	Yes
SE.97	chr14	51650571	51656211	Yes
SE.98	chr14	67184711	67190425	Yes
SE.99	chr14	69878759	69911408	Yes
SE.100	chr15	46110957	46122593	Yes
SE.101	chr15	64911455	64932519	Yes
SE.102	chr15	74995491	74998414	Yes
SE.103	chr15	75108068	75126635	Yes
SE.104	chr15	75176693	75181128	Yes
SE.105	chr15	95663510	95671228	Yes
SE.106	chr15	96052695	96060214	Yes
SE.107	chr17	39737445	39740960	Yes
SE.108	chr17	64058648	64064715	Yes
SE.109	chr17	64369733	64391589	Yes
SE.110	chr17	66437015	66443909	Yes
SE.111	chr17	74324922	74336896	Yes
SE.112	chr17	74453564	74475007	Yes
SE.113	chr18	60238318	60249787	Yes
SE.114	chr19	2542234	2547988	Yes
SE.115	chr20	9602317	9617185	Yes
SE.116	chr20	10669732	10675587	Yes
SE.117	chr20	46894053	46902491	Yes
SE.118	chr22	35833749	35841389	Yes
SE.119	chr22	35902276	35916639	Yes
