# Supplementary material for: Chromatin activation as a unifying principle underlying pathogenic mechanisms in multiple myeloma
Source: Genome Res. 2020 Sep;30(9):1217–27. doi: 10.1101/gr.265520.120 (PMC7545147; doi:10.1101/gr.265520.120)
Supplement: Supplemental Material [file supp_gr.265520.120_Supplemental_Table_S5.xlsx]

## Sheet: Hoja1
Supplemental Table S5. TFBS enrichment analysis by MEME. TF motifs analysis in 806 sites with increased chromatin accessibility in MM, within the 1,556 regions de novo active in MM.
Jaspar_MatrixID	TF name	p-value	FDR
MA0653.1	IRF9	3.86e-41	2.08e-38
MA1419.1	IRF4	4.6e-40	2.47e-37
MA0652.1	IRF8	1.2e-39	6.43e-37
MA0772.1	IRF7	1.5e-35	8.06e-33
MA1418.1	IRF3	8.59e-31	4.62e-28
MA0050.1	IRF1	9.65e-31	5.19e-28
MA0050.2	IRF1	4e-29	2.15e-26
MA0846.1	FOXC2	2.36e-28	1.27e-25
MA0593.1	FOXP2	6.56e-28	3.53e-25
MA0517.1	STAT1::STAT2	2.73e-26	1.47e-23
MA0052.2	MEF2A	4.34e-26	2.33e-23
MA0051.1	IRF2	1.9e-25	1.02e-22
MA0052.3	MEF2A	3.31e-25	1.78e-22
MA0032.2	FOXC1	3.53e-25	1.9e-22
MA0481.2	FOXP1	1.17e-24	6.32e-22
MA0497.1	MEF2C	6.55e-24	3.52e-21
MA0852.2	FOXK1	9.87e-24	5.31e-21
MA1103.1	FOXK2	1.97e-23	1.06e-20
MA0715.1	PROP1	2.37e-23	1.27e-20
MA0845.1	FOXB1	3.18e-23	1.71e-20
MA0084.1	SRY	3.8e-23	2.05e-20
MA0773.1	MEF2D	9.06e-23	4.88e-20
MA0052.1	MEF2A	1.1e-22	5.91e-20
MA0790.1	POU4F1	6.91e-22	3.72e-19
MA0849.1	FOXO6	9.84e-22	5.29e-19
MA0148.1	FOXA1	1.05e-21	5.65e-19
MA1152.1	SOX15	1.28e-21	6.91e-19
MA0148.2	FOXA1	1.45e-21	7.79e-19
MA0042.2	FOXI1	2.05e-21	1.11e-18
MA0791.1	POU4F3	2.26e-21	1.22e-18
MA0713.1	PHOX2A	2.46e-21	1.32e-18
MA0848.1	FOXO4	2.9e-21	1.56e-18
MA0660.1	MEF2B	1.07e-20	5.74e-18
MA0030.1	FOXF2	1.42e-20	7.66e-18
MA0137.1	STAT1	2.76e-20	1.49e-17
MA0042.1	FOXI1	3.24e-20	1.74e-17
MA0031.1	FOXD1	3.5e-20	1.88e-17
MA0683.1	POU4F2	4.55e-20	2.45e-17
MA0847.1	FOXD2	8.89e-20	4.78e-17
MA0033.2	FOXL1	9.9e-20	5.33e-17
MA0634.1	ALX3	1.74e-19	9.36e-17
MA0613.1	FOXG1	2.71e-19	1.46e-16
MA0033.1	FOXL1	3.55e-19	1.91e-16
MA0702.1	LMX1A	6.15e-19	3.31e-16
MA0036.3	GATA2	1.31e-18	7.06e-16
MA0757.1	ONECUT3	1.66e-18	8.92e-16
MA0718.1	RAX	2.23e-18	1.2e-15
MA0756.1	ONECUT2	2.61e-18	1.41e-15
MA1104.1	GATA6	5.88e-18	3.16e-15
MA0703.1	LMX1B	7.65e-18	4.12e-15
MA0037.2	GATA3	1.1e-17	5.9e-15
MA0046.2	HNF1A	1.37e-17	7.37e-15
MA0707.1	MNX1	1.51e-17	8.11e-15
MA0148.3	FOXA1	2.46e-17	1.32e-14
MA1420.1	IRF5	2.75e-17	1.48e-14
MA0495.2	MAFF	3.49e-17	1.88e-14
MA0481.1	FOXP1	5.56e-17	2.99e-14
MA0679.1	ONECUT1	5.76e-17	3.1e-14
MA0680.1	PAX7	6.38e-17	3.43e-14
MA0780.1	PAX3	1.04e-16	5.61e-14
MA0893.1	GSX2	1.12e-16	6.01e-14
MA0102.3	CEBPA	1.3e-16	6.99e-14
MA0868.1	SOX8	1.58e-16	8.52e-14
MA0866.1	SOX21	2.28e-16	1.23e-13
MA0716.1	PRRX1	2.45e-16	1.32e-13
MA0662.1	MIXL1	2.64e-16	1.42e-13
MA0867.1	SOX4	2.95e-16	1.59e-13
MA0725.1	VSX1	3.6e-16	1.94e-13
MA0157.2	FOXO3	3.64e-16	1.96e-13
MA0726.1	VSX2	3.67e-16	1.97e-13
MA0157.1	FOXO3	3.9e-16	2.1e-13
MA0628.1	POU6F1	4.73e-16	2.54e-13
MA0036.2	GATA2	5.63e-16	3.03e-13
MA0650.1	HOXA13	8.14e-16	4.38e-13
MA0850.1	FOXP3	1.03e-15	5.56e-13
MA0721.1	UNCX	1.07e-15	5.76e-13
MA0882.1	DLX6	2.37e-15	1.28e-12
MA0724.1	VENTX	3.02e-15	1.62e-12
MA0068.2	PAX4	4.46e-15	2.4e-12
MA0630.1	SHOX	5.78e-15	3.11e-12
MA0153.2	HNF1B	7.05e-15	3.8e-12
MA0124.1	NKX3-1	7.73e-15	4.16e-12
MA0894.1	HESX1	8.94e-15	4.81e-12
MA0766.1	GATA5	9.26e-15	4.98e-12
MA0153.1	HNF1B	9.93e-15	5.34e-12
MA0722.1	VAX1	1.44e-14	7.73e-12
MA0906.1	HOXC12	1.45e-14	7.82e-12
MA0468.1	DUX4	1.46e-14	7.85e-12
MA0717.1	RAX2	2.21e-14	1.19e-11
MA0025.1	NFIL3	2.52e-14	1.36e-11
MA1125.1	ZNF384	2.91e-14	1.57e-11
MA0037.3	GATA3	3.06e-14	1.64e-11
MA0892.1	GSX1	4.06e-14	2.18e-11
MA0793.1	POU6F2	4.16e-14	2.24e-11
MA1119.1	SIX2	4.73e-14	2.54e-11
MA0610.1	DMRT3	4.77e-14	2.57e-11
MA0466.1	CEBPB	5.1e-14	2.75e-11
MA0908.1	HOXD11	7.09e-14	3.82e-11
MA0888.1	EVX2	7.24e-14	3.9e-11
MA0644.1	ESX1	1.03e-13	5.52e-11
MA0466.2	CEBPB	1.37e-13	7.35e-11
MA0132.2	PDX1	1.44e-13	7.73e-11
MA0706.1	MEOX2	1.51e-13	8.12e-11
MA0909.1	HOXD13	1.57e-13	8.43e-11
MA0654.1	ISX	1.87e-13	1.01e-10
MA0723.1	VAX2	1.92e-13	1.04e-10
MA0675.1	NKX6-2	2.21e-13	1.19e-10
MA0837.1	CEBPE	2.5e-13	1.35e-10
MA0701.1	LHX9	2.53e-13	1.36e-10
MA0027.2	EN1	2.68e-13	1.44e-10
MA0887.1	EVX1	2.92e-13	1.57e-10
MA0113.1	NR3C1	2.94e-13	1.58e-10
MA0884.1	DUXA	3.81e-13	2.05e-10
MA0496.2	MAFK	3.97e-13	2.14e-10
MA0712.1	OTX2	4.56e-13	2.46e-10
MA0901.1	HOXB13	4.85e-13	2.61e-10
MA0902.1	HOXB2	4.85e-13	2.61e-10
MA0843.1	TEF	6.25e-13	3.36e-10
MA0903.1	HOXB3	7.74e-13	4.16e-10
MA0836.1	CEBPD	7.89e-13	4.25e-10
MA0658.1	LHX6	8.65e-13	4.65e-10
MA0495.1	MAFF	9.3e-13	5e-10
MA0890.1	GBX2	1.37e-12	7.35e-10
MA0465.1	CDX2	1.57e-12	8.44e-10
MA0886.1	EMX2	1.59e-12	8.54e-10
MA0659.1	MAFG	1.65e-12	8.89e-10
MA0674.1	NKX6-1	2.38e-12	1.28e-09
MA1118.1	SIX1	2.54e-12	1.37e-09
MA0899.1	HOXA10	2.69e-12	1.45e-09
MA0618.1	LBX1	3.07e-12	1.65e-09
MA0635.1	BARHL2	3.46e-12	1.86e-09
MA0754.1	CUX1	3.59e-12	1.93e-09
MA0809.1	TEAD4	3.73e-12	2.01e-09
MA0785.1	POU2F1	4.12e-12	2.22e-09
MA0651.1	HOXC11	4.13e-12	2.22e-09
MA0878.1	CDX1	4.58e-12	2.46e-09
MA0710.1	NOTO	5.48e-12	2.95e-09
MA0876.1	BSX	5.55e-12	2.99e-09
MA0612.1	EMX1	5.93e-12	3.19e-09
MA0875.1	BARX1	6.88e-12	3.7e-09
MA0788.1	POU3F3	7.94e-12	4.27e-09
MA0507.1	POU2F2	7.97e-12	4.29e-09
MA0158.1	HOXA5	7.99e-12	4.3e-09
MA0708.1	MSX2	8.23e-12	4.43e-09
MA0661.1	MEOX1	8.95e-12	4.81e-09
MA0905.1	HOXC10	1.17e-11	6.28e-09
MA0786.1	POU3F1	1.25e-11	6.7e-09
MA0889.1	GBX1	1.68e-11	9.03e-09
MA0489.1	JUN(var.2)	1.86e-11	9.98e-09
MA0508.1	PRDM1	1.86e-11	9.99e-09
MA0140.2	GATA1::TAL1	2.27e-11	1.22e-08
MA0523.1	TCF7L2	2.56e-11	1.38e-08
MA0508.2	PRDM1	2.6e-11	1.4e-08
MA0755.1	CUX2	2.72e-11	1.46e-08
MA0479.1	FOXH1	3.71e-11	1.99e-08
MA0700.1	LHX2	4.46e-11	2.4e-08
MA0891.1	GSC2	5.68e-11	3.06e-08
MA0907.1	HOXC13	7.35e-11	3.95e-08
MA0666.1	MSX1	8.19e-11	4.41e-08
MA0900.1	HOXA2	8.31e-11	4.47e-08
MA0784.1	POU1F1	8.54e-11	4.6e-08
MA0077.1	SOX9	9.93e-11	5.34e-08
MA0442.2	SOX10	1.05e-10	5.64e-08
MA0648.1	GSC	1.19e-10	6.4e-08
MA0787.1	POU3F2	1.29e-10	6.97e-08
MA0768.1	LEF1	1.58e-10	8.49e-08
MA0731.1	BCL6B	1.59e-10	8.58e-08
MA0144.2	STAT3	1.6e-10	8.6e-08
MA0699.1	LBX2	2.74e-10	1.48e-07
MA0037.1	GATA3	3.18e-10	1.71e-07
MA0137.3	STAT1	3.6e-10	1.94e-07
MA0838.1	CEBPG	4.83e-10	2.6e-07
MA1115.1	POU5F1	5.34e-10	2.87e-07
MA0043.2	HLF	6.21e-10	3.34e-07
MA0792.1	POU5F1B	8.94e-10	4.81e-07
MA0501.1	MAF::NFE2	9.55e-10	5.14e-07
MA0714.1	PITX3	1.12e-09	6.05e-07
MA0083.1	SRF	1.5e-09	8.07e-07
MA0639.1	DBP	2.62e-09	1.41e-06
MA0770.1	HSF2	2.78e-09	1.5e-06
MA0789.1	POU3F4	2.89e-09	1.55e-06
MA0486.2	HSF1	3.37e-09	1.81e-06
MA0895.1	HMBOX1	3.7e-09	1.99e-06
MA0743.1	SCRT1	4.58e-09	2.46e-06
MA0070.1	PBX1	4.61e-09	2.48e-06
MA0711.1	OTX1	5.55e-09	2.98e-06
MA1101.1	BACH2	7.52e-09	4.04e-06
MA0625.1	NFATC3	9.07e-09	4.88e-06
MA0817.1	BHLHE23	9.49e-09	5.1e-06
MA0667.1	MYF6	1.19e-08	6.4e-06
MA0678.1	OLIG2	1.41e-08	7.61e-06
MA0462.1	BATF::JUN	2.02e-08	1.09e-05
MA0090.2	TEAD1	2.28e-08	1.23e-05
MA1124.1	ZNF24	2.69e-08	1.45e-05
MA1105.1	GRHL2	2.73e-08	1.47e-05
MA1120.1	SOX13	2.76e-08	1.48e-05
MA0032.1	FOXC1	3.22e-08	1.73e-05
MA0498.2	MEIS1	3.38e-08	1.82e-05
MA0083.3	SRF	3.62e-08	1.95e-05
MA0804.1	TBX19	3.7e-08	1.99e-05
MA0083.2	SRF	6.25e-08	3.36e-05
MA0002.1	RUNX1	9.84e-08	5.29e-05
MA0647.1	GRHL1	1.13e-07	6.08e-05
MA0496.1	MAFK	1.6e-07	8.61e-05
MA0036.1	GATA2	1.65e-07	8.87e-05
MA0476.1	FOS	2.36e-07	0.000127
MA0665.1	MSC	3.09e-07	0.000166
MA1111.1	NR2F2	3.39e-07	0.000182
MA0873.1	HOXD12	4.49e-07	0.000242
MA0099.2	FOS::JUN	4.57e-07	0.000246
MA1150.1	RORB	5.39e-07	0.00029
MA0442.1	SOX10	6.39e-07	0.000344
MA0490.1	JUNB	7.35e-07	0.000395
MA0072.1	RORA(var.2)	7.98e-07	0.000429
MA1421.1	TCF7L1	1.03e-06	0.000553
MA0744.1	SCRT2	1.06e-06	0.000572
MA0477.1	FOSL1	1.17e-06	0.000631
MA0771.1	HSF4	1.29e-06	0.000694
MA0827.1	OLIG3	1.4e-06	0.000751
MA1138.1	FOSL2::JUNB	1.66e-06	0.000891
MA1141.1	FOS::JUND	1.76e-06	0.000948
MA1137.1	FOSL1::JUNB	2.45e-06	0.00132
MA0152.1	NFATC2	3.54e-06	0.0019
MA1151.1	RORC	3.65e-06	0.00196
MA1130.1	FOSL2::JUN	3.67e-06	0.00197
MA0826.1	OLIG1	3.87e-06	0.00208
MA0137.2	STAT1	3.94e-06	0.00212
MA1144.1	FOSL2::JUND	4.7e-06	0.00253
MA1112.1	NR4A1	5.11e-06	0.00274
MA1121.1	TEAD2	8.79e-06	0.00472
MA1134.1	FOS::JUNB	1.09e-05	0.00583
MA1128.1	FOSL1::JUN	1.25e-05	0.00671
MA0864.1	E2F2	1.3e-05	0.00698
MA0491.1	JUND	1.32e-05	0.00706
MA0752.1	ZNF410	1.35e-05	0.00724
MA0842.1	NRL	1.44e-05	0.00772
MA0833.1	ATF4	1.55e-05	0.00829
MA0071.1	RORA	1.71e-05	0.00915
MA0099.3	FOS::JUN	1.86e-05	0.00994
MA0141.3	ESRRB	2.02e-05	0.0108
MA1135.1	FOSB::JUNB	2.22e-05	0.0119
MA0150.1	NFE2L2	2.28e-05	0.0122
MA0777.1	MYBL2	2.5e-05	0.0134
MA0818.1	BHLHE22	3.02e-05	0.0161
MA1142.1	FOSL1::JUND	3.08e-05	0.0164
MA0486.1	HSF1	3.3e-05	0.0176
MA0914.1	ISL2	3.53e-05	0.0188
MA0800.1	EOMES	4.34e-05	0.0231
MA0808.1	TEAD3	4.48e-05	0.0238
MA0796.1	TGIF1	5.53e-05	0.0293
MA0691.1	TFAP4	5.57e-05	0.0295
MA0775.1	MEIS3	6.3e-05	0.0333
MA0802.1	TBR1	7.15e-05	0.0377
MA0484.1	HNF4G	8.48e-05	0.0446
MA0782.1	PKNOX1	8.79e-05	0.0462
MA0478.1	FOSL2	9.21e-05	0.0483
