# Supplementary material for: Chromatin activation as a unifying principle underlying pathogenic mechanisms in multiple myeloma
Source: Genome Res. 2020 Sep;30(9):1217–27. doi: 10.1101/gr.265520.120 (PMC7545147; doi:10.1101/gr.265520.120)
Supplement: Supplemental Material [file supp_gr.265520.120_Supplemental_Table_S6.xlsx]

## Sheet: Hoja1
Supplemental Table S6. Expression of all members of IRF, FOX and MEF2 transcription factor families. FPKM values from RNA-Seq of additional MM and normal B cell series are shown.
			FPKM values
	gene.ID	gene_name	MM_48086	MM_51078	MM_52305	MM_53225	MM_54639	MM_54647	MM_54746	MM_54847	MM_55051	MM_55138	MM_55220	MM_55282	MM_55338	MM_55389	MM_55576	MM_55624	MM_55658	MM_55706	MM_56357	MM_56417	MM_56525	MM_56605	MM_56766	MM_56878	MM_56945	MM_56965	MM_57075	MM_57224	MM_57991	MM_58089	MM_58105	MM_58166	MM_58177	MM_58183	MM_58281	MM_58410	MM_58592	Normal_BMPC_MO.101	Normal_BMPC_MO.98	Normal_BMPC_MO.99	Normal_GC_GC121611	Normal_GC_GC122311.2102	Normal_GC_RH.11.86GB.2102	Normal_GC_RH.11.88GB.2102	Normal_MEM_A3.4	Normal_MEM_A4.4	Normal_MEM_A5.5
IRF Family	ENSG00000125347.9	IRF1	11.4385	70.2549	53.433	19.9284	77.6855	32.2707	54.6993	27.2302	48.8757	15.6572	43.7608	102.071	38.9225	55.9431	48.8495	11.1431	127.99	37.3818	39.4104	49.3431	74.1772	47.3317	56.996	86.0024	51.5481	34.9555	266.467	29.4844	47.033	86.8173	103.809	138.023	245.819	118.798	19.9508	105.175	58.1628	19.7437	19.9866	23.6625	7.59553	9.86501	7.76999	7.13922	27.8272	28.7978	20.1237
	ENSG00000168310.6	IRF2	34.8559	23.6784	36.8172	41.86	17.0233	24.4878	15.5021	13.5895	24.2038	28.3482	17.4094	19.7566	21.9683	25.174	25.0846	10.5018	19.125	19.9997	17.9884	13.0905	20.086	5.29757	10.2028	15.3155	33.4494	16.0897	4.72503	16.3991	18.0133	14.3903	5.03647	7.24736	6.96766	16.5271	23.6835	22.8884	17.5144	10.1913	10.2743	13.9039	17.1302	20.52	15.5261	17.0977	13.6221	16.7122	14.541
	ENSG00000126456.11	IRF3	12.811	19.8058	16.887	17.3013	26.7973	1.15235	12.8987	12.3068	9.2701	15.7823	15.0864	17.3802	16.7	26.0224	1.5192	11.2173	15.6622	11.7514	11.4862	8.39934	17.758	3.0267	4.70164	11.3309	11.1196	11.9983	8.68295	11.0223	9.60329	19.1069	9.16504	20.1715	14.9721	13.3886	9.14465	17.5477	15.9396	12.7498	11.9823	13.6993	12.7997	12.0022	10.8367	13.6698	14.9922	18.321	15.6565
	ENSG00000137265.10	IRF4	231.932	278.12	243.347	130.178	123.616	137.918	175.609	55.4161	198.065	364.249	223.64	190.936	289.947	313.37	183.105	262.011	125.981	231.472	305.575	167.84	333.062	104.042	110.952	162.582	287.378	247.242	43.7477	157.08	144.67	251.9	84.8078	90.9006	202.577	196.42	247.866	333.65	116.673	167.537	154.832	93.8677	1.55426	2.37248	4.25532	4.73212	38.6051	30.0507	21.2549
	ENSG00000128604.14	IRF5	5.39483	21.1272	7.88545	4.74311	4.92557	0.980461	3.74238	6.14587	7.61443	4.70251	5.85802	9.80276	7.45068	5.56437	1.28532	7.35705	4.22732	5.98567	7.25067	5.53577	8.35908	1.20301	4.702	5.2995	10.2101	4.4057	1.72472	4.09297	6.86495	9.56592	3.9388	3.63236	3.58928	10.6297	2.18315	10.2293	6.56304	7.93378	5.31747	6.24483	4.05802	3.70795	2.94381	3.4885	8.39799	8.82279	7.6494
	ENSG00000117595.6	IRF6	0.292183	1.61923	0.542801	0.0883749	0	0.154928	0.0566307	0	0.465178	0.128158	0	8.17032	2.97601	0.0282231	0.205358	0	0	0.415048	0.0321345	0	0.128048	0	0.210139	0	0.517869	0.128372	0	0	0.102747	0	0.12843	0	0.968833	0.130264	0.136285	2.77203	0.0820812	0	0.341465	0.345996	0	0.0593909	0.0344569	0.103215	0.0476223	0.190652	0.0126747
	ENSG00000185507.15	IRF7	27.3239	11.6549	22.3479	2.25605	9.98708	0.0313891	12.0817	4.71748	1.79069	10.7497	9.75222	15.7802	9.45776	17.446	0.213976	11.6354	13.8143	13.4335	5.50797	1.84315	12.0013	0.546199	10.4005	12.2411	8.49873	5.77393	4.76206	8.84966	4.87117	21.8969	6.61571	16.868	14.029	10.8966	9.22585	11.9747	29.0734	12.3648	11.5595	10.3413	4.857	3.8084	4.24103	5.05471	6.62128	11.1535	8.2277
	ENSG00000140968.6	IRF8	0	0	0.132604	0.246121	0.963374	0.0639215	0.262858	0.0623816	0.0719725	0.118972	0.0827484	0.0249496	0.0789343	0.628803	0.027234	0.415693	0.829357	0.0642164	0	0.0493872	0.023774	0.463455	0.0278681	0.0561443	0.48075	0.0198618	1.53307	0	0.953823	0.144777	0.417286	0.081015	0.0264526	0.0151159	0.0158146	0	0.552434	0.786874	1.69521	0.684286	150.049	153.429	123.998	126.219	100.94	96.074	91.5645
	ENSG00000213928.4	IRF9	7.38081	5.70492	13.3147	1.5627	11.4325	3.17439	3.52867	5.3471	2.25224	6.85248	3.37755	8.14697	5.58457	7.02247	4.92815	6.55129	8.62096	4.1938	5.76341	4.26686	7.27789	8.89093	7.12829	8.45362	3.27047	3.29684	5.48142	5.468	3.5039	7.4852	6.89406	13.4476	15.512	9.72781	5.07797	11.0455	6.92013	3.30912	2.02517	2.52705	2.26327	4.31328	3.39461	3.55713	5.20291	6.46152	4.38639
FOX Family	ENSG00000129514.4	FOXA1	0	0	0	0	0	0	0	0	0	0	0	0	0	0	3.52224	0	0	0	0	0	0	0	0	0	0	0.0249395	0	0	0	0	0	0	0.8636	0	0	0	0	0	0	0	0	0.0115382	0	0.0171876	0	0	0
	ENSG00000125798.10	FOXA2	0	0	0	0	0	0	0	0	0	0	0	0	0	0	0	0	0	0	0	0	0	0	0	0	0	0	0	0	0	0	0	0	0	0	0	0	0	0	0	0	0	0	0	0	0	0	0
	ENSG00000170608.2	FOXA3	0	0	0	0.772796	0.126038	0	0	0	0	0	0	0	0.0929423	0	0.0641341	0.0815772	0.234369	0.0756124	0	0	0.111972	0	0.0656272	0	0	0.0935459	0	0	0	0	0	0	0	0	0.0372422	0	0.17944	0	0	0.0657732	0.0264686	0	0	0	0	0.0347325	0
	ENSG00000171956.5	FOXB1	0	0	0	0	0	0	0	0	0	0	0	0	0	0	0	0	0	0	0	0	0	0	0	0	0	0	0	0	0	0	0	0	0	0	0	0	0	0	0	0	0	0	0.0354329	0	0	0	0
	ENSG00000204612.1	FOXB2	0	0	0	0	0	0	0	0	0	0	0	0	0	0	0	0	0	0	0	0	0	0	0	0	0	0	0	0	0	0	0	0	0	0	0	0	0	0	0	0	0	0	0	0	0	0	0
	ENSG00000054598.5	FOXC1	0.0580273	0.276444	0.635452	0	0.320597	0.239312	1.12843	0.0467093	0.538906	0.148471	1.48702	0.0747258	0.118207	2.39337	0.122352	0.207505	0.695514	4.03898	0.0893465	0.998447	2.02933	0.138808	0.584267	0.28026	0	0.624617	1.92209	0.380113	9.57016	5.2034	1.33907	6.67275	0.63382	0.0226365	0.260511	0	5.22048	0.0535623	0.0619177	0	0.151486	0.192652	0.119755	0.163988	0.264817	0.132521	0.264304
	ENSG00000176692.4	FOXC2	0	0	0	0	0	0	0	0	0	0	0	0	0	0	0	0.106249	0	0	0	0	0	0	0.170951	0	0	0	0	0	0	0	0	0	0	0.0463625	0	0	0	0	0	0	0	0	0	0	0	0	0
	ENSG00000251493.2	FOXD1	0	0	0	0	0	0	0	0	0	0	0	0	0	0	0	0	0	0	0	0	0	0	0	0	0	0	0	0	0	0	0.0587025	0	0	0	0	0	0	0	0.0542873	0	0.0221362	0.0180975	0	0	0.0217671	0	0
	ENSG00000186564.5	FOXD2	0.042785	0	0	0	0	0.0176451	0.0193493	0.06888	0.02649	0	0	0	0	0.0867882	0	0.0382497	0	0	0	0.027266	0.0262506	0	0.0615422	0	0	0.0219308	0.0787336	0.0233556	0.315955	0.159858	0.0329111	0	0	0.033381	0.052386	0.0338263	0.105169	0.0789858	0.0304357	0.0154198	0.0620525	0.0304387	0	0.0453423	0.0366106	0.065141	0.0389757
	ENSG00000187140.4	FOXD3	0	0	0	0	0	0	0	0	0	0	0	0	0	0	0	0	0	0	0	0	0	0	0	0	0	0	0	0	0	0	0	0	0.0660293	0	0	0	0	0	0	0	0	0	0	0	0.0275878	0	0.02937
	ENSG00000170122.4	FOXD4	0.0917102	0.187247	0.251078	1.16504	0.633366	0	0.165902	0.516758	0.113563	0.187722	0.195849	0.236204	0.467055	0.558095	0	1.88574	0	0.151988	0.141209	0.467559	0.281342	0.548453	0.329791	0.132882	1.13784	0	0.421916	0.250315	0.451502	1.37063	0.141091	0.191747	0.187825	0.429316	0.52402	0.072507	0.270518	0	0	0.165262	0.212817	0.130491	0.113561	0.194383	0.0523169	0.0698153	0.194938
	ENSG00000184492.5	FOXD4L1	0.0967215	0.131653	0.0661993	0.204784	0.26719	0	0	0.0778564	0	0	0	0	0.0985152	0.58859	0	1.03762	0.165615	0	0.148925	0	0.059343	0.115684	0.0695623	0.186858	0	0	0.0889941	0	0	0	0.2976	0	0.264117	0.113194	0.157901	0	0	0.267837	0.0688041	0.174293	0.084167	0.0229369	0.0798441	0.102502	0.0275878	0.0368151	0
	ENSG00000204828.2	FOXD4L2	0	0	0	0	0	0	0	0	0	0	0	0	0	0	0	0	0	0	0	0	0	0	0	0	0	0	0	0	0	0	0	0	0	0	0	0	0	0	0	0	0	0	0	0	0	0	0
	ENSG00000187559.4	FOXD4L3	0	0	0	0.15541	0	0	0	0	0	0	0	0.0472624	0	0.0496312	0	0.131242	0.0628424	0	0	0.140332	0	0	0	0	0	0	0	0	0	0	0.0564621	0	0	0	0	0	0	0	0	0	0.0212914	0.0174068	0	0.0259297	0	0	0
	ENSG00000184659.4	FOXD4L4	0	0	0	0	0	0	0	0	0	0	0	0	0	0	0	0	0	0	0	0	0	0	0	0	0	0	0	0	0	0	0	0	0	0	0	0	0	0	0	0	0	0	0	0.0454541	0	0	0
	ENSG00000204779.2	FOXD4L5	0	0	0	0.408645	0.0888627	0	0	0	0	0	0	0.0414249	0.0655289	0	0	0.115032	0	0	0	0	0	0	0	0	0	0	0	0.0351198	0	0	0	0	0	0	0	0	0	0	0	0	0	0.0152569	0.0531095	0.022727	0	0	0
	ENSG00000204793.4	FOXD4L6	0.0734019	0	0	0	0	0	0	0	0	0	0.156751	0	0	0	0	0	0	0	0	0	0	0	0	0	0	0	0	0	0	0	0	0	0	0	0	0	0	0	0	0.0529082	0	0.0348136	0.0302968	0	0	0	0
	ENSG00000178919.7	FOXE1	0	0.0394462	0	0	0	0	0	0	0	0	0	0	0	0	0	0	0	0	0	0	0	0	0.041685	0	0	0	0	0	0	0	0	0	0	0	0	0	0	0	0	0	0.0168123	0.0687244	0.0717694	0	0.0330638	0.0441226	0.0703994
	ENSG00000186790.4	FOXE3	0	0	0	0	0	0	0	0	0	0	0	0.0650455	0.102894	0	0.071001	0	0.0864877	0	0	0	0	0	0	0.0487907	0	0	0	0	0.248668	0	0	0	0	0	0	0	0	0	0	0	0	0	0	0	0	0	0
	ENSG00000103241.5	FOXF1	0	0	0	0	0	0	0	0	0	0	0	0	0	0	0	0	0	0	0	0	0	0	0	0	0	0	0	0	0	0	0	0	0	0	0	0	0	0.0718961	0	0	0	0	0	0	0	0	0
	ENSG00000137273.3	FOXF2	0	0	0	0	0	0	0	0	0	0	0	0	0	0	0	0.0817637	0	0	0	0	0	0	0	0	0	0.0468799	0	0	0.225132	0	0	0	0	0	0	0	0	0	0	0	0	0	0	0	0	0	0.0277719
	ENSG00000176165.7	FOXG1	0	0	0	0	0	0	0	0	0	0	0	0	0	0	0	0	0	0	0	0	0	0	0	0	0	0	0	0	0.357562	0	0	0	0	0	0	0	0	0	0	0	0	0	0.0899333	0.0256566	0	0	0.0220541
	ENSG00000160973.7	FOXH1	0.0799121	0	0	0	0	0	0.10842	0.0643256	0	0.0408932	0	0.0514543	0	0	0	0.0714412	0	0	0.0615217	0.152779	0	0	0.114946	0	0	0.0409614	0	0.0436226	0	0	0.0614699	0	0	0.0311738	0.0652296	0.0631793	0.0392862	0	0.0852699	0.0864013	0	0.0189507	0.0329839	0	0.0683798	0.0304169	0.0485314
	ENSG00000168269.7	FOXI1	0	0.176791	0.118528	0	0	0	0.195797	0.2091	0.428886	0.177239	0.369825	0	0	0.175643	0.121716	0	0.444794	0.21525	0.0666618	0.0551811	0.106252	0.20713	0.249099	0.0418206	0	0.887674	0.478025	0.0945345	0.213144	0.647046	0.199817	0	0.118224	0	0	0	0.510822	0	0.184788	0.530514	0	0	0	0	0	0.0659165	0.0788793
	ENSG00000186766.7	FOXI2	0	0	0	0	0	0	0	0	0	0	0	0	0	0	0.218499	0	0	0	0	0	0	0	0	0	0	0	0	0	0	0	0	0	0	0	0.0507521	0	0	0	0	0	0	0	0	0	0	0	0
	ENSG00000214336.3	FOXI3	0	0	0	0	0	0	0.135012	0	0	0	0	0	0	0	0	0	0	0.123688	0	0	0	0	0	0	0	0.0765122	0.274686	0	0	1.67314	0	0	0	0	0	0	0.146766	0	0	0	0.0432978	0	0.061611	0.0527301	0	0	0.0453262
	ENSG00000129654.7	FOXJ1	0.0757365	0	0.103673	2.56565	0.209219	0	0	0	0.0937832	0	0	0.390125	0	0	0	0.135416	0.583571	0	0.58307	0.241326	0.278806	0	0	0.0365792	0	0.116463	0.627171	0.0413432	0.186431	0	0.524321	0.158349	0	0.413629	0.154553	0.179634	0.4468	1.11854	1.45466	2.4566	0	0	0.0312604	0.0267544	0.0432045	0.23062	0
	ENSG00000065970.4	FOXJ2	4.38417	3.74051	5.87088	1.88338	2.10628	4.97879	1.98272	3.75922	1.96697	2.55239	3.05299	4.76621	3.10642	2.81402	3.21534	2.44255	2.66551	1.23728	3.03281	3.38107	4.98994	2.58386	2.51335	4.63387	2.36496	2.89862	2.57235	3.81532	4.30114	3.67971	4.59427	2.85619	2.94959	8.81163	3.06001	7.63562	3.29548	2.66856	2.57635	1.79761	0.79251	1.23556	0.970354	1.24572	2.13853	2.3822	2.17056
	ENSG00000198815.4	FOXJ3	13.3772	11.8098	13.9621	11.919	11.5832	19.6982	7.1915	15.1594	10.5641	12.4733	11.774	17.8434	10.2264	8.90777	20.1094	8.27545	12.372	7.5261	10.7231	11.3174	14.4389	21.3101	11.0192	10.4552	15.841	6.49993	21.0926	10.2645	12.643	8.45675	18.5042	9.58588	14.1442	19.4136	9.99562	16.8393	6.40529	7.68731	8.18465	8.13637	10.9002	10.8451	11.8574	11.5116	8.80645	9.33307	9.17268
	ENSG00000164916.9	FOXK1	1.92456	6.45766	2.18517	3.82208	4.55408	1.80277	1.34267	3.73485	1.95825	2.30562	2.10276	4.95679	5.33371	3.44997	0.996143	1.81391	3.16767	1.16206	2.53834	6.75039	3.52411	1.14202	0.686709	2.73092	3.70199	1.7818	6.1223	2.23147	3.63571	6.13166	3.93628	1.65321	3.96191	7.08871	2.8131	4.45857	2.42038	4.00739	2.50995	1.86577	3.46635	3.308	3.86099	3.67337	3.46386	4.00344	3.37051
	ENSG00000141568.15	FOXK2	6.32454	5.14419	8.28791	12.7374	6.21439	2.84158	2.89512	10.3475	4.52066	3.85478	4.83149	9.33645	6.33709	5.09342	2.74659	5.92993	5.65683	4.36725	3.6221	6.66833	6.54619	4.182	3.45769	6.6556	8.29336	3.66354	6.03215	4.75765	4.873	6.62806	6.84258	4.30025	3.12412	8.63525	4.1342	6.87025	4.75235	4.95984	5.45007	4.75332	2.6474	2.77407	2.6423	2.67012	2.73525	2.93574	3.12273
	ENSG00000176678.4	FOXL1	0	0	0	0.129271	0	0	0	0	0	0	0	0	0	0	0	0	0.0522728	0.0505929	0	0	0	0	0	0.0294889	0	0	0	0	0	0	0.0469656	0	0	0	0.024919	0	0.0300163	0	0	0.0220047	0	0	0	0	0	0	0
	ENSG00000183770.5	FOXL2	0	0	0	0	0	0	0	0	0	0	0	0	0	0	0	0	0	0	0	0	0	0	0	0	0	0	0	0	0	0	0	0	0	0	0	0	0	0	0	0	0	0	0.0283026	0	0	0	0
	ENSG00000111206.8	FOXM1	1.25431	1.10974	1.88867	2.7442	2.65648	0.103458	0.510528	1.31256	0.155319	0.213954	0	2.39597	0.127757	1.44178	0.440788	1.98104	0.966478	0.103935	4.44198	0.692763	0.0769574	0.650096	0.42098	0.666384	4.66862	0.278604	0.307759	0.890115	0.514594	1.56216	1.44725	0.262249	1.11317	1.51685	0.29009	0.264444	0.698857	0	0.312294	0.105479	12.0792	11.4023	12.6841	13.0121	7.58461	5.95191	9.59808
	ENSG00000109101.3	FOXN1	0	0	0	0	0	0	0	0	0	0	0	0	0	0	0	0	0	0	0	0	0	0	0	0	0	0	0	0	0	0	0	0	0	0	0	0	0	0	0	0	0	0	0	0	0	0	0
	ENSG00000170802.11	FOXN2	11.0575	17.1123	17.9836	12.208	10.5348	34.5254	8.73058	11.4858	21.9619	22.6523	15.041	9.65749	9.40404	9.08049	29.4707	8.12361	21.9329	19.9278	7.69803	11.3956	10.1204	37.4064	18.8185	7.56135	10.8665	10.363	16.8896	7.03214	10.3306	16.6348	30.7662	11.3687	16.0191	30.9351	13.9111	17.5132	5.74104	7.64657	8.43701	6.86547	11.4641	10.8437	12.3514	11.3574	14.1666	14.5155	13.2533
	ENSG00000053254.11	FOXN3	15.1923	13.0416	18.1781	20.8042	10.0163	33.7051	9.57627	23.5243	21.6634	19.3616	12.3115	11.8833	28.0121	17.2228	23.6491	10.4538	13.3482	7.78162	12.2543	24.5047	18.2753	32.2652	17.0806	13.2392	14.1705	11.9597	18.6659	11.7669	19.0109	17.0019	22.8425	15.7303	14.0101	27.214	17.2326	27.2043	7.87878	11.1785	9.73685	8.03004	18.5001	19.6647	21.7603	21.5055	11.5261	13.4836	14.3021
	ENSG00000139445.13	FOXN4	0	0	0	0	0	0	0	0	0	0	0	0	0	0	0	0	0	0	0	0	0	0	0	0	0	0	0	0	0	0	0	0.240968	0.118019	0.02248	0	0	0	0	0	0	0	0	0	0	0	0	0
	ENSG00000150907.6	FOXO1	10.1542	6.77012	32.1813	7.87079	8.65288	12.5915	10.1495	16.0425	25.5098	21.3659	16.7595	6.93706	12.7966	9.35613	9.55599	9.8471	5.89384	10.3536	8.34735	5.08908	8.21521	17.0441	19.854	9.14353	7.25997	15.3322	12.9217	12.3449	14.1498	20.5772	15.0391	13.3858	17.6707	14.2333	7.47371	10.967	9.13783	11.8193	13.6631	9.21717	40.9059	39.2627	40.5051	40.1139	24.957	20.7137	23.8935
	ENSG00000118689.10	FOXO3	5.2071	59.4869	14.7166	57.921	29.8066	26.7846	22.2835	47.1489	48.3911	46.2529	24.674	28.2067	44.9097	43.1432	36.9617	33.0723	30.0972	21.2518	35.4407	46.5232	18.6124	86.1383	21.0538	14.2512	43.0693	44.2851	48.6498	22.6549	50.8879	39.1043	20.864	49.7224	43.559	18.2109	12.1379	31.1319	30.4131	30.6321	29.4212	33.5462	1.26243	1.59115	1.05858	1.32696	2.60837	3.03706	2.21048
	ENSG00000184481.12	FOXO4	3.30756	2.80393	6.83111	5.52862	4.64865	2.41705	2.38807	6.4926	4.27532	5.46372	3.9654	5.52971	6.20586	3.45273	2.81409	3.94259	3.42789	2.8369	3.61853	4.03077	2.955	2.29033	3.0048	3.95166	10.7991	2.5877	4.912	3.64275	3.71379	6.93786	3.79403	5.3382	9.8242	4.2104	2.93667	8.62486	3.33768	3.16018	2.95141	2.7187	1.71684	1.74762	1.4131	1.59888	1.90337	2.05408	1.70917
	ENSG00000204060.4	FOXO6	0	0	0.0570893	0	0.11521	0	0	0	0	0	0	0	0.169916	0.112798	0	0	0.0714118	0	0	0	1.84236	0	0	0	2.06975	0.0427549	0.0767472	0.227663	0	0	1.28323	0	2.61936	0.585699	0.408514	2.83566	0	0	0.0296678	0.060123	0	0.0197805	0	0	0	0.0317488	0
	ENSG00000114861.14	FOXP1	6.36339	2.19086	10.217	3.6456	2.10944	1.13001	0.988612	5.4597	2.59566	2.91919	0.511592	1.63892	2.13505	3.83695	2.54666	1.09761	1.65362	0.980137	0.461079	1.34539	0.900269	4.28005	1.38912	4.9825	10.2171	1.03608	2.60375	0.743772	3.05907	1.34262	8.89133	0.594789	9.65928	0.829403	1.07551	3.19614	0.898021	1.28531	1.25682	1.10082	12.7078	13.1056	13.2747	14.0217	10.2197	9.44902	6.75159
	ENSG00000128573.18	FOXP2	2.37003	1.03507	5.29141	3.00539	3.0985	5.43596	1.83415	2.88715	7.68217	4.15726	2.73361	51.7298	0.12909	4.87609	5.38028	1.0424	4.17752	2.20542	8.53758	4.49879	5.94866	5.12365	1.73187	0.318305	3.77386	5.09319	2.82205	2.24159	1.21671	2.50975	2.34952	6.75712	2.88117	2.15564	1.63456	5.28061	0.17446	0.421154	0.288505	0.685155	0	0.00300555	0	0.00895429	0	0	0.0038485
	ENSG00000049768.10	FOXP3	0	0	0	0	0	0.0319979	0	0.0624542	0	0.0397035	0	0	0	0.0524612	0	0	0	0.0642911	0	0.0494447	0	0	0	0.0749461	0	0	0	0	0	0	0.0596816	0	0	0	0.15833	0	0	0	0.0275964	0	0.0900219	0.0183994	0.160122	0.137041	0.0442603	0.029532	0
	ENSG00000137166.10	FOXP4	1.13464	1.21346	1.1094	1.78457	1.29853	0.0133696	0.381185	1.69618	0.321143	0.796283	0.761527	1.69076	1.28775	1.22751	0	0.84047	0.527337	0.322352	1.22292	1.01231	0.87516	0.155096	0.442989	1.37784	1.20663	0.398806	1.10364	0.920218	1.43639	1.57462	1.4962	2.3045	1.94753	1.84637	1.13786	0.820163	1.1953	1.2568	1.61428	0.525759	1.83367	1.40686	1.98034	1.83231	2.83871	3.70179	2.83505
	ENSG00000164379.4	FOXQ1	0	0	0	0	0	0	0	0	0	0	0	0	0	0	0	0	0	0	0	0	0	0	0	0	0	0	0	0	0	0	0	0	0	0	0.176089	0	0	0	0	0	0	0	0	0	0	0	0
	ENSG00000176302.8	FOXR1	0	0	0	0	0	0	0	0	0	0	0	0	0	0	0	0	0	0	0	0	0	0	0	0	0	0	0.148779	0	0	0	0	0	0	0	0	0	0	0	0	0	0	0	0	0	0	0	0
	ENSG00000189299.5	FOXR2	0	0	0	0	0	0	0	0	0	0	0	0	0	0	0	0	0	0	0	0	0	0	0	0	0	0	0	0	0	0	0	0	0	0	0	0	0	0	0	0	0	0	0	0	0	0	0
	ENSG00000179772.6	FOXS1	0	0	0	0	0	0	0	0	0	0	0	0	0	0	0	0	0	0	0	0	0	0	0	0	0	0	0	0	0	0	0	0	0	0	0	0	0	0	0	0	0	0	0	0.0536103	0	0	0
MEF2 Family	ENSG00000068305.13	MEF2A	13.0596	22.4235	28.6263	32.1685	13.519	35.7773	14.1413	17.0626	28.2209	33.4585	18.1067	29.3304	13.7365	17.7569	42.6145	14.5496	37.0748	18.4839	26.6359	39.4916	29.2751	31.7506	44.0978	14.3878	22.5924	15.8092	75.5794	15.6248	21.1513	26.0452	22.3238	20.3448	24.0659	32.3767	10.7182	23.8219	11.2461	12.2123	12.4375	11.2899	18.9326	18.5821	23.6285	20.0014	17.7972	18.1291	17.4176
	ENSG00000213999.11	MEF2B	0.146858	0.299843	0.301542	0.155467	0.507111	0.0302829	0.365286	0.768389	0.0454628	0.150302	1.41128	0.378238	0.299162	1.09229	0	0.853386	0.0628655	0.12169	0.113061	0.0935891	0.180208	0.263475	0	0.567433	0.911024	0.112914	0.0675623	0.681419	0	0.274353	0.0564828	1.22819	0	5.29927	0.0899062	0.406375	0.541483	0.0677787	0.182821	0.105855	5.85729	4.73639	5.18265	5.60286	1.86402	1.34156	4.08035
	ENSG00000081189.9	MEF2C	75.4743	66.9892	55.9819	37.283	27.5267	80.9234	36.501	45.8674	55.6756	71.8287	57.9407	71.6575	57.2954	47.3574	104.943	55.5434	25.9337	74.2939	56.0299	47.0843	72.1715	24.127	64.022	24.0634	63.8705	50.1024	42.6709	44.6857	59.7166	65.0505	25.765	21.8038	32.1273	25.8485	26.7367	123.848	28.0781	27.3895	25.9882	28.6821	51.7256	56.8123	53.878	51.9733	37.7991	42.0824	43.4747
	ENSG00000116604.13	MEF2D	37.6913	21.8869	25.9255	23.7553	51.6287	5.72279	11.1942	18.7925	11.3392	10.0756	12.4807	19.8417	25.1797	18.8286	9.75287	25.5373	18.4089	9.84096	16.5778	46.8645	18.0055	12.4851	12.902	27.4571	35.6734	18.679	22.2861	14.5015	19.8484	29.5432	31.6854	18.2309	59.8253	51.1694	24.516	23.523	20.0508	15.3762	15.8517	12.9645	9.80886	9.36072	10.0489	10.654	9.90379	11.9197	10.4107
[truncated: 12 more columns]
