# Supplementary material for: Chromatin activation as a unifying principle underlying pathogenic mechanisms in multiple myeloma
Source: Genome Res. 2020 Sep;30(9):1217–27. doi: 10.1101/gr.265520.120 (PMC7545147; doi:10.1101/gr.265520.120)
Supplement: Supplemental Material [file supp_gr.265520.120_Supplemental_Table_S7.xlsx]

## Sheet: GO_GOrilla
Supplemental Table S7. Functional categories analyses associated with 1,059 genes related to de novo activated regions in MM. Common terms between all the methods, belonging to one of three main categories: 1) related to ossification/osteoblast differentiation, 2) related to main signaling pathways or 3) related to oxidative stress or stress response, are highlighted in different color
ossification/osteoblast differentiation
signaling pathways
oxidative stress and stress response
GO Term	Description	P-value	FDR q-value	Enrichment	Genes
GO:0007167	enzyme linked receptor protein signaling pathway	2.97e-10	4.54e-06	2.11	[TIAM1 - t-cell lymphoma invasion and metastasis 1, NCKAP1 - nck-associated protein 1, DDX5 - dead (asp-glu-ala-asp) box helicase 5, F11R - f11 receptor, GDF9 - growth differentiation factor 9, TRAT1 - t cell receptor associated transmembrane adaptor 1, RHOQ - ras homolog family member q, CTGF - connective tissue growth factor, PIK3R3 - phosphoinositide-3-kinase, regulatory subunit 3 (gamma), GAB…
GO:0045778	positive regulation of ossification	4.91e-10	3.76e-06	4.78	[IFITM1 - interferon induced transmembrane protein 1, P2RX7 - purinergic receptor p2x, ligand-gated ion channel, 7, TGFB2 - transforming growth factor, beta 2, SUCO - sun domain containing ossification factor, SMAD1 - smad family member 1, IGF1 - insulin-like growth factor 1 (somatomedin c), ACVR2A - activin a receptor, type iia, ACVR2B - activin a receptor, type iib, DDR2 - discoidin domain rece…
GO:0050793	regulation of developmental process	1.93e-08	9.86e-05	1.45	[GFI1 - growth factor independent 1 transcription repressor, GDF9 - growth differentiation factor 9, LRRC16A - leucine rich repeat containing 16a, CD274 - cd274 molecule, CORO1C - coronin, actin binding protein, 1c, RELA - v-rel avian reticuloendotheliosis viral oncogene homolog a, SPINT1 - serine peptidase inhibitor, kunitz type 1, ABL2 - c-abl oncogene 2, non-receptor tyrosine kinase, DKK1 - di…
GO:0030278	regulation of ossification	3.24e-08	0.000124	3.02	[IFITM1 - interferon induced transmembrane protein 1, SMOC1 - sparc related modular calcium binding 1, DDX5 - dead (asp-glu-ala-asp) box helicase 5, SUCO - sun domain containing ossification factor, PRKACA - protein kinase, camp-dependent, catalytic, alpha, ACVR2A - activin a receptor, type iia, ACVR2B - activin a receptor, type iib, DDR2 - discoidin domain receptor tyrosine kinase 2, PTCH1 - pat…
GO:0045669	positive regulation of osteoblast differentiation	5.68e-08	0.000174	5	[IFITM1 - interferon induced transmembrane protein 1, SUCO - sun domain containing ossification factor, SMAD1 - smad family member 1, IGF1 - insulin-like growth factor 1 (somatomedin c), ACVR2A - activin a receptor, type iia, ACVR2B - activin a receptor, type iib, DDR2 - discoidin domain receptor tyrosine kinase 2, ATRAID - all-trans retinoic acid-induced differentiation factor, ACVR1 - activin a…
GO:0051270	regulation of cellular component movement	8.27e-08	0.000211	1.78	[TIAM1 - t-cell lymphoma invasion and metastasis 1, IFITM1 - interferon induced transmembrane protein 1, CCSAP - centriole, cilia and spindle-associated protein, CTNNA3 - catenin (cadherin-associated protein), alpha 3, FN1 - fibronectin 1, DOCK4 - dedicator of cytokinesis 4, PFN2 - profilin 2, SLC8A1 - solute carrier family 8 (sodium/calcium exchanger), member 1, LRRC16A - leucine rich repeat con…
GO:0051239	regulation of multicellular organismal process	1e-07	0.000219	1.39	[GFI1 - growth factor independent 1 transcription repressor, CTNNA3 - catenin (cadherin-associated protein), alpha 3, AKAP9 - a kinase (prka) anchor protein (yotiao) 9, DHX33 - deah (asp-glu-ala-his) box polypeptide 33, GDF9 - growth differentiation factor 9, CD274 - cd274 molecule, CORO1C - coronin, actin binding protein, 1c, RELA - v-rel avian reticuloendotheliosis viral oncogene homolog a, BST…
GO:2000145	regulation of cell motility	1.13e-07	0.000216	1.81	[TIAM1 - t-cell lymphoma invasion and metastasis 1, IFITM1 - interferon induced transmembrane protein 1, CCSAP - centriole, cilia and spindle-associated protein, FN1 - fibronectin 1, DOCK4 - dedicator of cytokinesis 4, PFN2 - profilin 2, SLC8A1 - solute carrier family 8 (sodium/calcium exchanger), member 1, LRRC16A - leucine rich repeat containing 16a, CD274 - cd274 molecule, IL12A - interleukin …
GO:0042221	response to chemical	1.49e-07	0.000253	1.41	[RSRC1 - arginine/serine-rich coiled-coil 1, GFI1 - growth factor independent 1 transcription repressor, TRIM24 - tripartite motif containing 24, AKAP9 - a kinase (prka) anchor protein (yotiao) 9, CD274 - cd274 molecule, RELA - v-rel avian reticuloendotheliosis viral oncogene homolog a, BST2 - bone marrow stromal cell antigen 2, ENO3 - enolase 3 (beta, muscle), SPINT1 - serine peptidase inhibitor…
GO:0045667	regulation of osteoblast differentiation	1.93e-07	0.000296	3.53	[ID2 - inhibitor of dna binding 2, dominant negative helix-loop-helix protein, IFITM1 - interferon induced transmembrane protein 1, TWSG1 - twisted gastrulation homolog 1 (drosophila), SMOC1 - sparc related modular calcium binding 1, DDX5 - dead (asp-glu-ala-asp) box helicase 5, PRKACA - protein kinase, camp-dependent, catalytic, alpha, SUCO - sun domain containing ossification factor, SMAD1 - sm…
GO:0007166	cell surface receptor signaling pathway	2.22e-07	0.000308	1.45	[IFITM1 - interferon induced transmembrane protein 1, DST - dystonin, SEL1L - sel-1 suppressor of lin-12-like (c. elegans), PSENEN - presenilin enhancer 2 homolog (c. elegans), LPHN2 - latrophilin 2, DDX5 - dead (asp-glu-ala-asp) box helicase 5, FN1 - fibronectin 1, ITGA8 - integrin, alpha 8, F11R - f11 receptor, GDF9 - growth differentiation factor 9, WDR19 - wd repeat domain 19, TRAT1 - t cell …
GO:0045595	regulation of cell differentiation	2.48e-07	0.000316	1.51	[IFITM1 - interferon induced transmembrane protein 1, GFI1 - growth factor independent 1 transcription repressor, PDLIM5 - pdz and lim domain 5, DDX5 - dead (asp-glu-ala-asp) box helicase 5, FN1 - fibronectin 1, CAMSAP2 - calmodulin regulated spectrin-associated protein family, member 2, LRRC16A - leucine rich repeat containing 16a, IL12A - interleukin 12a (natural killer cell stimulatory factor …
GO:2000026	regulation of multicellular organismal development	2.49e-07	0.000293	1.48	[GFI1 - growth factor independent 1 transcription repressor, PDLIM5 - pdz and lim domain 5, DDX5 - dead (asp-glu-ala-asp) box helicase 5, FN1 - fibronectin 1, CAMSAP2 - calmodulin regulated spectrin-associated protein family, member 2, GDF9 - growth differentiation factor 9, CD274 - cd274 molecule, IL12A - interleukin 12a (natural killer cell stimulatory factor 1, cytotoxic lymphocyte maturation …
GO:0040012	regulation of locomotion	2.88e-07	0.000314	1.74	[TIAM1 - t-cell lymphoma invasion and metastasis 1, IFITM1 - interferon induced transmembrane protein 1, CCSAP - centriole, cilia and spindle-associated protein, CHMP4C - charged multivesicular body protein 4c, FN1 - fibronectin 1, DOCK4 - dedicator of cytokinesis 4, PFN2 - profilin 2, SLC8A1 - solute carrier family 8 (sodium/calcium exchanger), member 1, LRRC16A - leucine rich repeat containing …
GO:0030334	regulation of cell migration	4.83e-07	0.000492	1.8	[TIAM1 - t-cell lymphoma invasion and metastasis 1, IFITM1 - interferon induced transmembrane protein 1, FN1 - fibronectin 1, DOCK4 - dedicator of cytokinesis 4, PFN2 - profilin 2, SLC8A1 - solute carrier family 8 (sodium/calcium exchanger), member 1, LRRC16A - leucine rich repeat containing 16a, CD274 - cd274 molecule, IL12A - interleukin 12a (natural killer cell stimulatory factor 1, cytotoxic …
GO:0051094	positive regulation of developmental process	5.61e-07	0.000536	1.58	[IFITM1 - interferon induced transmembrane protein 1, FN1 - fibronectin 1, LRRC16A - leucine rich repeat containing 16a, CD274 - cd274 molecule, IL12A - interleukin 12a (natural killer cell stimulatory factor 1, cytotoxic lymphocyte maturation factor 1, p35), CORO1C - coronin, actin binding protein, 1c, RELA - v-rel avian reticuloendotheliosis viral oncogene homolog a, SPINT1 - serine peptidase i…
GO:0010646	regulation of cell communication	7.74e-07	0.000658	1.32	[GFI1 - growth factor independent 1 transcription repressor, FAM13A - family with sequence similarity 13, member a, TRIM24 - tripartite motif containing 24, DHX33 - deah (asp-glu-ala-his) box polypeptide 33, GDF9 - growth differentiation factor 9, THEM4 - thioesterase superfamily member 4, RELA - v-rel avian reticuloendotheliosis viral oncogene homolog a, BST2 - bone marrow stromal cell antigen 2…
GO:0030335	positive regulation of cell migration	7.74e-07	0.000696	2.06	[TIAM1 - t-cell lymphoma invasion and metastasis 1, FN1 - fibronectin 1, DOCK4 - dedicator of cytokinesis 4, SLC8A1 - solute carrier family 8 (sodium/calcium exchanger), member 1, LRRC16A - leucine rich repeat containing 16a, CD274 - cd274 molecule, IL12A - interleukin 12a (natural killer cell stimulatory factor 1, cytotoxic lymphocyte maturation factor 1, p35), PLK2 - polo-like kinase 2, RDX - r…
GO:0042127	regulation of cell proliferation	8.06e-07	0.000648	1.51	[IFITM1 - interferon induced transmembrane protein 1, FN1 - fibronectin 1, TRIM24 - tripartite motif containing 24, GDF9 - growth differentiation factor 9, CD274 - cd274 molecule, FAM98A - family with sequence similarity 98, member a, IL12A - interleukin 12a (natural killer cell stimulatory factor 1, cytotoxic lymphocyte maturation factor 1, p35), RELA - v-rel avian reticuloendotheliosis viral on…
GO:0060284	regulation of cell development	9.44e-07	0.000722	1.72	[TIAM1 - t-cell lymphoma invasion and metastasis 1, GFI1 - growth factor independent 1 transcription repressor, PDLIM5 - pdz and lim domain 5, FN1 - fibronectin 1, CAMSAP2 - calmodulin regulated spectrin-associated protein family, member 2, GRIP1 - glutamate receptor interacting protein 1, PDE5A - phosphodiesterase 5a, cgmp-specific, TMEM106B - transmembrane protein 106b, LRRC16A - leucine rich r…
GO:0007169	transmembrane receptor protein tyrosine kinase signaling pathway	1.13e-06	0.000825	1.99	[TIAM1 - t-cell lymphoma invasion and metastasis 1, NCKAP1 - nck-associated protein 1, TRAT1 - t cell receptor associated transmembrane adaptor 1, RHOQ - ras homolog family member q, CTGF - connective tissue growth factor, PIK3R3 - phosphoinositide-3-kinase, regulatory subunit 3 (gamma), GAB2 - grb2-associated binding protein 2, ABL2 - c-abl oncogene 2, non-receptor tyrosine kinase, PXN - paxilli…
GO:0048513	animal organ development	1.4e-06	0.000976	1.57	[GFI1 - growth factor independent 1 transcription repressor, LPHN2 - latrophilin 2, ITGA8 - integrin, alpha 8, WDR19 - wd repeat domain 19, RELA - v-rel avian reticuloendotheliosis viral oncogene homolog a, SIX4 - six homeobox 4, EPAS1 - endothelial pas domain protein 1, SEPP1 - selenoprotein p, plasma, 1, SPARC - secreted protein, acidic, cysteine-rich (osteonectin), MKKS - mckusick-kaufman synd…
GO:0040017	positive regulation of locomotion	1.46e-06	0.000971	1.97	[TIAM1 - t-cell lymphoma invasion and metastasis 1, CHMP4C - charged multivesicular body protein 4c, FN1 - fibronectin 1, DOCK4 - dedicator of cytokinesis 4, SLC8A1 - solute carrier family 8 (sodium/calcium exchanger), member 1, LRRC16A - leucine rich repeat containing 16a, CD274 - cd274 molecule, IL12A - interleukin 12a (natural killer cell stimulatory factor 1, cytotoxic lymphocyte maturation f…
GO:1901700	response to oxygen-containing compound	1.69e-06	0.00107	1.56	[GFI1 - growth factor independent 1 transcription repressor, AKAP9 - a kinase (prka) anchor protein (yotiao) 9, CD274 - cd274 molecule, IL12A - interleukin 12a (natural killer cell stimulatory factor 1, cytotoxic lymphocyte maturation factor 1, p35), XRN1 - 5'-3' exoribonuclease 1, RELA - v-rel avian reticuloendotheliosis viral oncogene homolog a, ABL2 - c-abl oncogene 2, non-receptor tyrosine ki…
GO:0023051	regulation of signaling	1.71e-06	0.00105	1.31	[GFI1 - growth factor independent 1 transcription repressor, FAM13A - family with sequence similarity 13, member a, TRIM24 - tripartite motif containing 24, DHX33 - deah (asp-glu-ala-his) box polypeptide 33, GDF9 - growth differentiation factor 9, THEM4 - thioesterase superfamily member 4, RELA - v-rel avian reticuloendotheliosis viral oncogene homolog a, BST2 - bone marrow stromal cell antigen 2…
GO:0030501	positive regulation of bone mineralization	1.98e-06	0.00117	5.6	[P2RX7 - purinergic receptor p2x, ligand-gated ion channel, 7, ANO6 - anoctamin 6, ACVR2A - activin a receptor, type iia, ACVR2B - activin a receptor, type iib, BMPR2 - bone morphogenetic protein receptor, type ii (serine/threonine kinase), ATRAID - all-trans retinoic acid-induced differentiation factor, ADRB2 - adrenoceptor beta 2, surface, SLC8A1 - solute carrier family 8 (sodium/calcium exchan…
GO:2000147	positive regulation of cell motility	2.23e-06	0.00126	1.99	[TIAM1 - t-cell lymphoma invasion and metastasis 1, FN1 - fibronectin 1, DOCK4 - dedicator of cytokinesis 4, SLC8A1 - solute carrier family 8 (sodium/calcium exchanger), member 1, LRRC16A - leucine rich repeat containing 16a, CD274 - cd274 molecule, IL12A - interleukin 12a (natural killer cell stimulatory factor 1, cytotoxic lymphocyte maturation factor 1, p35), PLK2 - polo-like kinase 2, RDX - r…
GO:0051960	regulation of nervous system development	3.11e-06	0.0017	1.69	[TIAM1 - t-cell lymphoma invasion and metastasis 1, GFI1 - growth factor independent 1 transcription repressor, PDLIM5 - pdz and lim domain 5, FN1 - fibronectin 1, PRKACA - protein kinase, camp-dependent, catalytic, alpha, CAMSAP2 - calmodulin regulated spectrin-associated protein family, member 2, GRIP1 - glutamate receptor interacting protein 1, TMEM106B - transmembrane protein 106b, SYT1 - syn…
GO:0007178	transmembrane receptor protein serine/threonine kinase signaling pathway	4.95e-06	0.00261	2.72	[ACVR1C - activin a receptor, type ic, DDX5 - dead (asp-glu-ala-asp) box helicase 5, HIPK2 - homeodomain interacting protein kinase 2, ACVR2A - activin a receptor, type iia, F11R - f11 receptor, ACVR2B - activin a receptor, type iib, GDF9 - growth differentiation factor 9, ROR2 - receptor tyrosine kinase-like orphan receptor 2, ACVR1 - activin a receptor, type i, FSTL1 - follistatin-like 1, PXN -…
GO:0051272	positive regulation of cellular component movement	5e-06	0.00255	1.93	[TIAM1 - t-cell lymphoma invasion and metastasis 1, FN1 - fibronectin 1, DOCK4 - dedicator of cytokinesis 4, SLC8A1 - solute carrier family 8 (sodium/calcium exchanger), member 1, LRRC16A - leucine rich repeat containing 16a, CD274 - cd274 molecule, IL12A - interleukin 12a (natural killer cell stimulatory factor 1, cytotoxic lymphocyte maturation factor 1, p35), PLK2 - polo-like kinase 2, RDX - r…
GO:0009719	response to endogenous stimulus	5.08e-06	0.00251	1.61	[PRKACA - protein kinase, camp-dependent, catalytic, alpha, AKAP9 - a kinase (prka) anchor protein (yotiao) 9, CAPN2 - calpain 2, (m/ii) large subunit, SLC8A1 - solute carrier family 8 (sodium/calcium exchanger), member 1, ADRB2 - adrenoceptor beta 2, surface, RHOQ - ras homolog family member q, CTGF - connective tissue growth factor, RELA - v-rel avian reticuloendotheliosis viral oncogene homolo…
GO:0070887	cellular response to chemical stimulus	5.16e-06	0.00246	1.47	[GFI1 - growth factor independent 1 transcription repressor, AKAP9 - a kinase (prka) anchor protein (yotiao) 9, TRIM24 - tripartite motif containing 24, CD274 - cd274 molecule, IL12A - interleukin 12a (natural killer cell stimulatory factor 1, cytotoxic lymphocyte maturation factor 1, p35), XRN1 - 5'-3' exoribonuclease 1, RELA - v-rel avian reticuloendotheliosis viral oncogene homolog a, TMEM173 …
GO:0009966	regulation of signal transduction	5.43e-06	0.00252	1.31	[GFI1 - growth factor independent 1 transcription repressor, FAM13A - family with sequence similarity 13, member a, TRIM24 - tripartite motif containing 24, DHX33 - deah (asp-glu-ala-his) box polypeptide 33, THEM4 - thioesterase superfamily member 4, GDF9 - growth differentiation factor 9, RELA - v-rel avian reticuloendotheliosis viral oncogene homolog a, BST2 - bone marrow stromal cell antigen 2…
GO:0050767	regulation of neurogenesis	5.63e-06	0.00253	1.71	[TIAM1 - t-cell lymphoma invasion and metastasis 1, GFI1 - growth factor independent 1 transcription repressor, PDLIM5 - pdz and lim domain 5, FN1 - fibronectin 1, CAMSAP2 - calmodulin regulated spectrin-associated protein family, member 2, GRIP1 - glutamate receptor interacting protein 1, TMEM106B - transmembrane protein 106b, SYT1 - synaptotagmin i, GOLGA4 - golgin a4, RELA - v-rel avian reticu…
GO:1902531	regulation of intracellular signal transduction	6.33e-06	0.00277	1.43	[DEPTOR - dep domain containing mtor-interacting protein, FAM13A - family with sequence similarity 13, member a, DDX5 - dead (asp-glu-ala-asp) box helicase 5, FN1 - fibronectin 1, TRIM24 - tripartite motif containing 24, PJA2 - praja ring finger 2, e3 ubiquitin protein ligase, DHX33 - deah (asp-glu-ala-his) box polypeptide 33, LURAP1L - leucine rich adaptor protein 1-like, THEM4 - thioesterase su…
GO:1901701	cellular response to oxygen-containing compound	7.52e-06	0.00319	1.69	[GFI1 - growth factor independent 1 transcription repressor, PRKACA - protein kinase, camp-dependent, catalytic, alpha, AKAP9 - a kinase (prka) anchor protein (yotiao) 9, CAPN2 - calpain 2, (m/ii) large subunit, SLC8A1 - solute carrier family 8 (sodium/calcium exchanger), member 1, ADRB2 - adrenoceptor beta 2, surface, RHOQ - ras homolog family member q, CD274 - cd274 molecule, IL12A - interleuki…
GO:0006979	response to oxidative stress	8.44e-06	0.00349	2.09	[GLRX2 - glutaredoxin 2, OXR1 - oxidation resistance 1, PKD2 - polycystic kidney disease 2 (autosomal dominant), PNPT1 - polyribonucleotide nucleotidyltransferase 1, TPM1 - tropomyosin 1 (alpha), STAT1 - signal transducer and activator of transcription 1, 91kda, SLC8A1 - solute carrier family 8 (sodium/calcium exchanger), member 1, MDM2 - mdm2 oncogene, e3 ubiquitin protein ligase, RELA - v-rel a…
GO:2000027	regulation of organ morphogenesis	8.96e-06	0.00361	2.47	[TIAM1 - t-cell lymphoma invasion and metastasis 1, STAT1 - signal transducer and activator of transcription 1, 91kda, ROR2 - receptor tyrosine kinase-like orphan receptor 2, FBXW7 - f-box and wd repeat domain containing 7, e3 ubiquitin protein ligase, AJAP1 - adherens junctions associated protein 1, ACVR1 - activin a receptor, type i, ANKRD6 - ankyrin repeat domain 6, SIX4 - six homeobox 4, FZD7…
GO:0048585	negative regulation of response to stimulus	9.61e-06	0.00377	1.47	[DEPTOR - dep domain containing mtor-interacting protein, THEM4 - thioesterase superfamily member 4, RELA - v-rel avian reticuloendotheliosis viral oncogene homolog a, BST2 - bone marrow stromal cell antigen 2, DKK1 - dickkopf wnt signaling pathway inhibitor 1, MLLT3 - myeloid/lymphoid or mixed-lineage leukemia (trithorax homolog, drosophila); translocated to, 3, NDFIP1 - nedd4 family interacting…
GO:0070169	positive regulation of biomineral tissue development	1.1e-05	0.00421	4.78	[P2RX7 - purinergic receptor p2x, ligand-gated ion channel, 7, ANO6 - anoctamin 6, ACVR2A - activin a receptor, type iia, ACVR2B - activin a receptor, type iib, BMPR2 - bone morphogenetic protein receptor, type ii (serine/threonine kinase), ATRAID - all-trans retinoic acid-induced differentiation factor, ADRB2 - adrenoceptor beta 2, surface, SLC8A1 - solute carrier family 8 (sodium/calcium exchan…
GO:0055114	oxidation-reduction process	1.24e-05	0.00464	1.63	[CROT - carnitine o-octanoyltransferase, LOXL4 - lysyl oxidase-like 4, NDUFA3 - nadh dehydrogenase (ubiquinone) 1 alpha subcomplex, 3, 9kda, TSTD1 - thiosulfate sulfurtransferase (rhodanese)-like domain containing 1, AASS - aminoadipate-semialdehyde synthase, CP - ceruloplasmin (ferroxidase), ENO3 - enolase 3 (beta, muscle), CHCHD4 - coiled-coil-helix-coiled-coil-helix domain containing 4, DNAJC2…
GO:0007179	transforming growth factor beta receptor signaling pathway	1.25e-05	0.00454	3.29	[ACVR1C - activin a receptor, type ic, TWSG1 - twisted gastrulation homolog 1 (drosophila), TGFB2 - transforming growth factor, beta 2, SMAD1 - smad family member 1, HIPK2 - homeodomain interacting protein kinase 2, F11R - f11 receptor, ACVR2A - activin a receptor, type iia, GDF9 - growth differentiation factor 9, ACVR2B - activin a receptor, type iib, ACVR1 - activin a receptor, type i, DUSP22 -…
GO:0010243	response to organonitrogen compound	1.26e-05	0.00449	1.68	[TIAM1 - t-cell lymphoma invasion and metastasis 1, SEL1L - sel-1 suppressor of lin-12-like (c. elegans), NNMT - nicotinamide n-methyltransferase, PRKACA - protein kinase, camp-dependent, catalytic, alpha, AKAP9 - a kinase (prka) anchor protein (yotiao) 9, CAPN2 - calpain 2, (m/ii) large subunit, ADRB2 - adrenoceptor beta 2, surface, SLC8A1 - solute carrier family 8 (sodium/calcium exchanger), me…
GO:0051962	positive regulation of nervous system development	1.35e-05	0.00468	1.87	[TIAM1 - t-cell lymphoma invasion and metastasis 1, FN1 - fibronectin 1, TMEM106B - transmembrane protein 106b, GRIP1 - glutamate receptor interacting protein 1, SYT1 - synaptotagmin i, GOLGA4 - golgin a4, RELA - v-rel avian reticuloendotheliosis viral oncogene homolog a, SPINT1 - serine peptidase inhibitor, kunitz type 1, ABL2 - c-abl oncogene 2, non-receptor tyrosine kinase, DKK1 - dickkopf wnt…
GO:0050769	positive regulation of neurogenesis	1.74e-05	0.0059	1.92	[TIAM1 - t-cell lymphoma invasion and metastasis 1, ZNF804A - zinc finger protein 804a, FN1 - fibronectin 1, SEMA3A - sema domain, immunoglobulin domain (ig), short basic domain, secreted, (semaphorin) 3a, TMEM106B - transmembrane protein 106b, GRIP1 - glutamate receptor interacting protein 1, SYT1 - synaptotagmin i, RIMS1 - regulating synaptic membrane exocytosis 1, ITGA3 - integrin, alpha 3 (an…
GO:0010720	positive regulation of cell development	1.99e-05	0.0066	1.84	[TIAM1 - t-cell lymphoma invasion and metastasis 1, FN1 - fibronectin 1, PDE5A - phosphodiesterase 5a, cgmp-specific, TMEM106B - transmembrane protein 106b, GRIP1 - glutamate receptor interacting protein 1, LRRC16A - leucine rich repeat containing 16a, SYT1 - synaptotagmin i, GOLGA4 - golgin a4, RELA - v-rel avian reticuloendotheliosis viral oncogene homolog a, SPINT1 - serine peptidase inhibitor…
GO:0031401	positive regulation of protein modification process	2.08e-05	0.00678	1.52	[AKAP9 - a kinase (prka) anchor protein (yotiao) 9, DHX33 - deah (asp-glu-ala-his) box polypeptide 33, GDF9 - growth differentiation factor 9, GADD45A - growth arrest and dna-damage-inducible, alpha, IL12A - interleukin 12a (natural killer cell stimulatory factor 1, cytotoxic lymphocyte maturation factor 1, p35), DKK1 - dickkopf wnt signaling pathway inhibitor 1, NDFIP1 - nedd4 family interacting…
GO:0010033	response to organic substance	2.15e-05	0.00684	1.37	[IFITM1 - interferon induced transmembrane protein 1, SEL1L - sel-1 suppressor of lin-12-like (c. elegans), GFI1 - growth factor independent 1 transcription repressor, AKAP9 - a kinase (prka) anchor protein (yotiao) 9, CD274 - cd274 molecule, IL12A - interleukin 12a (natural killer cell stimulatory factor 1, cytotoxic lymphocyte maturation factor 1, p35), XRN1 - 5'-3' exoribonuclease 1, RELA - v-…
GO:0045932	negative regulation of muscle contraction	2.21e-05	0.00689	6.2	[ARHGAP42 - rho gtpase activating protein 42, SRI - sorcin, DOCK4 - dedicator of cytokinesis 4, PDE5A - phosphodiesterase 5a, cgmp-specific, CALCRL - calcitonin receptor-like, PTGS2 - prostaglandin-endoperoxide synthase 2 (prostaglandin g/h synthase and cyclooxygenase), PRKG1 - protein kinase, cgmp-dependent, type i, ADRB2 - adrenoceptor beta 2, surface]
GO:0032879	regulation of localization	2.69e-05	0.00823	1.32	[IFITM1 - interferon induced transmembrane protein 1, CTNNA3 - catenin (cadherin-associated protein), alpha 3, FN1 - fibronectin 1, AKAP9 - a kinase (prka) anchor protein (yotiao) 9, GDF9 - growth differentiation factor 9, TRAT1 - t cell receptor associated transmembrane adaptor 1, LRRC16A - leucine rich repeat containing 16a, SLC31A2 - solute carrier family 31 (copper transporter), member 2, CD2…
GO:0001932	regulation of protein phosphorylation	2.82e-05	0.00845	1.46	[DEPTOR - dep domain containing mtor-interacting protein, FN1 - fibronectin 1, AKAP9 - a kinase (prka) anchor protein (yotiao) 9, DHX33 - deah (asp-glu-ala-his) box polypeptide 33, GDF9 - growth differentiation factor 9, GADD45A - growth arrest and dna-damage-inducible, alpha, IL12A - interleukin 12a (natural killer cell stimulatory factor 1, cytotoxic lymphocyte maturation factor 1, p35), CORO1C…
GO:1901698	response to nitrogen compound	2.86e-05	0.00841	1.62	[TIAM1 - t-cell lymphoma invasion and metastasis 1, SEL1L - sel-1 suppressor of lin-12-like (c. elegans), NNMT - nicotinamide n-methyltransferase, PRKACA - protein kinase, camp-dependent, catalytic, alpha, AKAP9 - a kinase (prka) anchor protein (yotiao) 9, CAPN2 - calpain 2, (m/ii) large subunit, ADRB2 - adrenoceptor beta 2, surface, SLC8A1 - solute carrier family 8 (sodium/calcium exchanger), me…
GO:0051240	positive regulation of multicellular organismal process	2.89e-05	0.00835	1.43	[IFITM1 - interferon induced transmembrane protein 1, FN1 - fibronectin 1, DHX33 - deah (asp-glu-ala-his) box polypeptide 33, CD274 - cd274 molecule, IL12A - interleukin 12a (natural killer cell stimulatory factor 1, cytotoxic lymphocyte maturation factor 1, p35), RELA - v-rel avian reticuloendotheliosis viral oncogene homolog a, TMEM173 - transmembrane protein 173, SPINT1 - serine peptidase inhi…
GO:0045597	positive regulation of cell differentiation	2.98e-05	0.00844	1.58	[TIAM1 - t-cell lymphoma invasion and metastasis 1, IFITM1 - interferon induced transmembrane protein 1, PTCH2 - patched 2, FN1 - fibronectin 1, GRIP1 - glutamate receptor interacting protein 1, PDE5A - phosphodiesterase 5a, cgmp-specific, TMEM106B - transmembrane protein 106b, LRRC16A - leucine rich repeat containing 16a, SYT1 - synaptotagmin i, GOLGA4 - golgin a4, IL12A - interleukin 12a (natur…
GO:0009725	response to hormone	3.06e-05	0.00851	1.7	[PRKACA - protein kinase, camp-dependent, catalytic, alpha, RHOQ - ras homolog family member q, CTGF - connective tissue growth factor, RELA - v-rel avian reticuloendotheliosis viral oncogene homolog a, XRN1 - 5'-3' exoribonuclease 1, RDX - radixin, SPARC - secreted protein, acidic, cysteine-rich (osteonectin), ENDOG - endonuclease g, LEPR - leptin receptor, KRAS - kirsten rat sarcoma viral oncog…
GO:0008284	positive regulation of cell proliferation	3.28e-05	0.00895	1.59	[TIAM1 - t-cell lymphoma invasion and metastasis 1, PURA - purine-rich element binding protein a, FN1 - fibronectin 1, GDF9 - growth differentiation factor 9, FAM98A - family with sequence similarity 98, member a, CD274 - cd274 molecule, IL12A - interleukin 12a (natural killer cell stimulatory factor 1, cytotoxic lymphocyte maturation factor 1, p35), RELA - v-rel avian reticuloendotheliosis viral…
GO:1901652	response to peptide	3.42e-05	0.00917	2.01	[ACVR1C - activin a receptor, type ic, PNPT1 - polyribonucleotide nucleotidyltransferase 1, PRKACA - protein kinase, camp-dependent, catalytic, alpha, CRY1 - cryptochrome 1 (photolyase-like), STAT1 - signal transducer and activator of transcription 1, 91kda, ADRB2 - adrenoceptor beta 2, surface, LRP6 - low density lipoprotein receptor-related protein 6, RHOQ - ras homolog family member q, MDM2 - …
GO:1901699	cellular response to nitrogen compound	3.47e-05	0.00914	1.88	[PKD2 - polycystic kidney disease 2 (autosomal dominant), PRKACA - protein kinase, camp-dependent, catalytic, alpha, CAPN2 - calpain 2, (m/ii) large subunit, AKAP9 - a kinase (prka) anchor protein (yotiao) 9, STAT1 - signal transducer and activator of transcription 1, 91kda, ADRB2 - adrenoceptor beta 2, surface, SLC8A1 - solute carrier family 8 (sodium/calcium exchanger), member 1, RHOQ - ras hom…
GO:0048856	anatomical structure development	4.73e-05	0.0123	1.27	[EMP1 - epithelial membrane protein 1, GFI1 - growth factor independent 1 transcription repressor, CREG1 - cellular repressor of e1a-stimulated genes 1, GDF9 - growth differentiation factor 9, WDR19 - wd repeat domain 19, BTD - biotinidase, RELA - v-rel avian reticuloendotheliosis viral oncogene homolog a, BST2 - bone marrow stromal cell antigen 2, ENO3 - enolase 3 (beta, muscle), SPINT1 - serine…
GO:0071417	cellular response to organonitrogen compound	4.79e-05	0.0122	1.9	[PKD2 - polycystic kidney disease 2 (autosomal dominant), PRKACA - protein kinase, camp-dependent, catalytic, alpha, CAPN2 - calpain 2, (m/ii) large subunit, AKAP9 - a kinase (prka) anchor protein (yotiao) 9, STAT1 - signal transducer and activator of transcription 1, 91kda, ADRB2 - adrenoceptor beta 2, surface, SLC8A1 - solute carrier family 8 (sodium/calcium exchanger), member 1, RHOQ - ras hom…
GO:0007264	small GTPase mediated signal transduction	4.8e-05	0.012	2.04	[TIAM1 - t-cell lymphoma invasion and metastasis 1, RAB28 - rab28, member ras oncogene family, NCKAP1 - nck-associated protein 1, SHC1 - shc (src homology 2 domain containing) transforming protein 1, DOCK4 - dedicator of cytokinesis 4, RHOQ - ras homolog family member q, RAB10 - rab10, member ras oncogene family, FGF2 - fibroblast growth factor 2 (basic), PLK2 - polo-like kinase 2, ARHGAP5 - rho …
GO:0032268	regulation of cellular protein metabolic process	5.28e-05	0.013	1.31	[DEPTOR - dep domain containing mtor-interacting protein, GFI1 - growth factor independent 1 transcription repressor, FN1 - fibronectin 1, AKAP9 - a kinase (prka) anchor protein (yotiao) 9, DHX33 - deah (asp-glu-ala-his) box polypeptide 33, GDF9 - growth differentiation factor 9, GADD45A - growth arrest and dna-damage-inducible, alpha, IL12A - interleukin 12a (natural killer cell stimulatory fact…
GO:0023057	negative regulation of signaling	5.31e-05	0.0129	1.46	[DEPTOR - dep domain containing mtor-interacting protein, THEM4 - thioesterase superfamily member 4, TRAT1 - t cell receptor associated transmembrane adaptor 1, RELA - v-rel avian reticuloendotheliosis viral oncogene homolog a, DKK1 - dickkopf wnt signaling pathway inhibitor 1, MLLT3 - myeloid/lymphoid or mixed-lineage leukemia (trithorax homolog, drosophila); translocated to, 3, CHP1 - calcineur…
GO:0031399	regulation of protein modification process	6.04e-05	0.0144	1.38	[DEPTOR - dep domain containing mtor-interacting protein, GFI1 - growth factor independent 1 transcription repressor, FN1 - fibronectin 1, AKAP9 - a kinase (prka) anchor protein (yotiao) 9, DHX33 - deah (asp-glu-ala-his) box polypeptide 33, GDF9 - growth differentiation factor 9, GADD45A - growth arrest and dna-damage-inducible, alpha, IL12A - interleukin 12a (natural killer cell stimulatory fact…
GO:0043954	cellular component maintenance	6.06e-05	0.0143	4.86	[RASSF8 - ras association (ralgds/af-6) domain family (n-terminal) member 8, BAI3 - brain-specific angiogenesis inhibitor 3, INSR - insulin receptor, KIAA1715 - kiaa1715, PLEKHA7 - pleckstrin homology domain containing, family a member 7, F2R - coagulation factor ii (thrombin) receptor, PKP2 - plakophilin 2, TANC1 - tetratricopeptide repeat, ankyrin repeat and coiled-coil containing 1, ITGA3 - in…
GO:0045986	negative regulation of smooth muscle contraction	6.27e-05	0.0145	7.63	[ARHGAP42 - rho gtpase activating protein 42, DOCK4 - dedicator of cytokinesis 4, PTGS2 - prostaglandin-endoperoxide synthase 2 (prostaglandin g/h synthase and cyclooxygenase), CALCRL - calcitonin receptor-like, PRKG1 - protein kinase, cgmp-dependent, type i, ADRB2 - adrenoceptor beta 2, surface]
GO:0001934	positive regulation of protein phosphorylation	6.57e-05	0.015	1.54	[TIAM1 - t-cell lymphoma invasion and metastasis 1, PRKACA - protein kinase, camp-dependent, catalytic, alpha, AKAP9 - a kinase (prka) anchor protein (yotiao) 9, DHX33 - deah (asp-glu-ala-his) box polypeptide 33, PDE5A - phosphodiesterase 5a, cgmp-specific, GDF9 - growth differentiation factor 9, PFN2 - profilin 2, GADD45A - growth arrest and dna-damage-inducible, alpha, FBXW7 - f-box and wd repe…
GO:0010604	positive regulation of macromolecule metabolic process	7.26e-05	0.0163	1.26	[CREB5 - camp responsive element binding protein 5, GFI1 - growth factor independent 1 transcription repressor, AKAP9 - a kinase (prka) anchor protein (yotiao) 9, TRIM24 - tripartite motif containing 24, DHX33 - deah (asp-glu-ala-his) box polypeptide 33, GDF9 - growth differentiation factor 9, NFE2L3 - nuclear factor (erythroid-derived 2)-like 3, RELA - v-rel avian reticuloendotheliosis viral onc…
GO:0044057	regulation of system process	7.4e-05	0.0164	1.76	[CTNNA3 - catenin (cadherin-associated protein), alpha 3, PRKACA - protein kinase, camp-dependent, catalytic, alpha, AKAP9 - a kinase (prka) anchor protein (yotiao) 9, DOCK4 - dedicator of cytokinesis 4, PDE5A - phosphodiesterase 5a, cgmp-specific, GDF9 - growth differentiation factor 9, SLC8A1 - solute carrier family 8 (sodium/calcium exchanger), member 1, ADRB2 - adrenoceptor beta 2, surface, C…
GO:0010648	negative regulation of cell communication	7.69e-05	0.0168	1.45	[DEPTOR - dep domain containing mtor-interacting protein, THEM4 - thioesterase superfamily member 4, RELA - v-rel avian reticuloendotheliosis viral oncogene homolog a, DKK1 - dickkopf wnt signaling pathway inhibitor 1, MLLT3 - myeloid/lymphoid or mixed-lineage leukemia (trithorax homolog, drosophila); translocated to, 3, CHP1 - calcineurin-like ef-hand protein 1, BMP8A - bone morphogenetic protei…
GO:0032270	positive regulation of cellular protein metabolic process	8.11e-05	0.0175	1.41	[FN1 - fibronectin 1, AKAP9 - a kinase (prka) anchor protein (yotiao) 9, DHX33 - deah (asp-glu-ala-his) box polypeptide 33, GDF9 - growth differentiation factor 9, GADD45A - growth arrest and dna-damage-inducible, alpha, IL12A - interleukin 12a (natural killer cell stimulatory factor 1, cytotoxic lymphocyte maturation factor 1, p35), DKK1 - dickkopf wnt signaling pathway inhibitor 1, RDX - radixi…
GO:0010632	regulation of epithelial cell migration	8.61e-05	0.0183	2.26	[SEMA3A - sema domain, immunoglobulin domain (ig), short basic domain, secreted, (semaphorin) 3a, PFN2 - profilin 2, ITGA3 - integrin, alpha 3 (antigen cd49c, alpha 3 subunit of vla-3 receptor), CORO1C - coronin, actin binding protein, 1c, FGF2 - fibroblast growth factor 2 (basic), NFE2L2 - nuclear factor (erythroid-derived 2)-like 2, PLK2 - polo-like kinase 2, SPARC - secreted protein, acidic, c…
GO:0043434	response to peptide hormone	8.78e-05	0.0184	2.06	[ACVR1C - activin a receptor, type ic, PNPT1 - polyribonucleotide nucleotidyltransferase 1, PRKACA - protein kinase, camp-dependent, catalytic, alpha, CRY1 - cryptochrome 1 (photolyase-like), STAT1 - signal transducer and activator of transcription 1, 91kda, LRP6 - low density lipoprotein receptor-related protein 6, RHOQ - ras homolog family member q, MDM2 - mdm2 oncogene, e3 ubiquitin protein li…
GO:0048522	positive regulation of cellular process	8.9e-05	0.0184	1.19	[CREB5 - camp responsive element binding protein 5, GFI1 - growth factor independent 1 transcription repressor, AKAP9 - a kinase (prka) anchor protein (yotiao) 9, TRIM24 - tripartite motif containing 24, DHX33 - deah (asp-glu-ala-his) box polypeptide 33, GDF9 - growth differentiation factor 9, NFE2L3 - nuclear factor (erythroid-derived 2)-like 3, LRRC16A - leucine rich repeat containing 16a, LIPT…
GO:0042325	regulation of phosphorylation	8.97e-05	0.0183	1.41	[DEPTOR - dep domain containing mtor-interacting protein, FN1 - fibronectin 1, AKAP9 - a kinase (prka) anchor protein (yotiao) 9, DHX33 - deah (asp-glu-ala-his) box polypeptide 33, GDF9 - growth differentiation factor 9, GADD45A - growth arrest and dna-damage-inducible, alpha, IL12A - interleukin 12a (natural killer cell stimulatory factor 1, cytotoxic lymphocyte maturation factor 1, p35), CORO1C…
GO:0051247	positive regulation of protein metabolic process	9.16e-05	0.0184	1.39	[FN1 - fibronectin 1, AKAP9 - a kinase (prka) anchor protein (yotiao) 9, DHX33 - deah (asp-glu-ala-his) box polypeptide 33, GDF9 - growth differentiation factor 9, GADD45A - growth arrest and dna-damage-inducible, alpha, IL12A - interleukin 12a (natural killer cell stimulatory factor 1, cytotoxic lymphocyte maturation factor 1, p35), RELA - v-rel avian reticuloendotheliosis viral oncogene homolog…
GO:0009968	negative regulation of signal transduction	9.63e-05	0.0191	1.47	[PTCH2 - patched 2, DEPTOR - dep domain containing mtor-interacting protein, PRKACA - protein kinase, camp-dependent, catalytic, alpha, RCAN1 - regulator of calcineurin 1, THEM4 - thioesterase superfamily member 4, ADRB2 - adrenoceptor beta 2, surface, FBXW7 - f-box and wd repeat domain containing 7, e3 ubiquitin protein ligase, TLE1 - transducin-like enhancer of split 1 (e(sp1) homolog, drosophi…
GO:2000050	regulation of non-canonical Wnt signaling pathway	9.99e-05	0.0196	5.94	[TIAM1 - t-cell lymphoma invasion and metastasis 1, ANKRD6 - ankyrin repeat domain 6, NPHP3 - nephronophthisis 3 (adolescent), DKK1 - dickkopf wnt signaling pathway inhibitor 1, DAAM2 - dishevelled associated activator of morphogenesis 2, MLLT3 - myeloid/lymphoid or mixed-lineage leukemia (trithorax homolog, drosophila); translocated to, 3, WNT5A - wingless-type mmtv integration site family, memb…
GO:0090257	regulation of muscle system process	0.000101	0.0196	2.24	[ARHGAP42 - rho gtpase activating protein 42, CTNNA3 - catenin (cadherin-associated protein), alpha 3, PRKACA - protein kinase, camp-dependent, catalytic, alpha, TPM1 - tropomyosin 1 (alpha), DOCK4 - dedicator of cytokinesis 4, PDE5A - phosphodiesterase 5a, cgmp-specific, ADRB2 - adrenoceptor beta 2, surface, SLC8A1 - solute carrier family 8 (sodium/calcium exchanger), member 1, CTGF - connective…
GO:0009893	positive regulation of metabolic process	0.000103	0.0197	1.25	[CREB5 - camp responsive element binding protein 5, GFI1 - growth factor independent 1 transcription repressor, AKAP9 - a kinase (prka) anchor protein (yotiao) 9, TRIM24 - tripartite motif containing 24, DHX33 - deah (asp-glu-ala-his) box polypeptide 33, GDF9 - growth differentiation factor 9, NFE2L3 - nuclear factor (erythroid-derived 2)-like 3, LIPT2 - lipoyl(octanoyl) transferase 2 (putative),…
GO:1990253	cellular response to leucine starvation	0.00011	0.0207	8.91	[SESN1 - sestrin 1, IMPACT - impact rwd domain protein, SESN2 - sestrin 2, EIF2AK4 - eukaryotic translation initiation factor 2 alpha kinase 4, RRAGD - ras-related gtp binding d]
GO:0042327	positive regulation of phosphorylation	0.000114	0.0213	1.5	[TIAM1 - t-cell lymphoma invasion and metastasis 1, PRKACA - protein kinase, camp-dependent, catalytic, alpha, AKAP9 - a kinase (prka) anchor protein (yotiao) 9, DHX33 - deah (asp-glu-ala-his) box polypeptide 33, PDE5A - phosphodiesterase 5a, cgmp-specific, GDF9 - growth differentiation factor 9, PFN2 - profilin 2, GADD45A - growth arrest and dna-damage-inducible, alpha, FBXW7 - f-box and wd repe…
GO:1905330	regulation of morphogenesis of an epithelium	0.000117	0.0216	2.6	[TIAM1 - t-cell lymphoma invasion and metastasis 1, NPHP3 - nephronophthisis 3 (adolescent), ETV5 - ets variant 5, PRICKLE2 - prickle homolog 2 (drosophila), STAT1 - signal transducer and activator of transcription 1, 91kda, ROR2 - receptor tyrosine kinase-like orphan receptor 2, WNT5A - wingless-type mmtv integration site family, member 5a, AJAP1 - adherens junctions associated protein 1, HGF - …
GO:0022603	regulation of anatomical structure morphogenesis	0.000123	0.0224	1.51	[TIAM1 - t-cell lymphoma invasion and metastasis 1, PDLIM5 - pdz and lim domain 5, FN1 - fibronectin 1, GRIP1 - glutamate receptor interacting protein 1, LRRC16A - leucine rich repeat containing 16a, FBXW7 - f-box and wd repeat domain containing 7, e3 ubiquitin protein ligase, SYT1 - synaptotagmin i, RHOQ - ras homolog family member q, GOLGA4 - golgin a4, CORO1C - coronin, actin binding protein, …
GO:0060393	regulation of pathway-restricted SMAD protein phosphorylation	0.000124	0.0224	3.5	[BMP8A - bone morphogenetic protein 8a, TWSG1 - twisted gastrulation homolog 1 (drosophila), TGFB2 - transforming growth factor, beta 2, PMEPA1 - prostate transmembrane protein, androgen induced 1, DKK1 - dickkopf wnt signaling pathway inhibitor 1, ACVR2A - activin a receptor, type iia, BMP8B - bone morphogenetic protein 8b, GDF9 - growth differentiation factor 9, BMPR2 - bone morphogenetic prote…
GO:0048583	regulation of response to stimulus	0.000125	0.0222	1.22	[GFI1 - growth factor independent 1 transcription repressor, FAM13A - family with sequence similarity 13, member a, TRIM24 - tripartite motif containing 24, DHX33 - deah (asp-glu-ala-his) box polypeptide 33, GDF9 - growth differentiation factor 9, THEM4 - thioesterase superfamily member 4, CD274 - cd274 molecule, RELA - v-rel avian reticuloendotheliosis viral oncogene homolog a, BST2 - bone marro…
GO:0051716	cellular response to stimulus	0.000135	0.0238	1.28	[SEL1L - sel-1 suppressor of lin-12-like (c. elegans), GFI1 - growth factor independent 1 transcription repressor, AKAP9 - a kinase (prka) anchor protein (yotiao) 9, TRIM24 - tripartite motif containing 24, GADD45A - growth arrest and dna-damage-inducible, alpha, TLK1 - tousled-like kinase 1, CD274 - cd274 molecule, IL12A - interleukin 12a (natural killer cell stimulatory factor 1, cytotoxic lymp…
GO:0034599	cellular response to oxidative stress	0.000143	0.0246	2.27	[OXR1 - oxidation resistance 1, GLRX2 - glutaredoxin 2, PKD2 - polycystic kidney disease 2 (autosomal dominant), ETV5 - ets variant 5, PNPT1 - polyribonucleotide nucleotidyltransferase 1, TPM1 - tropomyosin 1 (alpha), RBM11 - rna binding motif protein 11, EIF2S1 - eukaryotic translation initiation factor 2, subunit 1 alpha, 35kda, CPEB2 - cytoplasmic polyadenylation element binding protein 2, MDM…
GO:0048523	negative regulation of cellular process	0.000143	0.0249	1.2	[GFI1 - growth factor independent 1 transcription repressor, CHMP4C - charged multivesicular body protein 4c, TRIM24 - tripartite motif containing 24, CREG1 - cellular repressor of e1a-stimulated genes 1, THEM4 - thioesterase superfamily member 4, GDF9 - growth differentiation factor 9, NFE2L3 - nuclear factor (erythroid-derived 2)-like 3, LRRC16A - leucine rich repeat containing 16a, CD274 - cd2…
GO:0010562	positive regulation of phosphorus metabolic process	0.000154	0.0262	1.47	[TIAM1 - t-cell lymphoma invasion and metastasis 1, PRKACA - protein kinase, camp-dependent, catalytic, alpha, AKAP9 - a kinase (prka) anchor protein (yotiao) 9, DHX33 - deah (asp-glu-ala-his) box polypeptide 33, PDE5A - phosphodiesterase 5a, cgmp-specific, GDF9 - growth differentiation factor 9, PFN2 - profilin 2, GADD45A - growth arrest and dna-damage-inducible, alpha, FBXW7 - f-box and wd repe…
GO:0045937	positive regulation of phosphate metabolic process	0.000154	0.0259	1.47	[TIAM1 - t-cell lymphoma invasion and metastasis 1, PRKACA - protein kinase, camp-dependent, catalytic, alpha, AKAP9 - a kinase (prka) anchor protein (yotiao) 9, DHX33 - deah (asp-glu-ala-his) box polypeptide 33, PDE5A - phosphodiesterase 5a, cgmp-specific, GDF9 - growth differentiation factor 9, PFN2 - profilin 2, GADD45A - growth arrest and dna-damage-inducible, alpha, FBXW7 - f-box and wd repe…
GO:0051128	regulation of cellular component organization	0.000168	0.0279	1.3	[GFI1 - growth factor independent 1 transcription repressor, PDLIM5 - pdz and lim domain 5, CHMP4C - charged multivesicular body protein 4c, FN1 - fibronectin 1, AKAP9 - a kinase (prka) anchor protein (yotiao) 9, CAMSAP2 - calmodulin regulated spectrin-associated protein family, member 2, DHX33 - deah (asp-glu-ala-his) box polypeptide 33, F11R - f11 receptor, GDF9 - growth differentiation factor …
GO:0048145	regulation of fibroblast proliferation	0.000174	0.0286	3.04	[FN1 - fibronectin 1, IGF1 - insulin-like growth factor 1 (somatomedin c), DDR2 - discoidin domain receptor tyrosine kinase 2, S100A6 - s100 calcium binding protein a6, CDKN1A - cyclin-dependent kinase inhibitor 1a (p21, cip1), WNT5A - wingless-type mmtv integration site family, member 5a, TRIM32 - tripartite motif containing 32, CDC73 - cell division cycle 73, BMI1 - bmi1 polycomb ring finger on…
GO:0018125	peptidyl-cysteine methylation	0.000176	0.0287	17.81	[RAB6A - rab6a, member ras oncogene family, RAB3D - rab3d, member ras oncogene family, RAB3B - rab3b, member ras oncogene family]
GO:0071495	cellular response to endogenous stimulus	0.000191	0.0308	1.6	[PRKACA - protein kinase, camp-dependent, catalytic, alpha, AKAP9 - a kinase (prka) anchor protein (yotiao) 9, CAPN2 - calpain 2, (m/ii) large subunit, SLC8A1 - solute carrier family 8 (sodium/calcium exchanger), member 1, ADRB2 - adrenoceptor beta 2, surface, RHOQ - ras homolog family member q, RELA - v-rel avian reticuloendotheliosis viral oncogene homolog a, XRN1 - 5'-3' exoribonuclease 1, SPI…
GO:0070757	interleukin-35-mediated signaling pathway	0.000192	0.0306	8.1	[JAK2 - janus kinase 2, STAT1 - signal transducer and activator of transcription 1, 91kda, STAT4 - signal transducer and activator of transcription 4, IL6ST - interleukin 6 signal transducer (gp130, oncostatin m receptor), IL12A - interleukin 12a (natural killer cell stimulatory factor 1, cytotoxic lymphocyte maturation factor 1, p35)]
GO:0045664	regulation of neuron differentiation	0.000193	0.0304	1.64	[TIAM1 - t-cell lymphoma invasion and metastasis 1, GFI1 - growth factor independent 1 transcription repressor, PDLIM5 - pdz and lim domain 5, FN1 - fibronectin 1, CAMSAP2 - calmodulin regulated spectrin-associated protein family, member 2, GRIP1 - glutamate receptor interacting protein 1, TMEM106B - transmembrane protein 106b, SYT1 - synaptotagmin i, GOLGA4 - golgin a4, PLK2 - polo-like kinase 2…
GO:0002028	regulation of sodium ion transport	0.000198	0.0309	3	[SLMAP - sarcolemma associated protein, STOM - stomatin, FXYD5 - fxyd domain containing ion transport regulator 5, P2RX7 - purinergic receptor p2x, ligand-gated ion channel, 7, SLC8A1 - solute carrier family 8 (sodium/calcium exchanger), member 1, ADRB2 - adrenoceptor beta 2, surface, GLRX - glutaredoxin (thioltransferase), UTRN - utrophin, PER1 - period circadian clock 1, GPD1L - glycerol-3-phos…
GO:0007155	cell adhesion	0.0002	0.0309	1.53	[TIAM1 - t-cell lymphoma invasion and metastasis 1, DST - dystonin, PDLIM5 - pdz and lim domain 5, CTNNA3 - catenin (cadherin-associated protein), alpha 3, FN1 - fibronectin 1, ITGA8 - integrin, alpha 8, LRRN2 - leucine rich repeat neuronal 2, F11R - f11 receptor, PVRL3 - poliovirus receptor-related 3, CDHR3 - cadherin-related family member 3, PKP4 - plakophilin 4, CTGF - connective tissue growth…
GO:0034330	cell junction organization	0.000218	0.0333	2.17	[CADM1 - cell adhesion molecule 1, DST - dystonin, FN1 - fibronectin 1, F11R - f11 receptor, PLEKHA7 - pleckstrin homology domain containing, family a member 7, PVRL3 - poliovirus receptor-related 3, CDHR3 - cadherin-related family member 3, PKP4 - plakophilin 4, PERP - perp, tp53 apoptosis effector, PKP2 - plakophilin 2, OCLN - occludin, MTDH - metadherin, RASSF8 - ras association (ralgds/af-6) …
GO:0033158	regulation of protein import into nucleus, translocation	0.000223	0.0338	6.29	[TMEM173 - transmembrane protein 173, JAK2 - janus kinase 2, IGF1 - insulin-like growth factor 1 (somatomedin c), GAS6 - growth arrest-specific 6, CDKN1A - cyclin-dependent kinase inhibitor 1a (p21, cip1), TXN - thioredoxin]
GO:0019220	regulation of phosphate metabolic process	0.000231	0.0347	1.36	[DEPTOR - dep domain containing mtor-interacting protein, FN1 - fibronectin 1, AKAP9 - a kinase (prka) anchor protein (yotiao) 9, DHX33 - deah (asp-glu-ala-his) box polypeptide 33, GDF9 - growth differentiation factor 9, GADD45A - growth arrest and dna-damage-inducible, alpha, KIAA1244 - kiaa1244, CORO1C - coronin, actin binding protein, 1c, IL12A - interleukin 12a (natural killer cell stimulator…
GO:0051174	regulation of phosphorus metabolic process	0.000237	0.0352	1.36	[DEPTOR - dep domain containing mtor-interacting protein, FN1 - fibronectin 1, AKAP9 - a kinase (prka) anchor protein (yotiao) 9, DHX33 - deah (asp-glu-ala-his) box polypeptide 33, GDF9 - growth differentiation factor 9, GADD45A - growth arrest and dna-damage-inducible, alpha, KIAA1244 - kiaa1244, CORO1C - coronin, actin binding protein, 1c, IL12A - interleukin 12a (natural killer cell stimulator…
GO:0022610	biological adhesion	0.000247	0.0363	1.52	[TIAM1 - t-cell lymphoma invasion and metastasis 1, DST - dystonin, PDLIM5 - pdz and lim domain 5, CTNNA3 - catenin (cadherin-associated protein), alpha 3, FN1 - fibronectin 1, ITGA8 - integrin, alpha 8, LRRN2 - leucine rich repeat neuronal 2, F11R - f11 receptor, PVRL3 - poliovirus receptor-related 3, CDHR3 - cadherin-related family member 3, PKP4 - plakophilin 4, CTGF - connective tissue growth…
GO:0051241	negative regulation of multicellular organismal process	0.000254	0.037	1.45	[GFI1 - growth factor independent 1 transcription repressor, FN1 - fibronectin 1, PRKACA - protein kinase, camp-dependent, catalytic, alpha, DOCK4 - dedicator of cytokinesis 4, PDE5A - phosphodiesterase 5a, cgmp-specific, PFN2 - profilin 2, FBXW7 - f-box and wd repeat domain containing 7, e3 ubiquitin protein ligase, ADRB2 - adrenoceptor beta 2, surface, CD274 - cd274 molecule, IL12A - interleuki…
GO:0006937	regulation of muscle contraction	0.000256	0.0369	2.39	[ARHGAP42 - rho gtpase activating protein 42, CTNNA3 - catenin (cadherin-associated protein), alpha 3, PRKACA - protein kinase, camp-dependent, catalytic, alpha, TPM1 - tropomyosin 1 (alpha), DOCK4 - dedicator of cytokinesis 4, PDE5A - phosphodiesterase 5a, cgmp-specific, PRKG1 - protein kinase, cgmp-dependent, type i, PPP1R12B - protein phosphatase 1, regulatory subunit 12b, ADRB2 - adrenoceptor…
GO:0035456	response to interferon-beta	0.000256	0.0366	5.2	[IFITM1 - interferon induced transmembrane protein 1, UBE2G2 - ubiquitin-conjugating enzyme e2g 2, TMEM173 - transmembrane protein 173, BST2 - bone marrow stromal cell antigen 2, IRF1 - interferon regulatory factor 1, PNPT1 - polyribonucleotide nucleotidyltransferase 1, STAT1 - signal transducer and activator of transcription 1, 91kda]
GO:0010628	positive regulation of gene expression	0.000274	0.0387	1.33	[CREB5 - camp responsive element binding protein 5, GFI1 - growth factor independent 1 transcription repressor, DDX5 - dead (asp-glu-ala-asp) box helicase 5, FN1 - fibronectin 1, TRIM24 - tripartite motif containing 24, DHX33 - deah (asp-glu-ala-his) box polypeptide 33, ITGA8 - integrin, alpha 8, NFE2L3 - nuclear factor (erythroid-derived 2)-like 3, ARID3B - at rich interactive domain 3b (bright-…
GO:0010862	positive regulation of pathway-restricted SMAD protein phosphorylation	0.000276	0.0387	3.71	[BMP8A - bone morphogenetic protein 8a, TWSG1 - twisted gastrulation homolog 1 (drosophila), TGFB2 - transforming growth factor, beta 2, ACVR2A - activin a receptor, type iia, BMP8B - bone morphogenetic protein 8b, GDF9 - growth differentiation factor 9, BMPR2 - bone morphogenetic protein receptor, type ii (serine/threonine kinase), BMP4 - bone morphogenetic protein 4, ACVR1 - activin a receptor,…
GO:0030509	BMP signaling pathway	0.000291	0.0404	2.9	[BMP8A - bone morphogenetic protein 8a, TWSG1 - twisted gastrulation homolog 1 (drosophila), DDX5 - dead (asp-glu-ala-asp) box helicase 5, SMAD1 - smad family member 1, ACVR2A - activin a receptor, type iia, GDF9 - growth differentiation factor 9, ACVR2B - activin a receptor, type iib, ROR2 - receptor tyrosine kinase-like orphan receptor 2, ACVR1 - activin a receptor, type i, FSTL1 - follistatin-…
GO:0030500	regulation of bone mineralization	0.000314	0.0433	3.19	[P2RX7 - purinergic receptor p2x, ligand-gated ion channel, 7, ANO6 - anoctamin 6, ACVR2A - activin a receptor, type iia, ACVR2B - activin a receptor, type iib, DDR2 - discoidin domain receptor tyrosine kinase 2, BMPR2 - bone morphogenetic protein receptor, type ii (serine/threonine kinase), ATRAID - all-trans retinoic acid-induced differentiation factor, ADRB2 - adrenoceptor beta 2, surface, SLC…
GO:0043408	regulation of MAPK cascade	0.000322	0.044	1.56	[TIAM1 - t-cell lymphoma invasion and metastasis 1, FN1 - fibronectin 1, DHX33 - deah (asp-glu-ala-his) box polypeptide 33, PDE5A - phosphodiesterase 5a, cgmp-specific, GDF9 - growth differentiation factor 9, FBXW7 - f-box and wd repeat domain containing 7, e3 ubiquitin protein ligase, GADD45A - growth arrest and dna-damage-inducible, alpha, ADRB2 - adrenoceptor beta 2, surface, CTGF - connective…
GO:0031325	positive regulation of cellular metabolic process	0.000335	0.0454	1.24	[CREB5 - camp responsive element binding protein 5, GFI1 - growth factor independent 1 transcription repressor, AKAP9 - a kinase (prka) anchor protein (yotiao) 9, TRIM24 - tripartite motif containing 24, DHX33 - deah (asp-glu-ala-his) box polypeptide 33, GDF9 - growth differentiation factor 9, NFE2L3 - nuclear factor (erythroid-derived 2)-like 3, LIPT2 - lipoyl(octanoyl) transferase 2 (putative),…
GO:0035556	intracellular signal transduction	0.000335	0.045	1.36	[DEPTOR - dep domain containing mtor-interacting protein, DDX5 - dead (asp-glu-ala-asp) box helicase 5, AKAP9 - a kinase (prka) anchor protein (yotiao) 9, PJA2 - praja ring finger 2, e3 ubiquitin protein ligase, THEM4 - thioesterase superfamily member 4, GADD45A - growth arrest and dna-damage-inducible, alpha, TLK1 - tousled-like kinase 1, RELA - v-rel avian reticuloendotheliosis viral oncogene h…
GO:0048729	tissue morphogenesis	0.000336	0.0447	1.8	[PKD2 - polycystic kidney disease 2 (autosomal dominant), TPM1 - tropomyosin 1 (alpha), SEMA3A - sema domain, immunoglobulin domain (ig), short basic domain, secreted, (semaphorin) 3a, TNC - tenascin c, PTCH1 - patched 1, LRP6 - low density lipoprotein receptor-related protein 6, ACVR1 - activin a receptor, type i, MDM2 - mdm2 oncogene, e3 ubiquitin protein ligase, LIN7C - lin-7 homolog c (c. ele…
GO:1901653	cellular response to peptide	0.000341	0.0449	2.15	[PRKACA - protein kinase, camp-dependent, catalytic, alpha, INSR - insulin receptor, IGF1 - insulin-like growth factor 1 (somatomedin c), STAT1 - signal transducer and activator of transcription 1, 91kda, ADRB2 - adrenoceptor beta 2, surface, RHOQ - ras homolog family member q, CPEB2 - cytoplasmic polyadenylation element binding protein 2, FCGR2B - fc fragment of igg, low affinity iib, receptor (…
GO:0045216	cell-cell junction organization	0.00036	0.047	2.23	[CADM1 - cell adhesion molecule 1, MTDH - metadherin, RASSF8 - ras association (ralgds/af-6) domain family (n-terminal) member 8, TGFB2 - transforming growth factor, beta 2, F11R - f11 receptor, PLEKHA7 - pleckstrin homology domain containing, family a member 7, PVRL3 - poliovirus receptor-related 3, GRHL1 - grainyhead-like 1 (drosophila), MPP5 - membrane protein, palmitoylated 5 (maguk p55 subfa…
GO:0009799	specification of symmetry	0.000362	0.047	3.14	[PKD2 - polycystic kidney disease 2 (autosomal dominant), IFT74 - intraflagellar transport 74 homolog (chlamydomonas), NPHP3 - nephronophthisis 3 (adolescent), CCDC39 - coiled-coil domain containing 39, ARL6 - adp-ribosylation factor-like 6, ARMC4 - armadillo repeat containing 4, ACVR2A - activin a receptor, type iia, DAAM2 - dishevelled associated activator of morphogenesis 2, ACVR2B - activin a…
GO:0030258	lipid modification	0.000369	0.0474	2	[CROT - carnitine o-octanoyltransferase, TRAT1 - t cell receptor associated transmembrane adaptor 1, PIK3R3 - phosphoinositide-3-kinase, regulatory subunit 3 (gamma), FGF2 - fibroblast growth factor 2 (basic), PPARGC1A - peroxisome proliferator-activated receptor gamma, coactivator 1 alpha, ESR1 - estrogen receptor 1, SESN2 - sestrin 2, AUH - au rna binding protein/enoyl-coa hydratase, ETFDH - el…
GO:0051173	positive regulation of nitrogen compound metabolic process	0.000384	0.049	1.24	[CREB5 - camp responsive element binding protein 5, GFI1 - growth factor independent 1 transcription repressor, TRIM24 - tripartite motif containing 24, AKAP9 - a kinase (prka) anchor protein (yotiao) 9, DHX33 - deah (asp-glu-ala-his) box polypeptide 33, GDF9 - growth differentiation factor 9, NFE2L3 - nuclear factor (erythroid-derived 2)-like 3, RELA - v-rel avian reticuloendotheliosis viral onc…
GO:0051246	regulation of protein metabolic process	0.000407	0.0514	1.26	[DEPTOR - dep domain containing mtor-interacting protein, GFI1 - growth factor independent 1 transcription repressor, FN1 - fibronectin 1, AKAP9 - a kinase (prka) anchor protein (yotiao) 9, DHX33 - deah (asp-glu-ala-his) box polypeptide 33, GDF9 - growth differentiation factor 9, GADD45A - growth arrest and dna-damage-inducible, alpha, IL12A - interleukin 12a (natural killer cell stimulatory fact…
GO:0048661	positive regulation of smooth muscle cell proliferation	0.000425	0.0533	2.93	[ID2 - inhibitor of dna binding 2, dominant negative helix-loop-helix protein, IGF1 - insulin-like growth factor 1 (somatomedin c), STAT1 - signal transducer and activator of transcription 1, 91kda, MDM2 - mdm2 oncogene, e3 ubiquitin protein ligase, FGF2 - fibroblast growth factor 2 (basic), PPARGC1A - peroxisome proliferator-activated receptor gamma, coactivator 1 alpha, JAK2 - janus kinase 2, E…
GO:0009628	response to abiotic stimulus	0.000446	0.0555	1.45	[PRKACA - protein kinase, camp-dependent, catalytic, alpha, AKAP9 - a kinase (prka) anchor protein (yotiao) 9, CAPN2 - calpain 2, (m/ii) large subunit, F11R - f11 receptor, XPC - xeroderma pigmentosum, complementation group c, SLC8A1 - solute carrier family 8 (sodium/calcium exchanger), member 1, GADD45A - growth arrest and dna-damage-inducible, alpha, ADRB2 - adrenoceptor beta 2, surface, ADSS -…
GO:0007265	Ras protein signal transduction	0.000463	0.0571	2	[TIAM1 - t-cell lymphoma invasion and metastasis 1, RAB28 - rab28, member ras oncogene family, NCKAP1 - nck-associated protein 1, SHC1 - shc (src homology 2 domain containing) transforming protein 1, RHOQ - ras homolog family member q, RAB10 - rab10, member ras oncogene family, FGF2 - fibroblast growth factor 2 (basic), PLK2 - polo-like kinase 2, ARHGAP5 - rho gtpase activating protein 5, RAP2B -…
GO:0008285	negative regulation of cell proliferation	0.000477	0.0579	1.57	[IFITM1 - interferon induced transmembrane protein 1, TRIM24 - tripartite motif containing 24, PDE5A - phosphodiesterase 5a, cgmp-specific, FBXW7 - f-box and wd repeat domain containing 7, e3 ubiquitin protein ligase, CD274 - cd274 molecule, IL12A - interleukin 12a (natural killer cell stimulatory factor 1, cytotoxic lymphocyte maturation factor 1, p35), IFT74 - intraflagellar transport 74 homolo…
GO:0071310	cellular response to organic substance	0.000477	0.0584	1.39	[GFI1 - growth factor independent 1 transcription repressor, AKAP9 - a kinase (prka) anchor protein (yotiao) 9, CD274 - cd274 molecule, IL12A - interleukin 12a (natural killer cell stimulatory factor 1, cytotoxic lymphocyte maturation factor 1, p35), XRN1 - 5'-3' exoribonuclease 1, RELA - v-rel avian reticuloendotheliosis viral oncogene homolog a, TMEM173 - transmembrane protein 173, SPINT1 - ser…
GO:0060026	convergent extension	0.000487	0.0586	6.85	[FRZB - frizzled-related protein, NPHP3 - nephronophthisis 3 (adolescent), MKKS - mckusick-kaufman syndrome, LRP6 - low density lipoprotein receptor-related protein 6, WNT5A - wingless-type mmtv integration site family, member 5a]
GO:0014074	response to purine-containing compound	0.000491	0.0586	2.33	[PKD2 - polycystic kidney disease 2 (autosomal dominant), FDX1 - ferredoxin 1, P2RX7 - purinergic receptor p2x, ligand-gated ion channel, 7, AKAP6 - a kinase (prka) anchor protein 6, RAPGEF2 - rap guanine nucleotide exchange factor (gef) 2, PNPT1 - polyribonucleotide nucleotidyltransferase 1, AKAP9 - a kinase (prka) anchor protein (yotiao) 9, STAT1 - signal transducer and activator of transcripti…
GO:0032502	developmental process	0.000498	0.0591	1.17	[EMP1 - epithelial membrane protein 1, GFI1 - growth factor independent 1 transcription repressor, CHMP4C - charged multivesicular body protein 4c, RNPC3 - rna-binding region (rnp1, rrm) containing 3, CREG1 - cellular repressor of e1a-stimulated genes 1, WDR19 - wd repeat domain 19, GDF9 - growth differentiation factor 9, RELA - v-rel avian reticuloendotheliosis viral oncogene homolog a, BTD - bi…
GO:0001503	ossification	0.000512	0.0602	2.54	[IFITM1 - interferon induced transmembrane protein 1, BMP8A - bone morphogenetic protein 8a, TWSG1 - twisted gastrulation homolog 1 (drosophila), SUCO - sun domain containing ossification factor, SORT1 - sortilin 1, DDR2 - discoidin domain receptor tyrosine kinase 2, FAT4 - fat atypical cadherin 4, EXT1 - exostosin glycosyltransferase 1, CTGF - connective tissue growth factor, THBS3 - thrombospon…
GO:0016192	vesicle-mediated transport	0.000522	0.0609	1.34	[CHMP4C - charged multivesicular body protein 4c, FN1 - fibronectin 1, BET1 - bet1 golgi vesicular membrane trafficking protein, CREG1 - cellular repressor of e1a-stimulated genes 1, LRRC16A - leucine rich repeat containing 16a, CORO1C - coronin, actin binding protein, 1c, TMEM173 - transmembrane protein 173, BST2 - bone marrow stromal cell antigen 2, SEPP1 - selenoprotein p, plasma, 1, SPARC - s…
GO:0060341	regulation of cellular localization	0.000524	0.0607	1.51	[TIAM1 - t-cell lymphoma invasion and metastasis 1, PRKACA - protein kinase, camp-dependent, catalytic, alpha, PFN2 - profilin 2, FBXW7 - f-box and wd repeat domain containing 7, e3 ubiquitin protein ligase, SLC8A1 - solute carrier family 8 (sodium/calcium exchanger), member 1, RHOQ - ras homolog family member q, TMEM173 - transmembrane protein 173, GAB2 - grb2-associated binding protein 2, PPFIA…
GO:0048146	positive regulation of fibroblast proliferation	0.000545	0.0627	3.43	[BMI1 - bmi1 polycomb ring finger oncogene, ESR1 - estrogen receptor 1, FN1 - fibronectin 1, IGF1 - insulin-like growth factor 1 (somatomedin c), NDUFS4 - nadh dehydrogenase (ubiquinone) fe-s protein 4, 18kda (nadh-coenzyme q reductase), S100A6 - s100 calcium binding protein a6, DDR2 - discoidin domain receptor tyrosine kinase 2, GAS6 - growth arrest-specific 6, CDKN1A - cyclin-dependent kinase i…
GO:0051179	localization	0.000546	0.0618	1.18	[RSRC1 - arginine/serine-rich coiled-coil 1, DST - dystonin, CHMP4C - charged multivesicular body protein 4c, AKAP9 - a kinase (prka) anchor protein (yotiao) 9, BET1 - bet1 golgi vesicular membrane trafficking protein, CREG1 - cellular repressor of e1a-stimulated genes 1, WDR19 - wd repeat domain 19, LRRC16A - leucine rich repeat containing 16a, SLC31A2 - solute carrier family 31 (copper transpor…
GO:0070167	regulation of biomineral tissue development	0.000546	0.0623	2.86	[P2RX7 - purinergic receptor p2x, ligand-gated ion channel, 7, ACVR2A - activin a receptor, type iia, ACVR2B - activin a receptor, type iib, DDR2 - discoidin domain receptor tyrosine kinase 2, SLC8A1 - solute carrier family 8 (sodium/calcium exchanger), member 1, ADRB2 - adrenoceptor beta 2, surface, ATRAID - all-trans retinoic acid-induced differentiation factor, ACVR1 - activin a receptor, type…
GO:0071902	positive regulation of protein serine/threonine kinase activity	0.000563	0.0633	1.82	[TIAM1 - t-cell lymphoma invasion and metastasis 1, PKD2 - polycystic kidney disease 2 (autosomal dominant), SHC1 - shc (src homology 2 domain containing) transforming protein 1, PDE5A - phosphodiesterase 5a, cgmp-specific, ADRB2 - adrenoceptor beta 2, surface, GADD45A - growth arrest and dna-damage-inducible, alpha, ROR2 - receptor tyrosine kinase-like orphan receptor 2, RAF1 - v-raf-1 murine le…
GO:0010762	regulation of fibroblast migration	0.000567	0.0633	4.62	[FGF2 - fibroblast growth factor 2 (basic), C5orf30 - chromosome 5 open reading frame 30, PAK1 - p21 protein (cdc42/rac)-activated kinase 1, DDR2 - discoidin domain receptor tyrosine kinase 2, FER - fer (fps/fes related) tyrosine kinase, SLC8A1 - solute carrier family 8 (sodium/calcium exchanger), member 1, CORO1C - coronin, actin binding protein, 1c]
GO:0048518	positive regulation of biological process	0.000621	0.0688	1.15	[CREB5 - camp responsive element binding protein 5, GFI1 - growth factor independent 1 transcription repressor, CHMP4C - charged multivesicular body protein 4c, AKAP9 - a kinase (prka) anchor protein (yotiao) 9, TRIM24 - tripartite motif containing 24, DHX33 - deah (asp-glu-ala-his) box polypeptide 33, GDF9 - growth differentiation factor 9, NFE2L3 - nuclear factor (erythroid-derived 2)-like 3, L…
GO:0009967	positive regulation of signal transduction	0.000629	0.0692	1.34	[GFI1 - growth factor independent 1 transcription repressor, DDX5 - dead (asp-glu-ala-asp) box helicase 5, ITGA8 - integrin, alpha 8, DHX33 - deah (asp-glu-ala-his) box polypeptide 33, LURAP1L - leucine rich adaptor protein 1-like, GDF9 - growth differentiation factor 9, TRAT1 - t cell receptor associated transmembrane adaptor 1, GADD45A - growth arrest and dna-damage-inducible, alpha, IL12A - in…
GO:0032880	regulation of protein localization	0.000666	0.0728	1.46	[TIAM1 - t-cell lymphoma invasion and metastasis 1, FN1 - fibronectin 1, PRKACA - protein kinase, camp-dependent, catalytic, alpha, FBXW7 - f-box and wd repeat domain containing 7, e3 ubiquitin protein ligase, RHOQ - ras homolog family member q, CD274 - cd274 molecule, TMEM173 - transmembrane protein 173, SIX4 - six homeobox 4, PPFIA1 - protein tyrosine phosphatase, receptor type, f polypeptide (…
GO:0048660	regulation of smooth muscle cell proliferation	0.00068	0.0738	2.4	[ID2 - inhibitor of dna binding 2, dominant negative helix-loop-helix protein, IGF1 - insulin-like growth factor 1 (somatomedin c), TPM1 - tropomyosin 1 (alpha), STAT1 - signal transducer and activator of transcription 1, 91kda, PRKG1 - protein kinase, cgmp-dependent, type i, CDKN1A - cyclin-dependent kinase inhibitor 1a (p21, cip1), IL12A - interleukin 12a (natural killer cell stimulatory factor…
GO:0036294	cellular response to decreased oxygen levels	0.000689	0.0742	2.48	[RORA - rar-related orphan receptor a, HIPK2 - homeodomain interacting protein kinase 2, SLC8A1 - solute carrier family 8 (sodium/calcium exchanger), member 1, CPEB2 - cytoplasmic polyadenylation element binding protein 2, MDM2 - mdm2 oncogene, e3 ubiquitin protein ligase, CPEB4 - cytoplasmic polyadenylation element binding protein 4, NDNF - neuron-derived neurotrophic factor, PPARGC1A - peroxiso…
GO:0030155	regulation of cell adhesion	0.000691	0.0739	1.56	[FN1 - fibronectin 1, PDE5A - phosphodiesterase 5a, cgmp-specific, LRRC16A - leucine rich repeat containing 16a, UTRN - utrophin, CD274 - cd274 molecule, CORO1C - coronin, actin binding protein, 1c, IL12A - interleukin 12a (natural killer cell stimulatory factor 1, cytotoxic lymphocyte maturation factor 1, p35), PKP4 - plakophilin 4, IFT74 - intraflagellar transport 74 homolog (chlamydomonas), AB…
GO:0043410	positive regulation of MAPK cascade	0.000693	0.0736	1.62	[TIAM1 - t-cell lymphoma invasion and metastasis 1, SHC1 - shc (src homology 2 domain containing) transforming protein 1, HIPK2 - homeodomain interacting protein kinase 2, SEMA3A - sema domain, immunoglobulin domain (ig), short basic domain, secreted, (semaphorin) 3a, DHX33 - deah (asp-glu-ala-his) box polypeptide 33, PDE5A - phosphodiesterase 5a, cgmp-specific, DDR2 - discoidin domain receptor t…
GO:0045666	positive regulation of neuron differentiation	0.000696	0.0734	1.8	[TIAM1 - t-cell lymphoma invasion and metastasis 1, ZNF804A - zinc finger protein 804a, FN1 - fibronectin 1, TMEM106B - transmembrane protein 106b, GRIP1 - glutamate receptor interacting protein 1, SYT1 - synaptotagmin i, RIMS1 - regulating synaptic membrane exocytosis 1, ITGA3 - integrin, alpha 3 (antigen cd49c, alpha 3 subunit of vla-3 receptor), GOLGA4 - golgin a4, NFE2L2 - nuclear factor (ery…
GO:0014829	vascular smooth muscle contraction	0.000722	0.0756	6.36	[EDNRB - endothelin receptor type b, PIK3C2A - phosphatidylinositol-4-phosphate 3-kinase, catalytic subunit type 2 alpha, EDN1 - endothelin 1, MKKS - mckusick-kaufman syndrome, SLC8A1 - solute carrier family 8 (sodium/calcium exchanger), member 1]
GO:0070102	interleukin-6-mediated signaling pathway	0.000722	0.0751	6.36	[JAK2 - janus kinase 2, STAT1 - signal transducer and activator of transcription 1, 91kda, FER - fer (fps/fes related) tyrosine kinase, IL6ST - interleukin 6 signal transducer (gp130, oncostatin m receptor), IL6R - interleukin 6 receptor]
GO:0043406	positive regulation of MAP kinase activity	0.000736	0.0761	1.92	[TIAM1 - t-cell lymphoma invasion and metastasis 1, SHC1 - shc (src homology 2 domain containing) transforming protein 1, PDE5A - phosphodiesterase 5a, cgmp-specific, GADD45A - growth arrest and dna-damage-inducible, alpha, ROR2 - receptor tyrosine kinase-like orphan receptor 2, RAF1 - v-raf-1 murine leukemia viral oncogene homolog 1, FGF2 - fibroblast growth factor 2 (basic), JAK2 - janus kinase…
GO:0032922	circadian regulation of gene expression	0.000745	0.0764	3.3	[ID2 - inhibitor of dna binding 2, dominant negative helix-loop-helix protein, PPARGC1A - peroxisome proliferator-activated receptor gamma, coactivator 1 alpha, RORA - rar-related orphan receptor a, NCOA2 - nuclear receptor coactivator 2, LGR4 - leucine-rich repeat containing g protein-coupled receptor 4, CRY1 - cryptochrome 1 (photolyase-like), CLOCK - clock circadian regulator, PER1 - period ci…
GO:0034198	cellular response to amino acid starvation	0.00076	0.0775	3.56	[SESN1 - sestrin 1, IMPACT - impact rwd domain protein, NPRL2 - nitrogen permease regulator-like 2 (s. cerevisiae), SESN2 - sestrin 2, CDKN1A - cyclin-dependent kinase inhibitor 1a (p21, cip1), EIF2AK4 - eukaryotic translation initiation factor 2 alpha kinase 4, EIF2S1 - eukaryotic translation initiation factor 2, subunit 1 alpha, 35kda, SH3GLB1 - sh3-domain grb2-like endophilin b1, RRAGD - ras-r…
GO:0019752	carboxylic acid metabolic process	0.000766	0.0776	1.47	[FAAH - fatty acid amide hydrolase, CROT - carnitine o-octanoyltransferase, MCCC1 - methylcrotonoyl-coa carboxylase 1 (alpha), THEM4 - thioesterase superfamily member 4, SUCLG2 - succinate-coa ligase, gdp-forming, beta subunit, PSAT1 - phosphoserine aminotransferase 1, SUCLG1 - succinate-coa ligase, alpha subunit, ADSS - adenylosuccinate synthase, BTD - biotinidase, OSBP - oxysterol binding prote…
GO:0009267	cellular response to starvation	0.000786	0.0791	2.31	[GABARAPL1 - gaba(a) receptor-associated protein like 1, CADPS2 - ca++-dependent secretion activator 2, NPRL2 - nitrogen permease regulator-like 2 (s. cerevisiae), CDKN1A - cyclin-dependent kinase inhibitor 1a (p21, cip1), EIF2AK4 - eukaryotic translation initiation factor 2 alpha kinase 4, EIF2S1 - eukaryotic translation initiation factor 2, subunit 1 alpha, 35kda, RRAGD - ras-related gtp bindin…
GO:0061311	cell surface receptor signaling pathway involved in heart development	0.000808	0.0802	5.09	[SNAI1 - snail family zinc finger 1, JAG1 - jagged 1, HEY1 - hairy/enhancer-of-split related with yrpw motif 1, BMP4 - bone morphogenetic protein 4, WNT5A - wingless-type mmtv integration site family, member 5a, ACVR1 - activin a receptor, type i]
GO:1904752	regulation of vascular associated smooth muscle cell migration	0.000808	0.0807	5.09	[NFE2L2 - nuclear factor (erythroid-derived 2)-like 2, DOCK4 - dedicator of cytokinesis 4, TPM1 - tropomyosin 1 (alpha), PAK1 - p21 protein (cdc42/rac)-activated kinase 1, PRKG1 - protein kinase, cgmp-dependent, type i, MDM2 - mdm2 oncogene, e3 ubiquitin protein ligase]
GO:0071456	cellular response to hypoxia	0.000837	0.0826	2.52	[RORA - rar-related orphan receptor a, HIPK2 - homeodomain interacting protein kinase 2, SLC8A1 - solute carrier family 8 (sodium/calcium exchanger), member 1, CPEB2 - cytoplasmic polyadenylation element binding protein 2, MDM2 - mdm2 oncogene, e3 ubiquitin protein ligase, NDNF - neuron-derived neurotrophic factor, PPARGC1A - peroxisome proliferator-activated receptor gamma, coactivator 1 alpha, …
GO:0045860	positive regulation of protein kinase activity	0.000852	0.0835	1.62	[TIAM1 - t-cell lymphoma invasion and metastasis 1, PKD2 - polycystic kidney disease 2 (autosomal dominant), SHC1 - shc (src homology 2 domain containing) transforming protein 1, PRKACA - protein kinase, camp-dependent, catalytic, alpha, PDE5A - phosphodiesterase 5a, cgmp-specific, ACVR2B - activin a receptor, type iib, DDR2 - discoidin domain receptor tyrosine kinase 2, ROR2 - receptor tyrosine …
GO:0044281	small molecule metabolic process	0.000872	0.0849	1.31	[MCCC1 - methylcrotonoyl-coa carboxylase 1 (alpha), THEM4 - thioesterase superfamily member 4, SUCLG2 - succinate-coa ligase, gdp-forming, beta subunit, LRRC16A - leucine rich repeat containing 16a, SUCLG1 - succinate-coa ligase, alpha subunit, PPIP5K2 - diphosphoinositol pentakisphosphate kinase 2, BTD - biotinidase, OSBP - oxysterol binding protein, AASS - aminoadipate-semialdehyde synthase, EN…
GO:0006793	phosphorus metabolic process	0.000897	0.0868	1.29	[RSRC1 - arginine/serine-rich coiled-coil 1, AKAP9 - a kinase (prka) anchor protein (yotiao) 9, TRIM24 - tripartite motif containing 24, THEM4 - thioesterase superfamily member 4, SUCLG2 - succinate-coa ligase, gdp-forming, beta subunit, TRAT1 - t cell receptor associated transmembrane adaptor 1, SUCLG1 - succinate-coa ligase, alpha subunit, TLK1 - tousled-like kinase 1, PPIP5K2 - diphosphoinosit…
GO:0046854	phosphatidylinositol phosphorylation	0.000924	0.0889	2.5	[NRG2 - neuregulin 2, SOCS2 - suppressor of cytokine signaling 2, INPP1 - inositol polyphosphate-1-phosphatase, TRAT1 - t cell receptor associated transmembrane adaptor 1, PIP5K1B - phosphatidylinositol-4-phosphate 5-kinase, type i, beta, PIK3R3 - phosphoinositide-3-kinase, regulatory subunit 3 (gamma), FGF2 - fibroblast growth factor 2 (basic), HGF - hepatocyte growth factor (hepapoietin a; scat…
GO:0003356	regulation of cilium beat frequency	0.000991	0.0947	7.92	[CCSAP - centriole, cilia and spindle-associated protein, CCDC39 - coiled-coil domain containing 39, ARMC4 - armadillo repeat containing 4, MKKS - mckusick-kaufman syndrome]

## Sheet: Hallmark gene signatures
Supplementary Table 7. Functional categories analyses associated with 1,059 genes related to de novo activated regions in MM. Common terms between all the methods, belonging to one of three main categories: 1) related to ossification/osteoblast differentiation, 2) related to main signaling pathways or 3) related to oxidative stress or stress response, are highlighted in different color
ossification/osteoblast differentiation
signaling pathways
oxidative stress and stress response
Gene Set Name	Description	p-value	FDR q-value	Genes
HALLMARK_EPITHELIAL_MESENCHYMAL_TRANSITION	Genes defining epithelial-mesenchymal transition, as in wound healing, fibrosis and metastasis.	4.58e-15	2.29e-13	ITGAV, GADD45A, ID2, PMEPA1, TNC, CTGF, PLOD2, WNT5A, VCAN, LAMC1, FN1, DST, FBN1, DKK1, FSTL1, SPARC, CADM1, FGF2, LAMA2, FBLN2, NID2, GPX7, NNMT, PFN2, SNTB1, TPM1, VEGFC, CALU
HALLMARK_IL2_STAT5_SIGNALING	Genes up-regulated by STAT5 in response to IL2 stimulation.	3.49e-14	8.73e-13	ITGAV, NFIL3, PHLDA1, NDRG1, BCL2, ENO3, RRAGD, RORA, TIAM1, CISH, GABARAPL1, PTCH1, EMP1, HIPK2, BMPR2, ALCAM, UCK2, COL6A1, CYFIP1, FAM126B, POU2F1, TWSG1, SLC39A8, NFKBIZ, SH3BGRL2, SOCS2, MAPKAPK2
HALLMARK_TNFA_SIGNALING_VIA_NFKB	Genes regulated by NF-kB in response to TNF [GeneID=7124].	7.59e-11	1.27e-09	GADD45A, ID2, PMEPA1, TNC, NFIL3, PHLDA1, CDKN1A, PLK2, DRAM1, TIPARP, CCND1, IL6ST, IRF1, IFIH1, PTGS2, JAG1, PDLIM5, RELA, EDN1, RCAN1, NFE2L2, PER1, CCNL1
HALLMARK_ADIPOGENESIS	Genes up-regulated during adipocyte differentiation (adipogenesis).	4.61e-10	5.76e-09	GADD45A, STOM, GBE1, DHCR7, ME1, QDPR, SUCLG1, GPD2, MGST3, NDUFB7, ITSN1, EPHX2, ADCY6, GPHN, RTN3, RNF11, CHCHD10, MCCC1, SQRDL, REEP5, MAP4K3, CD302
HALLMARK_P53_PATHWAY	Genes involved in p53 pathways and networks.	2.66e-09	2.66e-08	GADD45A, NDRG1, CDKN1A, PLK2, DRAM1, STOM, DDIT4, FAM162A, PERP, SLC7A11, CCNG1, EPHX1, TGFA, F2R, CDKN2A, XPC, SESN1, MDM2, FBXW7, RAP2B, MAPKAPK3
HALLMARK_HYPOXIA	Genes up-regulated in response to low oxygen levels (hypoxia).	1.46e-08	1.22e-07	CTGF, NFIL3, NDRG1, BCL2, ENO3, RRAGD, RORA, CDKN1A, TIPARP, GBE1, DDIT4, FAM162A, TPBG, GLRX, PRKCA, PAM, EXT1, CP, PPARGC1A, TMEM45A
HALLMARK_ESTROGEN_RESPONSE_EARLY	Genes defining early response to estrogen.	7.58e-08	3.79e-07	BCL2, TIAM1, CISH, TIPARP, CCND1, IL6ST, DHCR7, TPBG, JAK2, SLC22A5, PAPSS2, PDLIM3, MYOF, NAV2, RHOBTB3, TBC1D30, SNX24, DEPTOR, GAB2
HALLMARK_ESTROGEN_RESPONSE_LATE	Genes defining late response to estrogen.	7.58e-08	3.79e-07	ID2, BCL2, TIAM1, CISH, CCND1, IL6ST, DHCR7, PERP, TPBG, JAK2, SLC22A5, PAPSS2, PDLIM3, MYOF, ALDH3A2, MDK, UNC13B, LSR, DNAJC1
HALLMARK_INTERFERON_GAMMA_RESPONSE	Genes up-regulated in response to IFNG [GeneID=3458].	7.58e-08	3.79e-07	CDKN1A, IRF1, IFIH1, PTGS2, JAK2, WARS, SRI, STAT1, STAT4, PLA2G4A, BST2, IRF9, PNPT1, CD274, ISOC1, EIF4E3, PELI1, APOL6, ST3GAL5
HALLMARK_MTORC1_SIGNALING	Genes up-regulated through activation of mTORC1 complex.	7.58e-08	3.79e-07	PLOD2, NFIL3, CDKN1A, GBE1, DHCR7, ME1, QDPR, DDIT4, SLC7A11, CCNG1, GLRX, WARS, PIK3R3, PSAT1, SSR1, IFRD1, PSMD14, MTHFD2L, UCHL5
HALLMARK_NOTCH_SIGNALING	Genes up-regulated by activation of Notch signaling.	2.86e-07	1.3e-06	WNT5A, CCND1, JAG1, PRKCA, FZD1, ST3GAL6, PSENEN, FZD7
HALLMARK_FATTY_ACID_METABOLISM	Genes encoding proteins involved in metabolism of fatty acids.	3.35e-07	1.33e-06	ENO3, GABARAPL1, ME1, SUCLG1, GPD2, EPHX1, SLC22A5, ALDH3A2, ETFDH, CPT1A, CPOX, ALAD, BCKDHB, AUH, PTPRG, SUCLG2
HALLMARK_GLYCOLYSIS	Genes encoding proteins involved in glycolysis and gluconeogenesis.	3.72e-07	1.33e-06	PLOD2, VCAN, RRAGD, ME1, DDIT4, FAM162A, TGFA, TPBG, GLRX, PAM, EXT1, TXN, AK3, GNPDA1, NDUFV3, PKP2, SRD5A3, HOMER1
HALLMARK_OXIDATIVE_PHOSPHORYLATION	Genes encoding proteins involved in oxidative phosphorylation.	3.72e-07	1.33e-06	SUCLG1, MGST3, NDUFB7, ETFDH, CPT1A, FDX1, PDK4, NDUFB4, COX5A, TOMM70A, MTX2, ETFA, ACADSB, NDUFA3, NDUFC2, NDUFS4, MRPL34, SLC25A20
HALLMARK_HEME_METABOLISM	Genes involved in metabolism of heme (a cofactor consisting of iron and porphyrin) and erythroblast differentiation.	1.72e-06	5.74e-06	MGST3, SLC7A11, CPOX, ALAD, NEK7, ARHGEF12, SMOX, RCL1, NUDT4, FECH, HBD, ADIPOR1, KLF3, SLC6A9, SLC30A1, PICALM, CAST
HALLMARK_UV_RESPONSE_DN	Genes down-regulated in response to ultraviolet (UV) radiation.	2.92e-06	9.12e-06	LAMC1, PDLIM5, PRKCA, SRI, PIK3R3, BCKDHB, NEK7, ACVR2A, ATXN1, ICA1, LPHN2, KIT, RND3, LTBP1
HALLMARK_ALLOGRAFT_REJECTION	Genes up-regulated during transplant rejection.	7.5e-06	1.97e-05	F2R, CDKN2A, JAK2, WARS, STAT1, STAT4, ACVR2A, TGFB2, ABCE1, EIF3J, FCGR2B, IL12A, TRAT1, CCR2, EIF3A, CD28
HALLMARK_COMPLEMENT	Genes encoding components of the complement system, which is part of the innate immune system.	7.5e-06	1.97e-05	FN1, IRF1, ME1, GPD2, CP, JAK2, PLA2G4A, FDX1, DOCK4, RAF1, ADAM9, SRC, ATOX1, CSRP1, CTSO, PREP
HALLMARK_MITOTIC_SPINDLE	Genes important for mitotic spindle assembly.	7.5e-06	1.97e-05	DST, TIAM1, PDLIM5, ITSN1, ARHGEF12, DOCK4, TUBGCP5, FGD4, ARHGAP5, ARHGEF3, PKD2, ALS2, PXN, CLIP1, SORBS2, TLK1
HALLMARK_ANDROGEN_RESPONSE	Genes defining response to androgens.	1.13e-05	2.82e-05	ITGAV, PMEPA1, NDRG1, CCND1, PDLIM5, SPCS3, SEPP1, IQGAP2, GPD1L, UAP1, CDC14B
HALLMARK_INFLAMMATORY_RESPONSE	Genes defining inflammatory response.	3.06e-05	7.28e-05	CDKN1A, IRF1, RELA, EDN1, TPBG, SRI, BST2, ACVR2A, RAF1, LAMP3, IFITM1, CALCRL, KCNMB2, SLC31A2, P2RX7
HALLMARK_UNFOLDED_PROTEIN_RESPONSE	Genes up-regulated during unfolded protein response, a cellular stress response related to the endoplasmic reticulum.	3.28e-05	7.44e-05	DDIT4, PSAT1, SSR1, SPCS3, SHC1, EIF2S1, IARS, DDX10, ATF6, WIPI1, SLC30A5
HALLMARK_INTERFERON_ALPHA_RESPONSE	Genes up-regulated in response to alpha interferon proteins.	4.53e-05	9.85e-05	IRF1, IFIH1, WARS, BST2, IRF9, PNPT1, LAMP3, IFITM1, GMPR, TMEM140
HALLMARK_APICAL_JUNCTION	Genes encoding components of apical junction complex.	0.000117	0.000233	VCAN, FBN1, MDK, CD274, PIK3R3, ADAM9, SRC, SHC1, CNTN1, PVRL3, GRB7, ITGA3, MPP5, THBS3
HALLMARK_XENOBIOTIC_METABOLISM	Genes encoding proteins involved in processing of drugs and other xenobiotics.	0.000117	0.000233	ID2, GABARAPL1, PDLIM5, EPHX1, PAPSS2, ETFDH, PDK4, SMOX, TGFB2, CROT, TNFRSF1A, IGF1, ESR1, SSR3
HALLMARK_WNT_BETA_CATENIN_SIGNALING	Genes up-regulated by activation of WNT signaling through accumulation of beta catenin CTNNB1 [GeneID=1499].	0.000258	0.000496	DKK1, PTCH1, JAG1, FZD1, HEY1, NCSTN
HALLMARK_REACTIVE_OXIGEN_SPECIES_PATHWAY	Genes up-regulated by reactive oxigen species (ROS).	0.000605	0.00112	GLRX, TXN, NDUFB4, ATOX1, FTL, GLRX2
HALLMARK_APOPTOSIS	Genes mediating programmed cell death (apoptosis) by activation of caspases.	0.000745	0.00133	GADD45A, EMP1, CDKN1A, CCND1, IRF1, RELA, F2R, TGFB2, DPYD, HGF, PAK1
HALLMARK_TGF_BETA_SIGNALING	Genes up-regulated in response to TGFB1 [GeneID=7040].	0.00102	0.00176	ID2, PMEPA1, HIPK2, BMPR2, SMAD1, ACVR1
HALLMARK_KRAS_SIGNALING_UP	Genes up-regulated by KRAS activation.	0.00136	0.00226	ID2, EMP1, PTGS2, GLRX, CROT, ZNF277, ETV1, ETV5, BTBD3, GALNT3, FBXO4, ATG10
HALLMARK_UV_RESPONSE_UP	Genes up-regulated in response to ultraviolet (UV) radiation.	0.00225	0.00363	IL6ST, IRF1, EPHX1, PDLIM3, CYB5R1, PLCL1, PPAT, PRKACA, CREG1, GGH
HALLMARK_BILE_ACID_METABOLISM	Genes involve in metabolism of bile acids and salts.	0.00289	0.00451	EPHX2, ISOC1, ATXN1, CROT, PEX1, BMP6, NUDT12, SLC23A1
HALLMARK_PROTEIN_SECRETION	Genes involved in protein secretion pathway.	0.00463	0.00702	DST, PAM, ICA1, ADAM10, BET1, GOLGA4, CAV2
HALLMARK_CHOLESTEROL_HOMEOSTASIS	Genes involved in cholesterol homeostasis.	0.00511	0.00752	NFIL3, ALCAM, JAG1, DHCR7, CPEB2, CBS
HALLMARK_ANGIOGENESIS	Genes up-regulated during formation of blood vessels (angiogenesis).	0.00714	0.0102	ITGAV, VCAN, FSTL1, JAG1
HALLMARK_COAGULATION	Genes encoding components of blood coagulation system; also up-regulated in platelets.	0.00997	0.0138	FN1, FBN1, SPARC, ADAM9, CSRP1, CTSO, PREP, CAPN2
HALLMARK_IL6_JAK_STAT3_SIGNALING	Genes up-regulated by IL6 [GeneID=3569] via STAT3 [GeneID=6774], e.g., during acute phase response.	0.0111	0.0149	IL6ST, IRF1, STAT1, IRF9, TNFRSF1A, LEPR
HALLMARK_MYC_TARGETS_V1	A subgroup of genes regulated by MYC - version 1 (v1).	0.0115	0.0151	IFRD1, PSMD14, COX5A, TOMM70A, ABCE1, EIF3J, EIF2S1, IARS, CNBP, U2AF1
HALLMARK_APICAL_SURFACE	Genes encoding proteins over-represented on the apical surface of epithelial cells, e.g., important for cell polarity (apical area).	0.0144	0.0185	ADAM10, GSTM3, SULF2, SCUBE1
HALLMARK_DNA_REPAIR	Genes involved in DNA repair.	0.0159	0.0198	ADCY6, XPC, AK3, ERCC8, DDB1, NFX1, POLR2I, TK2
HALLMARK_PEROXISOME	Genes encoding components of peroxisome.	0.0246	0.03	CADM1, EPHX2, ISOC1, ATXN1, CNBP, UGT2B17
HALLMARK_PI3K_AKT_MTOR_SIGNALING	Genes up-regulated by activation of the PI3K/AKT/mTOR pathway.	0.0256	0.0305	TIAM1, CDKN1A, PIK3R3, RAF1, TNFRSF1A, THEM4
HALLMARK_MYOGENESIS	Genes involved in development of skeletal muscle (myogenesis).	0.0292	0.0339	SPARC, FGF2, LAMA2, ENO3, CDKN1A, NAV2, IFRD1, IGF1, NCAM1
HALLMARK_HEDGEHOG_SIGNALING	Genes up-regulated by activation of hedgehog signaling.	0.0414	0.0471	PTCH1, HEY1, TLE1

## Sheet: GSEA_pathways
Supplementary Table 7. Functional categories analyses associated with 1,059 genes related to de novo activated regions in MM. Common terms between all the methods, belonging to one of three main categories: 1) related to ossification/osteoblast differentiation, 2) related to main signaling pathways or 3) related to oxidative stress or stress response, are highlighted in different color
ossification/osteoblast differentiation
signaling pathways
oxidative stress and stress response
pathway	pval	padj	Genes
REACTOME_ASPARAGINE_N_LINKED_GLYCOSYLATION	0.0020141	0.08	ST3GAL6, MAN2A1, MAN1A2, UAP1, GOLGB1, TFG, SLC17A5, MLEC, GANAB, ALG8, SEL1L, MCFD2
REACTOME_MEMBRANE_TRAFFICKING	0.00300601	0.08	MAN2A1, CPD, NAA35, MYO6, MAN1A2, VPS54, GOLGB1, SCARB2, TFG, PIK3C2A, GOLGA4, PLA2G4A, FCHO2, SBF2, DENND2C, MCFD2, SNX18, RAB6A, RHOBTB3, SORT1, RIC1, CHMP4C, DENND1B
REACTOME_VESICLE_MEDIATED_TRANSPORT	0.004	0.08	MAN2A1, CPD, NAA35, MYO6, MAN1A2, VPS54, GOLGB1, SCARB2, TFG, PIK3C2A, GOLGA4, PLA2G4A, FCHO2, SBF2, DENND2C, MCFD2, SNX18, RAB6A, RHOBTB3, SORT1, RIC1, CHMP4C, DENND1B, APOL1
KEGG_TGF_BETA_SIGNALING_PATHWAY	0.0219207	0.32881	BMP6, ZFYVE9, BMPR2, ACVR2A, ACVR1, ACVR2B, BMP8B
KEGG_CYTOKINE_CYTOKINE_RECEPTOR_INTERACTION	0.0511482	0.613779	IL6ST, BMPR2, ACVR2A, ACVR1, ACVR2B, IL12A, CCR2
REACTOME_NEUTROPHIL_DEGRANULATION	0.0643863	0.643863	ITGAV, GYG1, CREG1, SVIP, STOM, RAB3D, CYFIP1, COMMD3, MLEC, NCSTN, RAB6A
REACTOME_INTRACELLULAR_SIGNALING_BY_SECOND_MESSENGERS	0.101712	0.753333	INSR, BMI1, RRAGD, PIP5K1B, NBEA, CDKN1A
PID_P53_DOWNSTREAM_PATHWAY	0.104555	0.753333	CDKN1A, JMY, BCL2, DKK1, HGF, SESN1, DDX5, GADD45A, NDRG1, PERP, PCBP4
REACTOME_METABOLISM_OF_LIPIDS	0.113	0.753333	PIP5K1B, CPT1A, OSBP, PON2, CLOCK, PIK3C2A, PLA2G4A, FAR2, FITM2, KDSR, NCOA2, SPTLC1, SBF2, EPHX2, ALDH3A2, SUMF1, SLC44A1, NR1D1, DHCR7, FDX1, SRD5A3, NEU3, GRHL1, GPD1L, MAPKAPK2
REACTOME_SIGNALING_BY_RHO_GTPASES	0.192346	0.896274	ARHGAP5, FAM13A, CYFIP1, ARHGAP42, NCOA2, ARHGEF12, PAK1, PFN2, FGD4, PRKCA, ARHGAP32, CLIP1, ITSN1, TIAM1, PPP1R12B, ARHGEF3, SRC, NCKAP1, ARHGAP18, IQGAP2, ARHGAP23
REACTOME_TRANSCRIPTIONAL_REGULATION_BY_TP53	0.202429	0.896274	HIPK2, RRAGD, TXN, CDKN1A, JMY, SESN1, GADD45A, TAF4B, NDRG1, PERP, PCBP4, CDKN2A
REACTOME_SIGNALING_BY_NOTCH	0.219588	0.896274	ST3GAL6, NBEA, FBXW7, PRKCI, SEL1L, NCSTN, RAB6A, JAG1, MDK, STAT1, CNTN1
REACTOME_CLASS_I_MHC_MEDIATED_ANTIGEN_PROCESSING_PRESENTATION	0.23382	0.896274	ITGAV, FBXW7, PJA2, UBA5
NABA_ECM_GLYCOPROTEINS	0.235908	0.896274	NDNF, LAMC1, SMOC1
REACTOME_POST_TRANSLATIONAL_PROTEIN_MODIFICATION	0.241758	0.896274	ST3GAL6, MAN2A1, HIPK2, LAMC1, BMI1, MAN1A2, TTLL7, UAP1, FBXW7, GOLGB1, CALU, RAB3D, TFG, SLC17A5, COMMD3, MLEC, GANAB, FEM1C, ALG8, USP3, NCOA2, SEL1L, DNAJC24, MCFD2, SUMF1, RAB6A, STAG1, DDX5, LSAMP, OTUD7B, GAS6, SRD5A3, APOL1, LYPD6B, RAB3B, TOMM70, KLHL21, NEU3, IFIH1
KEGG_MAPK_SIGNALING_PATHWAY	0.242268	0.896274	RAPGEF2, MAP4K3, MAP3K13, PLA2G4A, PAK1, GADD45A, CHP1, MAPKAPK3, MAPKAPK2, PRKCA
REACTOME_SIGNALING_BY_RECEPTOR_TYROSINE_KINASES	0.258	0.896274	IGF1, ITGAV, RBFOX2, INSR, FER, YES1, LAMC1
KEGG_FOCAL_ADHESION	0.268882	0.896274	IGF1, ITGAV, ARHGAP5, LAMC1, CAPN2, BCL2, HGF, PAK1, ITGA8
KEGG_REGULATION_OF_ACTIN_CYTOSKELETON	0.307302	0.908408	ITGAV, RDX, PIP5K1B, CYFIP1, CFL2, ARHGEF12, PAK1, PFN2, ITGA8
REACTOME_INNATE_IMMUNE_SYSTEM	0.322	0.908408	ITGAV, YES1, GYG1, CREG1, SVIP, TXN, STOM, RAB3D, CYFIP1, COMMD3, MLEC, CCR2, NCSTN, BCL2, RAB6A, PELI1, PAK1
REACTOME_ORGANELLE_BIOGENESIS_AND_MAINTENANCE	0.339175	0.908408	USP46, AKAP9, NCOA2, TTBK2, LZTFL1, NR1D1
REACTOME_RESPONSE_TO_ELEVATED_PLATELET_CYTOSOLIC_CA2	0.350731	0.908408	IGF1, CALU, SELENOP, CYB5R1, HGF, GAS6, PRKCA, HABP4, SPARC
REACTOME_NERVOUS_SYSTEM_DEVELOPMENT	0.363363	0.908408	ITGAV, YES1, LAMC1, ABL2, RDX
NABA_CORE_MATRISOME	0.401031	0.923534	NDNF, LAMC1, SMOC1
REACTOME_PLATELET_ACTIVATION_SIGNALING_AND_AGGREGATION	0.480323	0.923534	IGF1, CALU, PLA2G4A, SELENOP, CYB5R1, HGF, RAPGEF4, GAS6, PRKCA, HABP4, RAF1, SPARC, SRC, SHC1
NABA_SECRETED_FACTORS	0.56288	0.923534	IGF1, BMP6, IL12A, BMP8B, HGF, NRG3, S100A6, MDK
REACTOME_FATTY_ACID_METABOLISM	0.573499	0.923534	CPT1A, PON2, PLA2G4A, EPHX2, ALDH3A2, MAPKAPK2, TBXAS1, SLC25A20, ELOVL7, PTGS2
REACTOME_SLC_MEDIATED_TRANSMEMBRANE_TRANSPORT	0.576289	0.923534	SLC39A8, SLC17A5, SLC30A1, SLC40A1, SLC44A1
REACTOME_DISEASES_OF_SIGNAL_TRANSDUCTION_BY_GROWTH_FACTOR_RECEPTORS_AND_SECOND_MESSENGERS	0.57673	0.923534	ZFYVE9, FBXW7, CDKN1A, GOLGA4, LRP6, AKAP9, SEL1L, NCSTN, KANK1, DKK1, HGF, NRG3, JAG1, JAK2, ETV6, STAT1, KIT, ESR1, RAF1, SRC, ADAM10, SHC1, PSENEN, TRIM24
REACTOME_CELLULAR_RESPONSES_TO_EXTERNAL_STIMULI	0.58006	0.923534	BMI1, RRAGD, TXN, CDKN1A, EIF2AK4, SESN1, FNIP2, MAPKAPK3, MAPKAPK2, NUDT2, CSRP1, CDKN2A, NPRL2, EPAS1, IMPACT, EIF2S1, ATOX1
REACTOME_DEVELOPMENTAL_BIOLOGY	0.584	0.923534	ITGAV, YES1, LAMC1, ABL2, RDX, PKP4, CDKN1A, ACVR2A, ACVR2B, NCOA2, NCSTN, ARHGEF12, DKK1, PAK1, GFI1, PFN2
REACTOME_HEMOSTASIS	0.606	0.923534	IGF1, ITGAV, YES1, CARMIL1, CALU, PLA2G4A, SELENOP, AK3, CYB5R1, HGF, RAPGEF4, F11R, GAS6, JAK2
REACTOME_TRANSMISSION_ACROSS_CHEMICAL_SYNAPSES	0.619588	0.923534	UNC13B, MYO6, NBEA, LIN7C, EPB41L1, PRKCA, GRIP1, GABRR2, SYT1, SRC, PPFIA1, KRAS, GRIK4, MDM2
REACTOME_EXTRACELLULAR_MATRIX_ORGANIZATION	0.633634	0.923534	ITGAV, LAMC1, CAST, DST, CRTAP, CAPN2, NCSTN, F11R, ITGA8, ADAM9, DDR2, PRKCA, LTBP1, ITGA3, SPARC, COL24A1, NCAM1, ADAM10
NABA_MATRISOME_ASSOCIATED	0.648649	0.923534	IGF1, BMP6, CTSO, LGALSL, IL12A, BMP8B, HGF, NRG3, ADAM9, S100A6, MDK
REACTOME_SIGNALING_BY_INTERLEUKINS	0.664665	0.923534	YES1, IL6ST, CDKN1A, STAT4, IL12A, CCR2, BCL2, HGF, PELI1, JAK2, MAPKAPK3, IL5RA, MAPKAPK2, STAT1, RORA, IL6R
REACTOME_DISEASE	0.666334	0.923534	ZFYVE9, BTD, YES1, GYG1, CAST, TXN, FBXW7, CDKN1A, GOLGA4, SLC17A5, CYFIP1, LRP6, ALG8, SLC40A1, AKAP9, CAPN2, SEL1L, NCSTN, KANK1, DKK1, HGF, NRG3, JAG1, FDX1, CHMP4C, SRD5A3, JAK2, TAF4B, ETV6, CALCRL, TSHR, STAT1, TBXAS1, DOLK, KIT, CDKN2A, WNT5A, MMACHC, ESR1
REACTOME_CYTOKINE_SIGNALING_IN_IMMUNE_SYSTEM	0.677	0.923534	RAPGEF2, YES1, IL6ST, CDKN1A, EIF4E3, STAT4, IL12A, CCR2, BCL2, HGF, PELI1, NRG3, JAK2, MAPKAPK3, IL5RA, MAPKAPK2, STAT1, RORA, KIT, IRF1, IL6R, RAF1, CCND1, BST2, PTGS2, NCAM1, SRC, SHC1
NABA_MATRISOME	0.684	0.923534	IGF1, BMP6, NDNF, LAMC1, SMOC1, CTSO, LGALSL, IL12A
REACTOME_ADAPTIVE_IMMUNE_SYSTEM	0.684052	0.923534	ITGAV, YES1, FBXW7, PJA2, CTSO, UBA5
REACTOME_MAPK_FAMILY_SIGNALING_CASCADES	0.684584	0.923534	RAPGEF2, IL6ST, HGF, PAK1, NRG3, JAK2, IL5RA, KIT, IL6R, RAF1, NCAM1, SRC, SHC1, FGF2, CDC14B, KRAS
REACTOME_SIGNALING_BY_NUCLEAR_RECEPTORS	0.692784	0.923534	CPT1A, NCOA2, BCL2, STAG1, KANK1, DDX5
REACTOME_SIGNALING_BY_WNT	0.694617	0.923534	PIP5K1B, LRP6, DKK1, BCL9, CXXC4, PRKCA, LGR4, WNT5A, CDC73
REACTOME_LEISHMANIA_INFECTION	0.76087	0.923534	YES1, TXN, CYFIP1, CALCRL, TSHR, WNT5A, ADRB2, SRC, NCKAP1
KEGG_PATHWAYS_IN_CANCER	0.78335	0.923534	IGF1, ITGAV, LAMC1, CDKN1A, TFG, BCL2, PTCH2, HGF, STAT1, PRKCA, KIT, CDKN2A, WNT5A, ITGA3, RAF1, CCND1, PTGS2
REACTOME_CELL_CYCLE_MITOTIC	0.796315	0.923534	CDKN1A, AKAP9, STAG1, CHMP4C, JAK2, PRKCA, CLIP1, CDKN2A, PPP1R12B, CCND1, SRC, VRK2, E2F6, TUBGCP5
REACTOME_NEURONAL_SYSTEM	0.798995	0.923534	UNC13B, MYO6, NBEA, PDLIM5, LIN7C, EPB41L1, RTN3, PRKCA, KCNN3, GRIP1, GABRR2, SYT1, SRC, PPFIA1, HOMER3
REACTOME_DISEASES_OF_METABOLISM	0.816495	0.923534	BTD, GYG1, ALG8, FDX1, SRD5A3, TBXAS1, DOLK, MMACHC
REACTOME_ESR_MEDIATED_SIGNALING	0.822547	0.923534	NCOA2, BCL2, STAG1, KANK1, DDX5, ESR1, CCND1, SRC, SHC1
REACTOME_CELL_CYCLE	0.826438	0.923534	CDKN1A, AKAP9, STAG1, CHMP4C, JAK2, PRKCA, PCBP4, SMARCA5, CLIP1, CDKN2A, PPP1R12B, CCND1, SRC
REACTOME_RNA_POLYMERASE_II_TRANSCRIPTION	0.831169	0.923534	MLLT3, HIPK2, YES1, BMI1, RRAGD, TXN, FBXW7, CDKN1A, JMY, ICE1, NR1D1, SESN1, GADD45A, JAG1, ZNF555, TAF4B, NDRG1, PERP, STAT1, PCBP4, ESRRG, ZNF706, RORA, KIT, CDKN2A, ESR1, U2AF1, CDC73
REACTOME_TRANSPORT_OF_SMALL_MOLECULES	0.844534	0.923534	STOM, SLC39A8, SLC17A5, SLC30A1, ANO10, SLC40A1, SEL1L, SLC44A1, CYB5R1, LRRC8A, LSR, SLC2A13, ANO5, MYO5B, SLC30A5, OSTM1, SGK3, RAF1
REACTOME_FLT3_SIGNALING	0.852577	0.923534	RAPGEF2, HGF, NRG3, JAK2, IL5RA, KIT, RAF1, NCAM1, SRC, SHC1
REACTOME_METABOLISM_OF_AMINO_ACIDS_AND_DERIVATIVES	0.861822	0.923534	AUH, QDPR, SLC44A1, SQOR
REACTOME_SIGNALING_BY_GPCR	0.874126	0.923534	NBEA, PLA2G4A, CCR2, ARHGEF12, PTCH2, PAK1, CALCRL, FGD4, TSHR, PRKCA, ITSN1, WNT5A, REEP5, TIAM1, ADRB2, ARHGEF3, SRC
REACTOME_INFECTIOUS_DISEASE	0.889225	0.923534	YES1, TXN, CYFIP1, CHMP4C, TAF4B, CALCRL, TSHR, WNT5A, ADRB2, SYT1, SRC, NCKAP1
REACTOME_METABOLISM_OF_VITAMINS_AND_COFACTORS	0.908142	0.923534	BTD, GPHN, SLC25A16, NADK2, PARP6, MMACHC, PTGS2
REACTOME_METABOLISM_OF_WATER_SOLUBLE_VITAMINS_AND_COFACTORS	0.908142	0.923534	BTD, GPHN, SLC25A16, NADK2, PARP6, MMACHC, PTGS2
REACTOME_THE_CITRIC_ACID_TCA_CYCLE_AND_RESPIRATORY_ELECTRON_TRANSPORT	0.971014	0.971014	ETFDH, NDUFS4, NDUFAF2, NDUFB4, NDUFC2, PDP2, SUCLG1, NDUFV3, SUCLG2

## Sheet: GSEA_Biological processes
Supplementary Table 7. Functional categories analyses associated with 1,059 genes related to de novo activated regions in MM. Common terms between all the methods, belonging to one of three main categories: 1) related to ossification/osteoblast differentiation, 2) related to main signaling pathways or 3) related to oxidative stress or stress response, are highlighted in different color
ossification/osteoblast differentiation
signaling pathways
oxidative stress and stress response
pathway	pval	padj	Genes
INTRACELLULAR_TRANSPORT	0.001998	0.300412	ZFYVE9, FER, RDX, MYO6, ATXN1, VPS54, SVIP, CPT1A, OSBP, TXN, STOM, DST, TMEM167A, FBXW7, GOLGB1, SCARB2, PRKCI, RAB3D, CDKN1A, WIPI1, TFG, SPCS3, SSR3, TBC1D12, LRP6, ERGIC2, ICE1, SEC63, TRAM1, GNPTAB, SEL1L, CORO1C, PREPL, TBC1D23, EPHX2, TMCC1, MCFD2, TMEM87A, CLMN, TMEM50B, TLK1, SNX18, RAB6A, ZFAND1, RHOBTB3, PAK1, SORT1, ANKRD50, SH3GLB1, SSR1, RIC1, CHMP4C, GAS6, CHP1, DENND1B, RAB3B, TOM…
REGULATION_OF_AUTOPHAGY	0.00201207	0.300412	ABL2, RRAGD, SVIP, FBXW7, TMEM59, EIF2AK4, LAMP3, TBC1D12, SPTLC1, MTDH, DRAM1, BCL2, HGF, SESN1, CISD2, SH3GLB1
CELLULAR_RESPONSE_TO_STARVATION	0.00204082	0.300412	CADPS2, BMPR2, RRAGD, CDKN1A, WIPI1, EIF2AK4, NFE2L2, MAP1LC3B2, GABARAPL1, CPEB4, BCL2, SESN1, SH3GLB1, XPR1, GAS6
BIOMINERALIZATION	0.00204082	0.300412	IGF1, BMP6, BMPR2, ATRAID, TMEM38B, ACVR2A, ACVR1, TUFT1, ACVR2B
BONE_MINERALIZATION	0.00205761	0.300412	IGF1, BMP6, BMPR2, ATRAID, TMEM38B, ACVR2A, ACVR1, TUFT1, ACVR2B
POSITIVE_REGULATION_OF_OSTEOBLAST_DIFFERENTIATION	0.00313152	0.341008	IGF1, BMP6, IL6ST, BMPR2, ATRAID, ACVR2A, ACVR1, ACVR2B, SUCO, HGF, JAG1, DDR2
PROCESS_UTILIZING_AUTOPHAGIC_MECHANISM	0.00400802	0.341008	ABL2, RRAGD, SVIP, FBXW7, TMEM59, WIPI1, EIF2AK4, LAMP3, TBC1D12, MAP1LC3B2, GABARAPL1, SPTLC1, SBF2, MTDH, DRAM1, BCL2, HGF, SESN1, CISD2, SH3GLB1, CHMP4C, TOMM70
ENDOTHELIUM_DEVELOPMENT	0.00416233	0.341008	BMP6, RAPGEF2, RDX, BMPR2, ACVR1, ACVR2B, SLC40A1, F11R, JAG1
CELLULAR_PROTEIN_CATABOLIC_PROCESS	0.005	0.341008	HIPK2, RNF148, RDX, RNF133, SVIP, ATRAID, FBXW7, NDFIP1, USP46, RNF11, CTSO, CLOCK, STT3B, LAMP3, NFE2L2, UBR3, USP3, CAPN2, SEL1L, FAM122A, UBXN4, NR1D1, PELI1, OTUD7B, RIC1, CHMP4C
REGULATION_OF_CELLULAR_CATABOLIC_PROCESS	0.006	0.341008	IGF1, INSR, HIPK2, ABL2, RDX, RRAGD, SVIP, CPT1A, ATRAID, FBXW7, ZBTB20, TMEM59, SCARB2, EIF2AK4, LAMP3, NFE2L2, TBC1D12, SPTLC1, MTDH, DRAM1, FAM122A, XRN1, BCL2, HGF, SESN1, CISD2, SH3GLB1, ADAM9, RIC1
GLYCOPROTEIN_METABOLIC_PROCESS	0.006	0.341008	IGF1, TMTC2, ST3GAL6, MAN2A1, NDNF, TET1, MAN1A2, BMPR2, TMEM59, STT3B, GANAB, ALG8, GNPTAB, SEL1L, NCSTN, MCFD2, BCL2, EXTL2
POSITIVE_REGULATION_OF_CELLULAR_CATABOLIC_PROCESS	0.00601202	0.341008	IGF1, INSR, RDX, SVIP, CPT1A, FBXW7, ZBTB20, TMEM59, EIF2AK4, NFE2L2, SPTLC1, MTDH, FAM122A, SESN1, SH3GLB1, ADAM9
PROTEIN_CONTAINING_COMPLEX_DISASSEMBLY	0.00614754	0.341008	INSR, RDX, CARMIL1, CAMSAP2, LRP6, MAP1LC3B2, GABARAPL1, TTBK2, CFL2, MRPL32, ZFAND1, CCSAP
PROTEIN_CATABOLIC_PROCESS	0.007	0.341008	HIPK2, RNF148, RDX, RNF133, SVIP, ATRAID, FBXW7, NDFIP1, USP46, RNF11, TIPARP, CTSO, CLOCK, STT3B, LAMP3, NFE2L2, UBR3, USP3, CAPN2, SEL1L, FAM122A, UBXN4, NR1D1, PELI1, OTUD7B, ADAM9, RIC1, CHMP4C
POSITIVE_REGULATION_OF_CATABOLIC_PROCESS	0.00700701	0.341008	IGF1, INSR, RDX, SVIP, CPT1A, FBXW7, ZBTB20, NDFIP1, TMEM59, TIPARP, EIF2AK4, NFE2L2, SPTLC1, MTDH, FAM122A, SESN1, SH3GLB1, ADAM9
RESPONSE_TO_STARVATION	0.00808081	0.354292	CADPS2, BMPR2, RRAGD, CDKN1A, WIPI1, EIF2AK4, NFE2L2, MAP1LC3B2, GABARAPL1, CPEB4, BCL2, SESN1, SH3GLB1, XPR1, GAS6
REGULATION_OF_CATABOLIC_PROCESS	0.00899101	0.354292	IGF1, INSR, HIPK2, ABL2, RDX, RRAGD, SVIP, CPT1A, ATRAID, FBXW7, ZBTB20, NDFIP1, TMEM59, SCARB2, TIPARP, EIF2AK4, LAMP3, NFE2L2, TBC1D12, SPTLC1, MTDH, DRAM1, FAM122A, XRN1, BCL2, HGF, SESN1, CISD2, SH3GLB1, ADAM9, RIC1
CELLULAR_COMPONENT_DISASSEMBLY	0.00902708	0.354292	INSR, LAMC1, RDX, CARMIL1, CAMSAP2, FBXW7, WIPI1, LRP6, MAP1LC3B2, CAPN2, GABARAPL1, TTBK2, CFL2, MRPL32, ZFAND1, DKK1, CCSAP, CISD2
GOLGI_VESICLE_TRANSPORT	0.00922131	0.354292	VPS54, GOLGB1, PRKCI, WIPI1, TFG, GOLGA4, ERGIC2, PREPL, MCFD2, RAB6A, SORT1, GAS6, KLHL21
REGULATION_OF_OSTEOBLAST_DIFFERENTIATION	0.0101729	0.371312	IGF1, BMP6, IL6ST, BMPR2, ATRAID, SMOC1, ACVR2A, ACVR1, ACVR2B, SUCO, HGF, DDX5, JAG1, DDR2
NEURON_APOPTOTIC_PROCESS	0.0113402	0.371424	OXR1, NDNF, HIPK2, FBXW7, PRKCI, FAM162A, NCSTN, CPEB4, BCL2
SKELETAL_SYSTEM_MORPHOGENESIS	0.0114823	0.371424	BMP6, BMPR2, TIPARP, ACVR2B, LRP6
RESPONSE_TO_OXYGEN_CONTAINING_COMPOUND	0.012987	0.371424	IGF1, OXR1, PAM, BMP6, RAPGEF2, UNC13B, INSR, FER, ADIPOR1, YES1, ABL2, RRAGD, CPT1A, TXN, CPEB2, ZBTB20, USP46, PRKCI, CDKN1A, STAT4, PIK3C2A, ACVR2B, CYFIP1, KLF3, NFE2L2, LRP6, IL12A, AKAP9, CAPN2, NCOA2, MTDH, NCSTN, CPEB4, KLF11, QDPR, XRN1, BCL2, ZFAND1, NR1D1, FECH, KANK1, DKK1, HGF, PELI1, PAK1, SESN1, GFI1, SORT1, JAG1, FDX1, ADAM9, GAS6, JAK2, GDAP2, CRY1, NDUFS4, CALCRL, HMGN3, NDUFAF2…
NEGATIVE_REGULATION_OF_CELL_DEVELOPMENT	0.013013	0.371424	IGF1, RAPGEF2, FBXW7, PTPRG, EIF2AK4, CORO1C, IFRD1, BCL2, NR1D1, SPART, KANK1, DKK1, PAK1, RTN4, GFI1, NRG3, JAG1
PEPTIDYL_TYROSINE_MODIFICATION	0.0130522	0.371424	IGF1, BMP6, INSR, HIPK2, FER, YES1, ABL2, IL6ST, FBXW7, ACVR1, IL12A
REGULATION_OF_ESTABLISHMENT_OF_PROTEIN_LOCALIZATION	0.014	0.371424	IGF1, PAM, BMP6, UNC13B, DNAJC1, SVIP, CPT1A, TXN, STOM, FBXW7, NDFIP1, USP46, CLOCK, SCAMP5, ICE1, BCL2, ZFAND1, NR1D1, PAK1, RAPGEF4, SH3GLB1, ADAM9, GAS6, CHP1, JAK2, IFIH1, HMGN3, NDUFAF2, MDK, CD274, PRKCA, RAB11FIP5, LGR4, WNT5A, TIAM1
NEGATIVE_REGULATION_OF_CELLULAR_COMPONENT_ORGANIZATION	0.014	0.371424	IGF1, BMP6, RAPGEF2, RDX, CARMIL1, TET1, SVIP, CAMSAP2, PTPRG, SCAMP5, CORO1C, TTBK2, IFRD1, XRN1, SPART, KANK1, DKK1, HGF, RTN4, GFI1, PFN2, FNIP2, LMO4
ORGANONITROGEN_COMPOUND_CATABOLIC_PROCESS	0.014985	0.371424	HIPK2, RNF148, RDX, RNF133, TET1, SVIP, ATRAID, AUH, FBXW7, NDFIP1, USP46, RNF11, TIPARP, CTSO, CLOCK, DPYD, STT3B, LAMP3, NFE2L2, UBR3, USP3, MOXD1, CAPN2, SEL1L, QDPR, FAM122A, SLC44A1, UBXN4, NR1D1, PELI1, OTUD7B, ADAM9, RIC1, CHMP4C, CHP1
PEPTIDYL_AMINO_ACID_MODIFICATION	0.015984	0.371424	IGF1, OXR1, BMP6, NDNF, INSR, HIPK2, FER, YES1, ABL2, NAA35, IL6ST, TTLL7, MAP3K13, TXN, FBXW7, CRTAP, PRKCI, RAB3D, CLOCK, ACVR1, STT3B, IL12A, ALG8, AKAP9, DNAJC24, PRDM5, TTBK2, MCFD2, BCL2, TLK1, RAB6A, DKK1, HGF, PAK1, GFI1, PLCL1, PFN2, KAT6B, FNIP2, GAS6, JAK2, DDR2, RAB3B, IFIH1, GPD1L, MAPKAPK3, MAPKAPK2
PROTEIN_LOCALIZATION_TO_MEMBRANE	0.016	0.371424	RAPGEF2, MPP5, RDX, STOM, TMEM59, PRKCI, RAB3D, MESD, GOLGA4, SSR3, LRP6, FCHO2, SEC63, TRAM1, PREPL, BCL2, LZTFL1, GPHN, TM9SF3, PAK1, F11R, SH3GLB1, SSR1, SLMAP, GAS6, CHP1, LIN7C, ETV5, RAB3B
BONE_DEVELOPMENT	0.0164609	0.371424	IGF1, BMP6, BMPR2, FBXW7, TMEM38B, LRP6
MODIFICATION_DEPENDENT_MACROMOLECULE_CATABOLIC_PROCESS	0.018	0.371424	HIPK2, RNF148, RNF133, SVIP, FBXW7, NDFIP1, USP46, RNF11, CLOCK, STT3B, NFE2L2, UBR3, USP3, SEL1L, FAM122A, UBXN4, PELI1
REGULATION_OF_CELL_DEVELOPMENT	0.01998	0.371424	IGF1, BMP6, MAN2A1, NDNF, RAPGEF2, ABL2, IL6ST, CARMIL1, BMPR2, MAP3K13, CAMSAP2, FBXW7, PTPRG, SCARB2, PRKCI, CLOCK, EIF2AK4, GOLGA4, CYFIP1, NFE2L2, CCR2, PDLIM5, CORO1C, IFRD1, BCL2, CYB5D2, NR1D1, SPART, KANK1, DKK1, HGF, PAK1, RTN4, GFI1, NRG3, F11R
REGULATION_OF_PROTEIN_LOCALIZATION	0.01998	0.371424	IGF1, PAM, BMP6, UNC13B, RDX, DNAJC1, SVIP, CPT1A, TXN, STOM, FBXW7, NDFIP1, USP46, TMEM59, PRKCI, CLOCK, MESD, SCAMP5, ICE1, TTBK2, BCL2, LZTFL1, ZFAND1, NR1D1, PAK1, RTN4, RAPGEF4, OTUD7B, SH3GLB1, ADAM9, GAS6, CHP1, JAK2, IFIH1, HMGN3, NDUFAF2, GPD1L, CCDC66, MDK, CD274, PRKCA
ENDOSOMAL_TRANSPORT	0.0201207	0.371424	ZFYVE9, VPS54, CORO1C, PREPL, TBC1D23, TMCC1, TMEM87A, TMEM50B, SNX18, RAB6A, RHOBTB3, SORT1, ANKRD50, RIC1, CHMP4C, DENND1B
POSITIVE_REGULATION_OF_OSSIFICATION	0.0203459	0.371424	IGF1, BMP6, IL6ST, BMPR2, ATRAID, ACVR2A, ACVR1, ACVR2B, SUCO
REGULATION_OF_LIPID_BIOSYNTHETIC_PROCESS	0.0208768	0.371424	BMP6, ADIPOR1, FBXW7, ZBTB20, FITM2, CAPN2, NR1D1, GFI1, DHCR7
RECEPTOR_SIGNALING_PATHWAY_VIA_STAT	0.0228928	0.371424	IGF1, FER, ADIPOR1, IL6ST, STAT4, IL12A, CCR2
REGULATION_OF_CELL_MORPHOGENESIS_INVOLVED_IN_DIFFERENTIATION	0.0251509	0.371424	RAPGEF2, CARMIL1, BMPR2, MAP3K13, GOLGA4, CYFIP1, PDLIM5, CORO1C, IFRD1, SPART, KANK1, PAK1, RTN4
PEPTIDE_SECRETION	0.026	0.371424	IGF1, ITGAV, PAM, BMP6, UNC13B, DNAJC1, CPT1A, TMEM167A, RAB3D, CLOCK, ACVR2B, SCAMP5, GNPTAB, SEL1L, NR1D1, RAPGEF4, ADAM9, GAS6, SNX19, JAK2, RAB3B, IFIH1, HMGN3, NDUFAF2, MDK, CD274, PRKCA, RAB11FIP5, LGR4, ITSN1, WNT5A, TIAM1
LIPID_BIOSYNTHETIC_PROCESS	0.027	0.371424	ST3GAL6, BMP6, ADIPOR1, PIP5K1B, OSBP, FBXW7, ZBTB20, TMEM38B, PIK3C2A, PLA2G4A, FITM2, KDSR, CAPN2, SPTLC1, EPHX2, CNBP, ALDH3A2, SLC44A1, NR1D1, CYB5R1, GFI1, DHCR7, FDX1, SRD5A3
POSITIVE_REGULATION_OF_CELL_CYCLE_PROCESS	0.027551	0.371424	IGF1, CSPP1, INSR, RDX, PKP4, CDKN1A
ORGANONITROGEN_COMPOUND_BIOSYNTHETIC_PROCESS	0.027972	0.371424	IGF1, TMTC2, ITGAV, ST3GAL6, MAN2A1, MGST3, TET1, MAN1A2, BMPR2, DNAJC1, SVIP, CPEB2, TMEM59, PPA2, WIPI1, EIF4E3, EIF2AK4, DPYD, STT3B, CYFIP1, PLA2G4A, NFE2L2, ALG8, KDSR, MOXD1, CAPN2, SPTLC1, DNAJC24, NCSTN, CPEB4, AK3, MRPL32, QDPR, CNBP, MCFD2, ALDH3A2, XRN1, EIF3J, SLC44A1, BCL2, EXTL2, TK2, FECH, CNPY2, GPHN
NEGATIVE_REGULATION_OF_BIOSYNTHETIC_PROCESS	0.027972	0.371424	ITGAV, RBFOX2, BMP6, RAPGEF2, HIPK2, BMI1, ATXN1, CREG1, TET1, BMPR2, TXN, CPEB2, NFIL3, FBXW7, ZBTB20, TMEM59, CLOCK, EIF2AK4, ACVR2B, KLF3, USP3, NCOA2, MTDH, PRDM5, CPEB4, KLF11, CNBP, ZBTB38, XRN1, RIOX2, NR1D1, DKK1, DUSP26, GFI1, DDX5, OTUD7B, KAT6B, BRMS1L, FNIP2, GAS6, NFE2L3, CRY1, PURA, ETV6
NEGATIVE_REGULATION_OF_ORGANELLE_ORGANIZATION	0.0285714	0.371424	IGF1, RDX, CARMIL1, TET1, CAMSAP2, TTBK2, XRN1, KANK1, HGF, PFN2, FNIP2
REGULATION_OF_CELL_SIZE	0.0286885	0.371424	RDX, BMPR2, MAP3K13, GOLGA4, CYFIP1, DEPTOR, IFRD1, SPART, PAK1, RTN4, LRRC8A
MONOCARBOXYLIC_ACID_METABOLIC_PROCESS	0.029	0.371424	IGF1, PAM, BTD, INSR, ADIPOR1, AIG1, CPT1A, OSBP, AUH, ZBTB20, PON2, PLA2G4A, ETFDH, EPHX2, ALDH3A2
SENSORY_SYSTEM_DEVELOPMENT	0.0290581	0.371424	BMP6, MAN2A1, CRYBG3, HIPK2, BMPR2, SMOC1, PRKCI, ACVR2B, LRP6
REGIONALIZATION	0.0291751	0.371424	MLLT3, HIPK2, BMI1, BMPR2, ACVR2A, ACVR1, ACVR2B, LRP6, TMEM107, DKK1
ORGANIC_ACID_METABOLIC_PROCESS	0.02997	0.371424	IGF1, ST3GAL6, PAM, NDNF, BTD, INSR, ADIPOR1, AIG1, MGST3, CARMIL1, CPT1A, OSBP, AUH, ZBTB20, PPA2, PON2, DPYD, PLA2G4A
GLYCOPROTEIN_BIOSYNTHETIC_PROCESS	0.0300601	0.371424	IGF1, TMTC2, ST3GAL6, MAN2A1, TET1, MAN1A2, BMPR2, TMEM59, STT3B, ALG8, NCSTN, MCFD2, BCL2, EXTL2
ORGANIC_HYDROXY_COMPOUND_BIOSYNTHETIC_PROCESS	0.0312815	0.371424	BMP6, RAPGEF2, OSBP, MOXD1, SPTLC1, QDPR, CNBP, NR1D1, CYB5R1, GFI1, PLCL1, DHCR7, SRD5A3
POSITIVE_REGULATION_OF_DEVELOPMENTAL_GROWTH	0.031893	0.371424	IGF1, INSR, BMPR2, MAP3K13, GOLGA4, CYFIP1, BCL2, PAK1
CELLULAR_RESPONSE_TO_EXTERNAL_STIMULUS	0.0320641	0.371424	CADPS2, BMP6, BMPR2, RRAGD, CDKN1A, WIPI1, EIF2AK4, NFE2L2, MAP1LC3B2, GABARAPL1, CPEB4, BCL2, SESN1, F11R, GADD45A, SH3GLB1, XPR1, GAS6
CELL_MOTILITY	0.032967	0.371424	IGF1, ITGAV, RBFOX2, NDNF, RAPGEF2, INSR, FER, ADIPOR1, YES1, LAMC1, ABL2, RDX, CARMIL1, BMPR2, DST, FBXW7, PTPRG, PRKCI, JMY, ACVR1, PIK3C2A, C5orf30, NFE2L2, MCC, IL12A, CCR2, CORO1C, TTBK2, NAV1, BCL2, KANK1, HGF, PAK1, RTN4, CCSAP, NRG3, F11R, CFAP44, ARMC2, PFN2, JAG1, LMO4, ADAM9, GAS6, JAK2, TNS3, DDR2
MYELOID_LEUKOCYTE_MEDIATED_IMMUNITY	0.0330993	0.371424	ITGAV, FER, GYG1, CREG1, SVIP, STOM, RAB3D, CYFIP1, COMMD3, MLEC, CCR2, NCSTN
LIPID_LOCALIZATION	0.0330993	0.371424	ITGAV, BMP6, CPT1A, OSBP, FBXW7, SCARB2, TEX2, PLA2G4A, LRP6, FITM2, NCOA2
POSITIVE_REGULATION_OF_CELLULAR_COMPONENT_ORGANIZATION	0.033966	0.371424	IGF1, LRRN1, NDNF, RAPGEF2, UNC13B, INSR, FER, ABL2, CARMIL1, TET1, BMPR2, MAP3K13, FBXW7, SCARB2, PRKCI, JMY, FAM162A, MESD, GOLGA4, CYFIP1, NFE2L2, AKAP9, ICE1, CAPN2, FAM98A, PRDM5, CORO1C, CFL2
REGULATION_OF_CELL_PROJECTION_ORGANIZATION	0.033966	0.371424	NDNF, RAPGEF2, FER, ABL2, RDX, CARMIL1, BMPR2, MAP3K13, CAMSAP2, PTPRG, SCARB2, PRKCI, GOLGA4, CYFIP1, NFE2L2, PDLIM5, FAM98A, CORO1C, IFRD1, SPART, KANK1, DKK1, HGF, PAK1, RTN4, GFI1
POSITIVE_REGULATION_OF_CELL_GROWTH	0.0340206	0.371424	IGF1, BMPR2, MAP3K13, GOLGA4, CYFIP1, FAM122A, BCL2, PAK1
STEROID_BIOSYNTHETIC_PROCESS	0.0354906	0.371424	BMP6, OSBP, CNBP, NR1D1, CYB5R1, GFI1, DHCR7, FDX1, SRD5A3
CELLULAR_RESPONSE_TO_OXYGEN_CONTAINING_COMPOUND	0.035964	0.371424	IGF1, OXR1, BMP6, RAPGEF2, UNC13B, INSR, FER, ADIPOR1, YES1, ABL2, RRAGD, CPT1A, TXN, CPEB2, ZBTB20, PRKCI, PIK3C2A, CYFIP1, KLF3, NFE2L2, LRP6, IL12A, AKAP9, CAPN2, MTDH, NCSTN, CPEB4, KLF11, XRN1, ZFAND1, NR1D1, FECH, KANK1, HGF, PAK1, SESN1, GFI1, FDX1, ADAM9, GAS6, JAK2, CALCRL, HMGN3, NDUFAF2, TSHR, CD274, GLRX2, STAT1, PRKCA
CELLULAR_LIPID_METABOLIC_PROCESS	0.035964	0.371424	ST3GAL6, PAM, ADIPOR1, AIG1, PIP5K1B, CPT1A, AUH, FBXW7, TMEM38B, PON2, TEX2, PIK3C2A, PLA2G4A, FITM2, ALG8, KDSR, CAPN2, ETFDH, SPTLC1, SEL1L, EPHX2, ALDH3A2, SUMF1, SLC44A1
METAL_ION_HOMEOSTASIS	0.036036	0.371424	TMTC2, ITGAV, BMP6, ABL2, NDFIP1, TMEM38B, SLC39A8, RMDN3, LRP6, TMCO1, SLC30A1, SLC40A1, CCR2, SLC31A2, EPHX2, BCL2
ESTABLISHMENT_OF_PROTEIN_LOCALIZATION_TO_ORGANELLE	0.0360721	0.371424	FBXW7, USP46, SCARB2, CDKN1A, LAMP3, SPCS3, SSR3, SEC63, TRAM1, GNPTAB, EPHX2, BCL2, SH3GLB1, CHP1, TOMM70
POSITIVE_REGULATION_OF_INTRACELLULAR_TRANSPORT	0.0375783	0.371424	RDX, STOM, FBXW7, ICE1, ZFAND1, PAK1, SH3GLB1, GAS6, CHP1
REGULATION_OF_VESICLE_MEDIATED_TRANSPORT	0.0381143	0.371424	ITGAV, CADPS2, UNC13B, FER, ABL2, RDX, USP46, RAB3D, CYFIP1, SCAMP5, CCR2, PREPL, DKK1, RAPGEF4, PFN2, GAS6, RAB3B
OSTEOBLAST_DIFFERENTIATION	0.0381526	0.371424	IGF1, BMP6, IL6ST, BMPR2, ATRAID, SMOC1, ACVR2A, ACVR1, ACVR2B, SUCO, HGF, DDX5, RRBP1, JAG1, DDR2
POSITIVE_REGULATION_OF_CELLULAR_PROTEIN_LOCALIZATION	0.0383838	0.371424	RDX, STOM, FBXW7, PRKCI, MESD, ICE1, BCL2, ZFAND1, PAK1, RTN4, SH3GLB1, GAS6, CHP1, GPD1L
CELLULAR_RESPONSE_TO_ENDOGENOUS_STIMULUS	0.038961	0.371424	IGF1, RBFOX2, BMP6, RAPGEF2, ZFYVE9, INSR, HIPK2, FER, ADIPOR1, YES1, RDX, BMPR2, RRAGD, CPEB2, TMEM38B, PRKCI, ACVR2A, CLOCK, ACVR1, PIK3C2A, ACVR2B, CYFIP1, KLF3, UBA5, NFE2L2, AKAP9, CAPN2, NCOA2, NCSTN, CPEB4, KLF11, XRN1, NR1D1, SPART, FECH, KANK1, DKK1, PAK1, SESN1, DDX5, SORT1, F11R, ITGA8, FDX1, ADAM9
REGULATION_OF_CELLULAR_COMPONENT_SIZE	0.0390782	0.371424	FER, RDX, CARMIL1, BMPR2, MAP3K13, JMY, GOLGA4, CYFIP1, DEPTOR, IFRD1, CFL2, SPART, KANK1, PAK1, RTN4, PFN2, LRRC8A, RAB3B
CELL_ACTIVATION_INVOLVED_IN_IMMUNE_RESPONSE	0.0400802	0.371424	ITGAV, FER, GYG1, CREG1, SVIP, STOM, NDFIP1, RAB3D, EIF2AK4, CYFIP1, COMMD3, MLEC, CCR2, NCSTN
CELL_JUNCTION_ORGANIZATION	0.0400802	0.371424	BMP6, RAPGEF2, LAMC1, MPP5, RDX, RASSF8, PKP4, DST, PRKCI
POSITIVE_REGULATION_OF_GROWTH	0.0414141	0.371424	IGF1, INSR, BMPR2, MAP3K13, GOLGA4, CYFIP1, FAM122A, BCL2, PAK1
POSITIVE_REGULATION_OF_CELL_ACTIVATION	0.0418367	0.371424	IGF1, YES1, IL6ST, CDKN1A, IL12A, CCR2, BCL2, PELI1, PAK1, F11R, GAS6, JAK2, MDK, CD274
CELLULAR_RESPONSE_TO_INSULIN_STIMULUS	0.0418367	0.371424	INSR, FER, ADIPOR1, CPEB2, PRKCI, PIK3C2A, CYFIP1
REGULATION_OF_PROTEIN_MODIFICATION_PROCESS	0.041958	0.371424	IGF1, OXR1, BMP6, RAPGEF2, INSR, HIPK2, FER, YES1, MAP4K3, BMI1, IL6ST, TET1, BMPR2, MAP3K13, SVIP, TXN, FBXW7, CRTAP, NDFIP1, GPRC5D, TMEM59, CDKN1A, PJA2, ACVR2A, ACVR1, EIF2AK4, CCNL1, ACVR2B, LRP6, IL12A, AKAP9, DEPTOR, PRDM5, CORO1C, BMP8B, FAM122A, BCL2, DKK1, HGF, PELI1, RELL1, PAK1, DUSP26, GFI1, NRG3, PLCL1, GADD45A, PFN2, FNIP2, MAGI3, ADAM9, GAS6, CHP1, JAK2, DDR2, CRY1, NDUFS4
REGULATION_OF_NEURON_PROJECTION_DEVELOPMENT	0.042	0.371424	NDNF, RAPGEF2, ABL2, BMPR2, MAP3K13, CAMSAP2, PTPRG, SCARB2, PRKCI, GOLGA4, CYFIP1, NFE2L2, PDLIM5, IFRD1, SPART, KANK1, DKK1, HGF, PAK1, RTN4, GFI1
CELLULAR_RESPONSE_TO_EXTRACELLULAR_STIMULUS	0.0430862	0.371424	CADPS2, BMPR2, RRAGD, CDKN1A, WIPI1, EIF2AK4, NFE2L2, MAP1LC3B2, GABARAPL1, CPEB4, BCL2, SESN1, SH3GLB1, XPR1, GAS6
POSITIVE_REGULATION_OF_PEPTIDYL_TYROSINE_PHOSPHORYLATION	0.043299	0.371424	IGF1, BMP6, YES1, IL6ST, FBXW7, ACVR1, IL12A, HGF, GAS6, JAK2, KIT, CNTN1, IL6R
REGULATION_OF_AXONOGENESIS	0.0438413	0.371424	BMPR2, MAP3K13, GOLGA4, CYFIP1, IFRD1, SPART, PAK1, RTN4
REGULATION_OF_DEVELOPMENTAL_GROWTH	0.0440882	0.371424	IGF1, INSR, BMPR2, MAP3K13, CDKN1A, GOLGA4, CYFIP1, IFRD1, BCL2, SPART, PAK1, RTN4
REGULATION_OF_OSSIFICATION	0.0440882	0.371424	IGF1, BMP6, IL6ST, BMPR2, ATRAID, SMOC1, ACVR2A, ACVR1, ACVR2B, SUCO, BCL2, DKK1, HGF, DDX5, JAG1, DDR2
DEVELOPMENTAL_CELL_GROWTH	0.0442656	0.371424	IGF1, BMPR2, MAP3K13, EIF2AK4, GOLGA4, CYFIP1, PDLIM5, IFRD1, SPART, PAK1, RTN4
REGULATION_OF_INTRACELLULAR_TRANSPORT	0.0442656	0.371424	FER, RDX, SVIP, TXN, STOM, FBXW7, ICE1, ZFAND1, PAK1, SH3GLB1, GAS6, CHP1
CELLULAR_MACROMOLECULE_CATABOLIC_PROCESS	0.047952	0.377571	HIPK2, RNF148, RDX, RNF133, SVIP, ATRAID, FBXW7, NDFIP1, USP46, RNF11, CTSO, CLOCK, STT3B, LAMP3, NFE2L2, UBR3, USP3, CAPN2, SEL1L, FAM122A, XRN1, UBXN4, NR1D1, PELI1, DDX5, OTUD7B, RIC1, CHMP4C
POSITIVE_REGULATION_OF_ESTABLISHMENT_OF_PROTEIN_LOCALIZATION	0.0480962	0.377571	IGF1, BMP6, UNC13B, STOM, FBXW7, SCAMP5, ICE1, BCL2, ZFAND1, PAK1, SH3GLB1, ADAM9, GAS6, CHP1, JAK2, IFIH1, MDK, CD274
REGULATION_OF_PROTEIN_POLYMERIZATION	0.0484536	0.377571	FER, RDX, CARMIL1, CAMSAP2, JMY, CYFIP1, AKAP9, KANK1, PAK1, PFN2
CELLULAR_HOMEOSTASIS	0.048951	0.377571	ITGAV, BMP6, UNC13B, ABL2, TXN, FBXW7, ZBTB20, NDFIP1, TMEM38B, SLC39A8, RMDN3, NFE2L2, LRP6, FITM2, TMCO1, SLC30A1, SLC40A1, CCR2, SLC31A2, EPHX2, CFL2, TMX2, BCL2, NR1D1, RTN4, PLCL1, XPR1, GAS6, CHP1, LRRC8A, JAK2
VIRAL_LIFE_CYCLE	0.0489796	0.377571	ITGAV, STOM, SCARB2, EIF2AK4, LAMP3, BCL2, DDX5, F11R, XPR1, CHMP4C, GAS6
CELLULAR_RESPONSE_TO_NITROGEN_COMPOUND	0.049	0.377571	IGF1, RAPGEF2, INSR, FER, ADIPOR1, RRAGD, CPEB2, TMEM38B, PRKCI, PIK3C2A, CYFIP1, KLF3, NFE2L2, AKAP9, CAPN2, NCSTN, CPEB4, KLF11, XRN1, KANK1, PAK1, SESN1
MACROMOLECULE_CATABOLIC_PROCESS	0.04995	0.377571	HIPK2, RNF148, RDX, RNF133, SVIP, ATRAID, FBXW7, NDFIP1, USP46, RNF11, TIPARP, CTSO, CLOCK, STT3B, LAMP3, NFE2L2, UBR3, USP3, CAPN2, SEL1L, FAM122A, XRN1, UBXN4, NR1D1, PELI1, DDX5, OTUD7B, SH3GLB1, ADAM9, RIC1, CHMP4C, CHP1
REGULATION_OF_INTRACELLULAR_PROTEIN_TRANSPORT	0.0504115	0.377571	SVIP, TXN, STOM, FBXW7, ICE1, ZFAND1, PAK1, SH3GLB1, GAS6, CHP1
PEPTIDE_METABOLIC_PROCESS	0.051	0.377571	IGF1, PAM, CPD, DNAJC1, CPEB2, PPA2, EIF4E3, EIF2AK4, CYFIP1, SPCS3, NFE2L2, DNAJC24, NCSTN, CPEB4, MRPL32, CNBP, XRN1, EIF3J
REGULATION_OF_PEPTIDE_SECRETION	0.0510511	0.377571	IGF1, PAM, BMP6, UNC13B, DNAJC1, CPT1A, CLOCK, SCAMP5, NR1D1, RAPGEF4, ADAM9, GAS6, JAK2, IFIH1, HMGN3, NDUFAF2, MDK, CD274, PRKCA, RAB11FIP5, LGR4, ITSN1, WNT5A, TIAM1
FATTY_ACID_METABOLIC_PROCESS	0.0512048	0.377571	PAM, ADIPOR1, AIG1, CPT1A, AUH, PON2, PLA2G4A, ETFDH, EPHX2, ALDH3A2
CELLULAR_MACROMOLECULE_LOCALIZATION	0.0519481	0.379221	RAPGEF2, MPP5, RDX, MYO6, RRAGD, SVIP, TXN, STOM, FBXW7, GOLGB1, USP46, TMEM59, SCARB2, PRKCI, RAB3D, CDKN1A, WIPI1, MESD, GOLGA4, LAMP3, SPCS3, SSR3, TBC1D12, LRP6, ICE1, FCHO2, SEC63, TRAM1, GNPTAB, SEL1L, PREPL, TTBK2, EPHX2, CLMN, BCL2, LZTFL1, TLK1, RAB6A, ZFAND1, TMEM107, GPHN, TM9SF3, PAK1, RTN4, F11R, OTUD7B, SH3GLB1, SSR1, SLMAP, RIC1, GAS6, CHP1, LIN7C, ETV5, RAB3B, TOMM70, KLHL21, PURA
POSITIVE_REGULATION_OF_PROTEIN_MODIFICATION_PROCESS	0.0529471	0.382687	IGF1, BMP6, RAPGEF2, INSR, HIPK2, YES1, MAP4K3, BMI1, IL6ST, TET1, BMPR2, MAP3K13, SVIP, TXN, FBXW7, NDFIP1, GPRC5D, CDKN1A, PJA2, ACVR2A, ACVR1, ACVR2B, IL12A, AKAP9, PRDM5, BMP8B, BCL2, DKK1, HGF, PELI1, RELL1, PAK1, DUSP26, NRG3, GADD45A, PFN2, FNIP2, ADAM9, GAS6, CHP1, JAK2, DDR2, CRY1
EXOCYTOSIS	0.0539461	0.386085	IGF1, ITGAV, CADPS2, UNC13B, FER, GYG1, CREG1, SVIP, STOM, RAB3D, PIK3C2A, CYFIP1, COMMD3, MLEC, SCAMP5, CCR2, SELENOP, NCSTN, PREPL, RAB6A, CYB5R1, HGF, PAK1, RAPGEF4, PFN2, GAS6, CHP1, SNX19, LIN7C, RAB3B
REGULATION_OF_PROTEIN_CONTAINING_COMPLEX_ASSEMBLY	0.0551102	0.390114	UNC13B, FER, RDX, CARMIL1, SVIP, CAMSAP2, JMY, CYFIP1, AKAP9, ICE1, KANK1, DKK1, PAK1, PFN2, SH3GLB1, FNIP2, LMO4
LIPID_METABOLIC_PROCESS	0.0559441	0.390114	ST3GAL6, PAM, BMP6, ADIPOR1, AIG1, MGST3, PIP5K1B, CPT1A, OSBP, AUH, FBXW7, ZBTB20, TMEM38B, PON2, TIPARP, TEX2, PIK3C2A, PLA2G4A, FAR2, FITM2, ALG8, KDSR, CAPN2, ETFDH, NCOA2, SPTLC1, SEL1L, EPHX2, CNBP, ALDH3A2, SUMF1, SLC44A1, NR1D1, CYB5R1, GFI1, PLCL1, DHCR7, FDX1, SRD5A3, APOL1, NEU3, GRHL1, LSR, GPD1L, INPP1, GK5, FAM126B, UGT2B17, TBXAS1, DOLK, RORA, KIT
REGULATION_OF_CYTOSKELETON_ORGANIZATION	0.0561122	0.390114	PAM, FER, ABL2, RDX, CARMIL1, CAMSAP2, JMY, CYFIP1, AKAP9, CAPN2, TTBK2, CFL2, STAG1, KANK1, RHOBTB3, PAK1, CCSAP, F11R, PFN2, CHMP4C
LEUKOCYTE_MEDIATED_IMMUNITY	0.0590591	0.394279	ITGAV, FER, GYG1, CREG1, SVIP, STOM, NDFIP1, RAB3D, CYFIP1, COMMD3, MLEC, IL12A, CCR2, NCSTN
SECRETION	0.0599401	0.394279	IGF1, ITGAV, CADPS2, PAM, BMP6, UNC13B, FER, MYO6, GYG1, CREG1, DNAJC1, SVIP, CPT1A, STOM, TMEM167A, TMEM38B, PRKCI, RAB3D, CLOCK, PIK3C2A, ACVR2B, CYFIP1, PLA2G4A, COMMD3, MLEC, SLC30A1, SCAMP5, CCR2, SELENOP, GNPTAB, SEL1L, NCSTN, PREPL, RAB6A, NR1D1, CYB5R1, HGF, PAK1, RAPGEF4, PFN2, ADAM9, GAS6, CHP1, SNX19, JAK2, LIN7C, CRY1, RAB3B, IFIH1, HMGN3, NDUFAF2, MDK, CD274, PRKCA, RAB11FIP5, KIT, L…
PROTEIN_TARGETING	0.062249	0.394279	STOM, FBXW7, SCARB2, PRKCI, SPCS3, SSR3, SEC63, TRAM1, GNPTAB, EPHX2, PAK1, SH3GLB1, SSR1, CHP1, TOMM70
PROTEIN_LOCALIZATION_TO_ORGANELLE	0.0629371	0.394279	RDX, TXN, FBXW7, GOLGB1, USP46, SCARB2, CDKN1A, LAMP3, SPCS3, SSR3, SEC63, TRAM1, GNPTAB, TTBK2, EPHX2, BCL2, LZTFL1, RAB6A, TMEM107, GPHN, RTN4, OTUD7B, SH3GLB1, CHP1, TOMM70, KLHL21
CELLULAR_RESPONSE_TO_PEPTIDE	0.0631263	0.394279	IGF1, INSR, FER, ADIPOR1, CPEB2, PRKCI, PIK3C2A, CYFIP1, KLF3, NFE2L2
REGULATION_OF_PROTEIN_CATABOLIC_PROCESS	0.0631263	0.394279	HIPK2, RDX, SVIP, ATRAID, FBXW7, NDFIP1, TIPARP, LAMP3, NFE2L2
POSITIVE_REGULATION_OF_TRANSMEMBRANE_TRANSPORT	0.0635246	0.394279	IGF1, INSR, PRKCI, NFE2L2, AKAP9, CCR2
VASCULAR_PROCESS_IN_CIRCULATORY_SYSTEM	0.0635246	0.394279	BMP6, YES1, BMPR2, PIK3C2A, ARHGAP42, EPHX2
ALCOHOL_METABOLIC_PROCESS	0.0643863	0.394279	IGF1, BMP6, MOXD1, SPTLC1, EPHX2, QDPR, CNBP, ALDH3A2, GFI1, PLCL1, DHCR7, FDX1, SRD5A3, APOL1, INPP1, GK5
REGULATION_OF_SUPRAMOLECULAR_FIBER_ORGANIZATION	0.0653924	0.394279	FER, RDX, CARMIL1, CAMSAP2, JMY, CYFIP1, AKAP9, TTBK2, CFL2, KANK1, PAK1, PFN2
BEHAVIOR	0.067	0.394279	OXR1, INSR, HIPK2, ABL2, ATXN1, CPT1A, USP46, PJA2, EIF2AK4, UBR3, CAPN2, NCOA2, SELENOP, NCSTN, BCL2, NR1D1, DKK1
POSITIVE_REGULATION_OF_DNA_BINDING_TRANSCRIPTION_FACTOR_ACTIVITY	0.0676768	0.394279	HIPK2, FER, MAP3K13, PRKCI, JMY, CLOCK, LRP6, MTDH
POSITIVE_REGULATION_OF_CELL_DIFFERENTIATION	0.0679321	0.394279	IGF1, BMP6, MAN2A1, NDNF, RAPGEF2, ABL2, IL6ST, CARMIL1, BMPR2, MAP3K13, ATRAID, SCARB2, PRKCI, ACVR2A, ACVR1, ACVR2B, GOLGA4, CYFIP1, NFE2L2, IL12A, CCR2, CAPN2, SUCO, BCL2, CYB5D2, PTCH2, DKK1, HGF, PAK1, F11R, JAG1, GAS6, JAK2, ETV5, DDR2, TMEM106B, MDK, STAT1, PRKCA, PARP6, KIT, CNTN1, ITSN1, WNT5A, TIAM1, IL6R, GRIP1, ITGA3, ZNF609, NFKBIZ, SYT1, ID2, PTGS2
CARBOHYDRATE_METABOLIC_PROCESS	0.068	0.394279	IGF1, ST3GAL6, MAN2A1, INSR, ADIPOR1, IL6ST, GYG1, CPT1A, ZBTB20, SCARB2, MLEC, GANAB, NCOA2, GNPTAB
RESPONSE_TO_BMP	0.0681587	0.394279	BMP6, HIPK2, BMPR2, ACVR2A, ACVR1, ACVR2B, SPART, DKK1, DDX5
RESPONSE_TO_ENDOGENOUS_STIMULUS	0.0689311	0.394279	IGF1, RBFOX2, PAM, BMP6, RAPGEF2, ZFYVE9, INSR, HIPK2, FER, ADIPOR1, YES1, RDX, BMPR2, RRAGD, CPEB2, TMEM38B, PRKCI, CDKN1A, ACVR2A, CLOCK, ACVR1, STAT4, PIK3C2A, ACVR2B, CYFIP1, KLF3, UBA5, NFE2L2, LRP6, AKAP9, CAPN2, NCOA2, NCSTN, CPEB4, KLF11, QDPR, XRN1, BCL2, NR1D1, SPART, FECH, KANK1, DKK1, PAK1, SESN1, DDX5, SORT1
PEPTIDYL_SERINE_MODIFICATION	0.0691383	0.394279	NDNF, HIPK2, MAP3K13, TXN, PRKCI, AKAP9, TTBK2, BCL2, TLK1, DKK1, HGF, PAK1, PLCL1, PFN2, FNIP2, GAS6, GPD1L, MAPKAPK3, MAPKAPK2, PRKCA
REGULATION_OF_EXOCYTOSIS	0.0696721	0.394279	CADPS2, UNC13B, FER, RAB3D, SCAMP5, CCR2, PREPL, RAPGEF4, PFN2, RAB3B
REGULATION_OF_CELL_DIFFERENTIATION	0.0699301	0.394279	IGF1, ITGAV, RBFOX2, BMP6, MAN2A1, NDNF, RAPGEF2, ADIPOR1, ABL2, IL6ST, CARMIL1, BMPR2, MAP3K13, ATRAID, CAMSAP2, FBXW7, NDFIP1, PTPRG, SMOC1, SCARB2, PRKCI, ACVR2A, CLOCK, ACVR1, EIF2AK4, ACVR2B, GOLGA4, CYFIP1, NFE2L2, IL12A, CCR2, CAPN2, PDLIM5, SUCO, CORO1C, IFRD1, BCL2, CYB5D2, PTCH2, NR1D1, SPART, KANK1, DKK1, HGF, PAK1, RTN4, GFI1, DDX5, SORT1, NRG3, F11R, JAG1, LMO4, GAS6, JAK2, ETV5, DDR…
REGULATION_OF_ORGANELLE_ORGANIZATION	0.0709291	0.394279	IGF1, PAM, INSR, FER, ABL2, RDX, CARMIL1, TET1, CAMSAP2, FBXW7, SCARB2, JMY, FAM162A, CYFIP1, TBC1D12, AKAP9, CAPN2, PRDM5, TTBK2, CFL2, XRN1, BCL2, TLK1, STAG1, KANK1, HGF, RHOBTB3, PAK1, GFI1, CCSAP, F11R, PFN2, SH3GLB1, FNIP2, CHMP4C
EPITHELIAL_CELL_DEVELOPMENT	0.0709812	0.394279	BMP6, RAPGEF2, RDX, CDKN1A, CLOCK
EPITHELIAL_CELL_DIFFERENTIATION	0.0711423	0.394279	BMP6, RAPGEF2, RDX, BMPR2, CPT1A, PKP4, TMEM38B, CDKN1A, CLOCK, ACVR1, ACVR2B
POSITIVE_REGULATION_OF_NEURON_DIFFERENTIATION	0.0720721	0.394279	BMP6, NDNF, RAPGEF2, ABL2, BMPR2, MAP3K13, SCARB2, PRKCI, GOLGA4, CYFIP1, NFE2L2, BCL2, CYB5D2, DKK1, HGF, PAK1, ETV5, TMEM106B, MDK, PARP6, CNTN1, ITSN1, WNT5A, TIAM1, GRIP1, ITGA3
MONOSACCHARIDE_METABOLIC_PROCESS	0.0727273	0.394279	IGF1, MAN2A1, INSR, ADIPOR1, CPT1A
RESPONSE_TO_NITROGEN_COMPOUND	0.0729271	0.394279	IGF1, RAPGEF2, INSR, FER, ADIPOR1, MGST3, RRAGD, SVIP, CPEB2, TMEM38B, PRKCI, CDKN1A, STAT4, PIK3C2A, STT3B, CYFIP1, KLF3, NFE2L2, LRP6, AKAP9, CAPN2, SEL1L, NCSTN, CPEB4, KLF11, QDPR, XRN1, UBXN4, KANK1, PELI1, PAK1, SESN1, SORT1, JAG1, FDX1, JAK2, CRY1, NDUFS4
POSITIVE_REGULATION_OF_TRANSCRIPTION_BY_RNA_POLYMERASE_II	0.0729271	0.394279	IGF1, BMP6, HIPK2, YES1, MYO6, TET1, BMPR2, FBXW7, ACVR2A, CLOCK, ACVR1, STAT4, NFE2L2, LRP6, SLC40A1, NCOA2, CNBP, ZBTB38, NR1D1, HGF, ARID3B, GFI1, BCL9, KAT6B, ITGA8, JAG1, LMO4, ETV5, TAF4B, ETV6, GRHL1, ATF6, HMGN3, KLF13, STAT1, ESRRG, SMARCA5, RORA, IRF1, WNT5A, ESR1, CDC73, PKD2, ADRB2, ZNF609, RAF1
POSITIVE_REGULATION_OF_NEURON_PROJECTION_DEVELOPMENT	0.0731463	0.394279	NDNF, RAPGEF2, ABL2, BMPR2, MAP3K13, SCARB2, PRKCI, GOLGA4, CYFIP1, NFE2L2, HGF, PAK1, TMEM106B, MDK, PARP6, CNTN1, ITSN1, WNT5A, TIAM1, GRIP1, ITGA3, SYT1
LOCOMOTION	0.0739261	0.394279	IGF1, ITGAV, RBFOX2, NDNF, RAPGEF2, INSR, FER, ADIPOR1, YES1, LAMC1, ABL2, RDX, CARMIL1, BMPR2, DST, FBXW7, PTPRG, PRKCI, JMY, ACVR1, PIK3C2A, CYFIP1, C5orf30, NFE2L2, MCC, IL12A, CCR2, CORO1C, TTBK2, NAV1, BCL2, KANK1, HGF, RHOBTB3, PAK1, RTN4, CCSAP, NRG3, F11R, CFAP44, ARMC2, PFN2, JAG1, LMO4, ADAM9, CHMP4C, GAS6, JAK2, TNS3, DDR2
POSITIVE_REGULATION_OF_MOLECULAR_FUNCTION	0.0739261	0.394279	IGF1, RAPGEF2, INSR, HIPK2, FER, ARHGAP5, MAP4K3, BMI1, ABL2, DNAJC1, MAP3K13, TXN, PKP4, FBXW7, GPRC5D, PRKCI, CDKN1A, JMY, CLOCK, FAM162A, FAM13A, ACVR2B, ARHGAP42, TBC1D12, LRP6, AKAP9, CCR2, DNAJC24, MTDH, NCSTN, CORO1C, ARHGEF12, BCL2, SNX18, DKK1, HGF, PAK1, NRG3, F11R, PLCL1, GADD45A, PFN2, LMO4, ADAM9, RIC1, GAS6, CHP1, DENND1B, JAK2, DDR2, MAPKAPK3, MAPKAPK2, PERP, TBC1D30, ARHGAP32, PAR…
PROTEASOMAL_PROTEIN_CATABOLIC_PROCESS	0.0741483	0.394279	SVIP, FBXW7, CLOCK, STT3B, LAMP3, NFE2L2, UBR3, SEL1L, FAM122A, UBXN4, NR1D1, PELI1
POSITIVE_REGULATION_OF_EPITHELIAL_CELL_PROLIFERATION	0.0742268	0.394279	IGF1, BMP6, LAMC1, BMPR2
RESPONSE_TO_ENDOPLASMIC_RETICULUM_STRESS	0.0744467	0.394279	SVIP, WIPI1, EIF2AK4, STT3B, UBA5, NFE2L2, TMCO1, SCAMP5, SEL1L, BCL2, UBXN4, EXTL2
REGULATION_OF_SECRETION	0.0749251	0.394279	IGF1, CADPS2, PAM, BMP6, UNC13B, FER, MYO6, DNAJC1, CPT1A, RAB3D, CLOCK, SLC30A1, SCAMP5, CCR2, PREPL, NR1D1, RAPGEF4, PFN2, ADAM9, GAS6, JAK2, CRY1, RAB3B, IFIH1, HMGN3, NDUFAF2, MDK, CD274, PRKCA, RAB11FIP5, LGR4, ITSN1, WNT5A, TIAM1
ORGANIC_HYDROXY_COMPOUND_METABOLIC_PROCESS	0.0750751	0.394279	IGF1, BMP6, RAPGEF2, OSBP, MOXD1, SPTLC1, EPHX2, QDPR, CNBP, ALDH3A2, BCL2, NR1D1, CYB5R1, GFI1, PLCL1, DHCR7, FDX1, SRD5A3, APOL1
REGULATION_OF_CELLULAR_PROTEIN_CATABOLIC_PROCESS	0.0766902	0.398182	HIPK2, RDX, SVIP, ATRAID, FBXW7, LAMP3, NFE2L2
REGULATION_OF_NEURON_DIFFERENTIATION	0.0769231	0.398182	BMP6, NDNF, RAPGEF2, ABL2, BMPR2, MAP3K13, CAMSAP2, PTPRG, SCARB2, PRKCI, EIF2AK4, GOLGA4, CYFIP1, NFE2L2, PDLIM5, IFRD1, BCL2, CYB5D2, SPART, KANK1, DKK1, HGF, PAK1, RTN4, GFI1
NEGATIVE_REGULATION_OF_CELL_DEATH	0.0779221	0.398182	IGF1, ITGAV, OXR1, NDNF, HIPK2, NAA35, IL6ST, CAST, TXN, PRKCI, CDKN1A, ACVR1, LAMP3, NFE2L2, LRP6, SLC40A1, MTDH, CPEB4, AVEN, BCL2, DKK1, HGF, PELI1
NEGATIVE_REGULATION_OF_TRANSCRIPTION_BY_RNA_POLYMERASE_II	0.078	0.398182	BMP6, HIPK2, BMI1, ATXN1, TXN, NFIL3, ZBTB20, ACVR2B, KLF3, USP3, NCOA2, MTDH, PRDM5, KLF11, CNBP, NR1D1, DKK1, DUSP26, GFI1, DDX5, OTUD7B, BRMS1L, FNIP2, NFE2L3, CRY1, PURA, ETV6, FOXP2, STAT1
REGULATION_OF_PEPTIDYL_SERINE_PHOSPHORYLATION	0.0793319	0.402169	TXN, AKAP9, BCL2, DKK1, HGF, PAK1, PLCL1, PFN2, FNIP2, GAS6, GPD1L, WNT5A, RAF1, PTGS2
POSITIVE_REGULATION_OF_CELL_DEVELOPMENT	0.081	0.406804	IGF1, BMP6, MAN2A1, NDNF, RAPGEF2, ABL2, IL6ST, CARMIL1, BMPR2, MAP3K13, SCARB2, PRKCI, GOLGA4, CYFIP1, NFE2L2, CCR2, BCL2, CYB5D2, DKK1, HGF, PAK1
POSITIVE_REGULATION_OF_PHOSPHORUS_METABOLIC_PROCESS	0.0819181	0.406804	IGF1, BMP6, RAPGEF2, INSR, HIPK2, YES1, MAP4K3, IL6ST, BMPR2, MAP3K13, TXN, FBXW7, ZBTB20, GPRC5D, CDKN1A, PJA2, ACVR2A, ACVR1, ACVR2B, IL12A, AKAP9, CAPN2, BMP8B, BCL2, DKK1, HGF, RELL1, PAK1, DUSP26, NRG3, GADD45A, PFN2, FNIP2, LMO4, ADAM9, GAS6, JAK2, DDR2
REGULATION_OF_NERVOUS_SYSTEM_DEVELOPMENT	0.0819181	0.406804	BMP6, LRRN1, MAN2A1, NDNF, RAPGEF2, ABL2, IL6ST, BMPR2, MAP3K13, CAMSAP2, PTPRG, SCARB2, PRKCI, EIF2AK4, GOLGA4, CYFIP1, NFE2L2, CCR2, PDLIM5, IFRD1, BCL2, CYB5D2, NR1D1, SPART, KANK1, DKK1, HGF, PAK1, RTN4, GFI1, NRG3
POSITIVE_REGULATION_OF_PROTEIN_METABOLIC_PROCESS	0.0839161	0.407246	IGF1, BMP6, RAPGEF2, INSR, HIPK2, YES1, MAP4K3, BMI1, RDX, IL6ST, TET1, BMPR2, MAP3K13, SVIP, TXN, FBXW7, NDFIP1, GPRC5D, CDKN1A, PJA2, ACVR2A, TIPARP, ACVR1, FAM162A, EIF2AK4, ACVR2B, NFE2L2, IL12A, AKAP9, CCR2, PRDM5, NCSTN, BMP8B, CNBP, FAM122A, BCL2, DKK1, HGF, PELI1, CNPY2, RELL1, PAK1, DUSP26, NRG3, GADD45A, PFN2, FNIP2, ADAM9, GAS6, CHP1, JAK2, DDR2, CRY1
PROTEOLYSIS	0.0849151	0.407246	HIPK2, RNF148, CPD, RNF133, DNAJC1, SVIP, CAST, FBXW7, NDFIP1, USP46, TMEM59, RNF11, PGPEP1, CTSO, CLOCK, FAM162A, STT3B, LAMP3, SPCS3, NFE2L2, UBR3, USP3, CAPN2, SEL1L, NCSTN, PREPL, FAM122A, UBXN4, NR1D1, HGF, PELI1, OTUD7B, ADAM9, CHMP4C, GAS6, MINDY2, JAK2
POSITIVE_REGULATION_OF_CELL_POPULATION_PROLIFERATION	0.0849151	0.407246	IGF1, ITGAV, BMP6, INSR, HIPK2, FER, LAMC1, BMI1, IL6ST, TET1, BMPR2, PRKCI, CDKN1A, IL12A, CCR2, FAM98A, CNBP, BCL2, PELI1, PAK1, RTN4, SSR1, GAS6, JAK2, TNS3, ETV5, DDR2, NDUFS4, S100A6, PURA, CALCRL, IL5RA, FOXP2, TSHR, MDK, CD274, STAT1, PRKCA, SELENON, KIT, WNT5A, ESR1, TIAM1, IL6R
CELL_GROWTH	0.0850851	0.407246	IGF1, ADIPOR1, BMPR2, MAP3K13, CDKN1A, EIF2AK4, GOLGA4, CYFIP1, PDLIM5, IFRD1, FAM122A, BCL2, PTCH2, SPART, PAK1, RTN4, NRG3
VESICLE_ORGANIZATION	0.0855131	0.407246	UNC13B, SCARB2, PRKCI, TFG, CORO1C, TMCC1, MCFD2, BCL2, TMEM127, SORT1, CHMP4C, SNX19, KLHL21
REGULATION_OF_ANATOMICAL_STRUCTURE_SIZE	0.086	0.407246	FER, RDX, CARMIL1, BMPR2, MAP3K13, JMY, PIK3C2A, GOLGA4, CYFIP1, ARHGAP42, DEPTOR, IFRD1, EPHX2, CFL2, SPART, KANK1, PAK1, RTN4, PFN2, LRRC8A, RAB3B
INTERACTION_WITH_HOST	0.0864198	0.407246	ITGAV, INSR, HIPK2, SCARB2, EIF2AK4, F11R, XPR1, CHMP4C, GAS6
REGULATION_OF_PEPTIDYL_TYROSINE_PHOSPHORYLATION	0.08647	0.407246	IGF1, BMP6, YES1, IL6ST, FBXW7, ACVR1, IL12A
IN_UTERO_EMBRYONIC_DEVELOPMENT	0.0877901	0.410792	IGF1, MAN2A1, TET1, ACVR1, SLC30A1, UBR3, CAPN2, RTN4, OTUD7B
REGULATION_OF_TRANSPORT	0.0889111	0.410792	IGF1, ITGAV, CADPS2, PAM, BMP6, UNC13B, INSR, FER, YES1, ABL2, RDX, MYO6, DNAJC1, SVIP, CPT1A, TXN, STOM, FBXW7, NDFIP1, TMEM38B, USP46, PRKCI, RAB3D, CLOCK, CYFIP1, NFE2L2, SLC30A1, AKAP9, SCAMP5, CCR2, ICE1, SLC31A2, PREPL, BCL2, ZFAND1, NR1D1, DKK1, PAK1, RAPGEF4, PFN2, SH3GLB1, SLMAP, ADAM9, GAS6, CHP1, JAK2, CRY1, RAB3B, IFIH1, HMGN3, NDUFAF2, GPD1L
POSITIVE_REGULATION_OF_CATALYTIC_ACTIVITY	0.0889111	0.410792	IGF1, RAPGEF2, INSR, ARHGAP5, MAP4K3, BMI1, ABL2, DNAJC1, MAP3K13, TXN, PKP4, FBXW7, GPRC5D, CDKN1A, FAM162A, FAM13A, ACVR2B, ARHGAP42, TBC1D12, DNAJC24, NCSTN, CORO1C, ARHGEF12, BCL2, SNX18, DKK1, HGF, PAK1, NRG3, F11R, GADD45A, PFN2, LMO4, ADAM9, RIC1, GAS6, DENND1B, JAK2, DDR2, MAPKAPK3, MAPKAPK2, PERP, TBC1D30, ARHGAP32, PARP6, KIT, ITSN1, WNT5A, ESR1, TIAM1, IL6R, RALGAPA1, AVPI1, C6orf89, P…
ENDOCYTOSIS	0.0901804	0.414036	ZFYVE9, INSR, ABL2, MYO6, CARMIL1, USP46, SCARB2, PIK3C2A, LRP6, SCAMP5, EHBP1, FCHO2, SNX18, DKK1, RHOBTB3, SORT1, DENND1B, APOL1, CALCRL, MAPKAPK3, MAPKAPK2
REGULATION_OF_CELL_MORPHOGENESIS	0.091	0.415187	RAPGEF2, RDX, CARMIL1, BMPR2, MAP3K13, GOLGA4, CYFIP1, FITM2, PDLIM5, CORO1C, IFRD1, SPART, KANK1, RHOBTB3, PAK1, RTN4, F11R, FGD4, MDK, PARP6, KIT, WNT5A, TIAM1, RND3, GRIP1, SYT1, SPARC, SRC, ARHGAP18, ADAM10
EMBRYO_DEVELOPMENT_ENDING_IN_BIRTH_OR_EGG_HATCHING	0.0920921	0.41756	IGF1, MAN2A1, TET1, BMPR2, KIAA1217, ACVR2A, ACVR1, LRP6, SLC30A1, UBR3, CAPN2, TMEM107, DKK1, RTN4, OTUD7B, LMO4
PROTEIN_LOCALIZATION_TO_PLASMA_MEMBRANE	0.0931864	0.418583	RAPGEF2, MPP5, RDX, TMEM59, PRKCI, RAB3D, GOLGA4, LRP6, FCHO2, PREPL, F11R, SLMAP, GAS6, RAB3B
POSITIVE_REGULATION_OF_SIGNALING	0.0949051	0.418583	IGF1, MLLT3, BMP6, RAPGEF2, UNC13B, INSR, HIPK2, ADIPOR1, MAP4K3, IL6ST, BMPR2, RRAGD, MAP3K13, TXN, FBXW7, NDFIP1, PRKCI, PJA2, ACVR2A, TFG, ACVR1, FAM162A, EIF2AK4, ACVR2B, CYFIP1, GOLT1B, IL12A, CCR2, MTDH, NCSTN, BMP8B, BCL2, KANK1, DKK1, HGF, PELI1, RELL1, PAK1, RTN4, GFI1, DDX5, F11R, GADD45A, ITGA8, JAG1, ADAM9, GAS6, JAK2
DIVALENT_INORGANIC_CATION_HOMEOSTASIS	0.0962889	0.418583	TMTC2, ITGAV, ABL2, TMEM38B, SLC39A8, RMDN3, LRP6, TMCO1, SLC30A1, CCR2, EPHX2, BCL2
REGULATION_OF_CARBOHYDRATE_METABOLIC_PROCESS	0.0967078	0.418583	IGF1, INSR, ADIPOR1, ZBTB20, SCARB2, NCOA2, NR1D1
CELLULAR_ION_HOMEOSTASIS	0.0970971	0.418583	ITGAV, BMP6, ABL2, NDFIP1, TMEM38B, SLC39A8, RMDN3, LRP6, TMCO1, SLC30A1, SLC40A1, CCR2, SLC31A2, EPHX2, BCL2, PLCL1, XPR1, CHP1, JAK2
REGULATION_OF_PROTEIN_STABILITY	0.0975855	0.418583	IGF1, FBXW7, CRTAP, CDKN1A, USP3, SEL1L, BCL2, NR1D1, RTN4, PFN2, SH3GLB1, CHP1
CELL_JUNCTION_ASSEMBLY	0.0978809	0.418583	RAPGEF2, LAMC1, MPP5, PKP4, DST, PRKCI, MTDH, CORO1C, BCL2
STEROID_METABOLIC_PROCESS	0.0985915	0.418583	BMP6, OSBP, TIPARP, EPHX2, CNBP, NR1D1, CYB5R1, GFI1, DHCR7, FDX1, SRD5A3, APOL1, UGT2B17, RORA, KIT, ESR1
ENZYME_LINKED_RECEPTOR_PROTEIN_SIGNALING_PATHWAY	0.0989011	0.418583	IGF1, ITGAV, RBFOX2, BMP6, RAPGEF2, ZFYVE9, INSR, HIPK2, FER, ADIPOR1, YES1, IL6ST, BMPR2, FBXW7, PTPRG, ACVR2A, TIPARP, ACVR1, PIK3C2A, ACVR2B, CYFIP1, NCSTN, BMP8B, SPART, KANK1, DKK1, HGF, PAK1, RTN4, DDX5, SORT1, NRG3, F11R, ITGA8, ADAM9, GAS6, JAK2, DDR2
REGULATION_OF_CELLULAR_PROTEIN_LOCALIZATION	0.0991984	0.418583	RDX, SVIP, TXN, STOM, FBXW7, USP46, TMEM59, PRKCI, MESD, ICE1, TTBK2, BCL2, LZTFL1, ZFAND1, PAK1, RTN4, OTUD7B, SH3GLB1, GAS6, CHP1
REGULATION_OF_HORMONE_LEVELS	0.0991984	0.418583	BMP6, CPT1A, TIPARP, CLOCK, ACVR2B, NR1D1, GFI1, RAPGEF4, DHCR7, FDX1, SRD5A3, SNX19, JAK2, CRY1, HMGN3, NDUFAF2, PRKCA, RAB11FIP5, ITSN1, ESR1, TIAM1
REGULATION_OF_CELL_CELL_ADHESION	0.0991984	0.418583	IGF1, BMP6, YES1, RDX, IL6ST, NDFIP1, IL12A, CCR2, PELI1, PAK1, F11R, JAG1, JAK2, MDK, CD274, PRKCA, IRF1, WNT5A, FXYD5
REGULATION_OF_CELL_ACTIVATION	0.1001	0.41996	IGF1, FER, YES1, IL6ST, NDFIP1, CDKN1A, PJA2, IL12A, CCR2, BCL2, NR1D1, PELI1, PAK1, F11R, LMO4, GAS6, JAK2, MDK, CD274, PRKCA, RORA, IRF1, WNT5A
POSITIVE_REGULATION_OF_NERVOUS_SYSTEM_DEVELOPMENT	0.101898	0.420898	BMP6, LRRN1, MAN2A1, NDNF, RAPGEF2, ABL2, IL6ST, BMPR2, MAP3K13, SCARB2, PRKCI, GOLGA4, CYFIP1, NFE2L2, CCR2, BCL2, CYB5D2, DKK1, HGF, PAK1, ETV5, TMEM106B, MDK, PARP6, KIT, CNTN1, ITSN1, WNT5A, TIAM1, GRIP1, ITGA3, PARD3, ZNF609, SYT1, ID2
IMPORT_INTO_CELL	0.102	0.420898	ZFYVE9, INSR, ABL2, MYO6, CARMIL1, USP46, SCARB2, SLC39A8, PIK3C2A, LRP6, SLC30A1, SCAMP5, EHBP1, FCHO2, SNX18, DKK1, RHOBTB3, SORT1, DENND1B, APOL1, RAB3B, CALCRL, MAPKAPK3, MAPKAPK2
NEGATIVE_REGULATION_OF_NERVOUS_SYSTEM_DEVELOPMENT	0.102204	0.420898	RAPGEF2, PTPRG, EIF2AK4, IFRD1, NR1D1, SPART, KANK1, DKK1, RTN4, GFI1, NRG3, JAG1
PROTEIN_POLYMERIZATION	0.103061	0.420898	FER, RDX, CARMIL1, CAMSAP2, JMY, CYFIP1, AKAP9, KANK1, PAK1, PFN2, JAK2
PROTEIN_LOCALIZATION_TO_CELL_PERIPHERY	0.103206	0.420898	RAPGEF2, MPP5, RDX, TMEM59, PRKCI, RAB3D, GOLGA4, LRP6, FCHO2, PREPL, LZTFL1, GPHN, F11R, SLMAP, GAS6, LIN7C, RAB3B
REGULATION_OF_CELL_ADHESION	0.106	0.429889	IGF1, ITGAV, BMP6, NDNF, YES1, ABL2, RDX, IL6ST, CARMIL1, PKP4, NDFIP1, IL12A, CCR2, CORO1C, BCL2, KANK1, PELI1, PAK1, DUSP26, F11R, JAG1, ADAM9, JAK2, MDK, CD274, PRKCA, CDKN2A, IRF1, WNT5A, FXYD5, FMN1
POSITIVE_REGULATION_OF_CELL_PROJECTION_ORGANIZATION	0.107107	0.430108	NDNF, RAPGEF2, ABL2, CARMIL1, BMPR2, MAP3K13, SCARB2, PRKCI, GOLGA4, CYFIP1, NFE2L2, FAM98A, CORO1C, HGF, PAK1, TMEM106B, MDK, PARP6, KIT, CNTN1, ITSN1, WNT5A, TIAM1, GRIP1, ITGA3, SYT1, SRC, NCKAP1
INFLAMMATORY_RESPONSE	0.108108	0.430108	IGF1, BMP6, IL6ST, NDFIP1, PJA2, CLOCK, ACVR1, C5orf30, NFE2L2, CCR2, TBC1D23, EPHX2, NR1D1, HGF, F11R, JAK2, CALCRL, IL5RA, MAPKAPK2, MDK, RORA, KIT, WNT5A, ESR1, IL6R
NEGATIVE_REGULATION_OF_NEURON_DEATH	0.108559	0.430108	OXR1, NDNF, HIPK2, PRKCI, CPEB4, BCL2, JAK2, MDK, ITSN1
POSITIVE_REGULATION_OF_TRANSPORT	0.108891	0.430108	IGF1, ITGAV, CADPS2, BMP6, UNC13B, INSR, RDX, STOM, FBXW7, PRKCI, RAB3D, NFE2L2, AKAP9, SCAMP5, CCR2, ICE1, BCL2, ZFAND1, PAK1, SH3GLB1, ADAM9, GAS6, CHP1, JAK2, RAB3B, IFIH1, GPD1L, MDK, CD274
OSSIFICATION	0.109	0.430108	IGF1, BMP6, IL6ST, BMPR2, ATRAID, TMEM38B, SMOC1, ACVR2A, ACVR1, TUFT1, ACVR2B, SUCO, BMP8B, BCL2, DKK1, HGF, DDX5, SORT1, RRBP1, JAG1
POSITIVE_REGULATION_OF_PROTEIN_CONTAINING_COMPLEX_ASSEMBLY	0.110885	0.433749	UNC13B, FER, CARMIL1, JMY, CYFIP1, AKAP9, ICE1, PAK1, PFN2, SH3GLB1, FNIP2
NEGATIVE_REGULATION_OF_CELL_GROWTH	0.111111	0.433749	ADIPOR1, BMPR2, CDKN1A, IFRD1, BCL2, SPART, PAK1, RTN4
NEURON_PROJECTION_EXTENSION	0.113402	0.437374	BMPR2, MAP3K13, EIF2AK4, GOLGA4, CYFIP1, IFRD1, PAK1, RTN4
MYELOID_LEUKOCYTE_ACTIVATION	0.114228	0.437374	ITGAV, FER, GYG1, CREG1, SVIP, STOM, RAB3D, PJA2, CYFIP1, COMMD3, MLEC, CCR2, NCSTN, RAB6A, NR1D1, ADAM9, JAK2, NDRG1, RORA, KIT, NDUFC2, GGH, WNT5A, TMEM179B
REGULATION_OF_LEUKOCYTE_PROLIFERATION	0.114754	0.437374	IGF1, IL6ST, NDFIP1, CDKN1A, IL12A, CCR2, BCL2, PELI1
NEGATIVE_REGULATION_OF_NEURON_DIFFERENTIATION	0.114954	0.437374	RAPGEF2, PTPRG, EIF2AK4, IFRD1, SPART, KANK1, DKK1, RTN4, GFI1, JAG1
LIPID_MODIFICATION	0.115035	0.437374	ADIPOR1, PIP5K1B, CPT1A, AUH, PIK3C2A, ETFDH, EPHX2, ALDH3A2
GLYCOSYLATION	0.118236	0.447216	TMTC2, ST3GAL6, MAN2A1, TET1, MAN1A2, TMEM59, STT3B, ALG8, MCFD2, EXTL2, CHP1, SRD5A3
LEUKOCYTE_PROLIFERATION	0.120081	0.45185	IGF1, IL6ST, NDFIP1, CDKN1A, IL12A, CCR2, NCSTN, BCL2, PELI1, PURA, IL5RA, CD274, KIT, IRF1
CELL_ACTIVATION	0.121878	0.453032	IGF1, ITGAV, FER, YES1, IL6ST, GYG1, CREG1, SVIP, STOM, NDFIP1, RAB3D, CDKN1A, PJA2, EIF2AK4, CYFIP1, COMMD3, MLEC, IL12A, CCR2, NCSTN, BCL2, RAB6A, NR1D1, PELI1, PAK1, F11R, LMO4, ADAM9, GAS6, LRRC8A, JAK2, PURA, NDRG1, MDK, CSRP1, CD274, PRKCA, RORA, KIT, IRF1, NDUFC2, GGH, WNT5A, TMEM179B
ERK1_AND_ERK2_CASCADE	0.122428	0.453032	IGF1, ITGAV, RAPGEF2, FBXW7
SIGNAL_TRANSDUCTION_BY_P53_CLASS_MEDIATOR	0.122449	0.453032	HIPK2, MYO6, CDKN1A, JMY, BCL2, DDX5, GADD45A, TAF4B, NDRG1, PERP, PCBP4
POSITIVE_REGULATION_OF_DEVELOPMENTAL_PROCESS	0.122877	0.453032	IGF1, BMP6, LRRN1, MAN2A1, NDNF, RAPGEF2, INSR, HIPK2, ABL2, IL6ST, CARMIL1, BMPR2, MAP3K13, ATRAID, SCARB2, PRKCI, ACVR2A, ACVR1, PIK3C2A, ACVR2B, GOLGA4, CYFIP1, NFE2L2, IL12A, CCR2, CAPN2, SUCO, MTDH, CORO1C, BCL2, CYB5D2, PTCH2, DKK1, HGF, PAK1, RTN4, F11R, JAG1, ADAM9, GAS6, JAK2, ETV5, DDR2, TMEM106B, FOXP2, MDK, CD274, STAT1, PRKCA, PARP6, KIT, LGR4, CNTN1, CDKN2A, ITSN1, WNT5A, TIAM1, IL6…
GASTRULATION	0.124117	0.454892	ITGAV, BMPR2, ACVR2A, ACVR1, ACVR2B, LRP6
REGULATION_OF_HEMOPOIESIS	0.125755	0.454892	RBFOX2, FBXW7, NDFIP1, ACVR2A, NFE2L2, IL12A, CCR2, JAG1, GAS6, KLF13, MDK, STAT1, PRXL2A, PRKCA, IRF1, CDC73, NFKBIZ, ID2
NEGATIVE_REGULATION_OF_CELL_PROJECTION_ORGANIZATION	0.125773	0.454892	RAPGEF2, PTPRG, IFRD1, SPART, KANK1, DKK1, RTN4, GFI1, PFN2, TBC1D30, WNT5A, ITGA3
CYTOKINE_PRODUCTION	0.125874	0.454892	IGF1, ITGAV, IL6ST, ZBTB20, NDFIP1, C5orf30, IL12A, SCAMP5, CCR2, CAPN2, TBC1D23, HGF, PELI1, F11R, OTUD7B, GAS6, DENND1B, JAK2, IFIH1, IL5RA, MAPKAPK2, MDK, CD274, STAT1, LTBP1, RORA, KIT, LGR4, IRF1, WNT5A, IL6R
NEGATIVE_REGULATION_OF_RNA_BIOSYNTHETIC_PROCESS	0.126873	0.456243	RBFOX2, BMP6, HIPK2, BMI1, ATXN1, CREG1, TET1, TXN, NFIL3, ZBTB20, CLOCK, ACVR2B, KLF3, USP3, NCOA2, MTDH, PRDM5, KLF11, CNBP, ZBTB38, RIOX2, NR1D1, DKK1, DUSP26, GFI1, DDX5, OTUD7B, KAT6B, BRMS1L, FNIP2, GAS6, NFE2L3, CRY1, PURA, ETV6, FOXP2, STAT1, ZNF706, SMARCA5, LGR4, CDKN2A, IRF1, WNT5A, ESR1, EID1, CDC73
RESPONSE_TO_GROWTH_FACTOR	0.127872	0.457582	RBFOX2, BMP6, RAPGEF2, ZFYVE9, INSR, HIPK2, FER, YES1, RDX, BMPR2, ACVR2A, ACVR1, ACVR2B, CYFIP1
PHAGOCYTOSIS	0.129098	0.459716	ITGAV, YES1, MESD, CYFIP1, CORO1C, RHOBTB3, PAK1, GAS6, CD302
CELL_CELL_JUNCTION_ORGANIZATION	0.129779	0.459895	BMP6, MPP5, RDX, RASSF8, PKP4, PRKCI, MTDH, F11R, GRHL1, LSR, PERP, PRKCA
NEURON_DEATH	0.13253	0.4642	OXR1, NDNF, HIPK2, FBXW7, PRKCI, FAM162A, CAPN2, NCSTN, CPEB4, BCL2, DKK1, CHP1, JAK2
INTERSPECIES_INTERACTION_BETWEEN_ORGANISMS	0.132867	0.4642	ITGAV, INSR, HIPK2, IL6ST, STOM, FBXW7, SCARB2, EIF2AK4, LAMP3, SPCS3, NFE2L2, CCR2, TRAM1, BCL2, RAB6A, GFI1, DDX5, F11R, XPR1, MAGI3, CHMP4C, GAS6, APOL1
APOPTOTIC_SIGNALING_PATHWAY	0.133267	0.4642	IGF1, ITGAV, HIPK2, FBXW7, CDKN1A, JMY, ACVR1, FAM162A, NFE2L2, IL12A, DEPTOR, BCL2, HGF, DDX5, SORT1, FNIP2, JAK2
POSITIVE_REGULATION_OF_KINASE_ACTIVITY	0.133866	0.4642	IGF1, RAPGEF2, INSR, MAP4K3, MAP3K13, TXN, FBXW7, GPRC5D, CDKN1A, ACVR2B, DKK1, HGF, PAK1, NRG3, GADD45A, LMO4, ADAM9, GAS6, JAK2, DDR2, MAPKAPK3, MAPKAPK2, PARP6, KIT, ITSN1, WNT5A, TIAM1, IL6R, AVPI1, PKD2, ADRB2, RAF1, CCND1
POSITIVE_REGULATION_OF_ORGANELLE_ORGANIZATION	0.134269	0.4642	IGF1, INSR, FER, CARMIL1, TET1, FBXW7, JMY, FAM162A, CYFIP1, AKAP9, PRDM5, CFL2, BCL2, PAK1, PFN2, SH3GLB1
REGULATION_OF_APOPTOTIC_SIGNALING_PATHWAY	0.134809	0.4642	IGF1, ITGAV, FBXW7, ACVR1, FAM162A, NFE2L2, DEPTOR, BCL2, HGF
REGULATION_OF_DEFENSE_RESPONSE	0.136	0.466103	IGF1, UNC13B, IL6ST, NDFIP1, PJA2, CLOCK, EIF2AK4, C5orf30, IL12A, CCR2, TBC1D23, NR1D1, HGF, PELI1, PAK1, RTN4, GFI1, JAK2, CALCRL, IFIH1, MAPKAPK3, MAPKAPK2, MDK, STAT1, RORA, LGR4, IRF1, WNT5A, ESR1, RAF1, NFKBIZ, PTGS2, SRC, ELMOD2
REGULATION_OF_CELLULAR_COMPONENT_MOVEMENT	0.137862	0.469497	IGF1, ITGAV, RAPGEF2, INSR, FER, ADIPOR1, ABL2, RDX, CARMIL1, BMPR2, FBXW7, PTPRG, ACVR1, PIK3C2A, C5orf30, NFE2L2, MCC, IL12A, AKAP9, CCR2, CORO1C, TTBK2, BCL2, KANK1, HGF, PAK1, RTN4, CCSAP, NRG3, PFN2, JAG1, LMO4, ADAM9, GAS6, JAK2, DDR2
REGULATION_OF_ACTIN_FILAMENT_BASED_PROCESS	0.138277	0.469497	PAM, FER, ABL2, RDX, CARMIL1, JMY, CYFIP1, AKAP9, CFL2, KANK1, RHOBTB3, PAK1, F11R, PFN2
RESPIRATORY_SYSTEM_DEVELOPMENT	0.140845	0.476004	MAN2A1, MAN1A2, BMPR2, FBXW7, TMEM38B, ACVR2B, LRP6
RESPONSE_TO_OXYGEN_LEVELS	0.14257	0.478874	PAM, NDNF, HIPK2, CPEB2, CDKN1A, FAM162A, NFE2L2, CAPN2, CPEB4, BCL2, PAK1
INOSITOL_LIPID_MEDIATED_SIGNALING	0.143006	0.478874	IGF1, INSR, PIP5K1B, PIK3C2A, HGF, PLCL1, JAK2
INTRACELLULAR_PROTEIN_TRANSPORT	0.144855	0.48285	MYO6, SVIP, TXN, STOM, FBXW7, SCARB2, PRKCI, RAB3D, CDKN1A, SPCS3, SSR3, TBC1D12, ICE1, SEC63, TRAM1, GNPTAB, SEL1L, EPHX2, TLK1, RAB6A, ZFAND1, PAK1, SH3GLB1, SSR1, RIC1, GAS6, CHP1, RAB3B, TOMM70, PURA
REGULATION_OF_TRANSMEMBRANE_RECEPTOR_PROTEIN_SERINE_THREONINE_KINASE_SIGNALING_PATHWAY	0.146317	0.485506	BMP6, HIPK2, BMPR2, ACVR2A, ACVR1, ACVR2B, BMP8B, SPART, DKK1, ITGA8
SKELETAL_SYSTEM_DEVELOPMENT	0.147	0.485566	IGF1, BMP6, BMPR2, KIAA1217, FBXW7, TMEM38B, ACVR2A, TIPARP, ACVR2B, LRP6
SMALL_MOLECULE_METABOLIC_PROCESS	0.14985	0.49275	IGF1, ST3GAL6, PAM, BMP6, MAN2A1, NDNF, BTD, INSR, ADIPOR1, AIG1, MGST3, CARMIL1, CPT1A, OSBP, TXN, UAP1, AUH, ZBTB20, PPA2, PON2, DPYD, PLA2G4A, FAR2, KDSR, MOXD1, ETFDH, NCOA2, SPTLC1, EPHX2, AK3, QDPR, CNBP, ALDH3A2, EXTL2, TK2, NR1D1, HGF, UCK2, GFI1, PLCL1, DHCR7, FDX1, EPHX1, MAGI3, CHP1, SRD5A3, APOL1, CRY1, DCTD
ATP_METABOLIC_PROCESS	0.152966	0.494411	IGF1, INSR, ZBTB20
PATTERN_SPECIFICATION_PROCESS	0.154463	0.494411	MLLT3, HIPK2, BMI1, BMPR2, ACVR2A, ACVR1, ACVR2B, LRP6
POSITIVE_REGULATION_OF_CELL_CYCLE	0.154463	0.494411	IGF1, CSPP1, INSR, RDX, PKP4, CDKN1A, LRP6
REGULATION_OF_ACTIN_FILAMENT_ORGANIZATION	0.154713	0.494411	FER, RDX, CARMIL1, JMY, CYFIP1, CFL2, KANK1, PAK1, PFN2
CELLULAR_RESPONSE_TO_OXYGEN_LEVELS	0.156379	0.494411	NDNF, HIPK2, CPEB2, FAM162A, NFE2L2, CPEB4, BCL2
GLUCOSE_METABOLIC_PROCESS	0.156379	0.494411	IGF1, INSR, ADIPOR1, CPT1A
ESTABLISHMENT_OF_PROTEIN_LOCALIZATION_TO_MEMBRANE	0.156566	0.494411	STOM, PRKCI, GOLGA4, SSR3, SEC63, TRAM1, PREPL, BCL2, PAK1, SSR1, CHP1
MESENCHYMAL_CELL_DIFFERENTIATION	0.156566	0.494411	ADIPOR1, ACVR1, LRP6, CORO1C, BCL2, HGF, RTN4, DDX5, JAG1, MDK, STAT1, WNT5A, TIAM1
ACTIN_POLYMERIZATION_OR_DEPOLYMERIZATION	0.156701	0.494411	FER, RDX, CARMIL1, JMY, CYFIP1, CFL2, KANK1, PFN2, JAK2
POSITIVE_REGULATION_OF_SUPRAMOLECULAR_FIBER_ORGANIZATION	0.157128	0.494411	FER, CARMIL1, JMY, CYFIP1, AKAP9, CFL2, PAK1, PFN2
POSITIVE_REGULATION_OF_CELL_CELL_ADHESION	0.163883	0.510468	IGF1, YES1, IL6ST, IL12A, CCR2, PAK1, F11R, MDK, CD274, WNT5A, NFKBIZ, SRC
BLOOD_VESSEL_MORPHOGENESIS	0.164329	0.510468	ITGAV, NDNF, RAPGEF2, HIPK2, BMPR2, FBXW7, TIPARP, ACVR1, PIK3C2A, NFE2L2, CCR2, MTDH
CELLULAR_RESPONSE_TO_PEPTIDE_HORMONE_STIMULUS	0.164329	0.510468	INSR, FER, ADIPOR1, CPEB2, PRKCI, PIK3C2A, CYFIP1, NFE2L2
ACTIVATION_OF_PROTEIN_KINASE_ACTIVITY	0.166499	0.513874	IGF1, INSR, MAP4K3, MAP3K13, TXN, GPRC5D, ACVR2B, HGF, PAK1, NRG3, GADD45A, ADAM9, GAS6, JAK2, MAPKAPK3, MAPKAPK2, KIT, WNT5A, IL6R, AVPI1, ADRB2, RAF1, SRC, SHC1
POSITIVE_REGULATION_OF_TRANSFERASE_ACTIVITY	0.166833	0.513874	IGF1, RAPGEF2, INSR, MAP4K3, BMI1, MAP3K13, TXN, FBXW7, GPRC5D, CDKN1A, ACVR2B, DKK1, HGF, PAK1, NRG3, GADD45A, LMO4, ADAM9, GAS6, JAK2, DDR2, MAPKAPK3, MAPKAPK2, PARP6, KIT, ITSN1, WNT5A, TIAM1, IL6R, AVPI1, PKD2, ADRB2, RAF1, CCND1
CELLULAR_AMIDE_METABOLIC_PROCESS	0.16983	0.520494	IGF1, PAM, BTD, CPD, DNAJC1, CPEB2, PPA2, EIF4E3, EIF2AK4, CYFIP1, SPCS3, FAR2, NFE2L2, SPTLC1, DNAJC24, NCSTN, CPEB4, MRPL32, CNBP, XRN1, EIF3J
NEGATIVE_REGULATION_OF_PROTEOLYSIS	0.170408	0.520494	HIPK2, DNAJC1, SVIP, CAST, TMEM59, LAMP3
CELLULAR_LIPID_CATABOLIC_PROCESS	0.172737	0.524179	AIG1, CPT1A, AUH, PLA2G4A, ETFDH, ALDH3A2, SRD5A3, NEU3
NEGATIVE_REGULATION_OF_NUCLEOBASE_CONTAINING_COMPOUND_METABOLIC_PROCESS	0.174825	0.524179	RBFOX2, BMP6, HIPK2, BMI1, ATXN1, CREG1, TET1, BMPR2, TXN, NFIL3, ZBTB20, NDFIP1, CLOCK, ACVR2B, KLF3, USP3, NCOA2, MTDH, PRDM5, KLF11, CNBP, ZBTB38, XRN1, RIOX2, NR1D1, DKK1, DUSP26, GFI1, DDX5, OTUD7B, KAT6B, BRMS1L, FNIP2, GAS6, NFE2L3, CRY1, PURA, ETV6, MAPKAPK2, FOXP2, STAT1, ZNF706, SMARCA5, LGR4, CDKN2A, IRF1, WNT5A, ESR1, HELB, EID1, CDC73
REGULATION_OF_CELLULAR_COMPONENT_BIOGENESIS	0.174825	0.524179	LRRN1, RAPGEF2, UNC13B, FER, RDX, CARMIL1, SVIP, CAMSAP2, JMY, CYFIP1, TBC1D12, AKAP9, ICE1, PDLIM5, FAM98A, CORO1C, STAG1, KANK1, DKK1, PAK1, CCSAP, PFN2, SH3GLB1, FNIP2, LMO4, CHMP4C
POSITIVE_REGULATION_OF_LOCOMOTION	0.175	0.524179	IGF1, ITGAV, RAPGEF2, INSR, FER, RDX, CARMIL1, BMPR2, ACVR1, PIK3C2A, NFE2L2, IL12A, CCR2, BCL2, HGF, PAK1, RTN4, ADAM9, CHMP4C, GAS6, JAK2, DDR2, MDK, CD274, PRKCA, KIT, WNT5A, TIAM1, IL6R, ITGA3, ZNF609, SPARC, PTGS2, SRC
DEVELOPMENTAL_MATURATION	0.175205	0.524179	IGF1, UNC13B, MAP3K13, CDKN1A
RESPONSE_TO_LIPID	0.176823	0.525547	RBFOX2, PAM, BMP6, FER, YES1, ABL2, CPT1A, CDKN1A, CLOCK, UBA5, LRP6, IL12A, CAPN2, NCOA2, MTDH, XRN1, BCL2, NR1D1, FECH, DKK1, PELI1, PAK1, GFI1, DDX5, FDX1, ADAM9, JAK2, GDAP2, CRY1, MAPKAPK3, MAPKAPK2, FOXP2, MDK, CD274, PRKCA, ESRRG
REGULATION_OF_INFLAMMATORY_RESPONSE	0.177598	0.525547	IGF1, IL6ST, NDFIP1, CLOCK, C5orf30, CCR2, TBC1D23, NR1D1, HGF, JAK2, CALCRL, MDK, RORA, WNT5A, ESR1, NFKBIZ, PTGS2
CYTOSKELETON_ORGANIZATION	0.177822	0.525547	PAM, FER, ABL2, RDX, CARMIL1, VPS54, EPB41L4A, DST, CAMSAP2, PRKCI, JMY, CYFIP1, FITM2, AKAP9, EHBP1, CAPN2, PDLIM5, CORO1C, TTBK2, CFL2, CLMN, NAV1, TBCEL, BCL2, STAG1, KANK1, RHOBTB3, PAK1, CCSAP, F11R, GADD45A, CFAP44, ARMC2, PFN2, CHMP4C, CHP1, JAK2, FGD4, SPICE1, EPB41L1, CCDC66, MDK, CSRP1, CLIP1, KIT, ARFGEF3, CRIPT, HOOK1, FMN1, RND3, PARD3, PKD2, FRMD6, RAF1, BST2, STARD9, SRC, NCKAP1, A…
POSITIVE_REGULATION_OF_MULTICELLULAR_ORGANISMAL_PROCESS	0.178821	0.526369	IGF1, BMP6, LRRN1, MAN2A1, NDNF, RAPGEF2, UNC13B, HIPK2, ADIPOR1, ABL2, IL6ST, BMPR2, MAP3K13, ATRAID, ZBTB20, SCARB2, PRKCI, ACVR2A, ACVR1, PIK3C2A, ACVR2B, GOLGA4, CYFIP1, NFE2L2, IL12A, SCAMP5, CCR2, SUCO, MTDH, TBC1D23, BCL2, CYB5D2, DKK1, HGF, PELI1, PAK1, RTN4, F11R, JAG1, ADAM9, GAS6, JAK2, ETV5, DDR2, TMEM106B, IFIH1, MAPKAPK2, FOXP2, TSHR, MDK, CD274, STAT1, PRKCA, ESRRG, PARP6, RORA, KI…
NEGATIVE_REGULATION_OF_PROTEIN_METABOLIC_PROCESS	0.180819	0.527469	IGF1, ITGAV, OXR1, HIPK2, DNAJC1, SVIP, CAST, ATRAID, CPEB2, CRTAP, TMEM59, CDKN1A, EIF2AK4, LAMP3, LRP6, DEPTOR, CORO1C, CPEB4, FAM122A, XRN1, DKK1, HGF, DUSP26, GADD45A, RIC1, GAS6, CHP1, CRY1, PURA, GPD1L
POSITIVE_REGULATION_OF_CELL_ADHESION	0.181181	0.527469	IGF1, ITGAV, NDNF, YES1, IL6ST, CARMIL1, IL12A, CCR2, PAK1, DUSP26, F11R, ADAM9, JAK2, MDK, CD274, PRKCA, WNT5A, FMN1, ITGA3, NFKBIZ
REGULATION_OF_CELLULAR_AMIDE_METABOLIC_PROCESS	0.181363	0.527469	IGF1, DNAJC1, CPEB2, EIF4E3, EIF2AK4, CYFIP1, NFE2L2, DNAJC24, CPEB4, CNBP, XRN1
POSITIVE_REGULATION_OF_CYTOSKELETON_ORGANIZATION	0.182474	0.528596	FER, CARMIL1, JMY, CYFIP1, AKAP9, CFL2, PAK1, PFN2
CHEMICAL_HOMEOSTASIS	0.185814	0.532338	TMTC2, ITGAV, BMP6, UNC13B, INSR, ADIPOR1, ABL2, FBXW7, ZBTB20, NDFIP1, TMEM38B, SLC39A8, RMDN3, LRP6, FITM2, TMCO1, SLC30A1, SLC40A1, CCR2, SLC31A2, EPHX2, BCL2, NR1D1, RTN4, PLCL1, SLMAP, XPR1, GAS6, CHP1, JAK2, CRY1, GRHL1, LSR, HMGN3, NDUFAF2, GPD1L
CELLULAR_RESPONSE_TO_LIPID	0.188	0.532338	RBFOX2, BMP6, YES1, ABL2, CPT1A, CLOCK, UBA5, LRP6, IL12A, CAPN2, MTDH, NR1D1, FECH, PAK1, GFI1, DDX5, FDX1, ADAM9, JAK2, CRY1, CD274, PRKCA, ESRRG, RORA, WNT5A, ESR1, GRIP1, CDC73
REGULATION_OF_CELL_DEATH	0.188811	0.532338	IGF1, ITGAV, OXR1, BMP6, NDNF, RAPGEF2, UNC13B, HIPK2, NAA35, IL6ST, CAST, TXN, FBXW7, PRKCI, CDKN1A, JMY, ACVR1, FAM162A, EIF2AK4, LAMP3, NFE2L2, LRP6, IL12A, SLC40A1, CAPN2, DEPTOR, SPTLC1, MTDH, NCSTN, CPEB4, BMP8B, AVEN, KLF11, ARHGEF12, BCL2, DKK1, HGF, PELI1, RTN4, SORT1
NEGATIVE_REGULATION_OF_CELL_MOTILITY	0.189135	0.532338	ADIPOR1, PTPRG, C5orf30, NFE2L2, MCC, CORO1C, BCL2, KANK1, NRG3, PFN2, JAG1
DEVELOPMENTAL_GROWTH_INVOLVED_IN_MORPHOGENESIS	0.189135	0.532338	BMPR2, MAP3K13, EIF2AK4, GOLGA4, CYFIP1, LRP6, IFRD1, SPART, PAK1, RTN4
REGULATION_OF_TRANSMEMBRANE_TRANSPORT	0.189379	0.532338	IGF1, INSR, YES1, STOM, TMEM38B, PRKCI, NFE2L2, SLC30A1, AKAP9, CCR2, SLC31A2
REGULATION_OF_CELLULAR_CARBOHYDRATE_METABOLIC_PROCESS	0.189386	0.532338	IGF1, INSR, ADIPOR1, SCARB2, NCOA2, NR1D1
CARBOHYDRATE_DERIVATIVE_BIOSYNTHETIC_PROCESS	0.18981	0.532338	IGF1, TMTC2, ST3GAL6, MAN2A1, TET1, MAN1A2, BMPR2, UAP1, TMEM59, STT3B, ALG8, NCSTN, AK3, MCFD2, BCL2, EXTL2, TK2, UCK2, CHP1, SRD5A3, DCTD, OST4, GK5, GNPDA1, DOLK, EOGT, CHSY3
CELL_CYCLE_G1_S_PHASE_TRANSITION	0.190329	0.532338	RDX, FBXW7, CDKN1A, ACVR1, KLF11, BCL2, GFI1, GADD45A, PCBP4, CDKN2A, CDC73, PKD2, CCND1, ID2
CELLULAR_CARBOHYDRATE_METABOLIC_PROCESS	0.192385	0.534001	IGF1, INSR, ADIPOR1, IL6ST, GYG1, SCARB2, NCOA2, GNPTAB
MESODERM_DEVELOPMENT	0.192387	0.534001	BMPR2, ACVR2A, ACVR1, MESD, ACVR2B, DKK1, ITGA8, JAK2
ACTIN_FILAMENT_ORGANIZATION	0.194389	0.537514	FER, RDX, CARMIL1, PRKCI, JMY, CYFIP1, CORO1C, CFL2, BCL2, KANK1, RHOBTB3, PAK1, PFN2, JAK2
HOMEOSTASIS_OF_NUMBER_OF_CELLS	0.19798	0.542242	RBFOX2, HIPK2, VPS54, ACVR2A, SLC40A1, CCR2, NCSTN, BCL2, JAK2, KLF13, STAT1, KIT, LGR4
PEPTIDE_BIOSYNTHETIC_PROCESS	0.198198	0.542242	DNAJC1, CPEB2, PPA2, EIF4E3, EIF2AK4, CYFIP1, NFE2L2, DNAJC24, CPEB4, MRPL32, CNBP, XRN1, EIF3J, RRBP1, EIF5B, SECISBP2L, PURA, CTIF, ZNF706
EPIDERMIS_DEVELOPMENT	0.20102	0.542242	INSR, PKP4, ALDH3A2, BCL2, PTCH2, DKK1, JAG1, ADAM9, GRHL1, PERP, LGR4, WNT5A
OXIDATION_REDUCTION_PROCESS	0.201798	0.542242	IGF1, OXR1, PAM, INSR, ADIPOR1, MGST3, IL6ST, GYG1, TET1, CPT1A, TXN, AUH, DPYD, FAR2, KDSR, MOXD1, ETFDH, DNAJC24, QDPR, ALDH3A2, SUMF1, SQOR, RIOX2, NR1D1, CYB5R1, GPHN, SESN1
CARBOHYDRATE_DERIVATIVE_METABOLIC_PROCESS	0.201798	0.542242	IGF1, TMTC2, ST3GAL6, MAN2A1, NDNF, INSR, TET1, MAN1A2, BMPR2, UAP1, ZBTB20, TMEM59, DPYD, STT3B, FAR2, GANAB, ALG8, GNPTAB, SEL1L, NCSTN, AK3, MCFD2, SUMF1, BCL2, EXTL2, TK2, HGF, UCK2, MAGI3, CHP1, SRD5A3, DCTD, NEU3, GPD1L, OST4, GK5, GNPDA1, DOLK, RORA, KIT, EOGT, CHSY3
REGULATION_OF_CELLULAR_LOCALIZATION	0.201798	0.542242	FER, RDX, SVIP, TXN, STOM, FBXW7, TMEM38B, USP46, TMEM59, PRKCI, MESD, ICE1, TTBK2, BCL2, LZTFL1, ZFAND1, NR1D1, PAK1, RTN4, OTUD7B, SH3GLB1, GAS6, CHP1, HMGN3, NDUFAF2, GPD1L, CCDC66, SELENON, RAB11FIP5, CRIPT, WNT5A, TIAM1, ITGA3, PARD3, PKD2
NEGATIVE_REGULATION_OF_CELL_DIFFERENTIATION	0.202	0.542242	IGF1, ITGAV, RAPGEF2, ADIPOR1, FBXW7, PTPRG, EIF2AK4, NFE2L2, CORO1C, IFRD1, BCL2, NR1D1, SPART, KANK1, DKK1, PAK1, RTN4, GFI1, SORT1, NRG3, JAG1
REGULATION_OF_T_CELL_ACTIVATION	0.202041	0.542242	IGF1, YES1, IL6ST, NDFIP1, IL12A, CCR2, PELI1, PAK1
CELLULAR_RESPONSE_TO_ACID_CHEMICAL	0.202869	0.54247	YES1, ABL2, RRAGD, CPT1A, CAPN2, CPEB4, SESN1
HOMEOSTATIC_PROCESS	0.206793	0.546855	TMTC2, ITGAV, RBFOX2, BMP6, UNC13B, INSR, HIPK2, ADIPOR1, ABL2, VPS54, TXN, FBXW7, ZBTB20, NDFIP1, TMEM38B, RAB3D, SLC39A8, ACVR2A, ACVR2B, RMDN3, NFE2L2, LRP6, FITM2, TMCO1, SLC30A1, SLC40A1, CCR2, SLC31A2, NCSTN, EPHX2, CFL2, TMX2, XRN1, BCL2, NR1D1, RTN4, PLCL1, SLMAP, XPR1, GAS6, CHP1, LRRC8A, JAK2, CRY1, GRHL1, LSR, HMGN3, NDUFAF2, KLF13, GPD1L, TSHR, CCDC66, GLRX2, STAT1, PRKCA, ESRRG, SELE…
EMBRYO_DEVELOPMENT	0.207792	0.546855	IGF1, ITGAV, MAN2A1, INSR, HIPK2, TET1, BMPR2, KIAA1217, ACVR2A, ACVR1, ACVR2B, NFE2L2, LRP6, SLC30A1, UBR3, CAPN2, TBC1D23, TMEM107, DKK1, RTN4, CCSAP, OTUD7B, ITGA8, LMO4
METHYLATION	0.207819	0.546855	TET1, RAB3D, PCMTD1, FAM98A, PRDM5, RAB6A, GFI1, RAB3B
POSITIVE_REGULATION_OF_PEPTIDE_SECRETION	0.207819	0.546855	IGF1, BMP6, UNC13B, SCAMP5, ADAM9, JAK2, IFIH1, MDK, CD274, ITSN1, WNT5A
AMEBOIDAL_TYPE_CELL_MIGRATION	0.209	0.546855	FER, ADIPOR1, BMPR2, FBXW7, PTPRG, ACVR1, PIK3C2A, C5orf30, NFE2L2, MCC, CORO1C, KANK1, PAK1, RTN4, PFN2, ADAM9, DDR2
REGULATION_OF_PHOSPHORYLATION	0.20979	0.546855	IGF1, BMP6, RAPGEF2, INSR, HIPK2, FER, YES1, MAP4K3, IL6ST, BMPR2, MAP3K13, TXN, FBXW7, ZBTB20, GPRC5D, CDKN1A, PJA2, ACVR2A, ACVR1, EIF2AK4, CCNL1, ACVR2B, LRP6, IL12A, AKAP9, DEPTOR, CORO1C, BMP8B, BCL2, DKK1, HGF, RELL1, PAK1, DUSP26, NRG3, PLCL1, GADD45A, PFN2, FNIP2, LMO4, MAGI3, ADAM9, GAS6, CHP1, JAK2, DDR2, NDUFS4
REGULATION_OF_SMALL_MOLECULE_METABOLIC_PROCESS	0.210843	0.546855	IGF1, BMP6, INSR, ADIPOR1, CPT1A, ZBTB20, NCOA2, EPHX2, NR1D1, GFI1, DHCR7
VESICLE_MEDIATED_TRANSPORT_IN_SYNAPSE	0.211224	0.546855	CADPS2, UNC13B, USP46, CYFIP1, FCHO2, PREPL, RAPGEF4, PFN2, RAB3B
ACTIN_FILAMENT_BASED_PROCESS	0.211788	0.546855	PAM, FER, ABL2, RDX, MYO6, CARMIL1, EPB41L4A, PRKCI, JMY, CYFIP1, AKAP9, EHBP1, PDLIM5, CORO1C, CFL2, BCL2, KANK1, RHOBTB3, PAK1, F11R, PFN2, JAK2, FGD4, GPD1L, EPB41L1, MDK, CSRP1
RESPONSE_TO_PEPTIDE	0.212	0.546855	IGF1, INSR, FER, ADIPOR1, CPEB2, PRKCI, STAT4, PIK3C2A, CYFIP1, KLF3, NFE2L2, LRP6, KLF11, QDPR, KANK1, PAK1, SORT1, JAG1, JAK2, CRY1
REGULATION_OF_GROWTH	0.212787	0.546953	IGF1, INSR, ADIPOR1, CREG1, BMPR2, VPS54, MAP3K13, CDKN1A, GOLGA4, CYFIP1, SELENOP, IFRD1, FAM122A, BCL2, PTCH2, SPART, PAK1, RTN4, NRG3, BRMS1L, GAS6
PHOSPHOLIPID_BIOSYNTHETIC_PROCESS	0.216189	0.553746	PIP5K1B, TMEM38B, PIK3C2A, PLA2G4A, FITM2, CAPN2, SPTLC1, SLC44A1, SRD5A3, GPD1L, DOLK, STARD10, MBOAT1, PIGM
ION_HOMEOSTASIS	0.217782	0.555405	TMTC2, ITGAV, BMP6, ABL2, NDFIP1, TMEM38B, SLC39A8, RMDN3, LRP6, TMCO1, SLC30A1, SLC40A1, CCR2, SLC31A2, EPHX2, BCL2, PLCL1, SLMAP, XPR1, CHP1, JAK2
MICROTUBULE_CYTOSKELETON_ORGANIZATION	0.218437	0.555405	FER, DST, CAMSAP2, AKAP9, TTBK2, NAV1, TBCEL, STAG1, PAK1, CCSAP, GADD45A, CFAP44, ARMC2, CHMP4C, CHP1, SPICE1, CCDC66, CLIP1, CRIPT, HOOK1, PARD3, PKD2
REGULATION_OF_NEUROTRANSMITTER_LEVELS	0.219659	0.555405	CADPS2, UNC13B, INSR, DPYD, SLC30A1, MOXD1, PREPL, SLC44A1, PFN2, JAK2, LIN7C, RAB3B
T_CELL_ACTIVATION	0.21988	0.555405	IGF1, YES1, IL6ST, NDFIP1, EIF2AK4, IL12A, CCR2, NCSTN, BCL2, PELI1, PAK1, MDK, CD274, RORA, KIT, IRF1
INTRINSIC_APOPTOTIC_SIGNALING_PATHWAY	0.227366	0.562733	HIPK2, FBXW7, CDKN1A, JMY, NFE2L2, BCL2, DDX5, FNIP2, JAK2, PERP, CIDEB, PTGS2, SRC
REGULATION_OF_EMBRYONIC_DEVELOPMENT	0.227557	0.562733	IGF1, INSR, NFE2L2, DKK1, CCSAP
RESPONSE_TO_CORTICOSTEROID	0.227557	0.562733	PAM, BMP6, CDKN1A, BCL2, FECH, ADAM9, MDK, ALAD, SPARC, CCND1, PTGS2, SRC
RESPONSE_TO_INSULIN	0.228457	0.562733	INSR, FER, ADIPOR1, CPEB2, PRKCI, PIK3C2A, CYFIP1, KANK1, PAK1, SORT1
REGULATION_OF_DNA_BINDING_TRANSCRIPTION_FACTOR_ACTIVITY	0.229689	0.562733	HIPK2, FER, MAP3K13, PRKCI, JMY, CLOCK, EIF2AK4, LRP6, MTDH, PELI1, GFI1, GAS6, CHP1, JAK2, DDR2, KIT, CDKN2A, WNT5A, ESR1, PKD2, SGK3, ID2
SUPRAMOLECULAR_FIBER_ORGANIZATION	0.232	0.562733	FER, RDX, CARMIL1, DST, CAMSAP2, PRKCI, JMY, CYFIP1, AKAP9, CORO1C, TTBK2, CFL2, BCL2, KANK1, RHOBTB3, PAK1, CCSAP, PFN2, CHP1, JAK2, DDR2
LEUKOCYTE_CELL_CELL_ADHESION	0.232323	0.562733	IGF1, YES1, IL6ST, NDFIP1, IL12A, CCR2, PELI1, PAK1, F11R
TRANSMEMBRANE_RECEPTOR_PROTEIN_SERINE_THREONINE_KINASE_SIGNALING_PATHWAY	0.232698	0.562733	BMP6, ZFYVE9, HIPK2, BMPR2, ACVR2A, ACVR1, ACVR2B, BMP8B, SPART, DKK1, DDX5, F11R, ITGA8, ADAM9
SENSORY_ORGAN_DEVELOPMENT	0.233233	0.562733	BMP6, MAN2A1, CRYBG3, HIPK2, BMPR2, SMOC1, PRKCI, ACVR2B, LRP6
REGULATION_OF_HORMONE_SECRETION	0.233673	0.562733	BMP6, CPT1A, CLOCK, NR1D1, RAPGEF4, JAK2, CRY1, HMGN3, NDUFAF2, PRKCA, RAB11FIP5, ITSN1, TIAM1
REGULATION_OF_ANATOMICAL_STRUCTURE_MORPHOGENESIS	0.233766	0.562733	MLLT3, RAPGEF2, HIPK2, RDX, CARMIL1, BMPR2, MAP3K13, FBXW7, ACVR1, PIK3C2A, GOLGA4, CYFIP1, NFE2L2, FITM2, CCR2, CAPN2, PDLIM5, MTDH, CORO1C, IFRD1, BCL2, SPART, KANK1, DKK1, HGF, RHOBTB3, PAK1, RTN4, PRICKLE2, F11R, JAG1, ADAM9, ETV5, FGD4, FOXP2, MDK, STAT1, PRKCA, PARP6, KIT, LGR4, TMEM135, WNT5A, ESR1, TIAM1, RND3, GRIP1, SYT1, SPARC, PTGS2, SRC, ARHGAP18, ADAM10, AHI1, SULF2
POSITIVE_REGULATION_OF_VASCULATURE_DEVELOPMENT	0.234131	0.562733	RAPGEF2, HIPK2, PIK3C2A, NFE2L2, MTDH, HGF, MDK, PRKCA, KIT, WNT5A, IL6R
RHYTHMIC_PROCESS	0.234343	0.562733	PAM, CPT1A, NFIL3, FBXW7, CLOCK, NCOA2, NR1D1, DDX5, CRY1, MDK, RORA, LGR4, ESR1, BHLHE41, ID2, SRC
NEGATIVE_REGULATION_OF_APOPTOTIC_SIGNALING_PATHWAY	0.236626	0.565363	IGF1, ITGAV, ACVR1, NFE2L2, BCL2, HGF
REGULATION_OF_RESPONSE_TO_EXTERNAL_STIMULUS	0.237762	0.565363	IGF1, BMP6, UNC13B, IL6ST, BMPR2, NDFIP1, CDKN1A, PJA2, CLOCK, EIF2AK4, C5orf30, NFE2L2, IL12A, CCR2, TBC1D23, NR1D1, HGF, PELI1, PAK1, RTN4, GFI1, F11R, GAS6, JAK2, CALCRL, IFIH1, MAPKAPK3, MAPKAPK2, MDK, STAT1, PRKCA, RORA, LGR4, IRF1, WNT5A, ESR1, TIAM1, IL6R
POSITIVE_REGULATION_OF_IMMUNE_SYSTEM_PROCESS	0.237762	0.565363	IGF1, FER, YES1, IL6ST, CDKN1A, PJA2, ACVR2A, EIF2AK4, CYFIP1, IL12A, CCR2, BCL2, NR1D1, PELI1, PAK1, RTN4, GFI1, JAG1, GAS6, DENND1B, IFIH1, MAPKAPK3, MAPKAPK2, MDK, CD274, STAT1, PRKCA, LGR4, IRF1, WNT5A, ESR1, IL6R, RAF1, NFKBIZ, ID2, SRC, NCKAP1, ADAM10
RESPONSE_TO_MOLECULE_OF_BACTERIAL_ORIGIN	0.241968	0.565849	BMP6, FER, IL12A, CAPN2, MTDH, NR1D1, PELI1, GFI1, ADAM9, JAK2, MAPKAPK3, MAPKAPK2, CD274, PRKCA, WNT5A, CDC73, ALAD, SPARC, PTGS2, SRC
CELL_CYCLE	0.242757	0.565849	IGF1, CSPP1, INSR, HIPK2, FER, BMI1, RDX, RRAGD, PKP4, FBXW7, CDKN1A, JMY, CLOCK, ACVR1, EIF2AK4, CCNL1, LRP6, IL12A, USP3, AKAP9, PRDM5, KLF11, BCL2, TLK1, SNX18, STAG1, HGF, GFI1, CCSAP, GADD45A, SH3GLB1, CHMP4C, GAS6, CRY1, KLHL21, SPICE1, PRKCA, PCBP4, CLIP1, CDKN2A, IRF1, WNT5A, EID1, AVPI1, CDC73, C6orf89, PARD3, CDK14, PKD2, PPP1R12B, CCND1, ID2, PTGS2, STARD9, KLHL9, SRC
PROTEIN_MATURATION	0.244151	0.565849	CPD, NAA35, CAST, TMEM59, SPCS3, NCSTN
REGULATION_OF_RHO_PROTEIN_SIGNAL_TRANSDUCTION	0.244259	0.565849	ABL2, ARHGAP42, ARHGEF12, KANK1, F11R, FGD4, ITSN1, TIAM1, ITGA3, RAF1, ARHGEF3
ADAPTIVE_IMMUNE_RESPONSE	0.244444	0.565849	IL6ST, NDFIP1, EIF2AK4, LAMP3, IL12A, CCR2, OTUD7B, JAG1, DENND1B, JAK2, CD274, RORA, IRF1
NEGATIVE_REGULATION_OF_CATALYTIC_ACTIVITY	0.245	0.565849	RDX, CAST, CPEB2, CDKN1A, LAMP3, LRP6, AKAP9, CCR2, DEPTOR, CORO1C, FAM122A, HGF, DUSP26, GFI1, SORT1, F11R, GADD45A, FNIP2, GAS6, CHP1
EXTRINSIC_APOPTOTIC_SIGNALING_PATHWAY	0.246185	0.565849	IGF1, ITGAV, ACVR1, IL12A, DEPTOR, BCL2, HGF, SORT1, JAK2
RAS_PROTEIN_SIGNAL_TRANSDUCTION	0.246246	0.565849	IGF1, RAPGEF2, ARHGAP5, ABL2, RDX, RAB3D, CDKN1A, CYFIP1, ARHGAP42, ARHGEF12, RAB6A, KANK1, RHOBTB3, F11R, JAK2, RAB3B, FGD4, CDKN2A, ITSN1, ARFGEF3, TIAM1, RND3, ITGA3, RAB28, RAF1, ARHGEF3, NCKAP1, RAB2B, SHC1
PROTEIN_PROCESSING	0.246347	0.565849	CPD, CAST, TMEM59, SPCS3, NCSTN
HORMONE_MEDIATED_SIGNALING_PATHWAY	0.246465	0.565849	RBFOX2, ADIPOR1, CLOCK, UBA5, NR1D1, PAK1, DDX5, JAK2, CRY1, TSHR, ESRRG, RORA, LGR4, ESR1, GRIP1
MESENCHYME_DEVELOPMENT	0.246493	0.565849	ADIPOR1, BMPR2, ACVR1, LRP6, CORO1C, BCL2, HGF, RTN4, DDX5, JAG1, MDK, STAT1, WNT5A, TIAM1, PKD2
POSITIVE_REGULATION_OF_SECRETION	0.247485	0.566345	IGF1, CADPS2, BMP6, UNC13B, RAB3D, SCAMP5, ADAM9, JAK2, IFIH1, MDK, CD274, ITSN1, WNT5A, SYT1, SRC, RAB2B
CELL_MORPHOGENESIS_INVOLVED_IN_DIFFERENTIATION	0.253746	0.574976	ITGAV, RBFOX2, RAPGEF2, FER, LAMC1, CARMIL1, BMPR2, MAP3K13, GOLGA4, CYFIP1, PDLIM5, CORO1C, IFRD1, BCL2, SPART, KANK1, DKK1, RHOBTB3, PAK1, RTN4, ITGA8, S100A6, TMEM106B, BTBD3, MDK, PRKCA, PARP6, WNT5A, TIAM1, PARD3, FRMD6, EPHA6, ID2, NCAM1, SRC, ADAM10, SHC1
MACROAUTOPHAGY	0.256122	0.574976	RRAGD, WIPI1, TBC1D12, MAP1LC3B2, GABARAPL1, SPTLC1, SESN1, SH3GLB1, CHMP4C, TOMM70
ORGAN_GROWTH	0.256701	0.574976	IGF1, TMEM38B, ACVR2B, PDLIM5, BCL2, PAK1, DDR2
NEGATIVE_REGULATION_OF_CYTOKINE_PRODUCTION	0.256701	0.574976	IGF1, NDFIP1, C5orf30, IL12A, HGF, OTUD7B, GAS6, IFIH1, CD274, LGR4
REGULATION_OF_CELL_POPULATION_PROLIFERATION	0.256743	0.574976	IGF1, ITGAV, RBFOX2, BMP6, RAPGEF2, INSR, HIPK2, FER, YES1, LAMC1, BMI1, IL6ST, TET1, BMPR2, ATRAID, FBXW7, NDFIP1, PRKCI, CDKN1A, STAT4, PLA2G4A, MCC, LRP6, IL12A, CCR2, FAM98A, KLF11, CNBP, CLMN, BCL2, NR1D1, PELI1, PAK1, RTN4, TMEM127, DHCR7, SSR1, JAG1, GAS6, JAK2, TNS3, ETV5, DDR2, NDUFS4, S100A6, PURA, CALCRL, NDRG1, KLF13, IL5RA, FOXP2, TSHR, MDK, CD274, STAT1, PRKCA, SELENON, KIT, CDKN2A,…
REGULATION_OF_CELL_CYCLE	0.256743	0.574976	IGF1, CSPP1, INSR, HIPK2, BMI1, RDX, RRAGD, PKP4, FBXW7, CDKN1A, JMY, CLOCK, EIF2AK4, CCNL1, LRP6, IL12A, AKAP9, BCL2, STAG1, CCSAP, GADD45A, SH3GLB1, CHMP4C, GAS6, CRY1, KLHL21, SPICE1, PRKCA, PCBP4, CDKN2A, IRF1, WNT5A, CDC73, C6orf89, CDK14, PKD2, CCND1, ID2, PTGS2, KLHL9, SRC
POSITIVE_REGULATION_OF_PROTEIN_SERINE_THREONINE_KINASE_ACTIVITY	0.25677	0.574976	IGF1, RAPGEF2, INSR, MAP4K3, MAP3K13, DKK1, HGF, PAK1, GADD45A, ADAM9, JAK2, MAPKAPK3, MAPKAPK2, PARP6, KIT, WNT5A, TIAM1, AVPI1, PKD2, ADRB2, RAF1, CCND1, SRC, SHC1
MEMBRANE_LIPID_METABOLIC_PROCESS	0.259105	0.57843	ST3GAL6, TEX2, KDSR, SPTLC1, ALDH3A2, SUMF1
RESPONSE_TO_STEROID_HORMONE	0.26026	0.579238	RBFOX2, PAM, BMP6, CDKN1A, CLOCK, UBA5, NCOA2, BCL2, NR1D1, FECH, PAK1, DDX5, ADAM9, JAK2, CRY1, MDK, ESRRG, RORA, ESR1, GRIP1, ALAD, SPARC, CCND1, PTGS2, SRC
PROTEIN_PHOSPHORYLATION	0.263736	0.581645	IGF1, ITGAV, BMP6, RAPGEF2, INSR, HIPK2, FER, YES1, MAP4K3, ABL2, IL6ST, BMPR2, MAP3K13, TXN, FBXW7, GPRC5D, PRKCI, CDKN1A, PJA2, ACVR2A, ACVR1, EIF2AK4, CCNL1, ACVR2B, LRP6, IL12A, AKAP9, DEPTOR, CORO1C, TTBK2, BMP8B, BCL2, TLK1, DKK1, HGF, RELL1, PAK1, DUSP26, NRG3, PLCL1, GADD45A, PFN2, FNIP2, MAGI3, ADAM9, GAS6, CHP1, JAK2, DDR2, CRY1, NDUFS4, GPD1L, MAPKAPK3, IL5RA, RPS6KC1, MAPKAPK2, PRKCA,…
POSITIVE_REGULATION_OF_RESPONSE_TO_BIOTIC_STIMULUS	0.264056	0.581645	BMP6, UNC13B, PJA2, IL12A, NR1D1, PELI1, PAK1, RTN4, GFI1, IFIH1, MAPKAPK3, MAPKAPK2, CD274, PRKCA, LGR4, IRF1, WNT5A, ESR1
DRUG_METABOLIC_PROCESS	0.264529	0.581645	IGF1, BTD, INSR, DPYD, PLA2G4A, MOXD1, EPHX2, AK3, QDPR, ALDH3A2, SQOR
REGULATION_OF_LYMPHOCYTE_ACTIVATION	0.264529	0.581645	IGF1, YES1, IL6ST, NDFIP1, CDKN1A, IL12A, CCR2, BCL2, PELI1, PAK1, GAS6, MDK, CD274
POSITIVE_REGULATION_OF_CELLULAR_COMPONENT_BIOGENESIS	0.2668	0.58409	LRRN1, UNC13B, FER, CARMIL1, JMY, CYFIP1, AKAP9, ICE1, FAM98A, PAK1, PFN2, SH3GLB1, FNIP2, PRKCA, CLIP1, KIT, FMN1, ESR1
ENERGY_DERIVATION_BY_OXIDATION_OF_ORGANIC_COMPOUNDS	0.267407	0.58409	IGF1, INSR, IL6ST, GYG1
APPENDAGE_DEVELOPMENT	0.268041	0.58409	PAM, BMPR2, SMOC1, LRP6, TMEM107, DKK1, ZNF358, WNT5A, FMN1
REGULATION_OF_RESPONSE_TO_BIOTIC_STIMULUS	0.269539	0.585606	BMP6, UNC13B, PJA2, EIF2AK4, IL12A, NR1D1, PELI1, PAK1, RTN4, GFI1, JAK2, IFIH1, MAPKAPK3, MAPKAPK2, CD274, STAT1, PRKCA, LGR4, IRF1, WNT5A, ESR1, RAF1, SRC, ELMOD2
DEVELOPMENTAL_GROWTH	0.271	0.587033	IGF1, INSR, BMPR2, MAP3K13, TMEM38B, CDKN1A, EIF2AK4, ACVR2B, GOLGA4, CYFIP1, LRP6, PDLIM5, IFRD1, BCL2, SPART, PAK1, RTN4, DHCR7, BCL9
REGULATION_OF_PROTEIN_LOCALIZATION_TO_MEMBRANE	0.274227	0.591567	STOM, TMEM59, PRKCI, MESD, BCL2, LZTFL1, PAK1, CHP1
MAMMARY_GLAND_DEVELOPMENT	0.274714	0.591567	PAM, ARHGAP5, LRP6, RTN4, NRG3, JAK2, ETV5, WNT5A, ESR1, CCND1, ID2, SRC
POSITIVE_REGULATION_OF_DEFENSE_RESPONSE	0.275551	0.591624	UNC13B, IL6ST, PJA2, CLOCK, IL12A, CCR2, NR1D1, PELI1, PAK1, RTN4, GFI1, JAK2, IFIH1, MAPKAPK3, MAPKAPK2, MDK, LGR4, IRF1, WNT5A, ESR1, RAF1, NFKBIZ, PTGS2, SRC
RECEPTOR_MEDIATED_ENDOCYTOSIS	0.276618	0.592173	INSR, USP46, SCARB2, LRP6, FCHO2, DKK1, APOL1, CALCRL
MULTI_MULTICELLULAR_ORGANISM_PROCESS	0.277662	0.59267	PAM, BMPR2, ACVR2A, CAPN2, BCL2
HORMONE_TRANSPORT	0.280684	0.594971	BMP6, CPT1A, CLOCK, ACVR2B, NR1D1, RAPGEF4, SNX19, JAK2, CRY1, HMGN3, NDUFAF2, PRKCA, RAB11FIP5, ITSN1, TIAM1
REGULATION_OF_IMMUNE_SYSTEM_PROCESS	0.281718	0.594971	IGF1, RBFOX2, FER, YES1, IL6ST, FBXW7, NDFIP1, CDKN1A, PJA2, ACVR2A, EIF2AK4, CYFIP1, NFE2L2, IL12A, CCR2, BCL2, NR1D1, PELI1, PAK1, RTN4, GFI1, JAG1, GAS6, DENND1B, JAK2, IFIH1, KLF13, MAPKAPK3, MAPKAPK2, MDK, CD274, STAT1, PRXL2A, PRKCA, RORA, KIT, LGR4, IRF1, WNT5A, ESR1, IL6R, CDC73, RAF1, NFKBIZ, ID2, BST2, SRC, NCKAP1, ELMOD2, ADAM10, SHC1
TRANSMEMBRANE_RECEPTOR_PROTEIN_TYROSINE_KINASE_SIGNALING_PATHWAY	0.281718	0.594971	IGF1, ITGAV, RBFOX2, RAPGEF2, INSR, FER, ADIPOR1, YES1, FBXW7, PTPRG, TIPARP, PIK3C2A, CYFIP1
EPITHELIAL_CELL_PROLIFERATION	0.282	0.594971	IGF1, BMP6, LAMC1, BMPR2, FBXW7, ACVR2A, MCC, NCSTN, NR1D1, HGF, RTN4, PURA, FOXP2, MDK, STAT1, PRKCA, KIT, LGR4, WNT5A, ESR1, CDC73, C6orf89, SPARC, CCND1, ID2
REGULATION_OF_SYMBIOSIS_ENCOMPASSING_MUTUALISM_THROUGH_PARASITISM	0.28616	0.602009	ITGAV, STOM, EIF2AK4, LAMP3, BCL2, DDX5, CHMP4C, STAT1
DEFENSE_RESPONSE	0.287712	0.603534	IGF1, BMP6, UNC13B, IL6ST, NDFIP1, USP46, PJA2, CLOCK, ACVR1, STAT4, EIF2AK4, C5orf30, NFE2L2, IL12A, CCR2, TBC1D23, EPHX2, BCL2, NR1D1, HGF, PELI1, PAK1, RTN4, GFI1, F11R, JAK2, APOL1, CALCRL, IFIH1, MAPKAPK3, IL5RA, MAPKAPK2, MDK, STAT1, RORA, KIT, LGR4, IRF1, WNT5A, ESR1, IL6R, RAF1, NFKBIZ, BST2, PTGS2, NCAM1, SRC, ELMOD2
SMALL_GTPASE_MEDIATED_SIGNAL_TRANSDUCTION	0.289	0.604499	IGF1, RAPGEF2, ARHGAP5, ABL2, RDX, RAB3D, CDKN1A, FAM13A, CYFIP1, ARHGAP42, ARHGEF12, RAB6A, KANK1, RHOBTB3, RAPGEF4, F11R, CHP1, JAK2, RAB3B, FGD4, ARHGAP32, CDKN2A, ITSN1, ARFGEF3, TIAM1, RALGAPA1, RND3, ITGA3, RAB28, RAF1, ARHGEF3, SRC, NCKAP1, RAB2B, ARHGAP18, SHC1
TUBE_DEVELOPMENT	0.291708	0.60842	ITGAV, MAN2A1, NDNF, RAPGEF2, HIPK2, MAN1A2, BMPR2, FBXW7, TMEM38B, CDKN1A, TIPARP, ACVR1, PIK3C2A, ACVR2B, NFE2L2, LRP6, CCR2, MTDH, BCL2, TMEM107, HGF, PAK1, DHCR7, JAG1, LMO4, TNS3, ETV5, CALCRL, FOXP2, MDK, ZNF358, STAT1, PRKCA, SELENON, RORA, KIT, LGR4, WNT5A, FMN1, ESR1
POSITIVE_REGULATION_OF_RESPONSE_TO_EXTERNAL_STIMULUS	0.294	0.611453	BMP6, UNC13B, IL6ST, BMPR2, PJA2, CLOCK, IL12A, CCR2, NR1D1, PELI1, PAK1, RTN4, GFI1, GAS6, JAK2, IFIH1, MAPKAPK3, MAPKAPK2, MDK, PRKCA, LGR4, IRF1, WNT5A, ESR1, TIAM1, IL6R, RAF1, NFKBIZ, PTGS2, SRC, ADAM10
NEGATIVE_REGULATION_OF_LOCOMOTION	0.295591	0.613016	ADIPOR1, PTPRG, C5orf30, NFE2L2, MCC, CORO1C, BCL2, KANK1, NRG3, PFN2, JAG1
MYELOID_CELL_HOMEOSTASIS	0.297495	0.613516	RBFOX2, HIPK2, ACVR2A, CCR2, NCSTN, JAK2, KLF13, STAT1, KIT
REGULATION_OF_ANIMAL_ORGAN_MORPHOGENESIS	0.297595	0.613516	MLLT3, BMPR2, FBXW7, ACVR1, BCL2, DKK1, HGF, PRICKLE2, JAG1, ETV5, FOXP2, MDK, STAT1, LGR4, WNT5A, ESR1, TIAM1
LIPID_CATABOLIC_PROCESS	0.298354	0.613516	AIG1, CPT1A, AUH, PLA2G4A, ETFDH, ALDH3A2, SRD5A3, NEU3
REGULATION_OF_PROTEIN_SERINE_THREONINE_KINASE_ACTIVITY	0.299599	0.614347	IGF1, RAPGEF2, INSR, MAP4K3, MAP3K13, CDKN1A, CCNL1, LRP6, DKK1, HGF, PAK1, GADD45A, ADAM9, JAK2, MAPKAPK3, MAPKAPK2, PARP6, KIT, CDKN2A, WNT5A, TIAM1, AVPI1, PKD2, ADRB2, RAF1, CCND1, SRC, SHC1
RHO_PROTEIN_SIGNAL_TRANSDUCTION	0.30102	0.615195	ARHGAP5, ABL2, ARHGAP42, ARHGEF12, KANK1, RHOBTB3, F11R, FGD4, ITSN1, TIAM1, RND3, ITGA3, RAF1, ARHGEF3
REGULATION_OF_PHOSPHORUS_METABOLIC_PROCESS	0.301698	0.615195	IGF1, BMP6, RAPGEF2, INSR, HIPK2, FER, YES1, MAP4K3, IL6ST, BMPR2, MAP3K13, TXN, FBXW7, ZBTB20, GPRC5D, CDKN1A, PJA2, ACVR2A, ACVR1, EIF2AK4, CCNL1, ACVR2B, LRP6, IL12A, AKAP9, CAPN2, DEPTOR, CORO1C, BMP8B, FAM122A, BCL2, DKK1, HGF, RELL1, PAK1, DUSP26, NRG3, PLCL1, GADD45A, PFN2, FNIP2, LMO4, MAGI3, ADAM9, GAS6, CHP1, JAK2, DDR2, NDUFS4
REGULATION_OF_LEUKOCYTE_DIFFERENTIATION	0.30281	0.615741	FBXW7, NDFIP1, IL12A, CCR2, GAS6, MDK, PRXL2A, PRKCA, IRF1, NFKBIZ, ID2
REGULATION_OF_EPITHELIAL_CELL_MIGRATION	0.305611	0.619712	ADIPOR1, BMPR2, FBXW7, PTPRG, PIK3C2A, NFE2L2, MCC, CORO1C, RTN4, PFN2, ADAM9, PRKCA, WNT5A, ITGA3, SPARC, PTGS2, SRC
CELL_PROJECTION_ASSEMBLY	0.307	0.620803	RAPGEF2, FER, RDX, CARMIL1, CYFIP1, C5orf30, AKAP9, FAM98A, CORO1C, TTBK2, TMEM107, KANK1, CFAP44, ARMC2, PFN2
REGENERATION	0.308402	0.621915	IGF1, CDKN1A, IFRD1, BCL2, HGF, BCL9, GAS6, JAK2, MDK, SELENON
POSITIVE_REGULATION_OF_HYDROLASE_ACTIVITY	0.313	0.628526	RAPGEF2, ARHGAP5, ABL2, DNAJC1, PKP4, FAM162A, FAM13A, ARHGAP42, TBC1D12, DNAJC24, CORO1C, ARHGEF12, SNX18, F11R, PFN2, RIC1, DENND1B, JAK2, PERP, TBC1D30, ARHGAP32, KIT, WNT5A, ESR1, TIAM1, RALGAPA1, C6orf89, CIDEB, ELMOD2, ARHGAP18, NPRL2
NEGATIVE_REGULATION_OF_CELL_CELL_ADHESION	0.313402	0.628526	BMP6, RDX, NDFIP1, PELI1, JAG1, JAK2, MDK, CD274, IRF1, FXYD5
PROTEIN_AUTOPHOSPHORYLATION	0.316162	0.631636	INSR, FER, YES1, MAP3K13, EIF2AK4, PAK1, CHP1, JAK2, DDR2, MAPKAPK3, MAPKAPK2
CELLULAR_PROTEIN_CONTAINING_COMPLEX_ASSEMBLY	0.316683	0.631636	CADPS2, UNC13B, FER, RDX, CARMIL1, CAMSAP2, JMY, PIK3C2A, CYFIP1, AKAP9, FCHO2, EIF3J, TBCEL, KANK1, ATPAF1, PAK1, RTN4, NRG3, PFN2, KAT6B, JAK2, NDUFS4, NDUFAF2, SMARCA5, CLIP1, NDUFB4, LUC7L2, NDUFC2, FMN1, ESR1, TIAM1, CDC73, ADRB2, SRC, NCKAP1, NAP1L5, SWI5, ARHGAP18
REGULATION_OF_GTPASE_ACTIVITY	0.318318	0.633167	RAPGEF2, ARHGAP5, RDX, PKP4, CPEB2, FAM13A, ARHGAP42, TBC1D12, SBF2, CORO1C, ARHGEF12, SNX18, F11R, RIC1, DENND1B, FGD4, TBC1D30, ARHGAP32, WNT5A, TIAM1, RALGAPA1
REGULATION_OF_BINDING	0.31992	0.634623	IGF1, RAPGEF2, HIPK2, TXN, FBXW7, TTBK2, BCL2, DKK1, PLCL1, JAK2, WNT5A, TIAM1, HABP4, ADRB2, ID2, SRC
REGULATION_OF_SMALL_GTPASE_MEDIATED_SIGNAL_TRANSDUCTION	0.322645	0.637147	IGF1, ARHGAP5, ABL2, RDX, FAM13A, ARHGAP42, ARHGEF12, KANK1, F11R, JAK2, FGD4, ARHGAP32, ITSN1, ARFGEF3, TIAM1, RALGAPA1, ITGA3, RAF1, ARHGEF3, SRC, ARHGAP18, SHC1
REGULATION_OF_RAS_PROTEIN_SIGNAL_TRANSDUCTION	0.322938	0.637147	IGF1, ABL2, RDX, ARHGAP42, ARHGEF12, KANK1, F11R, JAK2, FGD4, ITSN1, ARFGEF3, TIAM1, ITGA3, RAF1, ARHGEF3, SHC1
CELL_CELL_ADHESION	0.324675	0.63767	IGF1, ITGAV, BMP6, FER, YES1, RDX, IL6ST, PKP4, NDFIP1, ACVR1, LRP6, IL12A, CCR2, PDLIM5, BCL2, PELI1, PAK1, F11R, ITGA8, JAG1, ADAM9, GAS6, JAK2, MDK, CSRP1, CD274, PERP, PRKCA, KIT, IRF1, WNT5A, FXYD5
STRESS_ACTIVATED_PROTEIN_KINASE_SIGNALING_CASCADE	0.32495	0.63767	HIPK2, MAP4K3, MAP3K13, PJA2, DKK1, HGF, RELL1, PAK1, GADD45A, MAGI3
IMMUNE_RESPONSE_REGULATING_SIGNALING_PATHWAY	0.326981	0.638875	FER, YES1, PJA2, CYFIP1, BCL2, NR1D1, PELI1, PAK1, RTN4, GFI1, DENND1B, IFIH1, MAPKAPK3, MAPKAPK2, KIT, LGR4, IRF1, ESR1, RAF1, NFKBIZ, SRC, NCKAP1, SHC1, DUSP22
RESPONSE_TO_METAL_ION	0.327984	0.638875	PAM, BMP6, SLC30A1, SLC40A1, NCSTN, QDPR, BCL2, FECH, GPHN, ADAM9, NDRG1, KIT, GGH, WNT5A, SLC30A5, ALAD, PKD2, SYT1, SPARC, CCND1, ID2, PTGS2
SKIN_DEVELOPMENT	0.328189	0.638875	PKP4, BCL2, PTCH2, DKK1, JAG1, ADAM9, GRHL1, LSR, PERP, LGR4, WNT5A, ITGA3
EPITHELIUM_DEVELOPMENT	0.330669	0.639551	MLLT3, BMP6, RAPGEF2, MPP5, RDX, BMPR2, CPT1A, PKP4, TMEM38B, CDKN1A, CLOCK, ACVR1, ACVR2B, LRP6, SLC40A1, BCL2, PTCH2, TMEM107, DKK1, HGF, PAK1, RTN4, PRICKLE2, F11R, JAG1, LMO4, ADAM9, JAK2, LIN7C, ETV5, GRHL1, FOXP2, MDK, ZNF358, PERP, STAT1
REGULATION_OF_KINASE_ACTIVITY	0.331668	0.639551	IGF1, RAPGEF2, INSR, MAP4K3, MAP3K13, TXN, FBXW7, GPRC5D, CDKN1A, CCNL1, ACVR2B, LRP6, DEPTOR, CORO1C, DKK1, HGF, PAK1, DUSP26, NRG3, GADD45A, LMO4, ADAM9, GAS6, CHP1, JAK2, DDR2, MAPKAPK3, MAPKAPK2, PARP6, KIT, CDKN2A, ITSN1, WNT5A, TIAM1, IL6R, AVPI1, PKD2, ADRB2, RAF1, CCND1
CELLULAR_COMPONENT_MORPHOGENESIS	0.331668	0.639551	ITGAV, RBFOX2, RAPGEF2, FER, LAMC1, MPP5, RDX, CARMIL1, BMPR2, MAP3K13, EIF2AK4, GOLGA4, CYFIP1, FITM2, PDLIM5, CORO1C, IFRD1, CFL2, BCL2, SPART, KANK1, DKK1, HGF, RHOBTB3, PAK1, RTN4, F11R, ITGA8, S100A6, TMEM106B, BTBD3, FGD4, MDK, CSRP1, PRKCA, PARP6, KIT, WNT5A, TIAM1, RND3, GRIP1, PARD3, FRMD6, SYT1, SPARC, EPHA6, ID2, NCAM1, SRC, NCKAP1, ARHGAP18, ADAM10, SHC1
NEUROGENESIS	0.332667	0.639551	RBFOX2, BMP6, MAN2A1, NDNF, RAPGEF2, HIPK2, ABL2, MPP5, IL6ST, BMPR2, MAP3K13, CAMSAP2, PTPRG, SCARB2, PRKCI, EIF2AK4, GOLGA4, CYFIP1, NFE2L2, LRP6, CCR2, PDLIM5, PRDM5, NCSTN, TBC1D23, IFRD1, CLMN, NAV1, BCL2, CYB5D2, NR1D1, SPART, KANK1, DKK1, HGF, RHOBTB3, PAK1, RTN4, GFI1, NRG3, JAG1, LMO4, GAS6, JAK2, ETV5, S100A6, ETV6, TMEM106B, NDRG1, BTBD3
MITOCHONDRION_ORGANIZATION	0.333667	0.639551	IGF1, MAN2A1, FBXW7, WIPI1, FAM162A, MAP1LC3B2, GABARAPL1, BCL2, SLC25A36, HGF, ATPAF1, CISD2, SH3GLB1, FNIP2, NDUFS4, TOMM70, NDUFAF2, SELENON, NDUFB4, TMEM135, NDUFC2
RESPONSE_TO_INORGANIC_SUBSTANCE	0.334	0.639551	PAM, BMP6, TXN, NFE2L2, SLC30A1, SLC40A1, CAPN2, SELENOP, NCSTN, QDPR, BCL2, ZFAND1, FECH, HGF, GPHN, ADAM9, NDRG1, GLRX2, STAT1, KIT, GGH, WNT5A, SLC30A5, ALAD, PKD2, SYT1, SPARC, CCND1, ID2, PTGS2, SRC
POSTTRANSCRIPTIONAL_REGULATION_OF_GENE_EXPRESSION	0.334669	0.639551	DNAJC1, CPEB2, EIF4E3, EIF2AK4, CYFIP1, DNAJC24, CPEB4, CNBP, XRN1, DDX5, EIF5B, SECISBP2L, PURA, MAPKAPK2, PRKCA, PCBP4, CTIF, ZNF706, ESR1, HABP4
PROTEIN_COMPLEX_OLIGOMERIZATION	0.336735	0.641818	PAM, INSR, CPT1A, STOM, TMCC1, SH3GLB1, CHP1, LRRC8A, AASS, ALAD, PKD2, SYT1, SRC
POSITIVE_REGULATION_OF_GTPASE_ACTIVITY	0.339357	0.644252	RAPGEF2, ARHGAP5, PKP4, FAM13A, ARHGAP42, TBC1D12, CORO1C, ARHGEF12, SNX18, F11R, RIC1, DENND1B, TBC1D30, ARHGAP32, WNT5A, TIAM1, RALGAPA1
RESPONSE_TO_BACTERIUM	0.34034	0.644252	BMP6, UNC13B, FER, SLC17A5, IL12A, CAPN2, MTDH, NR1D1, PELI1, GFI1, ADAM9, JAK2, MAPKAPK3, MAPKAPK2, CD274, PRKCA, WNT5A, IL6R, CDC73, ALAD, SPARC, PTGS2, SRC, SHC1
REGULATION_OF_HYDROLASE_ACTIVITY	0.340659	0.644252	RAPGEF2, ARHGAP5, ABL2, RDX, DNAJC1, CAST, PKP4, CPEB2, SCARB2, FAM162A, FAM13A, LAMP3, ARHGAP42, TBC1D12, SBF2, DNAJC24, CORO1C, ARHGEF12, FAM122A, SNX18, HGF, SORT1, F11R, PFN2, RIC1, GAS6, CHP1, DENND1B, JAK2, FGD4, PERP, TBC1D30, ARHGAP32, KIT, ARFGEF3, WNT5A, ESR1, TIAM1, RALGAPA1, C6orf89, RAF1, CIDEB, BST2, PTGS2, SRC, ELMOD2, RCAN1, ARHGAP18, NPRL2, IQGAP2
POSITIVE_REGULATION_OF_CYTOKINE_PRODUCTION	0.341683	0.644519	IL6ST, ZBTB20, IL12A, SCAMP5, CCR2, TBC1D23, HGF, PELI1, JAK2, IFIH1, MAPKAPK2, MDK, CD274, STAT1, RORA, IRF1, WNT5A, IL6R, PTGS2, SRC, SULF2
ORGANIC_CYCLIC_COMPOUND_CATABOLIC_PROCESS	0.345106	0.648657	TET1, DPYD, NFE2L2, MOXD1, EPHX2, QDPR, XRN1, DDX5, MAPKAPK2, PRKCA, PCBP4, CTIF
NEGATIVE_REGULATION_OF_MOLECULAR_FUNCTION	0.345654	0.648657	RDX, CAST, CPEB2, FBXW7, NDFIP1, CDKN1A, EIF2AK4, LAMP3, LRP6, AKAP9, CCR2, DEPTOR, CORO1C, TTBK2, FAM122A, DKK1, HGF, PELI1, DUSP26, GFI1, SORT1, F11R, GADD45A, FNIP2, GAS6, CHP1, JAK2
ENDOMEMBRANE_SYSTEM_ORGANIZATION	0.348044	0.651467	MPP5, CAMSAP2, GOLGB1, TMEM38B, SCARB2, AKAP9, CORO1C, TMCC1, RTN4, TMEM127, SH3GLB1, CHMP4C, SNX19, NDRG1, RTN3, PRKCA
REGULATION_OF_TUBE_SIZE	0.349636	0.651728	BMPR2, PIK3C2A, ARHGAP42, EPHX2
CELL_SUBSTRATE_ADHESION	0.35035	0.651728	ITGAV, NDNF, FER, LAMC1, CARMIL1, CORO1C, BCL2, KANK1, ITGA8, JAG1, ADAM9, GAS6, JAK2, MDK, CDKN2A, FMN1, TIAM1, ITGA3
REGULATION_OF_TRANS_SYNAPTIC_SIGNALING	0.351703	0.651728	RAPGEF2, UNC13B, USP46, EIF2AK4, CYFIP1, SLC30A1, AKAP9, CCR2, NCSTN, PREPL, DKK1, NRG3, PLCL1, PFN2, JAK2, RAB3B
SEX_DIFFERENTIATION	0.352525	0.651728	BMP6, INSR, ACVR2A, TIPARP, LRP6, BCL2, RHOBTB3, KIT, LGR4, WNT5A, ESR1, CCND1, SRC
NEGATIVE_REGULATION_OF_MULTICELLULAR_ORGANISMAL_PROCESS	0.352647	0.651728	IGF1, RAPGEF2, ADIPOR1, BMPR2, FBXW7, NDFIP1, PTPRG, EIF2AK4, ACVR2B, ARHGAP42, C5orf30, NFE2L2, MCC, IL12A, CCR2, CORO1C, IFRD1, BCL2, NR1D1, SPART, KANK1, DKK1, HGF, PAK1, RTN4, GFI1, NRG3, OTUD7B, PLCL1, PFN2, JAG1, GAS6, JAK2, CRY1, CALCRL, IFIH1, KLF13, MDK, CD274, STAT1, ZNF706, RAB11FIP5, LGR4, IRF1, WNT5A
REGULATION_OF_CELL_CYCLE_PROCESS	0.354709	0.653189	IGF1, CSPP1, INSR, BMI1, RDX, PKP4, FBXW7, CDKN1A, AKAP9, BCL2, STAG1, CCSAP, GADD45A, SH3GLB1, CHMP4C, KLHL21, SPICE1, PCBP4, CDKN2A, WNT5A, CDC73, PKD2, CCND1, ID2, KLHL9
REACTIVE_OXYGEN_SPECIES_METABOLIC_PROCESS	0.356122	0.653189	INSR, CDKN1A, NFE2L2, EPHX2, BCL2, SESN1, GADD45A, JAK2, NDUFS4, NDUFAF2
NEGATIVE_REGULATION_OF_RESPONSE_TO_EXTERNAL_STIMULUS	0.356122	0.653189	IGF1, NDFIP1, CDKN1A, C5orf30, NR1D1, HGF, CALCRL, MDK, RORA, WNT5A
LYMPHOCYTE_ACTIVATION	0.357357	0.653812	IGF1, YES1, IL6ST, NDFIP1, CDKN1A, EIF2AK4, IL12A, CCR2, NCSTN, BCL2, PELI1, PAK1, GAS6, LRRC8A, PURA, MDK, CD274, RORA, KIT, IRF1, NFKBIZ, ID2, BST2, SRC
CARDIOVASCULAR_SYSTEM_DEVELOPMENT	0.361	0.655749	ITGAV, NDNF, RAPGEF2, HIPK2, BMPR2, FBXW7, TIPARP, ACVR1, PIK3C2A, ACVR2B, NFE2L2, CCR2, MTDH, HGF, DHCR7, JAG1, CALCRL, MDK, STAT1, PRKCA, LTBP1, RORA, KIT, WNT5A, IL6R
LYMPHOCYTE_DIFFERENTIATION	0.361111	0.655749	NDFIP1, IL12A, CCR2, BCL2, GAS6, LRRC8A, MDK, RORA, KIT, IRF1, NFKBIZ, ID2
INSULIN_SECRETION	0.361111	0.655749	CPT1A, CLOCK, ACVR2B, NR1D1, RAPGEF4, SNX19, JAK2, HMGN3, NDUFAF2, PRKCA, RAB11FIP5, TIAM1, RAF1, BMP8A
POSITIVE_REGULATION_OF_STRESS_ACTIVATED_PROTEIN_KINASE_SIGNALING_CASCADE	0.364754	0.660721	HIPK2, MAP3K13, PJA2, DKK1, RELL1, PAK1, GADD45A
CELLULAR_RESPONSE_TO_HORMONE_STIMULUS	0.366633	0.662051	RBFOX2, INSR, FER, ADIPOR1, RDX, CPEB2, PRKCI, CLOCK, PIK3C2A, CYFIP1, UBA5, NFE2L2, NCOA2, NR1D1, FECH, KANK1, PAK1, DDX5, JAK2, CRY1, TSHR, STAT1, ESRRG, RORA, KIT, LGR4
POSITIVE_REGULATION_OF_MAP_KINASE_ACTIVITY	0.368104	0.662051	IGF1, INSR, MAP4K3, MAP3K13, DKK1, HGF, PAK1, GADD45A, ADAM9, JAK2, MAPKAPK3, MAPKAPK2, KIT, WNT5A, TIAM1, AVPI1, RAF1, SRC, SHC1
NEGATIVE_REGULATION_OF_GROWTH	0.368209	0.662051	ADIPOR1, BMPR2, CDKN1A, IFRD1, BCL2, SPART, PAK1, RTN4
REGULATION_OF_INTRACELLULAR_SIGNAL_TRANSDUCTION	0.373626	0.666009	IGF1, BMP6, RAPGEF2, INSR, HIPK2, ADIPOR1, ARHGAP5, MAP4K3, ABL2, RDX, RRAGD, MAP3K13, PIP5K1B, TXN, FBXW7, NDFIP1, PJA2, JMY, TFG, FAM13A, ARHGAP42, GOLT1B, NFE2L2, DEPTOR, MTDH, BMP8B, ARHGEF12, BCL2, NR1D1, KANK1, DKK1, HGF, PELI1, RELL1, PAK1, RTN4, DUSP26, SESN1, TMEM127, DDX5, F11R, OTUD7B, GADD45A, FNIP2, MAGI3, ADAM9, GAS6, CHP1, JAK2, TAF4B, FGD4, GPD1L, MAPKAPK3, MAPKAPK2, STAT1, PRKCA,…
TRANSMEMBRANE_TRANSPORT	0.374625	0.666009	IGF1, ITGAV, INSR, YES1, CPT1A, STOM, TMEM38B, PRKCI, SLC39A8, SLC17A5, NFE2L2, TMCO1, SLC30A1, ANO10, SLC40A1, AKAP9, CCR2, SEC63, TRAM1, SLC31A2, SEL1L, SLC44A1, BCL2, SLC25A36, SORT1, SLC25A16, PLCL1, SLMAP, XPR1, GAS6, CHP1, LRRC8A, APOL1, TOMM70, S100A6, GPD1L, SLC2A13, SELENON, KCNN3, ANO5, FXYD5, SLC25A20, SLC30A5, SLC35A5, OSTM1, PKD2, ADRB2, SGK3, RAF1, GABRR2
RESPONSE_TO_CYTOKINE	0.374625	0.666009	ST3GAL6, FER, ADIPOR1, MAP4K3, IL6ST, NFIL3, PRKCI, CDKN1A, STAT4, LAMP3, NFE2L2, IL12A, CCR2, CAPN2, PRDM5, BCL2, NR1D1, HGF, PELI1, GFI1, KAT6B, ADAM9, GAS6, JAK2, IFIH1, MAPKAPK3, IL5RA, MAPKAPK2, CD274, STAT1, PRKCA, SMARCA5, RORA, KIT, IRF1, WNT5A, IL6R, ALAD, SPARC, CCND1, BST2, PTGS2, NCAM1, SRC, ADAM10, SHC1
REGULATION_OF_RESPONSE_TO_STRESS	0.374625	0.666009	IGF1, OXR1, UNC13B, HIPK2, IL6ST, MAP3K13, SVIP, TXN, FBXW7, NDFIP1, CDKN1A, PJA2, CLOCK, EIF2AK4, C5orf30, NFE2L2, IL12A, CCR2, TBC1D23, BCL2, NR1D1, KANK1, DKK1, HGF, PELI1, RELL1, PAK1, RTN4, SESN1, GFI1, DDX5, F11R, GADD45A, MAGI3, JAK2, CRY1, CALCRL, IFIH1, ATF6, MAPKAPK3, MAPKAPK2, MDK, STAT1, PRKCA, SELENON, RORA, LGR4, CDKN2A, IRF1, WNT5A, ESR1, TIAM1
NEGATIVE_REGULATION_OF_DEVELOPMENTAL_PROCESS	0.376623	0.666009	IGF1, ITGAV, RAPGEF2, ADIPOR1, BMPR2, FBXW7, NDFIP1, PTPRG, CDKN1A, EIF2AK4, NFE2L2, CCR2, CORO1C, IFRD1, BCL2, NR1D1, SPART, KANK1, DKK1, PAK1, RTN4, GFI1, SORT1, NRG3, JAG1, GAS6
IMMUNE_EFFECTOR_PROCESS	0.376623	0.666009	ITGAV, FER, YES1, GYG1, CREG1, SVIP, STOM, NDFIP1, RAB3D, EIF2AK4, CYFIP1, COMMD3, MLEC, IL12A, CCR2, NCSTN, BCL2, RAB6A, PAK1, JAG1, DENND1B, IFIH1, MDK, STAT1, RORA, KIT, IRF1, NDUFC2, GGH, WNT5A, TMEM179B, ALAD, NFKBIZ, BST2, NIT2, SRC, NCKAP1, ELMOD2, ADAM10, DUSP22, IQGAP2
RESPONSE_TO_ALCOHOL	0.376827	0.666009	USP46, CDKN1A, LRP6, XRN1, FECH, FDX1, GGH, ALAD, SPARC, CCND1
INORGANIC_ION_TRANSMEMBRANE_TRANSPORT	0.378	0.666009	ITGAV, STOM, TMEM38B, SLC39A8, SLC17A5, TMCO1, SLC30A1, ANO10, SLC40A1, AKAP9, SLC31A2, PLCL1, SLMAP, XPR1, GAS6, CHP1, APOL1, GPD1L, SELENON, KCNN3, ANO5, FXYD5, SLC30A5, PKD2, GABRR2
POSITIVE_REGULATION_OF_INTRACELLULAR_SIGNAL_TRANSDUCTION	0.378621	0.666009	IGF1, RAPGEF2, INSR, HIPK2, MAP4K3, RRAGD, MAP3K13, TXN, FBXW7, NDFIP1, PJA2, TFG, GOLT1B, MTDH, BCL2, DKK1, HGF, PELI1, RELL1, PAK1, RTN4, DDX5, F11R, GADD45A, ADAM9, GAS6, JAK2
JNK_CASCADE	0.380468	0.666561	HIPK2, MAP4K3, MAP3K13, PJA2, DKK1, PAK1, GADD45A, MAGI3
SIGNAL_RELEASE	0.380762	0.666561	CADPS2, BMP6, UNC13B, CPT1A, CLOCK, ACVR2B, SLC30A1, PREPL, NR1D1, RAPGEF4, PFN2, SNX19, JAK2, LIN7C, CRY1, HMGN3, NDUFAF2, PRKCA, RAB11FIP5, ITSN1, TIAM1
REGULATION_OF_PEPTIDE_HORMONE_SECRETION	0.386221	0.6725	CPT1A, CLOCK, NR1D1, RAPGEF4, JAK2, HMGN3, NDUFAF2, PRKCA, ITSN1, TIAM1
REGULATION_OF_PROTEASOMAL_PROTEIN_CATABOLIC_PROCESS	0.386598	0.6725	SVIP, FBXW7, LAMP3, NFE2L2, FAM122A
STRIATED_MUSCLE_CELL_DIFFERENTIATION	0.388164	0.6725	IGF1, ACVR1, CAPN2, PDLIM5, CFL2, BCL2, DKK1, PAK1, SORT1, BCL9
POSITIVE_REGULATION_OF_RNA_METABOLIC_PROCESS	0.388611	0.6725	IGF1, MLLT3, BMP6, INSR, HIPK2, YES1, MYO6, HNRNPLL, TET1, BMPR2, NFIL3, FBXW7, JMY, ACVR2A, CLOCK, ACVR1, STAT4, NFE2L2, LRP6, SLC40A1, ICE1, NCOA2, MTDH, CNBP, ZBTB38, NR1D1, HGF, ARID3B, GFI1, DDX5, BCL9, KAT6B, ITGA8, JAG1, LMO4, ETV5, NFE2L3, TAF4B, ETV6, GRHL1, ATF6, HMGN3, KLF13, MDK, STAT1, ESRRG, SMARCA5, RORA, LGR4, IRF1, WNT5A, ESR1, HABP4, GRIP1, CDC73, PKD2, ADRB2, ZNF609, RAF1
NEGATIVE_REGULATION_OF_TRANSFERASE_ACTIVITY	0.389353	0.6725	CDKN1A, LRP6, DEPTOR, CORO1C, DUSP26, GADD45A, CHP1, CDKN2A, SRC, NPRL2, DUSP22, MBIP, PARP3
CELLULAR_PROCESS_INVOLVED_IN_REPRODUCTION_IN_MULTICELLULAR_ORGANISM	0.389796	0.6725	IGF1, ACVR1, BCL2, CFAP44, ARMC2, ETV5, TAF4B, ETV6, MDK, KIT, HOOK1
TISSUE_MIGRATION	0.390782	0.6725	ADIPOR1, BMPR2, FBXW7, PTPRG, PIK3C2A, NFE2L2, MCC, CORO1C, KANK1, RTN4, PFN2, ADAM9, PRKCA, KIT, WNT5A, ITGA3, SPARC, PTGS2, SRC
REGULATION_OF_STRESS_ACTIVATED_PROTEIN_KINASE_SIGNALING_CASCADE	0.391524	0.6725	HIPK2, MAP3K13, PJA2, DKK1, HGF, RELL1, PAK1, GADD45A, MAGI3
RESPONSE_TO_ACID_CHEMICAL	0.39318	0.673758	BMP6, YES1, ABL2, RRAGD, CPT1A, CAPN2, CPEB4, DKK1, SESN1
CELL_PROJECTION_ORGANIZATION	0.395604	0.675575	RBFOX2, NDNF, RAPGEF2, INSR, FER, ABL2, RDX, CARMIL1, BMPR2, MAP3K13, CAMSAP2, PTPRG, SCARB2, PRKCI, EIF2AK4, GOLGA4, CYFIP1, C5orf30, NFE2L2, AKAP9, PDLIM5, FAM98A, CORO1C, TTBK2, TBC1D23, IFRD1, CLMN, BCL2, TMEM107, SPART, KANK1, DKK1, HGF, RHOBTB3, PAK1, RTN4, GFI1, CFAP44, ARMC2, PFN2, ITGA8
GERM_CELL_DEVELOPMENT	0.396091	0.675575	IGF1, ACVR1, BCL2, CFAP44, ARMC2, ETV5, TAF4B, MDK, KIT, HOOK1
SULFUR_COMPOUND_METABOLIC_PROCESS	0.402806	0.683378	ST3GAL6, NDNF, BTD, MGST3, FAR2, NFE2L2
POSITIVE_REGULATION_OF_PROTEIN_KINASE_B_SIGNALING	0.406054	0.683378	INSR, TXN, MTDH, HGF, RTN4, GAS6, KIT, ITSN1, ESR1
MICROTUBULE_BASED_PROCESS	0.406814	0.683378	FER, DST, CAMSAP2, AKAP9, TTBK2, NAV1, TBCEL, RAB6A, STAG1, PAK1, CCSAP, GADD45A, CFAP44, ARMC2, CHMP4C, CHP1, PURA, SPICE1, CCDC66, CLIP1, CRIPT, HOOK1, PARD3, PKD2
RESPONSE_TO_UV	0.406868	0.683378	MAP4K3, CDKN1A, EIF2AK4, IL12A, BCL2
GLYCEROLIPID_METABOLIC_PROCESS	0.407816	0.683378	PIP5K1B, CPT1A, FBXW7, PIK3C2A, PLA2G4A, FITM2, CAPN2, SEL1L, SLC44A1, GPD1L, INPP1, GK5, FAM126B, STARD10, MBOAT1, PIGM, FAAH, SOCS7, CISH, FGF2, SOCS2
REGULATION_OF_ENDOTHELIAL_CELL_MIGRATION	0.407908	0.683378	BMPR2, FBXW7, PIK3C2A, NFE2L2
POSITIVE_REGULATION_OF_CELLULAR_BIOSYNTHETIC_PROCESS	0.408591	0.683378	IGF1, MLLT3, BMP6, INSR, HIPK2, YES1, MYO6, TET1, BMPR2, SVIP, NFIL3, FBXW7, JMY, ACVR2A, CLOCK, ACVR1, STAT4, EIF2AK4, NFE2L2, LRP6, SLC40A1, CCR2, ICE1, CAPN2, NCOA2, MTDH, NCSTN, CNBP, ZBTB38, NR1D1, HGF, ARID3B, GFI1, BCL9, KAT6B, ITGA8, JAG1, LMO4, CHP1, JAK2, ETV5, NFE2L3, TAF4B, ETV6, GRHL1, ATF6, HMGN3, KLF13, MAPKAPK2, MDK, STAT1, ESRRG, CTIF, SMARCA5, RORA, LGR4, IRF1, WNT5A, ESR1, HABP…
PROTEIN_KINASE_B_SIGNALING	0.408811	0.683378	IGF1, INSR, TXN, MTDH, HGF, RTN4, GAS6, KIT, ITSN1, ESR1
ACTOMYOSIN_STRUCTURE_ORGANIZATION	0.412071	0.68524	CARMIL1, EPB41L4A, CFL2, PAK1, F11R, PFN2, EPB41L1, CSRP1, FRMD6, SRC, PPFIA1
REGULATION_OF_TRANSFERASE_ACTIVITY	0.412587	0.68524	IGF1, RAPGEF2, INSR, MAP4K3, BMI1, MAP3K13, TXN, FBXW7, GPRC5D, CDKN1A, CCNL1, ACVR2B, LRP6, DEPTOR, CORO1C, DKK1, HGF, PAK1, DUSP26, NRG3, GADD45A, LMO4, ADAM9, GAS6, CHP1, JAK2, DDR2, MAPKAPK3, MAPKAPK2, PARP6, KIT, CDKN2A, ITSN1, WNT5A, TIAM1, IL6R, AVPI1, PKD2, ADRB2, RAF1, CCND1
REGULATION_OF_IMMUNE_EFFECTOR_PROCESS	0.413021	0.68524	FER, NDFIP1, EIF2AK4, IL12A, CCR2
AMIDE_BIOSYNTHETIC_PROCESS	0.414	0.685306	DNAJC1, CPEB2, PPA2, EIF4E3, EIF2AK4, CYFIP1, NFE2L2, SPTLC1, DNAJC24, CPEB4, MRPL32, CNBP, XRN1, EIF3J
RESPONSE_TO_HORMONE	0.416583	0.686745	RBFOX2, PAM, BMP6, INSR, FER, ADIPOR1, RDX, CPEB2, PRKCI, CDKN1A, CLOCK, STAT4, PIK3C2A, CYFIP1, UBA5, NFE2L2, LRP6, NCOA2, QDPR, XRN1, BCL2, NR1D1, FECH, KANK1, PAK1, DDX5, SORT1
ORGANIC_ACID_BIOSYNTHETIC_PROCESS	0.416751	0.686745	ADIPOR1, MGST3, OSBP, DPYD, PLA2G4A, EPHX2, NR1D1
PEPTIDE_HORMONE_SECRETION	0.420142	0.687885	CPT1A, CLOCK, ACVR2B, NR1D1, RAPGEF4, SNX19, JAK2, HMGN3, NDUFAF2, PRKCA, RAB11FIP5, ITSN1, TIAM1, RAF1, BMP8A
DEVELOPMENT_OF_PRIMARY_SEXUAL_CHARACTERISTICS	0.420619	0.687885	INSR, ACVR2A, TIPARP, BCL2, RHOBTB3, KIT, WNT5A, ESR1, CCND1, SRC
ANATOMICAL_STRUCTURE_FORMATION_INVOLVED_IN_MORPHOGENESIS	0.421578	0.687885	ITGAV, NDNF, HIPK2, MPP5, TET1, BMPR2, FBXW7, ACVR1, PIK3C2A, ACVR2B, NFE2L2, LRP6, SLC40A1, CCR2, CAPN2, MTDH, CFL2, DKK1, HGF, RTN4, NRG3, ITGA8, JAG1, LMO4, ADAM9, CALCRL, MDK, CSRP1, PERP, STAT1, PRKCA
REGULATION_OF_CYSTEINE_TYPE_ENDOPEPTIDASE_ACTIVITY	0.4238	0.687885	CAST, FAM162A, LAMP3, HGF, GAS6, JAK2, PERP, RAF1, CIDEB, PTGS2, SRC
LEUKOCYTE_DIFFERENTIATION	0.423848	0.687885	FBXW7, NDFIP1, IL12A, CCR2, BCL2, GAS6, LRRC8A, MDK, PRXL2A, PRKCA, RORA, KIT, IRF1, OSTM1, NFKBIZ, ID2, SRC
SYNAPTIC_SIGNALING	0.427	0.687885	CADPS2, RAPGEF2, UNC13B, USP46, EIF2AK4, CYFIP1, LRP6, SLC30A1, AKAP9, CCR2, NCSTN, PREPL, DKK1, NRG3, PLCL1, PFN2, JAK2, LIN7C, ETV5, RAB3B
REGULATION_OF_PROTEOLYSIS	0.428	0.687885	HIPK2, DNAJC1, SVIP, CAST, FBXW7, TMEM59, FAM162A, LAMP3, NFE2L2
SMALL_MOLECULE_BIOSYNTHETIC_PROCESS	0.428	0.687885	BMP6, ADIPOR1, MGST3, OSBP, DPYD, PLA2G4A, MOXD1, SPTLC1, EPHX2, QDPR, CNBP, TK2, NR1D1, UCK2, GFI1, PLCL1, DHCR7, SRD5A3, CRY1
RESPONSE_TO_PEPTIDE_HORMONE	0.43043	0.687885	INSR, FER, ADIPOR1, CPEB2, PRKCI, STAT4, PIK3C2A, CYFIP1, NFE2L2, LRP6, QDPR, KANK1, PAK1, SORT1, JAK2, CRY1, TSHR, STAT1
CELLULAR_RESPONSE_TO_BIOTIC_STIMULUS	0.431633	0.687885	BMP6, TMCO1, IL12A, CAPN2, MTDH, NR1D1, GFI1, ADAM9, CD274, PRKCA, WNT5A, CDC73
NEUROTRANSMITTER_SECRETION	0.431959	0.687885	CADPS2, UNC13B, SLC30A1, PREPL, PFN2, LIN7C
POSTSYNAPSE_ORGANIZATION	0.431959	0.687885	INSR, MESD, PDLIM5, GPHN, ETV5, NDRG1, CRIPT, WNT5A, TIAM1, ITGA3, ADAM10, ZNF804A
GLAND_DEVELOPMENT	0.433	0.687885	PAM, MAN2A1, INSR, ARHGAP5, FBXW7, LRP6, SEC63, QDPR, BCL2, HGF, RTN4, NRG3, LMO4, JAK2, ETV5, LSR, MDK, WNT5A, ESR1, PKD2, RAF1, CCND1, ID2, SRC, SULF2
ORGANELLE_LOCALIZATION	0.434	0.687885	UNC13B, FER, RAB3D, WIPI1, TFG, AKAP9, FAM98A, TTBK2, TBC1D23, MCFD2, CLMN, RAB6A, CHMP4C, RAB3B, KLHL21, TMEM106B, SPICE1
PROTEIN_CONTAINING_COMPLEX_ASSEMBLY	0.434565	0.687885	CADPS2, PAM, UNC13B, INSR, FER, LAMC1, RDX, CARMIL1, SVIP, CPT1A, STOM, CAMSAP2, JMY, TFG, PIK3C2A, CYFIP1, AKAP9, ICE1, FCHO2, TMCC1, MCFD2, EIF3J, TBCEL, KANK1, DKK1, ATPAF1, PAK1, RTN4, NRG3, PFN2, BCL9, KAT6B, SH3GLB1, FNIP2, LMO4, CHP1, LRRC8A, JAK2, NDUFS4, KLHL21, NDUFAF2, SMARCA5, CLIP1, NDUFB4, LUC7L2, NDUFC2, FMN1, ESR1, AASS, TIAM1, CDC73, PARD3, ALAD, PKD2, ADRB2, RAF1, SYT1, SRC, NCK…
STEROID_HORMONE_MEDIATED_SIGNALING_PATHWAY	0.435451	0.687885	RBFOX2, CLOCK, UBA5, NR1D1, PAK1, DDX5, JAK2, CRY1, ESRRG, RORA, ESR1, GRIP1
NEUROTRANSMITTER_TRANSPORT	0.435923	0.687885	CADPS2, UNC13B, SLC30A1, PREPL, SLC44A1, PFN2, LIN7C, RAB3B
POSITIVE_REGULATION_OF_IMMUNE_RESPONSE	0.437437	0.687885	YES1, IL6ST, PJA2, EIF2AK4, CYFIP1, IL12A, CCR2, BCL2, NR1D1, PELI1, PAK1, RTN4, GFI1, DENND1B, IFIH1, MAPKAPK3, MAPKAPK2, CD274, LGR4, IRF1, WNT5A, ESR1, RAF1, NFKBIZ, SRC, NCKAP1
MAINTENANCE_OF_CELL_NUMBER	0.438413	0.687885	IGF1, TET1, BCL9, JAG1, ZNF358, ZNF706, SELENON, KIT, CDC73, RAF1
IMMUNE_SYSTEM_DEVELOPMENT	0.438561	0.687885	RBFOX2, HIPK2, BMI1, FBXW7, NDFIP1, ACVR2A, TIPARP, NFE2L2, IL12A, SLC40A1, CCR2, BCL2, GFI1, JAG1, LMO4, GAS6, LRRC8A, JAK2, ETV6, KLF13, MDK, CD274, STAT1, PRXL2A, PRKCA, RORA, KIT, IRF1, WNT5A, CDC73, OSTM1, RAF1, NFKBIZ, ID2, SRC
CARBOHYDRATE_HOMEOSTASIS	0.438776	0.687885	UNC13B, INSR, ADIPOR1, ZBTB20, NR1D1, GAS6, CRY1, HMGN3, NDUFAF2, RAB11FIP5, TIAM1, RAF1
POSITIVE_REGULATION_OF_I_KAPPAB_KINASE_NF_KAPPAB_SIGNALING	0.439457	0.687885	NDFIP1, TFG, GOLT1B, MTDH, PELI1
REGULATION_OF_MULTI_ORGANISM_PROCESS	0.440559	0.687885	IGF1, ITGAV, BMP6, UNC13B, STOM, PJA2, EIF2AK4, LAMP3, IL12A, BCL2, NR1D1, PELI1, PAK1, RTN4, GFI1, DDX5, CHMP4C, JAK2, IFIH1, MAPKAPK3, MAPKAPK2, STAT1, PRKCA, LGR4, IRF1, WNT5A, ESR1
CATION_TRANSMEMBRANE_TRANSPORT	0.441	0.687885	ITGAV, STOM, TMEM38B, SLC39A8, SLC17A5, TMCO1, SLC30A1, ANO10, SLC40A1, AKAP9, CCR2, SLC31A2
MYELOID_CELL_DIFFERENTIATION	0.443662	0.689611	RBFOX2, HIPK2, FBXW7, NDFIP1, ACVR2A, JAG1, JAK2, KLF13, STAT1, PRXL2A, PRKCA, KIT, CDC73, OSTM1, ID2, SRC
ESTABLISHMENT_OF_ORGANELLE_LOCALIZATION	0.443996	0.689611	FER, WIPI1, TFG, TBC1D23, MCFD2, CLMN, RAB6A, CHMP4C, KLHL21, SPICE1
MALE_GAMETE_GENERATION	0.445473	0.689779	CRTAP, ACVR2A, CLOCK, CFAP44, ARMC2, ETV5, TAF4B, KIT, LGR4, HOOK1
GROWTH	0.446553	0.689779	IGF1, INSR, ADIPOR1, CREG1, BMPR2, VPS54, MAP3K13, TMEM38B, CDKN1A, EIF2AK4, ACVR2B, GOLGA4, CYFIP1, LRP6, PDLIM5, SELENOP, IFRD1, FAM122A, BCL2, PTCH2, SPART, PAK1, RTN4, NRG3, DHCR7, BCL9, BRMS1L, GAS6
ORGANIC_ACID_TRANSPORT	0.446939	0.689779	UNC13B, CPT1A, SLC17A5, PLA2G4A, NCOA2
REGULATION_OF_CELL_CYCLE_PHASE_TRANSITION	0.44898	0.690888	RDX, FBXW7, CDKN1A, AKAP9, BCL2, GADD45A, CHMP4C, PCBP4, CDKN2A, CDC73, PKD2, CCND1, ID2
RESPONSE_TO_BIOTIC_STIMULUS	0.44955	0.690888	BMP6, UNC13B, FER, PJA2, EIF2AK4, SLC17A5, TMCO1, IL12A, CAPN2, MTDH, BCL2, NR1D1, PELI1, PAK1, RTN4, GFI1, XPR1, ADAM9, JAK2, APOL1, IFIH1, MAPKAPK3, MAPKAPK2, CD274, STAT1, PRKCA, LGR4, IRF1, WNT5A, ESR1, IL6R, CDC73, ALAD, RAF1, SPARC, BST2, PTGS2, NCAM1, SRC, ELMOD2
CELL_CYCLE_ARREST	0.451679	0.6927	RRAGD, CDKN1A, JMY, EIF2AK4, IL12A, GADD45A, GAS6, PCBP4, CDKN2A, IRF1, PKD2, CCND1, ID2
DEVELOPMENTAL_PROCESS_INVOLVED_IN_REPRODUCTION	0.455	0.696331	IGF1, BMP6, INSR, BMPR2, CRTAP, ACVR2A, TIPARP, CLOCK, ACVR1, LRP6
POSITIVE_REGULATION_OF_JNK_CASCADE	0.457732	0.699047	HIPK2, MAP3K13, PJA2, DKK1, PAK1, GADD45A
NEGATIVE_REGULATION_OF_CELLULAR_CATABOLIC_PROCESS	0.462963	0.705559	HIPK2, SVIP, ATRAID, LAMP3, BCL2, HGF, RIC1, MAPKAPK2
RESPONSE_TO_TOXIC_SUBSTANCE	0.464464	0.706373	MGST3, TXN, USP46, PON2, CDKN1A, NFE2L2, SLC30A1, CAPN2, EPHX2, XRN1, BCL2, FECH, HGF, SESN1, EPHX1, ADAM9, GLRX2, STAT1, PRXL2A, GGH, ALAD, SPARC, CCND1, PTGS2, SRC
POSITIVE_REGULATION_OF_EPITHELIAL_CELL_MIGRATION	0.469072	0.711897	BMPR2, PIK3C2A, NFE2L2, RTN4, ADAM9, PRKCA, WNT5A, ITGA3, SPARC, PTGS2, SRC
NEURON_DEVELOPMENT	0.471528	0.714017	RBFOX2, NDNF, RAPGEF2, ABL2, BMPR2, MAP3K13, CAMSAP2, PTPRG, SCARB2, PRKCI, EIF2AK4, GOLGA4, CYFIP1, NFE2L2, PDLIM5, TBC1D23, IFRD1, CLMN, BCL2, SPART, KANK1, DKK1, HGF, RHOBTB3, PAK1, RTN4, GFI1, JAK2, S100A6, TMEM106B, BTBD3, CCDC66, MDK, PRKCA, PARP6, CNTN1, ITSN1, WNT5A, TIAM1, GRIP1, ITGA3, PARD3, SYT1, EPHA6, ID2, NCAM1, SRC, NCKAP1, ADAM10, SHC1, AHI1, ZNF804A, IMPACT, RAB10
PURINE_CONTAINING_COMPOUND_METABOLIC_PROCESS	0.473473	0.714017	IGF1, INSR, CARMIL1, ZBTB20, DPYD, FAR2
POSITIVE_REGULATION_OF_MAPK_CASCADE	0.474	0.714017	IGF1, RAPGEF2, INSR, HIPK2, MAP4K3, MAP3K13, FBXW7, PJA2, DKK1, HGF, RELL1, PAK1, GADD45A, ADAM9, GAS6, JAK2, MAPKAPK3, MAPKAPK2, PRKCA, KIT, WNT5A, TIAM1, AVPI1, ADRB2, RAF1
INTRACELLULAR_RECEPTOR_SIGNALING_PATHWAY	0.475758	0.714017	RBFOX2, CLOCK, UBA5, NR1D1, PAK1, DDX5, JAK2, CRY1, IFIH1, ESRRG, RORA, ESR1, GRIP1, STARD10, SRC, PER1, TRIM24, THRA
CELLULAR_RESPONSE_TO_STEROID_HORMONE_STIMULUS	0.475758	0.714017	RBFOX2, CLOCK, UBA5, NR1D1, FECH, PAK1, DDX5, JAK2, CRY1, ESRRG, RORA, ESR1, GRIP1
SMOOTH_MUSCLE_CELL_PROLIFERATION	0.476337	0.714017	IGF1, NAA35, CDKN1A, IL12A, PAK1, JAK2, CALCRL, STAT1, IL6R, ID2, PTGS2
MUSCLE_CELL_PROLIFERATION	0.479592	0.71734	IGF1, NAA35, CDKN1A, IL12A, PAK1, JAK2, CALCRL, STAT1, SELENON, IL6R, ID2, PTGS2
CIRCULATORY_SYSTEM_DEVELOPMENT	0.480519	0.71734	IGF1, ITGAV, PAM, NDNF, RAPGEF2, INSR, HIPK2, BMPR2, FBXW7, CDKN1A, TIPARP, ACVR1, PIK3C2A, ACVR2B, NFE2L2, LRP6, CCR2, PDLIM5, MTDH
MUSCLE_CELL_DIFFERENTIATION	0.482966	0.719521	IGF1, ACVR1, CAPN2, PDLIM5, IFRD1, CFL2, BCL2, DKK1, PAK1, SORT1, BCL9, ITGA8, CSRP1, SELENON, RORA, KIT
REGULATION_OF_IMMUNE_RESPONSE	0.488511	0.7263	FER, YES1, IL6ST, NDFIP1, PJA2, EIF2AK4, CYFIP1, IL12A, CCR2, BCL2, NR1D1, PELI1, PAK1, RTN4, GFI1, DENND1B, JAK2, IFIH1, MAPKAPK3, MAPKAPK2, CD274, STAT1, KIT, LGR4, IRF1, WNT5A, ESR1, RAF1, NFKBIZ, BST2, SRC, NCKAP1, SHC1, DUSP22
NEGATIVE_REGULATION_OF_ESTABLISHMENT_OF_PROTEIN_LOCALIZATION	0.490605	0.727766	SVIP, TXN, NDFIP1, GAS6, CHP1, NDUFAF2, RAB11FIP5, LGR4, BMP8A, ACVR1C, YOD1
ACTIVATION_OF_IMMUNE_RESPONSE	0.491491	0.727766	YES1, PJA2, CYFIP1, BCL2, NR1D1, PELI1, PAK1, RTN4, GFI1, DENND1B, IFIH1, MAPKAPK3, MAPKAPK2, LGR4, IRF1, ESR1, RAF1, NFKBIZ, SRC, NCKAP1
ENDOTHELIAL_CELL_MIGRATION	0.492798	0.728224	BMPR2, FBXW7, PIK3C2A, NFE2L2
RESPONSE_TO_XENOBIOTIC_STIMULUS	0.495885	0.73	MGST3, TMEM38B, TIPARP, EPHX2, FECH, EPHX1, SELENON, RORA, TIAM1
POSITIVE_REGULATION_OF_CELL_DEATH	0.496	0.73	RAPGEF2, UNC13B, FBXW7, PRKCI, CDKN1A, JMY, FAM162A, IL12A, CAPN2, NCSTN, KLF11, ARHGEF12, BCL2, DKK1, SORT1, GADD45A, JAK2, ATF6, FGD4, CD274, CDKN2A, ITSN1, WNT5A, TIAM1, CIDEB, PTGS2, ARHGEF3, SRC, ADAM10, EIF2S1, PSENEN, ACVR1C, FRZB, RYBP
POSITIVE_REGULATION_OF_MULTI_ORGANISM_PROCESS	0.497996	0.730695	BMP6, UNC13B, STOM, PJA2, IL12A, NR1D1, PELI1, PAK1, RTN4, GFI1, CHMP4C, IFIH1, MAPKAPK3, MAPKAPK2, PRKCA, LGR4, IRF1, WNT5A, ESR1
RESPONSE_TO_HYDROGEN_PEROXIDE	0.501044	0.730695	TXN, NFE2L2, CAPN2, BCL2, HGF, ADAM9, GLRX2, STAT1
RESPONSE_TO_ABIOTIC_STIMULUS	0.501499	0.730695	IGF1, PAM, BMP6, NDNF, HIPK2, MAP4K3, TXN, CPEB2, CDKN1A, CLOCK, FAM162A, EIF2AK4, CYFIP1, NFE2L2, IL12A, AKAP9, CAPN2, CPEB4, BCL2, FECH, PAK1, F11R, GADD45A, CHP1, LRRC8A, CRY1, NDRG1, MAPKAPK2, FOXP2, CCDC66, MDK, GLRX2, STAT1, RAB11FIP5, RORA, KIT, TMEM135, IRF1, HABP4, ALAD, PKD2, ADRB2, RAF1, SPARC, CCND1, ID2, PTGS2, SRC, SWI5, MYOF, GMPR, EPAS1, IMPACT, EIF2S1, MBIP, PER1
CELL_CYCLE_PHASE_TRANSITION	0.503006	0.730695	RDX, FBXW7, CDKN1A, ACVR1, AKAP9, KLF11, BCL2, GFI1, GADD45A, CHMP4C, PCBP4, CDKN2A, CDC73, CDK14, PKD2, PPP1R12B, CCND1, ID2
PROTEIN_MODIFICATION_BY_SMALL_PROTEIN_CONJUGATION	0.504496	0.730695	RNF148, BMI1, RNF133, FBXW7, NDFIP1, RNF11, PJA2, PDZRN4, UBA5, NFE2L2, FEM1C, UBR3, SEL1L, BCL2, UBE2QL1, PELI1
CARDIAC_MUSCLE_TISSUE_DEVELOPMENT	0.506173	0.730695	IGF1, ACVR1, PDLIM5, DKK1, PAK1
NEURON_DIFFERENTIATION	0.506494	0.730695	RBFOX2, BMP6, NDNF, RAPGEF2, HIPK2, ABL2, BMPR2, MAP3K13, CAMSAP2, PTPRG, SCARB2, PRKCI, EIF2AK4, GOLGA4, CYFIP1, NFE2L2, LRP6, PDLIM5, TBC1D23, IFRD1, CLMN, BCL2, CYB5D2, SPART, KANK1, DKK1, HGF, RHOBTB3, PAK1, RTN4, GFI1, JAG1, LMO4, JAK2, ETV5, S100A6, TMEM106B, BTBD3, CCDC66, MDK, PRKCA, PARP6, RORA, CNTN1, ITSN1, WNT5A, TIAM1, GRIP1, ITGA3, PARD3, SYT1, EPHA6, ID2, NCAM1, SRC, NCKAP1, ADAM10…
NOTCH_SIGNALING_PATHWAY	0.507071	0.730695	IL6ST, FBXW7, PRKCI, SEL1L, NCSTN, JAG1, MDK, PERP, STAT1, KIT, CNTN1, ADAM10, PSENEN, SYNJ2BP, IFT74, NEPRO
RESPONSE_TO_ANTIBIOTIC	0.508016	0.730695	TXN, USP46, PLA2G4A, NFE2L2, CAPN2, XRN1, BCL2, FECH, HGF, FDX1, ADAM9, JAK2, GLRX2, STAT1, GGH, ALAD, SPARC, CCND1, SRC
ANIMAL_ORGAN_MORPHOGENESIS	0.508492	0.730695	MLLT3, PAM, BMP6, MAN2A1, INSR, HIPK2, LAMC1, BMPR2, FBXW7, PRKCI, TIPARP, ACVR1, TUFT1, ACVR2B, LRP6, SLC40A1
MUSCLE_TISSUE_DEVELOPMENT	0.509018	0.730695	IGF1, TIPARP, ACVR1, PDLIM5, IFRD1, CFL2, BCL2, DKK1, PAK1, DDX5, BCL9, ITGA8, FOXP2, CSRP1, SELENON
REGULATION_OF_TRANSPORTER_ACTIVITY	0.509664	0.730695	STOM, NDFIP1, AKAP9, CCR2, BCL2, SLMAP, CHP1, GPD1L, SELENON, FXYD5, PKD2, ADRB2
NEGATIVE_REGULATION_OF_IMMUNE_SYSTEM_PROCESS	0.51006	0.730695	FER, FBXW7, NDFIP1, NFE2L2, CCR2, NR1D1, PELI1, KLF13, MDK, CD274, LGR4, IRF1, CDC73, ID2, BST2
GAMETE_GENERATION	0.511022	0.730695	IGF1, CRTAP, ACVR2A, CLOCK, ACVR1, BCL2, CFAP44, ARMC2, ETV5, TAF4B, ETV6, MDK, KIT, LGR4, HOOK1
FORMATION_OF_PRIMARY_GERM_LAYER	0.512371	0.730695	ITGAV, BMPR2, ACVR1, DKK1, ITGA8, WNT5A, CDC73, ITGA3
CELL_CYCLE_PROCESS	0.512488	0.730695	IGF1, CSPP1, INSR, BMI1, RDX, RRAGD, PKP4, FBXW7, CDKN1A, JMY, ACVR1, EIF2AK4, IL12A, AKAP9, KLF11, BCL2, SNX18, STAG1, GFI1, CCSAP, GADD45A, SH3GLB1, CHMP4C, GAS6, KLHL21, SPICE1, PRKCA, PCBP4, CDKN2A, IRF1, WNT5A, CDC73, CDK14, PKD2, PPP1R12B, CCND1, ID2, STARD9, KLHL9
PHOSPHOLIPID_METABOLIC_PROCESS	0.514544	0.731066	PIP5K1B, TMEM38B, PIK3C2A, PLA2G4A, FITM2, CAPN2, SPTLC1, SLC44A1, SRD5A3, GPD1L, INPP1, FAM126B, DOLK, KIT, STARD10, MBOAT1, SRC, PIGM, SOCS7, CISH, FGF2, SOCS2
ACTIVATION_OF_INNATE_IMMUNE_RESPONSE	0.514751	0.731066	PJA2, NR1D1, PELI1, PAK1, RTN4, GFI1, IFIH1, MAPKAPK3, MAPKAPK2, LGR4, IRF1, ESR1, RAF1, SRC
ESTABLISHMENT_OR_MAINTENANCE_OF_CELL_POLARITY	0.51821	0.733775	MPP5, DST, PRKCI, KANK1, RHOBTB3, PAK1, LIN7C, WNT5A, RND3, PARD3
CELLULAR_RESPONSE_TO_ABIOTIC_STIMULUS	0.518668	0.733775	BMP6, CDKN1A, CLOCK, EIF2AK4, F11R, GADD45A, CHP1, CRY1, RAB11FIP5, IRF1, HABP4, PKD2, PTGS2, SWI5, IMPACT, EIF2S1, MBIP
RENAL_SYSTEM_DEVELOPMENT	0.52004	0.734287	BMP6, TIPARP, ACVR2B, BCL2, ITGA8, JAG1, STAT1, LGR4, WNT5A, FMN1, IL6R, ITGA3, PKD2, ID2, AHI1, SULF2
REGULATION_OF_MAP_KINASE_ACTIVITY	0.521042	0.734287	IGF1, INSR, MAP4K3, MAP3K13, DKK1, HGF, PAK1, GADD45A, ADAM9, JAK2, MAPKAPK3, MAPKAPK2, KIT, WNT5A, TIAM1, AVPI1, RAF1, SRC, SHC1
NEGATIVE_REGULATION_OF_TRANSPORT	0.52505	0.73803	ITGAV, SVIP, TXN, NDFIP1, CYFIP1, SLC30A1, SCAMP5, CCR2, BCL2, GAS6, CHP1, CRY1, NDUFAF2, RAB11FIP5, LGR4, PKD2, BST2, PTGS2, BMP8A, ACVR1C, YOD1, SRI, SLC35F6
ORGANELLE_FISSION	0.52572	0.73803	IGF1, INSR, STAG1, CCSAP, CHMP4C, SPICE1, TMEM135, WNT5A
POSITIVE_REGULATION_OF_SYNAPTIC_TRANSMISSION	0.530271	0.742505	UNC13B, EIF2AK4, CCR2, NCSTN, RAB3B, ADRB2, SYT1, PTGS2
SULFUR_COMPOUND_BIOSYNTHETIC_PROCESS	0.531959	0.742505	ST3GAL6, MGST3, NFE2L2
RESPONSE_TO_ORGANIC_CYCLIC_COMPOUND	0.534466	0.74458	RBFOX2, PAM, BMP6, RAPGEF2, CPT1A, TMEM38B, CDKN1A, TIPARP, CLOCK, UBA5, LRP6, AKAP9, NCOA2, NCSTN, XRN1, BCL2, NR1D1, FECH, PELI1, PAK1, DDX5, FDX1, EPHX1, ADAM9, JAK2, CRY1, NDUFS4, IFIH1, FOXP2, MDK, STAT1, ESRRG, SELENON, RORA, ESR1, TIAM1, GRIP1, ALAD, PKD2, SPARC, CCND1, PTGS2, SRC
PROTEIN_DEPHOSPHORYLATION	0.536534	0.745908	PTPRG, PPA2, FAM122A, BCL2, DUSP26, JAK2
TUBE_MORPHOGENESIS	0.537463	0.745908	ITGAV, NDNF, RAPGEF2, HIPK2, BMPR2, FBXW7, TIPARP, ACVR1, PIK3C2A, ACVR2B, NFE2L2, LRP6, CCR2, MTDH, BCL2, HGF, PAK1, JAG1, LMO4, ETV5, CALCRL, MDK, STAT1, PRKCA, RORA, LGR4, WNT5A, FMN1, ESR1, PKD2, SPARC, ID2, PTGS2, SRC, SHC1, AHI1
NEGATIVE_REGULATION_OF_PROTEIN_MODIFICATION_PROCESS	0.539078	0.746731	OXR1, CRTAP, TMEM59, CDKN1A, LRP6, DEPTOR, CORO1C, FAM122A, DKK1, HGF, DUSP26, GADD45A, CHP1, CRY1, GPD1L
GLAND_MORPHOGENESIS	0.545361	0.754003	FBXW7, LRP6, BCL2, HGF, NRG3, ETV5, MDK, WNT5A, ESR1, SRC, SULF2
NERVOUS_SYSTEM_PROCESS	0.547453	0.755464	RBFOX2, CRYBG3, UNC13B, INSR, MYO6, ATXN1, PJA2, EIF2AK4, CYFIP1, UBA5, UBR3, AKAP9, CCR2, NCSTN, SPART, DKK1, HGF
MUSCLE_CELL_DEVELOPMENT	0.552577	0.761006	IGF1, PDLIM5, CFL2, BCL2, PAK1, CSRP1, SELENON
CHROMATIN_ORGANIZATION	0.553554	0.761006	BMI1, TET1, CLOCK, USP3, PRDM5, BAZ2B, TLK1, RIOX2, PAK1, GFI1, KAT6B, BRMS1L, JAK2, HMGN3, PRKCA, SMARCA5, CDKN2A, ESR1, EID1, CDC73, C6orf89
REGULATION_OF_PROTEIN_BINDING	0.555671	0.762481	RAPGEF2, HIPK2, TTBK2, BCL2, DKK1, PLCL1, WNT5A, TIAM1, ADRB2, SRC, EIF2S1
DIGESTIVE_SYSTEM_DEVELOPMENT	0.557411	0.763358	INSR, CDKN1A, ACVR2B, BCL2, KIT, LGR4, WNT5A, ID2, AHI1
MITOCHONDRIAL_TRANSPORT	0.558402	0.763358	CPT1A, FBXW7, BCL2, SLC25A36, SLC25A16, SH3GLB1, TOMM70
MULTICELLULAR_ORGANISM_REPRODUCTION	0.561122	0.765643	IGF1, PAM, BMPR2, CRTAP, ACVR2A, CLOCK, ACVR1, BCL2, CFAP44, ARMC2, ETV5, TAF4B, ETV6, MDK, KIT, LGR4, HOOK1, ESR1, ITGA3, PTGS2, SRC, ADAM10
REPRODUCTIVE_SYSTEM_DEVELOPMENT	0.562563	0.765938	BMP6, INSR, BMPR2, ACVR2A, TIPARP, LRP6, BCL2, RHOBTB3, KIT, LGR4, WNT5A, ESR1, PKD2, CCND1, PTGS2, SRC
SIGNAL_TRANSDUCTION_BY_PROTEIN_PHOSPHORYLATION	0.563437	0.765938	IGF1, ITGAV, BMP6, RAPGEF2, INSR, HIPK2, MAP4K3, MAP3K13, FBXW7, PJA2, BMP8B, DKK1, HGF, RELL1, PAK1, DUSP26, GADD45A, MAGI3, ADAM9, GAS6, JAK2, MAPKAPK3, IL5RA, MAPKAPK2, PRKCA, KIT, WNT5A, TIAM1, AVPI1, ADRB2, RAF1, RNF149, NCAM1, SRC, BMP8A, SHC1, DUSP22, MBIP, PER1, SYNJ2BP, ANKRD6, VRK2
NUCLEAR_TRANSPORT	0.564948	0.766157	ATXN1, TXN, CDKN1A
UROGENITAL_SYSTEM_DEVELOPMENT	0.565697	0.766157	BMP6, TIPARP, ACVR2B, BCL2, ITGA8, JAG1, STAT1, LGR4, WNT5A, FMN1, ESR1, IL6R, ITGA3, PKD2, ID2, AHI1, SULF2
REGULATION_OF_LIPID_METABOLIC_PROCESS	0.568706	0.767968	BMP6, ADIPOR1, CPT1A, FBXW7, ZBTB20, FITM2, CAPN2, NCOA2, EPHX2, NR1D1, GFI1, DHCR7, GRHL1, LSR, RORA, KIT, PDP2, ID2, PTGS2, SRC, THRA, SOCS7, CISH, FGF2, SOCS2
NEGATIVE_REGULATION_OF_CELL_ADHESION	0.569138	0.767968	BMP6, RDX, NDFIP1, CORO1C, KANK1, PELI1, JAG1, JAK2, MDK, CD274, CDKN2A, IRF1, FXYD5
COGNITION	0.570423	0.768281	INSR, ATXN1, PJA2, EIF2AK4, CYFIP1, NCSTN, DKK1, ITGA8, FOXP2, MDK, KIT
REGULATION_OF_CYTOSOLIC_CALCIUM_ION_CONCENTRATION	0.572149	0.769188	ITGAV, ABL2, TMEM38B, LRP6, CCR2, BCL2, PLCL1, JAK2, SELENON, WNT5A, ESR1, PKD2
REGULATION_OF_MAPK_CASCADE	0.573427	0.769488	IGF1, BMP6, RAPGEF2, INSR, HIPK2, MAP4K3, MAP3K13, FBXW7, PJA2, BMP8B, DKK1, HGF, RELL1, PAK1, DUSP26, GADD45A, MAGI3, ADAM9, GAS6, JAK2, MAPKAPK3, MAPKAPK2, PRKCA, KIT, WNT5A, TIAM1, AVPI1, ADRB2, RAF1, RNF149, SRC, BMP8A, SHC1, DUSP22, MBIP, PER1, SYNJ2BP, ANKRD6, VRK2
PROTEIN_MODIFICATION_BY_SMALL_PROTEIN_CONJUGATION_OR_REMOVAL	0.575425	0.770752	RNF148, BMI1, RNF133, FBXW7, NDFIP1, USP46, RNF11, PJA2, PDZRN4, UBA5, NFE2L2, FEM1C, UBR3, USP3, SEL1L, BCL2, UBE2QL1, PELI1, OTUD7B, CHP1, MINDY2, CRY1, KLHL21, IFIH1
NEGATIVE_REGULATION_OF_INTRACELLULAR_SIGNAL_TRANSDUCTION	0.577578	0.772219	ADIPOR1, ABL2, ARHGAP42, NFE2L2, DEPTOR, BCL2, NR1D1, KANK1, DUSP26, SESN1, TMEM127, OTUD7B, FNIP2, CHP1, GPD1L, STAT1, RORA, ESR1, ITGA3, PKD2, RNF149, PTGS2, SRC, RCAN1, NPRL2, HOMER3, MBIP, PER1, SYNJ2BP
REGULATION_OF_VASCULATURE_DEVELOPMENT	0.584754	0.780385	RAPGEF2, HIPK2, FBXW7, PIK3C2A, NFE2L2, CCR2, MTDH, HGF, MDK, STAT1, PRKCA, KIT, WNT5A, IL6R, SPARC, PTGS2, ADAM10
RESPONSE_TO_CARBOHYDRATE	0.587996	0.780403	UNC13B, ZBTB20, ACVR2B, NR1D1, GAS6, CALCRL, HMGN3, NDUFAF2, RAB11FIP5, TIAM1, RAF1, SPARC, PTGS2
ADAPTIVE_THERMOGENESIS	0.590722	0.780403	ADIPOR1, ACVR2B, CCR2, NR1D1, PLCL1, JAK2, TSHR, ESRRG, LGR4, ADRB2, BMP8A, EPAS1, THRA, LEPR, MC4R
TISSUE_REMODELING	0.590909	0.780403	BMPR2, RAB3D, ACVR2B, LRP6, CCR2, SUCO, JAG1, DDR2, MDK, PRKCA, LGR4
DENDRITE_DEVELOPMENT	0.590909	0.780403	RBFOX2, RAPGEF2, CAMSAP2, CYFIP1, PDLIM5, TMEM106B, BTBD3, PARP6, ITSN1, TIAM1, GRIP1
SENSORY_ORGAN_MORPHOGENESIS	0.590909	0.780403	MAN2A1, HIPK2, PRKCI, LRP6, BCL2, ITGA8, JAG1
COVALENT_CHROMATIN_MODIFICATION	0.591182	0.780403	BMI1, TET1, CLOCK, USP3, PRDM5, RIOX2, GFI1, KAT6B, BRMS1L, JAK2, PRKCA, EID1, CDC73, C6orf89, SUPT7L, MBIP, PER1, RYBP
REGULATION_OF_CELL_SUBSTRATE_ADHESION	0.593878	0.781736	NDNF, CARMIL1, CORO1C, BCL2, KANK1, JAG1, JAK2, MDK, CDKN2A, FMN1, ITGA3, SRC, DUSP22
NEGATIVE_REGULATION_OF_PHOSPHORYLATION	0.59519	0.781736	CDKN1A, LRP6, DEPTOR, CORO1C, DKK1, HGF, DUSP26, GADD45A, CHP1, GPD1L, CDKN2A, PARD3, RNF149, NPRL2, DUSP22, IMPACT, MBIP, PER1, SYNJ2BP
MEMBRANE_ORGANIZATION	0.595405	0.781736	MPP5, SCARB2, PRKCI, TFG, MESD, PIK3C2A, FCHO2, CORO1C, TMCC1, MCFD2, BCL2, SNX18, RHOBTB3, GPHN, RTN4, SH3GLB1, CHMP4C, GAS6, CHP1, ETV5, KLHL21, NDRG1, PRKCA, CLIP1, ITSN1, CRIPT, WNT5A
REGULATION_OF_EPITHELIAL_CELL_DIFFERENTIATION	0.598121	0.783893	BMP6, CLOCK, PTCH2, F11R, JAG1, GRHL1, STAT1
REGULATION_OF_MORPHOGENESIS_OF_AN_EPITHELIUM	0.60529	0.791867	MLLT3, DKK1, HGF, PRICKLE2, ETV5, MDK, STAT1, LGR4, WNT5A, ESR1, TIAM1
POSITIVE_REGULATION_OF_NUCLEOBASE_CONTAINING_COMPOUND_METABOLIC_PROCESS	0.606394	0.791891	IGF1, MLLT3, BMP6, INSR, HIPK2, YES1, MYO6, HNRNPLL, TET1, BMPR2, NFIL3, FBXW7, ZBTB20, JMY, ACVR2A, CLOCK, ACVR1, STAT4, NFE2L2, LRP6, SLC40A1, ICE1, NCOA2, MTDH, CNBP, ZBTB38, NR1D1, HGF, ARID3B, GFI1, DDX5, BCL9, KAT6B, ITGA8, JAG1, LMO4, ETV5, NFE2L3, TAF4B, ETV6, GRHL1, ATF6, HMGN3, KLF13, MDK, STAT1, ESRRG, SMARCA5, RORA, LGR4, IRF1, WNT5A, ESR1, HABP4, GRIP1, CDC73, PKD2, ADRB2, ZNF609, RA…
ORGANELLE_ASSEMBLY	0.611	0.796482	RDX, WIPI1, C5orf30, TBC1D12, MAP1LC3B2, AKAP9, GABARAPL1, TTBK2, CFL2, TMEM107, STAG1, CCSAP, CFAP44, ARMC2, SH3GLB1, CHMP4C, SPICE1, CCDC66, CSRP1, TBC1D30
MORPHOGENESIS_OF_A_BRANCHING_STRUCTURE	0.615694	0.801171	MAP3K13, ACVR1, LRP6, BCL2, HGF, PAK1, RTN4, ETV5, MDK, LGR4, WNT5A, ESR1, PKD2, SRC
NEURON_MIGRATION	0.617954	0.802117	NDNF, RAPGEF2, NAV1, NRG3, GAS6, MDK, ITGA3, ZNF609
SYNAPSE_ORGANIZATION	0.618619	0.802117	LRRN1, UNC13B, INSR, CAST, MESD, CYFIP1, PDLIM5, DKK1, GPHN, PFN2, ETV5, NDRG1, ITSN1, CRIPT, WNT5A, TIAM1, CNTN5, ITGA3, SPARC
CELL_MORPHOGENESIS_INVOLVED_IN_NEURON_DIFFERENTIATION	0.62	0.802482	RBFOX2, RAPGEF2, BMPR2, MAP3K13, GOLGA4, CYFIP1, PDLIM5, IFRD1, BCL2, SPART, RHOBTB3, PAK1, RTN4, S100A6, TMEM106B, BTBD3, PRKCA, PARP6, WNT5A, TIAM1, PARD3, EPHA6, ID2, NCAM1, SRC, ADAM10, SHC1
TEMPERATURE_HOMEOSTASIS	0.625773	0.808521	ADIPOR1, ACVR2B, CCR2, NR1D1, PLCL1, JAK2, TSHR, ESRRG, LGR4, ADRB2, PTGS2, EPAS1
CELLULAR_RESPONSE_TO_ORGANIC_CYCLIC_COMPOUND	0.628	0.809965	RBFOX2, RAPGEF2, TMEM38B, TIPARP, CLOCK, UBA5, LRP6, AKAP9, NCSTN, XRN1, NR1D1, FECH, PAK1, DDX5, FDX1, JAK2, CRY1, IFIH1, STAT1, ESRRG, SELENON, RORA, ESR1, GRIP1, PKD2
ESTABLISHMENT_OF_LOCALIZATION_IN_CELL	0.635271	0.817897	TMEM38B, WIPI1, TFG, TBC1D23, MCFD2, BCL2, NR1D1, PLCL1, CHMP4C, KLHL21, HMGN3, NDUFAF2, SPICE1, SELENON, RAB11FIP5, TIAM1, PARD3, PKD2, RAF1
CELLULAR_RESPONSE_TO_INORGANIC_SUBSTANCE	0.641962	0.825057	BMP6, SLC40A1, NCSTN, WNT5A, ALAD, PKD2, SYT1, ID2, PTGS2, EIF2S1, XRCC4, ENDOG
NEGATIVE_REGULATION_OF_HYDROLASE_ACTIVITY	0.644935	0.827421	RDX, CAST, CPEB2, LAMP3, FAM122A, HGF, SORT1, F11R, GAS6, CHP1
ORGANIC_ACID_CATABOLIC_PROCESS	0.646881	0.828462	AIG1, CPT1A, AUH, ETFDH, QDPR, ALDH3A2
MAINTENANCE_OF_LOCATION	0.64995	0.830589	ITGAV, TXN, FBXW7, TMEM38B, FITM2, AKAP9, CLMN
RESPONSE_TO_TRANSFORMING_GROWTH_FACTOR_BETA	0.650858	0.830589	ZFYVE9, HIPK2, YES1, ACVR1, F11R, ITGA8, ADAM9, LTBP1, WNT5A, ITGA3, PARD3, SRC, DUSP22
CELLULAR_RESPONSE_TO_DRUG	0.651956	0.830589	TXN, TMEM38B, NFE2L2, NCSTN, QDPR, XRN1, FECH, HGF, FDX1, GAS6
BIOLOGICAL_ADHESION	0.654346	0.832182	IGF1, ITGAV, BMP6, NDNF, FER, YES1, ARHGAP5, LAMC1, ABL2, RDX, IL6ST, CARMIL1, PKP4, DST, NDFIP1, ACVR1, LRP6, IL12A, CCR2, PDLIM5, CORO1C, BCL2, KANK1, PELI1, PAK1, DUSP26, LSAMP, F11R, ITGA8, JAG1, ADAM9, GAS6, JAK2, DDR2, MDK, CSRP1, CD274, PERP, PRKCA, KIT, CNTN1, CDKN2A, IRF1, WNT5A, FXYD5, FMN1, TIAM1, CNTN5, RND3, ITGA3, PARD3
ION_TRANSMEMBRANE_TRANSPORT	0.657343	0.834539	ITGAV, CPT1A, STOM, TMEM38B, SLC39A8, SLC17A5, TMCO1, SLC30A1, ANO10, SLC40A1, AKAP9, CCR2, SLC31A2, PLCL1, SLMAP, XPR1, GAS6, CHP1, LRRC8A, APOL1, S100A6, GPD1L, SELENON, KCNN3, ANO5, FXYD5, SLC25A20, SLC30A5, OSTM1, PKD2, ADRB2, SGK3, RAF1, GABRR2
CELL_MATRIX_ADHESION	0.660204	0.836702	ITGAV, CORO1C, BCL2, ITGA8, JAG1, ADAM9, CDKN2A, FMN1, TIAM1, ITGA3, SRC, DUSP22, PPFIA1
REPRODUCTION	0.661339	0.836702	IGF1, PAM, BMP6, UNC13B, INSR, BMPR2, CRTAP, ACVR2A, TIPARP, CLOCK, ACVR1, LRP6, CAPN2, SELENOP
GLIOGENESIS	0.66499	0.839866	MPP5, IL6ST, PRKCI, CCR2, NCSTN, NR1D1, RTN4, ETV5, NDRG1, MDK
STEM_CELL_DIFFERENTIATION	0.668041	0.84	ACVR1, NFE2L2, LRP6, CORO1C, JAG1, KIT, ESR1
REGULATION_OF_CHEMOTAXIS	0.668054	0.84	BMPR2, IL12A, CCR2, GAS6, MDK, WNT5A, TIAM1, IL6R
DIVALENT_INORGANIC_CATION_TRANSPORT	0.67001	0.84	ITGAV, TMEM38B, SLC39A8, TMCO1, SLC30A1, SLC40A1, BCL2, PLCL1, GAS6, CALCRL
CELL_PART_MORPHOGENESIS	0.671329	0.84	RBFOX2, RAPGEF2, BMPR2, MAP3K13, EIF2AK4, GOLGA4, CYFIP1, PDLIM5, CORO1C, IFRD1, BCL2, SPART, KANK1, RHOBTB3, PAK1, RTN4, S100A6, TMEM106B, BTBD3, MDK, PRKCA, PARP6, WNT5A, TIAM1, GRIP1, PARD3, SYT1, EPHA6, NCAM1, SRC, NCKAP1, ADAM10, SHC1, IMPACT, RAB10
SEXUAL_REPRODUCTION	0.672	0.84	IGF1, UNC13B, CRTAP, ACVR2A, CLOCK, ACVR1, SELENOP, BCL2, CFAP44, ARMC2, ETV5, TAF4B, ETV6, MDK, GNPDA1, KIT, LGR4, HOOK1
RESPONSE_TO_WOUNDING	0.672	0.84	IGF1, NDNF, CARMIL1, DST, CDKN1A, NFE2L2, CCR2, IFRD1, AK3, BCL2, KANK1, PAK1, F11R, BCL9, GAS6, JAK2, MDK, CSRP1, PRKCA, SELENON, IRF1, WNT5A, C6orf89, RAF1, SPARC, SRC, SULF2, MYOF
CELL_CYCLE_CHECKPOINT	0.673257	0.840133	CDKN1A, CLOCK, EIF2AK4, GADD45A, CHMP4C, CRY1, PCBP4
ORGANOPHOSPHATE_BIOSYNTHETIC_PROCESS	0.676	0.840921	PIP5K1B, TMEM38B, PIK3C2A, PLA2G4A, FITM2, CAPN2, SPTLC1, AK3, SLC44A1, TK2, GPHN, UCK2, PLCL1, SRD5A3, DCTD, GPD1L, GK5, NADK2, DOLK, STARD10, PDP2, MBOAT1, ELOVL7, PTGS2, PIGM, SUCLG1
HEPATICOBILIARY_SYSTEM_DEVELOPMENT	0.676379	0.840921	MAN2A1, FBXW7, SEC63, QDPR, HGF, LSR, MDK, PKD2, CCND1, SULF2, FRZB
MITOTIC_CELL_CYCLE	0.678	0.840921	IGF1, INSR, FER, RDX, CDKN1A, ACVR1, USP3, AKAP9, PRDM5, KLF11, BCL2, SNX18, STAG1, HGF, GFI1, CCSAP, GADD45A, CHMP4C, SPICE1, PRKCA, PCBP4, CLIP1, CDKN2A, CDC73, CDK14, PKD2, PPP1R12B, CCND1, ID2
GLIAL_CELL_DIFFERENTIATION	0.678497	0.840921	MPP5, IL6ST, NCSTN, NR1D1, NDRG1, MDK, PARD3, ID2
GLYCEROPHOSPHOLIPID_METABOLIC_PROCESS	0.685714	0.848426	PIP5K1B, PIK3C2A, PLA2G4A, CAPN2, SLC44A1, GPD1L, INPP1, FAM126B, STARD10, MBOAT1, PIGM, SOCS7, CISH, FGF2, SOCS2
CHROMOSOME_ORGANIZATION	0.692	0.853499	BMI1, TET1, FBXW7, CLOCK, USP3, PRDM5, BAZ2B, XRN1, TLK1, RIOX2, STAG1, PAK1, GFI1, KAT6B, BRMS1L, CHMP4C, JAK2, PURA, HMGN3, PRKCA, ASCC3, SMARCA5, CDKN2A, ESR1, HELB, EID1, CDC73, C6orf89
RESPONSE_TO_REACTIVE_OXYGEN_SPECIES	0.692153	0.853499	FER, TXN, NFE2L2, CAPN2, BCL2, HGF, SESN1, ADAM9, GLRX2, STAT1
NEGATIVE_REGULATION_OF_SECRETION	0.694154	0.854524	SLC30A1, CCR2, GAS6, CRY1, NDUFAF2, RAB11FIP5, LGR4
CENTRAL_NERVOUS_SYSTEM_DEVELOPMENT	0.696304	0.855048	RBFOX2, PAM, RAPGEF2, BTD, IL6ST, ATXN1, BMPR2, PTPRG, LRP6, SELENOP, NCSTN, TTBK2, TBC1D23, ALDH3A2, BCL2, NR1D1, DKK1, PAK1, RTN4, NRG3, ITGA8, LMO4
CATION_TRANSPORT	0.697303	0.855048	ITGAV, STOM, NDFIP1, TMEM38B, SLC39A8, SLC17A5, COMMD3, TMCO1, SLC30A1, ANO10, SLC40A1, AKAP9, CCR2, SLC31A2, SLC44A1, BCL2, PLCL1, SLMAP, GAS6, CHP1, RAB3B, CALCRL, GPD1L, SELENON, KCNN3, CNTN1, FXYD5, SLC25A20, SLC30A5, PKD2, ADRB2, SYT1, SLC48A1, PTGS2
LEUKOCYTE_MIGRATION	0.698094	0.855048	ITGAV, FER, YES1, IL12A, CCR2, F11R, GAS6, MDK, KIT, WNT5A, IL6R, ITGA3, SRC, ADAM10, SHC1
REGULATION_OF_CELL_DIVISION	0.702505	0.85901	CSPP1, PKP4, SH3GLB1, CHMP4C, KLHL21, MDK
DEFENSE_RESPONSE_TO_OTHER_ORGANISM	0.704	0.859163	UNC13B, PJA2, EIF2AK4, IL12A, BCL2, NR1D1, PELI1, PAK1, RTN4, GFI1, JAK2, APOL1, IFIH1, MAPKAPK3, MAPKAPK2, STAT1, LGR4, IRF1, WNT5A, ESR1, IL6R, RAF1, BST2, NCAM1, SRC, ELMOD2, SHC1
REGULATION_OF_PEPTIDASE_ACTIVITY	0.704985	0.859163	CAST, FAM162A, LAMP3, HGF, GAS6, JAK2, PERP, RAF1, CIDEB, BST2, PTGS2, SRC
RESPONSE_TO_OXIDATIVE_STRESS	0.709	0.860814	OXR1, FER, TXN, CPEB2, FBXW7, PON2, NFE2L2, CAPN2, ETFDH, SELENOP, BCL2, HGF, SESN1, ADAM9, JAK2, ETV5, NUDT2, GLRX2, STAT1, SELENON, NDUFB4
RESPONSE_TO_VIRUS	0.709677	0.860814	EIF2AK4, IL12A, BCL2, XPR1, IFIH1, STAT1, IRF1, BST2, SRC, ELMOD2, POLR3B, IFITM1, ABCE1, RELA, DDIT4
NEGATIVE_REGULATION_OF_CELL_CYCLE_PROCESS	0.709877	0.860814	BMI1, CDKN1A, BCL2, GADD45A, CHMP4C, PCBP4, CDKN2A, CDC73, PKD2, CCND1, RYBP, CDC14B, E2F6
RESPONSE_TO_EXTRACELLULAR_STIMULUS	0.713	0.863167	CADPS2, BMPR2, RRAGD, CDKN1A, WIPI1, EIF2AK4, NFE2L2, MAP1LC3B2, GABARAPL1, CPEB4, BCL2, SESN1, SH3GLB1, XPR1, GAS6, GLRX2, STAT1, TMEM135, ALAD, ADRB2, SPARC, CCND1, PTGS2, SRC, BMP8A, NPRL2, IMPACT, EIF2S1, TRIM24, ACVR1C, SLC27A4
METAL_ION_TRANSPORT	0.715285	0.863372	ITGAV, STOM, NDFIP1, TMEM38B, SLC39A8, COMMD3, TMCO1, SLC30A1, SLC40A1, AKAP9, SLC31A2, BCL2, PLCL1, SLMAP, GAS6, CHP1, CALCRL, GPD1L, SELENON, KCNN3, CNTN1, FXYD5, SLC30A5, PKD2, ADRB2, SLC48A1, PTGS2
REGULATION_OF_CATION_TRANSMEMBRANE_TRANSPORT	0.715863	0.863372	STOM, TMEM38B, SLC30A1, AKAP9, CCR2, SLC31A2, SLMAP, CHP1, GPD1L, SELENON, FXYD5, SLC30A5, PKD2, ADRB2
GENERATION_OF_PRECURSOR_METABOLITES_AND_ENERGY	0.716717	0.863372	IGF1, INSR, IL6ST, GYG1, ZBTB20, ETFDH, QDPR, NR1D1, FECH, FDX1, NDUFS4, NDUFAF2, GLRX2, GNPDA1, NDUFB4, NDUFC2
ION_TRANSPORT	0.719281	0.865033	ITGAV, UNC13B, CPT1A, STOM, NDFIP1, TMEM38B, SCARB2, SLC39A8, SLC17A5, PLA2G4A, COMMD3, TMCO1, SLC30A1, ANO10, SLC40A1, AKAP9, CCR2, NCOA2, SLC31A2, SLC44A1, BCL2, CYB5R1, PLCL1, SLMAP, XPR1, GAS6, CHP1, LRRC8A, APOL1, RAB3B, S100A6, CALCRL, GPD1L, SELENON, KCNN3, CNTN1, ANO5, FXYD5, SLC25A20, STARD10, SLC30A5, OSTM1, PKD2, ADRB2, SGK3, RAF1, GABRR2, SYT1, SLC48A1, PTGS2, SLCO5A1
IMMUNE_RESPONSE_REGULATING_CELL_SURFACE_RECEPTOR_SIGNALING_PATHWAY	0.722222	0.866896	FER, YES1, CYFIP1, BCL2, PAK1, DENND1B, KIT, RAF1, NFKBIZ, SRC, NCKAP1, SHC1, DUSP22
NEPHRON_DEVELOPMENT	0.723205	0.866896	BCL2, JAG1, STAT1, LGR4, FMN1, IL6R, ITGA3, PKD2, AHI1, SULF2
NEGATIVE_REGULATION_OF_CELL_ACTIVATION	0.728395	0.870752	FER, NDFIP1, CCR2, NR1D1, PELI1, MDK, CD274, IRF1, ID2, DUSP22, PARP3, TWSG1, PDE5A
CELLULAR_RESPONSE_TO_TOXIC_SUBSTANCE	0.729592	0.870752	MGST3, TXN, NFE2L2, XRN1, HGF, SESN1
G_PROTEIN_COUPLED_RECEPTOR_SIGNALING_PATHWAY	0.73	0.870752	RAPGEF2, INSR, GPRC5D, CCR2, ARHGEF12, SORT1, RAPGEF4, PLCL1, XPR1, JAK2, CRY1, CALCRL, FGD4, TSHR, PRKCA, LGR4, ITSN1, WNT5A, ESR1, TIAM1, PARD3, ADRB2, GABRR2, ARHGEF3, SRC, IQGAP2, HOMER3
NEGATIVE_REGULATION_OF_CATABOLIC_PROCESS	0.732323	0.872098	HIPK2, SVIP, ATRAID, LAMP3, BCL2, HGF, RIC1, MAPKAPK2
ORGANIC_ANION_TRANSPORT	0.736948	0.876176	UNC13B, CPT1A, SCARB2, SLC17A5, PLA2G4A, NCOA2
CELL_CELL_SIGNALING	0.739261	0.877496	MLLT3, CADPS2, BMP6, RAPGEF2, UNC13B, CPT1A, PKP4, USP46, CLOCK, MESD, EIF2AK4, ACVR2B, CYFIP1, MCC, LRP6, SLC30A1, AKAP9, CCR2, NCSTN, PREPL, NR1D1, KANK1, DKK1, HGF, RAPGEF4, PRICKLE2, NRG3, PLCL1, PFN2, BCL9, SNX19, JAK2, LIN7C, ETV5, CRY1, RAB3B, HMGN3, NDUFAF2, TSHR, MDK, CXXC4, PRKCA, RAB11FIP5, KIT, LGR4, ITSN1, WNT5A, ESR1, TIAM1, CDC73, ITGA3, CDK14, PKD2, ADRB2, RAF1, GABRR2, SYT1, CCND1
BRANCHING_MORPHOGENESIS_OF_AN_EPITHELIAL_TUBE	0.740816	0.877915	ACVR1, LRP6, BCL2, PAK1, ETV5, MDK, LGR4, WNT5A, ESR1, PKD2, SRC
RESPONSE_TO_PURINE_CONTAINING_COMPOUND	0.743878	0.878895	RAPGEF2, TMEM38B, AKAP9, XRN1, FDX1, NDUFS4, STAT1, SELENON, PKD2, SPARC, PTGS2
MULTI_ORGANISM_REPRODUCTIVE_PROCESS	0.745	0.878895	IGF1, PAM, UNC13B, BMPR2, CRTAP, ACVR2A, CLOCK, ACVR1, CAPN2, SELENOP, BCL2, CFAP44, ARMC2, ETV5, TAF4B, ETV6, MDK, GNPDA1, KIT, LGR4, HOOK1, ESR1
NEGATIVE_REGULATION_OF_SIGNALING	0.745255	0.878895	IGF1, MLLT3, ITGAV, HIPK2, ADIPOR1, ABL2, FBXW7, CLOCK, ACVR1, ARHGAP42, NFE2L2, MCC, LRP6, SLC30A1, DEPTOR, BCL2, PTCH2, NR1D1, SPART, KANK1, DKK1, HGF, DUSP26, SESN1, TMEM127, OTUD7B, FNIP2, JAG1, GAS6, CHP1, CRY1, NDUFAF2, GPD1L, MDK, STAT1, CXXC4, LTBP1, RAB11FIP5, RORA, LGR4, WNT5A, ESR1, ITGA3, PKD2, ADRB2, SGK3, RAF1, RNF149, PTGS2, SRC, BMP8A, RCAN1, SULF2, NPRL2, DUSP22, HOMER3, RNF115, …
DEPHOSPHORYLATION	0.749499	0.879241	PTPRG, PPA2, EPHX2, FAM122A, BCL2, DUSP26, CHP1, JAK2, INPP1, ARFGEF3, PDP2, SRC, RCAN1, DUSP22, G6PC3, PXYLP1, CDC14B, GPATCH2
POST_TRANSLATIONAL_PROTEIN_MODIFICATION	0.749499	0.879241	LAMC1, FBXW7, CRTAP, CALU, STT3B, FEM1C, SUMF1, GAS6, APOL1, KLHL21, LTBP1, ASB3, DCAF8, KLHL9, ADAM10, EPAS1, ICMT, CISH, SOCS2
ELECTRON_TRANSPORT_CHAIN	0.750515	0.879241	ETFDH, QDPR, FDX1, NDUFS4, NDUFAF2, GLRX2, NDUFB4, NDUFC2
CELLULAR_RESPONSE_TO_REACTIVE_OXYGEN_SPECIES	0.75261	0.879241	FER, TXN, NFE2L2, HGF, GLRX2, PKD2, SRC, IMPACT, ENDOG, MDM2, ZNF277, TPM1, RELA
REGULATION_OF_SYNAPSE_STRUCTURE_OR_ACTIVITY	0.752775	0.879241	LRRN1, MESD, CYFIP1, PDLIM5, DKK1, ETV5, ITSN1, CRIPT, WNT5A, TIAM1, SPARC, ADAM10, ZNF804A
WOUND_HEALING	0.756	0.880803	IGF1, NDNF, CARMIL1, DST, CDKN1A, NFE2L2, IFRD1, AK3, KANK1, PAK1, F11R, BCL9, GAS6, JAK2, MDK, CSRP1, PRKCA, SELENON, IRF1, WNT5A, C6orf89, RAF1, SPARC
REGULATION_OF_CELLULAR_RESPONSE_TO_STRESS	0.757	0.880803	OXR1, HIPK2, MAP3K13, SVIP, TXN, FBXW7, PJA2, EIF2AK4, NFE2L2, BCL2, DKK1, HGF, RELL1, PAK1, DDX5, GADD45A, MAGI3, CRY1, ATF6, MAPKAPK2
CALCIUM_ION_TRANSMEMBRANE_TRANSPORT	0.757732	0.880803	ITGAV, TMEM38B, TMCO1, PLCL1, GAS6
EXTRACELLULAR_STRUCTURE_ORGANIZATION	0.762763	0.885241	ITGAV, NDNF, LAMC1, TMEM38B, CAPN2, F11R, ITGA8, GAS6, DDR2
I_KAPPAB_KINASE_NF_KAPPAB_SIGNALING	0.764884	0.886294	NDFIP1, TFG, GOLT1B, MTDH, NR1D1, PELI1, OTUD7B, STAT1, RORA, WNT5A, ESR1
CELL_FATE_COMMITMENT	0.771109	0.890677	ACVR1, IFRD1, BCL2, PTCH2, DKK1, JAG1, LMO4, RORA, WNT5A, CDC73, ID2, EPAS1, RAB10
RESPONSE_TO_LIGHT_STIMULUS	0.772545	0.890677	MAP4K3, CDKN1A, CLOCK, EIF2AK4, IL12A, BCL2, FECH, CRY1, CCDC66, KIT, CCND1, ID2, PTGS2, IMPACT, EIF2S1, PER1
RESPONSE_TO_TUMOR_NECROSIS_FACTOR	0.772634	0.890677	MAP4K3, NFE2L2, NR1D1, ADAM9, GAS6, JAK2, STAT1, RORA, PTGS2, ADAM10
NEGATIVE_REGULATION_OF_PHOSPHORUS_METABOLIC_PROCESS	0.773547	0.890677	CDKN1A, LRP6, DEPTOR, CORO1C, FAM122A, DKK1, HGF, DUSP26, GADD45A, CHP1, GPD1L, CDKN2A, ARFGEF3, PARD3, RNF149, NPRL2, DUSP22, IMPACT, MBIP, PER1, SYNJ2BP
INNATE_IMMUNE_RESPONSE	0.778779	0.895289	PJA2, IL12A, NR1D1, PELI1, PAK1, RTN4, GFI1, JAK2, APOL1, IFIH1, MAPKAPK3, MAPKAPK2, STAT1, LGR4, IRF1, WNT5A, ESR1, RAF1, BST2, NCAM1, SRC
MONOVALENT_INORGANIC_CATION_TRANSPORT	0.782565	0.898227	STOM, TMEM38B, SLC17A5, COMMD3, AKAP9, SLMAP, CHP1, GPD1L, KCNN3, CNTN1, FXYD5, SLC30A5, PKD2, ADRB2
CELLULAR_RESPONSE_TO_DNA_DAMAGE_STIMULUS	0.785	0.899608	HIPK2, MYO6, CDKN1A, JMY, CLOCK, EIF2AK4, USP3, ZBTB38, BCL2, TLK1, PAK1, DDX5, GADD45A, FNIP2, CRY1, NDRG1, MAPKAPK2, PCBP4, ASCC3
REGULATION_OF_DNA_METABOLIC_PROCESS	0.786869	0.900336	BMPR2, NDFIP1, CDKN1A, XRN1, HGF
NEGATIVE_REGULATION_OF_CELL_CYCLE	0.791792	0.904065	BMI1, RRAGD, CDKN1A, JMY, CLOCK, EIF2AK4, IL12A, BCL2, GADD45A, CHMP4C, GAS6, CRY1, PCBP4, CDKN2A, IRF1, CDC73, PKD2, CCND1, ID2, PTGS2
REGULATION_OF_MUSCLE_SYSTEM_PROCESS	0.793587	0.904065	IGF1, IL6ST, TMEM38B, ARHGAP42, AKAP9, PAK1, CALCRL, PRKCA, SELENON, KIT, PPP1R12B, ADRB2, PTGS2
EMBRYONIC_MORPHOGENESIS	0.795	0.904065	ITGAV, HIPK2, BMPR2, ACVR2A, ACVR1, ACVR2B, LRP6
CELLULAR_NITROGEN_COMPOUND_CATABOLIC_PROCESS	0.795082	0.904065	TET1, DPYD, XRN1, DDX5, MAPKAPK2, PRKCA, PCBP4, CTIF
CANONICAL_WNT_SIGNALING_PATHWAY	0.79697	0.904802	MLLT3, MCC, LRP6, KANK1, DKK1, BCL9, MDK, LGR4, WNT5A, CDK14, SRC, SULF2, FRZB, ANKRD6, DISC1
CELL_CELL_SIGNALING_BY_WNT	0.801603	0.907978	MLLT3, MESD, MCC, LRP6, KANK1, DKK1, PRICKLE2, BCL9, MDK, CXXC4, LGR4, WNT5A, ESR1, TIAM1, CDC73, ITGA3, CDK14, PKD2, CCND1, SRC, SULF2, FRZB, ANKRD6
TRANSFORMING_GROWTH_FACTOR_BETA_RECEPTOR_SIGNALING_PATHWAY	0.802254	0.907978	ZFYVE9, HIPK2, ACVR1, F11R, ITGA8, ADAM9, LTBP1, ITGA3, PARD3, SRC, DUSP22
NEGATIVE_REGULATION_OF_RESPONSE_TO_STIMULUS	0.808192	0.913282	IGF1, MLLT3, ITGAV, OXR1, HIPK2, FER, ADIPOR1, ABL2, SVIP, TXN, FBXW7, NDFIP1, CDKN1A, CLOCK, ACVR1, ARHGAP42, C5orf30, NFE2L2, MCC, LRP6, CCR2, DEPTOR, BCL2, PTCH2, NR1D1, SPART, KANK1, DKK1, HGF, DUSP26, SESN1, TMEM127, OTUD7B, FNIP2, JAG1, GAS6, CHP1, CRY1, CALCRL, NDUFAF2, GPD1L, MDK, STAT1, CXXC4, LTBP1, RORA, LGR4, WNT5A, ESR1, HELB, ITGA3, PKD2, ADRB2, SGK3, RAF1, RNF149, BST2, PTGS2, SRC,…
CELLULAR_RESPONSE_TO_CHEMICAL_STRESS	0.811623	0.914364	OXR1, FER, TXN, CPEB2, FBXW7, NFE2L2, BCL2, HGF, JAK2, ETV5, NUDT2, GLRX2, SELENON, PKD2, PTGS2, SRC, EPAS1, IMPACT, EIF2S1, MBIP, VRK2
NEGATIVE_REGULATION_OF_WNT_SIGNALING_PATHWAY	0.811655	0.914364	MLLT3, MCC, LRP6, DKK1, MDK, CXXC4, WNT5A
RESPONSE_TO_RADIATION	0.816633	0.917427	MAP4K3, TXN, CDKN1A, CLOCK, EIF2AK4, IL12A, BCL2, FECH, F11R, GADD45A, CRY1, CCDC66, KIT, ALAD, CCND1, ID2, PTGS2, SWI5, IMPACT, EIF2S1, PER1
CELLULAR_AMINO_ACID_METABOLIC_PROCESS	0.816887	0.917427	AUH, PPA2, DPYD, QDPR
HEAD_DEVELOPMENT	0.819181	0.91859	RBFOX2, RAPGEF2, ATXN1, BMPR2, PTPRG, TIPARP, LRP6, SELENOP, NCSTN, TTBK2, TBC1D23, BCL2, DKK1, PAK1, RTN4, NRG3, ITGA8, NDUFS4, BTBD3, FOXP2, MDK, RORA, CNTN1, ITSN1, WNT5A
NEGATIVE_REGULATION_OF_CELL_POPULATION_PROLIFERATION	0.823	0.921457	RAPGEF2, BMPR2, ATRAID, FBXW7, NDFIP1, CDKN1A, MCC, IL12A, KLF11, CLMN, BCL2, PELI1, PAK1, TMEM127, JAK2, NDRG1, KLF13, CD274, STAT1, CDKN2A, IRF1, WNT5A, CDC73, PKD2, RAF1, SPARC, ID2, PTGS2
REGULATION_OF_WNT_SIGNALING_PATHWAY	0.826479	0.923936	MLLT3, MCC, LRP6, KANK1, DKK1, MDK, CXXC4, LGR4, WNT5A, ESR1, TIAM1, CDC73, ITGA3, CDK14, SRC, SULF2, FRZB, ANKRD6
RESPONSE_TO_DRUG	0.828172	0.924412	PAM, MYO6, CPT1A, TXN, TMEM38B, USP46, CDKN1A, NFE2L2, CAPN2, NCOA2, NCSTN, QDPR, XRN1, BCL2, FECH, HGF, JAG1, FDX1, ADAM9, GAS6, RAB3B, MDK, GLRX2, STAT1, SELENON, GGH, TIAM1, ITGA3, ALAD, SYT1, SPARC, CCND1, RNF149, PTGS2, SRC
CYTOKINE_MEDIATED_SIGNALING_PATHWAY	0.831	0.926153	FER, ADIPOR1, IL6ST, CDKN1A, STAT4, IL12A, CCR2, BCL2, HGF, PELI1, GFI1, GAS6, JAK2, IL5RA, STAT1, RORA, KIT, IRF1, WNT5A, IL6R, CCND1, BST2, PTGS2, NCAM1, SHC1, VRK2, CISH, FGF2, IFITM1, SOCS2, KRAS, LEPR
SODIUM_ION_TRANSPORT	0.836066	0.927962	STOM, COMMD3, SLMAP, CHP1, GPD1L, CNTN1, FXYD5, PKD2, ADRB2
ANION_TRANSMEMBRANE_TRANSPORT	0.836629	0.927962	CPT1A, ANO10, XPR1, LRRC8A, APOL1, ANO5, SLC25A20, GABRR2
RNA_SPLICING	0.838384	0.927962	RBFOX2, HNRNPLL, DDX5, TSEN15, U2SURP, LUC7L2, HABP4, U2AF1, U2AF1L5
REGULATION_OF_MITOTIC_CELL_CYCLE	0.839679	0.927962	IGF1, INSR, RDX, CDKN1A, AKAP9, BCL2, STAG1, CCSAP, GADD45A, CHMP4C, PRKCA, PCBP4, CDKN2A, CDC73, PKD2, CCND1, ID2
REGULATION_OF_BLOOD_PRESSURE	0.840791	0.927962	BMPR2, ARHGAP42, EPHX2, F11R, GAS6, ADRB2, ID2, PTGS2
CALCIUM_MEDIATED_SIGNALING	0.842213	0.927962	IGF1, TMEM38B, CCR2, CHP1, SELENON, PKD2, RCAN1, HOMER3, NUDT4, SRI, AKAP6
SECOND_MESSENGER_MEDIATED_SIGNALING	0.843531	0.927962	IGF1, NDNF, RAPGEF2, TMEM38B, CCR2, RAPGEF4, CHP1, NDUFS4, CALCRL, TSHR, PRKCA, SELENON, LGR4
EMBRYONIC_ORGAN_MORPHOGENESIS	0.843878	0.927962	HIPK2, ACVR1, LRP6, ITGA8, WNT5A, PKD2, ID2, AHI1, LRIG3, FRZB
HEART_MORPHOGENESIS	0.844064	0.927962	INSR, BMPR2, ACVR1, DKK1, RTN4, JAG1
CARDIAC_SEPTUM_DEVELOPMENT	0.848643	0.931593	BMPR2, ACVR1, JAG1, LMO4, LTBP1, WNT5A, ID2
ANION_TRANSPORT	0.850851	0.932614	UNC13B, CPT1A, SCARB2, SLC17A5, PLA2G4A, ANO10, NCOA2, CYB5R1, XPR1, LRRC8A, APOL1, ANO5, SLC25A20, STARD10, GABRR2, SYT1, SLCO5A1, PPFIA1, SLC6A9, G6PC3, SLC27A4, ATP10B, GPR89A, GPR89B
REGULATION_OF_BLOOD_CIRCULATION	0.855711	0.935606	BMPR2, TMEM38B, ARHGAP42, AKAP9
HEART_DEVELOPMENT	0.856144	0.935606	IGF1, PAM, INSR, BMPR2, CDKN1A, ACVR1, ACVR2B, LRP6, PDLIM5, DKK1, PAK1, RTN4, JAG1, LMO4
CARTILAGE_DEVELOPMENT	0.857579	0.935774	BMP6, BMPR2, LRP6, BMP8B, SNX19, MDK, WNT5A, BMP8A, SULF2, FRZB, THRA, FGF2, LNPK, RELA, ROR2
MULTICELLULAR_ORGANISMAL_HOMEOSTASIS	0.867	0.944642	BMP6, ADIPOR1, VPS54, RAB3D, ACVR2B, SLC40A1, CCR2, BCL2, NR1D1, PLCL1, JAK2, GRHL1, LSR, TSHR, CCDC66, PRKCA, ESRRG, LGR4, MYO5B, ADRB2, PTGS2, SRC, BMP8A
CELL_CHEMOTAXIS	0.87449	0.951382	IL12A, CCR2, HGF, GAS6, MDK, KIT, WNT5A, TIAM1, IL6R
COFACTOR_BIOSYNTHETIC_PROCESS	0.877925	0.953698	NFE2L2, QDPR, FECH, GPHN, SLC25A16, NADK2, MMACHC, ALAD, PDP2, ELOVL7, PTGS2
CONNECTIVE_TISSUE_DEVELOPMENT	0.880282	0.953811	BMP6, BMPR2, LRP6, BMP8B, SPART, SNX19, MDK, WNT5A, IL6R, ID2, BMP8A, SULF2, FRZB, THRA, FGF2
MRNA_METABOLIC_PROCESS	0.880642	0.953811	RBFOX2, HNRNPLL, XRN1, DDX5, MAPKAPK2, PRKCA, PCBP4, TSEN15, CTIF, U2SURP, LUC7L2, HABP4, U2AF1, U2AF1L5, CDC73
POSITIVE_REGULATION_OF_PROTEOLYSIS	0.883673	0.955197	FBXW7, FAM162A, NFE2L2, FAM122A, ADAM9, JAK2, PERP
RIBOSE_PHOSPHATE_METABOLIC_PROCESS	0.884538	0.955197	IGF1, INSR, ZBTB20, FAR2, AK3, UCK2, MAGI3
SMALL_MOLECULE_CATABOLIC_PROCESS	0.886774	0.956196	AIG1, CPT1A, AUH, DPYD, ETFDH, QDPR, ALDH3A2, CHP1, SRD5A3, INPP1, GK5, GNPDA1
REGULATION_OF_CELLULAR_RESPONSE_TO_GROWTH_FACTOR_STIMULUS	0.890132	0.958402	HIPK2, BMPR2, CYFIP1, SPART, DKK1, ITGA8, LTBP1, WNT5A, ITGA3, SULF2, MYOF
NEGATIVE_REGULATION_OF_MITOTIC_CELL_CYCLE	0.891975	0.958972	CDKN1A, BCL2, GADD45A, CHMP4C, PCBP4, CDKN2A, CDC73, PKD2, CCND1
MRNA_PROCESSING	0.896378	0.962288	RBFOX2, HNRNPLL, DDX5, TSEN15, U2SURP, LUC7L2, HABP4, U2AF1, U2AF1L5, CDC73
RESPONSE_TO_MECHANICAL_STIMULUS	0.8998	0.963454	BMP6, F11R, GADD45A, FOXP2, MDK, STAT1, KIT, IRF1, HABP4, PKD2, RAF1, PTGS2, SRC
CYCLIC_NUCLEOTIDE_MEDIATED_SIGNALING	0.900104	0.963454	RAPGEF2, RAPGEF4, NDUFS4, CALCRL, TSHR, PRKCA, LGR4, ADRB2
RESPONSE_TO_ORGANOPHOSPHORUS	0.902185	0.964268	RAPGEF2, AKAP9, FDX1, NDUFS4, STAT1, PKD2, SPARC, PTGS2
LEUKOCYTE_CHEMOTAXIS	0.908429	0.969522	IL12A, CCR2, GAS6, MDK, KIT, WNT5A, IL6R
REGULATION_OF_SYSTEM_PROCESS	0.913	0.971786	IGF1, BMP6, UNC13B, IL6ST, BMPR2, TMEM38B, ARHGAP42, AKAP9, HGF, PAK1, GAS6, JAK2, CRY1, CALCRL, GPD1L, PRKCA, SELENON, RAB11FIP5, KIT
REGULATION_OF_METAL_ION_TRANSPORT	0.914915	0.971786	STOM, TMEM38B, SLC30A1, AKAP9, SLC31A2, BCL2, SLMAP, CHP1, GPD1L, SELENON, CNTN1, FXYD5, PKD2, ADRB2, PTGS2
AXON_DEVELOPMENT	0.917	0.971786	BMPR2, MAP3K13, CAMSAP2, GOLGA4, CYFIP1, IFRD1, BCL2, SPART, RHOBTB3, PAK1, RTN4, JAK2, S100A6, PRKCA, WNT5A, TIAM1, PARD3, EPHA6, NCAM1, SRC, SHC1
REGULATION_OF_MEMBRANE_POTENTIAL	0.917671	0.971786	UNC13B, PPA2, AKAP9, BCL2, SLC25A36, SPART, SLMAP, GPD1L
MORPHOGENESIS_OF_AN_EPITHELIUM	0.919	0.971786	MLLT3, MPP5, ACVR1, LRP6, BCL2, DKK1, HGF, PAK1, PRICKLE2, JAG1, LMO4, LIN7C, ETV5, MDK, STAT1, LGR4, WNT5A, FMN1, ESR1, TIAM1
TAXIS	0.921	0.971786	ITGAV, FER, BMPR2, CYFIP1, IL12A, CCR2, HGF, RHOBTB3, NRG3, GAS6, MDK, PRKCA, KIT, WNT5A, TIAM1, IL6R, EPHA6, ID2, NCAM1, SRC, ADAM10, SHC1
CELL_SURFACE_RECEPTOR_SIGNALING_PATHWAY_INVOLVED_IN_CELL_CELL_SIGNALING	0.921922	0.971786	MLLT3, UNC13B, MESD, MCC, LRP6, KANK1, DKK1, PRICKLE2, BCL9, MDK, CXXC4, LGR4, WNT5A, ESR1, TIAM1, CDC73, ITGA3, CDK14, PKD2, ADRB2, CCND1, SRC, SULF2
ORGANOPHOSPHATE_METABOLIC_PROCESS	0.924076	0.971786	IGF1, INSR, PIP5K1B, ZBTB20, TMEM38B, PIK3C2A, PLA2G4A, FAR2, FITM2, CAPN2, SPTLC1, AK3, SLC44A1, TK2, GPHN, UCK2, PLCL1, MAGI3, SRD5A3, DCTD, GPD1L, INPP1, GK5, NADK2, FAM126B, DOLK, RORA, KIT, AASS, STARD10, PDP2, MBOAT1, ELOVL7, PTGS2, SRC, PIGM, SUCLG1, GMPR, REXO2, NUDT4, G6PC3, SOCS7, CISH, SUCLG2, FGF2, SOCS2
CELL_DIVISION	0.925777	0.971786	CSPP1, PKP4, SNX18, STAG1, SPART, CCSAP, SH3GLB1, CHMP4C, ETV5, KLHL21, SPICE1, MDK, KIT, PARD3, CDK14, CCND1, KLHL9
ANATOMICAL_STRUCTURE_HOMEOSTASIS	0.926854	0.971786	VPS54, RAB3D, CCR2, CFL2, XRN1, BCL2
AGING	0.927346	0.971786	CDKN1A, NFE2L2, SEC63, BCL2, DKK1, CISD2, GLRX2, CDKN2A, ID2, PTGS2, EIF2S1, KRAS, ENDOG, PICALM, ZNF277, RELA, EDNRB, FBXO4
COENZYME_METABOLIC_PROCESS	0.927565	0.971786	BTD, FAR2, QDPR, GPHN, SLC25A16, NADK2, GGH, AASS, PDP2, ELOVL7, PTGS2, SUCLG1
REGULATION_OF_BODY_FLUID_LEVELS	0.927856	0.971786	PAM, CARMIL1, NFE2L2, AK3, F11R, GAS6, JAK2, GRHL1, LSR, CSRP1, PRKCA, IRF1, MYO5B, RAF1, CCND1, SRC
REGULATION_OF_ION_TRANSMEMBRANE_TRANSPORT	0.930792	0.97305	STOM, TMEM38B, SLC30A1, AKAP9, CCR2, SLC31A2, SLMAP, CHP1, GPD1L, SELENON, FXYD5, SLC30A5, PKD2, ADRB2
MUSCLE_SYSTEM_PROCESS	0.931932	0.97305	IGF1, IL6ST, TMEM38B, PIK3C2A, ARHGAP42, AKAP9, PDLIM5, PAK1, SLMAP, CALCRL, GPD1L, PRKCA, SELENON, KIT, TIAM1, PPP1R12B, ADRB2, PTGS2, SULF2, MYOF
PROTEIN_LOCALIZATION_TO_NUCLEUS	0.935052	0.97305	TXN, CDKN1A, OTUD7B, CHP1, PTGS2, SRC, IPO11, SUPT7L
CILIUM_ORGANIZATION	0.935614	0.97305	C5orf30, AKAP9, TTBK2, TMEM107, CFAP44, ARMC2, CCDC66, TBC1D30, PKD2, AHI1, IFT74, POC1B, CDC14B, DISC1
SMOOTH_MUSCLE_CONTRACTION	0.938413	0.97305	PIK3C2A, ARHGAP42, CALCRL, KIT, ADRB2, PTGS2, SULF2
CIRCULATORY_SYSTEM_PROCESS	0.939	0.97305	BMP6, YES1, BMPR2, TMEM38B, PIK3C2A, ARHGAP42, AKAP9, EPHX2
SENSORY_PERCEPTION	0.940822	0.97305	CRYBG3, MYO6, UBR3, CCR2
NUCLEOBASE_CONTAINING_SMALL_MOLECULE_METABOLIC_PROCESS	0.941	0.97305	IGF1, INSR, UAP1, ZBTB20, DPYD, FAR2, AK3, EXTL2, TK2, UCK2, MAGI3, DCTD, NADK2, GNPDA1, RORA, AASS, PDP2, ELOVL7, PTGS2, SUCLG1, GMPR, REXO2
MUSCLE_STRUCTURE_DEVELOPMENT	0.941059	0.97305	IGF1, ACVR1, CAPN2, PDLIM5, IFRD1, CFL2, BCL2, DKK1, PAK1, DDX5, SORT1, BCL9, ITGA8, JAG1, FOXP2, CSRP1, SELENON, MKX, RORA, KIT, WNT5A
COAGULATION	0.94668	0.977477	CARMIL1, NFE2L2, AK3, F11R, GAS6, JAK2, CSRP1, PRKCA, IRF1, RAF1, SRC
CARDIAC_VENTRICLE_DEVELOPMENT	0.95567	0.984143	BMPR2, ACVR1, JAG1, LMO4, LTBP1, WNT5A, ID2
MUSCLE_ORGAN_DEVELOPMENT	0.955956	0.984143	IGF1, CFL2, BCL2, DKK1, PAK1, DDX5, BCL9, FOXP2, SELENON, MKX, WNT5A
TISSUE_HOMEOSTASIS	0.957576	0.984143	VPS54, RAB3D, CCR2, BCL2, CCDC66, PRKCA, ADRB2, SRC, EPAS1, POC1B, KRAS, MC4R, PDK4
REGULATION_OF_MUSCLE_CONTRACTION	0.959308	0.984143	TMEM38B, ARHGAP42, AKAP9, CALCRL, KIT, PPP1R12B, ADRB2, PTGS2
PROTEIN_CONTAINING_COMPLEX_LOCALIZATION	0.959877	0.984143	USP46, GPHN, KLHL21, PURA, U2AF1, GRIP1, ADAM10, SYNJ2BP, IFT74
DNA_METABOLIC_PROCESS	0.962	0.984937	TET1, BMPR2, NDFIP1, CDKN1A, JMY, USP3, XRN1, TK2, HGF, GADD45A
EPITHELIAL_TUBE_MORPHOGENESIS	0.965932	0.98563	ACVR1, LRP6, BCL2, PAK1, LMO4, ETV5, MDK, LGR4, WNT5A, FMN1, ESR1, PKD2, SRC, AHI1
COFACTOR_METABOLIC_PROCESS	0.965932	0.98563	BTD, FAR2, NFE2L2, QDPR, FECH, GPHN, SLC25A16, GLRX2, NADK2, GGH, MMACHC, AASS, ALAD, PDP2, ELOVL7, PTGS2
PEPTIDYL_LYSINE_MODIFICATION	0.967347	0.98563	CLOCK, PRDM5, GFI1, KAT6B, IFIH1, EID1, SUPT7L, MBIP, PER1, ING3, MDM2, SUPT3H, LIPT2, RELA
REGULATION_OF_ION_TRANSPORT	0.970971	0.98563	STOM, TMEM38B, SLC30A1, AKAP9, CCR2, SLC31A2, BCL2, SLMAP, CHP1, RAB3B, GPD1L, SELENON, CNTN1, FXYD5, SLC30A5, PKD2, ADRB2, SYT1, PTGS2, HOMER3, PER1, SRI, GPR89A, GPR89B, AKAP6
CARDIAC_CHAMBER_DEVELOPMENT	0.971193	0.98563	BMPR2, ACVR1, JAG1, LMO4, LTBP1, WNT5A, ID2
EMBRYONIC_ORGAN_DEVELOPMENT	0.971916	0.98563	HIPK2, ACVR1, LRP6, TBC1D23, ITGA8, KIT, WNT5A, PKD2, ID2, AHI1, EPAS1, LRIG3, FRZB
FOREBRAIN_DEVELOPMENT	0.975952	0.98563	RAPGEF2, LRP6, DKK1, RTN4, NRG3, BTBD3, FOXP2, MDK
TELENCEPHALON_DEVELOPMENT	0.977551	0.98563	LRP6, RTN4, NRG3, BTBD3, FOXP2, MDK, WNT5A, ID2
RNA_PROCESSING	0.978	0.98563	RBFOX2, HNRNPLL, ATXN1, CCNL1, RBMS1, DDX5, TRNT1, TSEN15, U2SURP, LUC7L2, RCL1, ESR1, HABP4, U2AF1, U2AF1L5, CDC73
CELLULAR_RESPIRATION	0.978079	0.98563	ETFDH, NDUFS4, NDUFAF2, NDUFB4, NDUFC2, SUCLG1, NDUFV3, SUCLG2, GPD2
POSITIVE_REGULATION_OF_ION_TRANSPORT	0.978637	0.98563	AKAP9, CCR2, CHP1, RAB3B, GPD1L, CNTN1, PKD2, ADRB2
TISSUE_MORPHOGENESIS	0.979021	0.98563	MLLT3, MPP5, BMPR2, ACVR1, LRP6, BCL2, DKK1, HGF, PAK1, PRICKLE2, ITGA8, JAG1, LMO4, LIN7C, ETV5, MDK, STAT1, LGR4, WNT5A, FMN1, ESR1, TIAM1, ITGA3, PKD2
REGULATION_OF_CALCIUM_ION_TRANSPORT	0.980229	0.98563	TMEM38B, SLC30A1, BCL2, SELENON, PKD2, PTGS2, HOMER3, SRI, AKAP6
NEURON_PROJECTION_GUIDANCE	0.9889	0.992981	BMPR2, CYFIP1, RHOBTB3, PRKCA, WNT5A, EPHA6, NCAM1, SRC, SHC1
MUSCLE_CONTRACTION	0.996994	0.999733	TMEM38B, PIK3C2A, ARHGAP42, AKAP9, SLMAP, CALCRL, GPD1L, KIT, PPP1R12B, ADRB2, PTGS2, SULF2, MYOF
HEART_PROCESS	0.998983	1	TMEM38B, AKAP9, JAK2, GPD1L, SRC, EPAS1, THRA, SRI, PDE5A, MDM2, TPM1
