# Supplementary material for: Chromatin activation as a unifying principle underlying pathogenic mechanisms in multiple myeloma
Source: Genome Res. 2020 Sep;30(9):1217–27. doi: 10.1101/gr.265520.120 (PMC7545147; doi:10.1101/gr.265520.120)
Supplement: Supplemental Material [file supp_gr.265520.120_Supplemental_Table_S8.xlsx]

## Sheet: Hoja1
Supplemental Table S8. Genes included in co-regulated chromatin regions. Gene pair selected for downstream analysis is shaded.
Gene pairs						Gene triplets
Gene 1	Gene 2	Gene 1	Gene 2	Gene 1	Gene 2	Gene 1	Gene 2	Gene 3
ADAM10	FAM63B	GLRX2	CDC73	PELI1	LGALSL	TSEN15	C1orf21	EDEM3
ADAM22	SRI	GMPR	ATXN1	PERP	KIAA1244
ADIPOR1	CYB5R1	HMGN3	LCA5	PRDM5	NDNF
AK3	RCL1	IFRD2	NAT6	PURA	IGIP
ANKS6	GALNT12	IQGAP2	F2R	RDX	FDX1
APOL2	APOL1	ITGAV	FAM171B	RHOQ	CRIPT
ARHGEF12	GRIK4	MARVELD2	OCLN	RNF133	RNF148
BRMS1L	MBIP	METTL5	UBR3	RRAGD	ANKRD6
COMMD3	BMI1	MKX	ARMC4	SEC63	OSTM1
CSRP1	NAV1	MSANTD4	KBTBD3	SPTLC1	IARS
FAM219B	COX5A	NDUFC2	ALG8	STAT4	MYO1B
FANCC	PTCH1	NIT2	TOMM70A	TK2	CKLF
FECH	NARS	NXPE1	NXPE4	UBA5	NPHP3
GLCCI1	ICA1	OSBPL1A	IMPACT
