# Supplementary material for: Chromatin activation as a unifying principle underlying pathogenic mechanisms in multiple myeloma
Source: Genome Res. 2020 Sep;30(9):1217–27. doi: 10.1101/gr.265520.120 (PMC7545147; doi:10.1101/gr.265520.120)
Supplement: Supplemental Material [file supp_gr.265520.120_Supplemental_Table_S9.xlsx]

## Sheet: Hoja1
Supplemental Table S9. Primers and target sequences used in this study
Short hairpin RNAs sequences
Type	Target	Name	Sequence (5'- 3')
shRNA target	GFP	shGFPFw	CCGGACAACAGCCACAACGTCTATACTCGAGTATAGACGTTGTGGCTGTTGTTTTTG
shRNA target		shGFPRv	AATTCAAAAACAACAGCCACAACGTCTATACTCGAGTATAGACGTTGTGGCTGTTGT
shRNA target	PRDM5	shPRDM5 #1 Fw	CCGGCGACACAAGATGACTCATATTCTCGAGAATATGAGTCATCTTGTGTCGTTTTTG
shRNA target		shPRDM5 #1 Rv	AATTCAAAAACGACACAAGATGACTCATATTCTCGAGAATATGAGTCATCTTGTGTCG
shRNA target		shPRDM5 #2 Fw	CCGGGGTGTAGCTGACAGCTAATAGCTCGAGCTATTAGCTGTCAGCTACACCTTTTTG
shRNA target		shPRDM5 #2 Rv	AATTCAAAAAGGTGTAGCTGACAGCTAATAGCTCGAGCTATTAGCTGTCAGCTACACC
shRNA target	NDNF	shNDNF #1 Fw	CCGGGTACTATGGAAGGAAGGATATCTCGAGATATCCTTCCTTCCATAGTACTTTTTG
shRNA target		shNDNF #1 Rv	AATTCAAAAAGTACTATGGAAGGAAGGATATCTCGAGATATCCTTCCTTCCATAGTAC
shRNA target		shNDNF #2 Fw	CCGGGGACATTAAATCACTTTAAATCTCGAGATTTAAAGTGATTTAATGTCCTTTTTG
shRNA target		shNDNF #2 Rv	AATTCAAAAAGGACATTAAATCACTTTAAATCTCGAGATTTAAAGTGATTTAATGTCC
shRNA target		shNDNF #3 Fw	CCGGGCTTAGAGGAAAACCTAAAATCTCGAGATTTTAGGTTTTCCTCTAAGCTTTTTG
shRNA target		shNDNF #3 Rv	AATTCAAAAAGCTTAGAGGAAAACCTAAAATCTCGAGATTTTAGGTTTTCCTCTAAGC
shRNA target		shNDNF #4 Fw	CCGGGTATCAGAGTAAGGTTGTGAACTCGAGTTCACAACCTTACTCTGATACTTTTTG
shRNA target		shNDNF #4 Rv	AATTCAAAAAGTATCAGAGTAAGGTTGTGAACTCGAGTTCACAACCTTACTCTGATAC
sequencing primer	Tet_pLKO	Tet_pLKOSeqFw	GGCAGGGATATTCACCATTATCGTTTCAGA
gRNA sequences
Type	Target	Name	Sequence (5'- 3')
gRNA	TXN	gTXN#1 Fw	TTTATCACCTGCAGCGTCCA
gRNA		gTXN#1 Rv	TGGACGCTGCAGGTGATAAA
gRNA		gTXN#2 Fw	TAGTTGACTTCTCAGCCACG
gRNA		gTXN#2 Rv	CGTGGCTGAGAAGTCAACTA
sequencing primer	U6 promoter	U6 SeqFw	TAATTTCTTGGGTAGTTTGC
gRNA	TXN Enhancer	gEnh1	AGTGTACCATTGATGACCAT
gRNA		gEnh2	GGGGTAAAAAATTTAAGGGG
CRISPR-Cas9 editing validation by TIDE
Type	Target	Name	Sequence (5'- 3')
validation PCR	TXN Enhancer (internal primers)	TXN_5’Enh_Fw	AGGCGAGATCTTGCTGTGTT
validation PCR		TXN_5’Enh_Rv	CTCACAACACTTTGGGCAGA
validation PCR	TXN Enhancer (external primers)	TXN_5’Enh_Fw	AGGCGAGATCTTGCTGTGTT
validation PCR		TXN_3’Enh_Rv	CCATGATGCCTGGCTAATTT
validation PCR	TXN Exon2	Seq TXN Ex2 Fw	ATTTGGCTTGTTTGGGGATT
validation PCR		Seq TXN Ex2 Rv	TCCTACCACTGTGACCACCA
CRISPR-Cas9 editing validation by NGS
Type	Target	Name	Sequence (5'- 3')
PCR for NGS validation	TXN Exon2	Seq NGS TXN Ex2 Fw	ACACGACGCTCTTCCGATCTTCCTACCACTGTGACCACCA
PCR for NGS validation		Seq NGS TXN Ex2 Rv	CTGGAGTTCAGACGTGTGCTCTTCCGATCTATTTGGCTTGTTTGGGGATT
barcoding PCR	Nested PCR	P5-i5-BC	AATGATACGGCGACCACCGAGATCTACACNNNNNNNNACACTCTTTCCCTACACGACGCTCTTCCGATCT
barcoding PCR		rP7-i7-BC	CAAGCAGAAGACGGCATACGAGATNNNNNNNGTGACTGGAGTTCAGACGTGTGCT
Expression analysis by RT-qPCR
Type	Target	Name	Sequence (5'- 3')
RT-qPCR	PRDM5	PRDM5 Fw	AAGTGCTCAGAGTGCAGCAA
RT-qPCR		PRDM5 Rv	GGGACGATTGGGATTATGAG
RT-qPCR	NDNF	NDNF Fw	CCTTTGGAGTGGAAGCTGAG
RT-qPCR		NDNF Rv	AACCGGATGGGGAACTAGAC
RT-qPCR	TXN	TXN Fw	TTCCAACGTGATATTCCTTGA
RT-qPCR		TXN Rv	GGTGGCTTCAAGCTTTTCCT
RT-qPCR	GUSβ	GUSβFw	GAAAATATGTGGTTGGAGAGCTCATT
RT-qPCR		GUSβRv	CCGAGTGAAGATCCCCTTTTTA
RT-qPCR	GAPDH	GAPDHFw	CCAAGGTCATCCATGACAAC
RT-qPCR		GAPDHRv	TGTCATACCAGGAAATGAGC
